# Supplementary material
Source: publisher figshare collection journal article supplement (https://acs.figshare.com/ndownloader/files/5395316)
Supplement: Supplementary file 1 [file 5395316]

 
data_spv1rc 
 
_audit_creation_method            SHELXL-97 
_chemical_name_systematic 
; 
 ? 
; 
_chemical_name_common             ? 
_chemical_melting_point           ? 
_chemical_formula_moiety          ? 
_chemical_formula_sum 
 'C36 H47 N P2' 
_chemical_formula_weight          555.69 
 
loop_ 
 _atom_type_symbol 
 _atom_type_description 
 _atom_type_scat_dispersion_real 
 _atom_type_scat_dispersion_imag 
 _atom_type_scat_source 
 'C'  'C'   0.0033   0.0016 
 'International Tables Vol C Tables 4.2.6.8 and 6.1.1.4' 
 'H'  'H'   0.0000   0.0000 
 'International Tables Vol C Tables 4.2.6.8 and 6.1.1.4' 
 'N'  'N'   0.0061   0.0033 
 'International Tables Vol C Tables 4.2.6.8 and 6.1.1.4' 
 'P'  'P'   0.1023   0.0942 
 'International Tables Vol C Tables 4.2.6.8 and 6.1.1.4' 
 
_symmetry_cell_setting            'monoclinic' 
_symmetry_space_group_name_H-M    'P2(1)/c' 
 
loop_ 
 _symmetry_equiv_pos_as_xyz 
 'x, y, z' 
 '-x, y+1/2, -z+1/2' 
 '-x, -y, -z' 
 'x, -y-1/2, z-1/2' 
 
_cell_length_a                    12.0262(9) 
_cell_length_b                    14.3646(11) 
_cell_length_c                    18.9076(13) 
_cell_angle_alpha                 90.00 
_cell_angle_beta                  100.514(2) 
_cell_angle_gamma                 90.00 
_cell_volume                      3211.5(4) 
_cell_formula_units_Z             4 
_cell_measurement_temperature     123(2) 
_cell_measurement_reflns_used     6824 
_cell_measurement_theta_min       2.23 
_cell_measurement_theta_max       28.56 
 
_exptl_crystal_description        'block' 
_exptl_crystal_colour             ? 
_exptl_crystal_size_max           0.27 
_exptl_crystal_size_mid           0.22 
_exptl_crystal_size_min           0.11 
_exptl_crystal_density_meas       ? 
_exptl_crystal_density_diffrn     1.149 
_exptl_crystal_density_method     'not measured' 
_exptl_crystal_F_000              1200 
_exptl_absorpt_coefficient_mu     0.160 
_exptl_absorpt_correction_type    'multi-scan' 
_exptl_absorpt_correction_T_min   0.6725 
_exptl_absorpt_correction_T_max   0.7457 
_exptl_absorpt_process_details    'Bruker AXS area detector scaling and absorption correction' 
 
_exptl_special_details 
; 
 ? 
; 
 
_diffrn_ambient_temperature       123(2) 
_diffrn_radiation_wavelength      0.71073 
_diffrn_radiation_type            MoK\a 
_diffrn_radiation_source          'fine-focus sealed tube' 
_diffrn_radiation_monochromator   graphite 
_diffrn_measurement_device_type   'Bruker APEX-II' 
_diffrn_measurement_method        ? 
_diffrn_detector_area_resol_mean  ? 
_diffrn_standards_number          ? 
_diffrn_standards_interval_count  ? 
_diffrn_standards_interval_time   ? 
_diffrn_standards_decay_%         ? 
_diffrn_reflns_number             47259 
_diffrn_reflns_av_R_equivalents   0.0630 
_diffrn_reflns_av_sigmaI/netI     0.0542 
_diffrn_reflns_limit_h_min        -16 
_diffrn_reflns_limit_h_max        15 
_diffrn_reflns_limit_k_min        -18 
_diffrn_reflns_limit_k_max        18 
_diffrn_reflns_limit_l_min        -25 
_diffrn_reflns_limit_l_max        25 
_diffrn_reflns_theta_min          1.72 
_diffrn_reflns_theta_max          28.59 
_reflns_number_total              7589 
_reflns_number_gt                 5602 
_reflns_threshold_expression      >2sigma(I) 
 
_computing_data_collection        ? 
_computing_cell_refinement        ? 
_computing_data_reduction         ? 
_computing_structure_solution     'SHELXS-97 (Sheldrick, 1990)' 
_computing_structure_refinement   'SHELXL-97 (Sheldrick, 1997)' 
_computing_molecular_graphics     ? 
_computing_publication_material   ? 
 
_refine_special_details 
; 
 Refinement of F^2^ against ALL reflections.  The weighted R-factor wR and 
 goodness of fit S are based on F^2^, conventional R-factors R are based 
 on F, with F set to zero for negative F^2^. The threshold expression of 
 F^2^ > 2sigma(F^2^) is used only for calculating R-factors(gt) etc. and is 
 not relevant to the choice of reflections for refinement.  R-factors based 
 on F^2^ are statistically about twice as large as those based on F, and R- 
 factors based on ALL data will be even larger. 
; 
 
_refine_ls_structure_factor_coef  Fsqd  
_refine_ls_matrix_type            full 
_refine_ls_weighting_scheme       calc  
_refine_ls_weighting_details 
 'calc w=1/[\s^2^(Fo^2^)+(0.0248P)^2^+2.8203P] where P=(Fo^2^+2Fc^2^)/3' 
_atom_sites_solution_primary      direct 
_atom_sites_solution_secondary    difmap 
_atom_sites_solution_hydrogens    geom 
_refine_ls_hydrogen_treatment     constr 
_refine_ls_extinction_method      none 
_refine_ls_extinction_coef        ? 
_refine_ls_number_reflns          7589 
_refine_ls_number_parameters      362 
_refine_ls_number_restraints      0 
_refine_ls_R_factor_all           0.0803 
_refine_ls_R_factor_gt            0.0505 
_refine_ls_wR_factor_ref          0.1090 
_refine_ls_wR_factor_gt           0.0940 
_refine_ls_goodness_of_fit_ref    1.080 
_refine_ls_restrained_S_all       1.080 
_refine_ls_shift/su_max           0.000 
_refine_ls_shift/su_mean          0.000 
 
loop_ 
 _atom_site_label 
 _atom_site_type_symbol 
 _atom_site_fract_x 
 _atom_site_fract_y 
 _atom_site_fract_z 
 _atom_site_U_iso_or_equiv 
 _atom_site_adp_type 
 _atom_site_occupancy 
 _atom_site_symmetry_multiplicity 
 _atom_site_calc_flag 
 _atom_site_refinement_flags 
 _atom_site_disorder_assembly 
 _atom_site_disorder_group 
P1 P 0.43048(4) 0.28561(4) 0.13059(3) 0.01493(12) Uani 1 1 d . . . 
P2 P 0.08209(4) 0.35260(4) 0.14262(3) 0.01678(12) Uani 1 1 d . . . 
C11 C 0.37365(16) 0.18414(14) 0.27410(10) 0.0147(4) Uani 1 1 d . . . 
C12 C 0.40178(18) 0.09174(15) 0.27302(11) 0.0191(4) Uani 1 1 d . . . 
H12 H 0.3518 0.0496 0.2444 0.023 Uiso 1 1 calc R . . 
C13 C 0.50416(19) 0.05832(16) 0.31396(11) 0.0229(5) Uani 1 1 d . . . 
H13 H 0.5237 -0.0055 0.3115 0.027 Uiso 1 1 calc R . . 
C14 C 0.57500(18) 0.11753(16) 0.35703(11) 0.0232(5) Uani 1 1 d . . . 
H14 H 0.6432 0.0943 0.3848 0.028 Uiso 1 1 calc R . . 
C15 C 0.54827(17) 0.21319(16) 0.36088(10) 0.0195(4) Uani 1 1 d . . . 
C16 C 0.62125(18) 0.27684(18) 0.40422(11) 0.0255(5) Uani 1 1 d . . . 
H16 H 0.6881 0.2543 0.4339 0.031 Uiso 1 1 calc R . . 
C17 C 0.5975(2) 0.36927(18) 0.40415(12) 0.0302(6) Uani 1 1 d . . . 
H17 H 0.6478 0.4106 0.4334 0.036 Uiso 1 1 calc R . . 
C18 C 0.4981(2) 0.40396(17) 0.36061(12) 0.0282(5) Uani 1 1 d . . . 
H18 H 0.4824 0.4688 0.3601 0.034 Uiso 1 1 calc R . . 
C19 C 0.44637(16) 0.24785(14) 0.31811(10) 0.0155(4) Uani 1 1 d . . . 
C10 C 0.42430(18) 0.34467(15) 0.31916(11) 0.0213(4) Uani 1 1 d . . . 
H10 H 0.3573 0.3688 0.2906 0.026 Uiso 1 1 calc R . . 
C21 C 0.24817(16) 0.17647(14) 0.15925(10) 0.0141(4) Uani 1 1 d . . . 
C22 C 0.31868(16) 0.19596(13) 0.10912(10) 0.0145(4) Uani 1 1 d . . . 
C23 C 0.29543(17) 0.14921(14) 0.04304(10) 0.0173(4) Uani 1 1 d . . . 
H23 H 0.3421 0.1615 0.0087 0.021 Uiso 1 1 calc R . . 
C24 C 0.20733(17) 0.08563(14) 0.02520(11) 0.0184(4) Uani 1 1 d . . . 
C27 C 0.1867(2) 0.03743(16) -0.04731(11) 0.0260(5) Uani 1 1 d . . . 
H27A H 0.1248 0.0687 -0.0795 0.039 Uiso 1 1 calc R . . 
H27B H 0.1664 -0.0278 -0.0412 0.039 Uiso 1 1 calc R . . 
H27C H 0.2555 0.0402 -0.0681 0.039 Uiso 1 1 calc R . . 
C26 C 0.16031(17) 0.11272(15) 0.14245(11) 0.0191(4) Uani 1 1 d . . . 
H26 H 0.1137 0.0994 0.1767 0.023 Uiso 1 1 calc R . . 
C25 C 0.14004(18) 0.06834(15) 0.07607(11) 0.0218(5) Uani 1 1 d . . . 
H25 H 0.0792 0.0255 0.0653 0.026 Uiso 1 1 calc R . . 
C31 C 0.17988(16) 0.24214(13) 0.26448(10) 0.0134(4) Uani 1 1 d . . . 
C32 C 0.08559(16) 0.29414(14) 0.23034(10) 0.0145(4) Uani 1 1 d . . . 
C33 C -0.00348(17) 0.30679(14) 0.26785(10) 0.0169(4) Uani 1 1 d . . . 
H33 H -0.0699 0.3372 0.2438 0.020 Uiso 1 1 calc R . . 
C34 C -0.00052(17) 0.27753(15) 0.33834(11) 0.0202(4) Uani 1 1 d . . . 
C35 C 0.09727(17) 0.23302(15) 0.37238(11) 0.0209(5) Uani 1 1 d . . . 
H35 H 0.1044 0.2154 0.4214 0.025 Uiso 1 1 calc R . . 
C37 C -0.09928(19) 0.29419(19) 0.37544(12) 0.0302(5) Uani 1 1 d . . . 
H37A H -0.1505 0.3397 0.3480 0.045 Uiso 1 1 calc R . . 
H37B H -0.0718 0.3181 0.4240 0.045 Uiso 1 1 calc R . . 
H37C H -0.1398 0.2355 0.3784 0.045 Uiso 1 1 calc R . . 
C36 C 0.18440(17) 0.21395(15) 0.33594(10) 0.0183(4) Uani 1 1 d . . . 
H36 H 0.2489 0.1810 0.3599 0.022 Uiso 1 1 calc R . . 
N N 0.27203(13) 0.21883(12) 0.22933(8) 0.0139(3) Uani 1 1 d . . . 
C41 C 0.55969(17) 0.21178(15) 0.15894(11) 0.0208(4) Uani 1 1 d . . . 
H41 H 0.5394 0.1663 0.1945 0.025 Uiso 1 1 calc R . . 
C42 C 0.65774(19) 0.26960(17) 0.20031(12) 0.0281(5) Uani 1 1 d . . . 
H42A H 0.6849 0.3129 0.1672 0.042 Uiso 1 1 calc R . . 
H42B H 0.7195 0.2280 0.2216 0.042 Uiso 1 1 calc R . . 
H42C H 0.6314 0.3047 0.2385 0.042 Uiso 1 1 calc R . . 
C43 C 0.59674(19) 0.15292(16) 0.09982(12) 0.0266(5) Uani 1 1 d . . . 
H43A H 0.5326 0.1159 0.0755 0.040 Uiso 1 1 calc R . . 
H43B H 0.6583 0.1113 0.1213 0.040 Uiso 1 1 calc R . . 
H43C H 0.6231 0.1939 0.0649 0.040 Uiso 1 1 calc R . . 
C44 C 0.44319(18) 0.32792(14) 0.03931(10) 0.0193(4) Uani 1 1 d . . . 
H44 H 0.4479 0.2734 0.0071 0.023 Uiso 1 1 calc R . . 
C45 C 0.3371(2) 0.38508(16) 0.00984(12) 0.0274(5) Uani 1 1 d . . . 
H45A H 0.3418 0.4081 -0.0383 0.041 Uiso 1 1 calc R . . 
H45B H 0.3318 0.4379 0.0419 0.041 Uiso 1 1 calc R . . 
H45C H 0.2699 0.3457 0.0071 0.041 Uiso 1 1 calc R . . 
C46 C 0.54936(19) 0.38818(15) 0.04329(11) 0.0230(5) Uani 1 1 d . . . 
H46A H 0.5483 0.4186 -0.0032 0.034 Uiso 1 1 calc R . . 
H46B H 0.6168 0.3488 0.0549 0.034 Uiso 1 1 calc R . . 
H46C H 0.5509 0.4356 0.0807 0.034 Uiso 1 1 calc R . . 
C51 C 0.09038(19) 0.47786(15) 0.17089(12) 0.0235(5) Uani 1 1 d . . . 
H51 H 0.0854 0.5150 0.1257 0.028 Uiso 1 1 calc R . . 
C52 C 0.2079(2) 0.49689(17) 0.21500(13) 0.0312(5) Uani 1 1 d . . . 
H52A H 0.2653 0.4682 0.1913 0.047 Uiso 1 1 calc R . . 
H52B H 0.2129 0.4705 0.2633 0.047 Uiso 1 1 calc R . . 
H52C H 0.2207 0.5642 0.2187 0.047 Uiso 1 1 calc R . . 
C53 C 0.0008(2) 0.51783(17) 0.20992(14) 0.0344(6) Uani 1 1 d . . . 
H53A H 0.0121 0.5851 0.2160 0.052 Uiso 1 1 calc R . . 
H53B H 0.0073 0.4883 0.2572 0.052 Uiso 1 1 calc R . . 
H53C H -0.0745 0.5057 0.1816 0.052 Uiso 1 1 calc R . . 
C54 C -0.07001(17) 0.34087(16) 0.10007(11) 0.0219(5) Uani 1 1 d . . . 
H54 H -0.1180 0.3647 0.1341 0.026 Uiso 1 1 calc R . . 
C55 C -0.0975(2) 0.23827(17) 0.08415(12) 0.0292(5) Uani 1 1 d . . . 
H55A H -0.1756 0.2325 0.0584 0.044 Uiso 1 1 calc R . . 
H55B H -0.0885 0.2035 0.1294 0.044 Uiso 1 1 calc R . . 
H55C H -0.0459 0.2130 0.0544 0.044 Uiso 1 1 calc R . . 
C56 C -0.0933(2) 0.39885(18) 0.03083(12) 0.0322(6) Uani 1 1 d . . . 
H56A H -0.0418 0.3795 -0.0010 0.048 Uiso 1 1 calc R . . 
H56B H -0.0814 0.4649 0.0428 0.048 Uiso 1 1 calc R . . 
H56C H -0.1717 0.3892 0.0065 0.048 Uiso 1 1 calc R . . 
 
loop_ 
 _atom_site_aniso_label 
 _atom_site_aniso_U_11 
 _atom_site_aniso_U_22 
 _atom_site_aniso_U_33 
 _atom_site_aniso_U_23 
 _atom_site_aniso_U_13 
 _atom_site_aniso_U_12 
P1 0.0168(3) 0.0154(3) 0.0133(2) -0.0004(2) 0.00467(19) -0.0037(2) 
P2 0.0144(3) 0.0209(3) 0.0155(2) 0.0044(2) 0.00395(19) 0.0012(2) 
C11 0.0130(10) 0.0193(10) 0.0130(9) 0.0032(7) 0.0056(7) 0.0023(8) 
C12 0.0211(11) 0.0194(11) 0.0186(10) 0.0029(8) 0.0081(8) -0.0005(9) 
C13 0.0255(12) 0.0224(12) 0.0226(11) 0.0070(9) 0.0092(9) 0.0084(9) 
C14 0.0186(11) 0.0360(13) 0.0159(10) 0.0095(9) 0.0053(8) 0.0101(10) 
C15 0.0150(10) 0.0321(12) 0.0128(9) 0.0029(9) 0.0062(8) 0.0021(9) 
C16 0.0159(10) 0.0452(15) 0.0152(10) 0.0001(10) 0.0026(8) -0.0014(10) 
C17 0.0251(12) 0.0417(15) 0.0232(11) -0.0110(10) 0.0028(9) -0.0103(11) 
C18 0.0307(13) 0.0262(13) 0.0277(12) -0.0077(10) 0.0054(10) -0.0020(10) 
C19 0.0133(10) 0.0215(10) 0.0128(9) 0.0006(8) 0.0050(7) 0.0007(8) 
C10 0.0195(11) 0.0237(11) 0.0209(10) -0.0031(9) 0.0038(8) 0.0021(9) 
C21 0.0124(9) 0.0159(10) 0.0143(9) 0.0002(7) 0.0028(7) 0.0008(8) 
C22 0.0139(10) 0.0134(10) 0.0166(9) 0.0005(7) 0.0034(7) -0.0005(8) 
C23 0.0183(10) 0.0172(10) 0.0171(9) 0.0009(8) 0.0050(8) 0.0008(8) 
C24 0.0176(10) 0.0162(10) 0.0200(10) -0.0022(8) 0.0000(8) 0.0008(8) 
C27 0.0274(12) 0.0249(12) 0.0248(11) -0.0080(9) 0.0026(9) -0.0035(10) 
C26 0.0165(10) 0.0212(11) 0.0209(10) 0.0008(8) 0.0067(8) -0.0023(9) 
C25 0.0183(11) 0.0200(11) 0.0263(11) -0.0036(9) 0.0020(9) -0.0054(9) 
C31 0.0113(9) 0.0146(10) 0.0148(9) -0.0002(7) 0.0036(7) -0.0028(7) 
C32 0.0148(10) 0.0147(10) 0.0141(9) 0.0006(7) 0.0029(7) -0.0010(8) 
C33 0.0132(10) 0.0194(11) 0.0183(10) 0.0003(8) 0.0040(8) 0.0016(8) 
C34 0.0179(10) 0.0242(11) 0.0195(10) -0.0017(9) 0.0060(8) -0.0013(9) 
C35 0.0188(11) 0.0304(13) 0.0141(9) 0.0015(8) 0.0049(8) -0.0015(9) 
C37 0.0228(12) 0.0465(16) 0.0245(11) 0.0033(11) 0.0126(9) 0.0067(11) 
C36 0.0147(10) 0.0245(11) 0.0153(9) 0.0025(8) 0.0019(7) 0.0004(9) 
N 0.0113(8) 0.0183(9) 0.0120(7) 0.0003(7) 0.0018(6) 0.0010(7) 
C41 0.0171(10) 0.0243(11) 0.0222(10) 0.0045(9) 0.0064(8) -0.0020(9) 
C42 0.0197(11) 0.0408(15) 0.0238(11) 0.0046(10) 0.0038(9) -0.0046(10) 
C43 0.0248(12) 0.0230(12) 0.0344(12) 0.0017(10) 0.0119(10) 0.0022(10) 
C44 0.0294(12) 0.0159(10) 0.0137(9) 0.0003(8) 0.0066(8) -0.0049(9) 
C45 0.0332(13) 0.0256(12) 0.0205(11) 0.0053(9) -0.0029(9) -0.0059(10) 
C46 0.0325(13) 0.0197(11) 0.0193(10) 0.0007(8) 0.0115(9) -0.0071(10) 
C51 0.0241(12) 0.0212(11) 0.0251(11) 0.0091(9) 0.0039(9) 0.0027(9) 
C52 0.0267(13) 0.0231(13) 0.0427(14) -0.0019(11) 0.0032(11) -0.0037(10) 
C53 0.0306(14) 0.0224(13) 0.0512(16) -0.0006(11) 0.0105(12) 0.0069(10) 
C54 0.0159(10) 0.0316(13) 0.0179(10) 0.0045(9) 0.0019(8) 0.0007(9) 
C55 0.0235(12) 0.0363(14) 0.0253(11) 0.0029(10) -0.0019(9) -0.0062(10) 
C56 0.0265(13) 0.0420(15) 0.0258(12) 0.0102(11) -0.0016(10) 0.0008(11) 
 
_geom_special_details 
; 
 All esds (except the esd in the dihedral angle between two l.s. planes) 
 are estimated using the full covariance matrix.  The cell esds are taken 
 into account individually in the estimation of esds in distances, angles 
 and torsion angles; correlations between esds in cell parameters are only 
 used when they are defined by crystal symmetry.  An approximate (isotropic) 
 treatment of cell esds is used for estimating esds involving l.s. planes. 
; 
 
loop_ 
 _geom_bond_atom_site_label_1 
 _geom_bond_atom_site_label_2 
 _geom_bond_distance 
 _geom_bond_site_symmetry_2 
 _geom_bond_publ_flag 
P1 C22 1.852(2) . ? 
P1 C44 1.862(2) . ? 
P1 C41 1.877(2) . ? 
P2 C32 1.8526(19) . ? 
P2 C54 1.867(2) . ? 
P2 C51 1.874(2) . ? 
C11 C12 1.371(3) . ? 
C11 C19 1.424(3) . ? 
C11 N 1.442(2) . ? 
C12 C13 1.413(3) . ? 
C12 H12 0.9500 . ? 
C13 C14 1.364(3) . ? 
C13 H13 0.9500 . ? 
C14 C15 1.416(3) . ? 
C14 H14 0.9500 . ? 
C15 C16 1.420(3) . ? 
C15 C19 1.429(3) . ? 
C16 C17 1.358(3) . ? 
C16 H16 0.9500 . ? 
C17 C18 1.413(3) . ? 
C17 H17 0.9500 . ? 
C18 C10 1.369(3) . ? 
C18 H18 0.9500 . ? 
C19 C10 1.417(3) . ? 
C10 H10 0.9500 . ? 
C21 C26 1.390(3) . ? 
C21 C22 1.410(3) . ? 
C21 N 1.439(2) . ? 
C22 C23 1.401(3) . ? 
C23 C24 1.393(3) . ? 
C23 H23 0.9500 . ? 
C24 C25 1.388(3) . ? 
C24 C27 1.515(3) . ? 
C27 H27A 0.9800 . ? 
C27 H27B 0.9800 . ? 
C27 H27C 0.9800 . ? 
C26 C25 1.389(3) . ? 
C26 H26 0.9500 . ? 
C25 H25 0.9500 . ? 
C31 C36 1.402(3) . ? 
C31 C32 1.412(3) . ? 
C31 N 1.432(2) . ? 
C32 C33 1.400(3) . ? 
C33 C34 1.392(3) . ? 
C33 H33 0.9500 . ? 
C34 C35 1.389(3) . ? 
C34 C37 1.505(3) . ? 
C35 C36 1.383(3) . ? 
C35 H35 0.9500 . ? 
C37 H37A 0.9800 . ? 
C37 H37B 0.9800 . ? 
C37 H37C 0.9800 . ? 
C36 H36 0.9500 . ? 
C41 C43 1.531(3) . ? 
C41 C42 1.535(3) . ? 
C41 H41 1.0000 . ? 
C42 H42A 0.9800 . ? 
C42 H42B 0.9800 . ? 
C42 H42C 0.9800 . ? 
C43 H43A 0.9800 . ? 
C43 H43B 0.9800 . ? 
C43 H43C 0.9800 . ? 
C44 C46 1.533(3) . ? 
C44 C45 1.534(3) . ? 
C44 H44 1.0000 . ? 
C45 H45A 0.9800 . ? 
C45 H45B 0.9800 . ? 
C45 H45C 0.9800 . ? 
C46 H46A 0.9800 . ? 
C46 H46B 0.9800 . ? 
C46 H46C 0.9800 . ? 
C51 C53 1.525(3) . ? 
C51 C52 1.528(3) . ? 
C51 H51 1.0000 . ? 
C52 H52A 0.9800 . ? 
C52 H52B 0.9800 . ? 
C52 H52C 0.9800 . ? 
C53 H53A 0.9800 . ? 
C53 H53B 0.9800 . ? 
C53 H53C 0.9800 . ? 
C54 C55 1.528(3) . ? 
C54 C56 1.534(3) . ? 
C54 H54 1.0000 . ? 
C55 H55A 0.9800 . ? 
C55 H55B 0.9800 . ? 
C55 H55C 0.9800 . ? 
C56 H56A 0.9800 . ? 
C56 H56B 0.9800 . ? 
C56 H56C 0.9800 . ? 
 
loop_ 
 _geom_angle_atom_site_label_1 
 _geom_angle_atom_site_label_2 
 _geom_angle_atom_site_label_3 
 _geom_angle 
 _geom_angle_site_symmetry_1 
 _geom_angle_site_symmetry_3 
 _geom_angle_publ_flag 
C22 P1 C44 101.70(9) . . ? 
C22 P1 C41 101.52(9) . . ? 
C44 P1 C41 104.21(9) . . ? 
C32 P2 C54 101.85(9) . . ? 
C32 P2 C51 100.87(9) . . ? 
C54 P2 C51 101.91(10) . . ? 
C12 C11 C19 120.26(18) . . ? 
C12 C11 N 120.71(18) . . ? 
C19 C11 N 119.01(17) . . ? 
C11 C12 C13 120.9(2) . . ? 
C11 C12 H12 119.6 . . ? 
C13 C12 H12 119.6 . . ? 
C14 C13 C12 120.1(2) . . ? 
C14 C13 H13 119.9 . . ? 
C12 C13 H13 119.9 . . ? 
C13 C14 C15 120.9(2) . . ? 
C13 C14 H14 119.6 . . ? 
C15 C14 H14 119.6 . . ? 
C14 C15 C16 122.2(2) . . ? 
C14 C15 C19 119.23(19) . . ? 
C16 C15 C19 118.6(2) . . ? 
C17 C16 C15 121.4(2) . . ? 
C17 C16 H16 119.3 . . ? 
C15 C16 H16 119.3 . . ? 
C16 C17 C18 120.1(2) . . ? 
C16 C17 H17 120.0 . . ? 
C18 C17 H17 120.0 . . ? 
C10 C18 C17 120.4(2) . . ? 
C10 C18 H18 119.8 . . ? 
C17 C18 H18 119.8 . . ? 
C10 C19 C11 122.84(18) . . ? 
C10 C19 C15 118.53(19) . . ? 
C11 C19 C15 118.58(19) . . ? 
C18 C10 C19 121.0(2) . . ? 
C18 C10 H10 119.5 . . ? 
C19 C10 H10 119.5 . . ? 
C26 C21 C22 120.15(18) . . ? 
C26 C21 N 120.29(17) . . ? 
C22 C21 N 119.45(17) . . ? 
C23 C22 C21 117.23(18) . . ? 
C23 C22 P1 123.20(15) . . ? 
C21 C22 P1 119.47(14) . . ? 
C24 C23 C22 123.34(19) . . ? 
C24 C23 H23 118.3 . . ? 
C22 C23 H23 118.3 . . ? 
C25 C24 C23 117.61(18) . . ? 
C25 C24 C27 121.68(19) . . ? 
C23 C24 C27 120.70(19) . . ? 
C24 C27 H27A 109.5 . . ? 
C24 C27 H27B 109.5 . . ? 
H27A C27 H27B 109.5 . . ? 
C24 C27 H27C 109.5 . . ? 
H27A C27 H27C 109.5 . . ? 
H27B C27 H27C 109.5 . . ? 
C25 C26 C21 120.62(19) . . ? 
C25 C26 H26 119.7 . . ? 
C21 C26 H26 119.7 . . ? 
C24 C25 C26 121.05(19) . . ? 
C24 C25 H25 119.5 . . ? 
C26 C25 H25 119.5 . . ? 
C36 C31 C32 118.70(17) . . ? 
C36 C31 N 118.85(17) . . ? 
C32 C31 N 122.44(17) . . ? 
C33 C32 C31 117.51(17) . . ? 
C33 C32 P2 120.01(15) . . ? 
C31 C32 P2 122.30(14) . . ? 
C34 C33 C32 123.89(19) . . ? 
C34 C33 H33 118.1 . . ? 
C32 C33 H33 118.1 . . ? 
C35 C34 C33 117.01(18) . . ? 
C35 C34 C37 122.06(19) . . ? 
C33 C34 C37 120.93(19) . . ? 
C36 C35 C34 120.99(19) . . ? 
C36 C35 H35 119.5 . . ? 
C34 C35 H35 119.5 . . ? 
C34 C37 H37A 109.5 . . ? 
C34 C37 H37B 109.5 . . ? 
H37A C37 H37B 109.5 . . ? 
C34 C37 H37C 109.5 . . ? 
H37A C37 H37C 109.5 . . ? 
H37B C37 H37C 109.5 . . ? 
C35 C36 C31 121.56(19) . . ? 
C35 C36 H36 119.2 . . ? 
C31 C36 H36 119.2 . . ? 
C31 N C21 119.03(15) . . ? 
C31 N C11 116.93(15) . . ? 
C21 N C11 113.55(15) . . ? 
C43 C41 C42 111.84(18) . . ? 
C43 C41 P1 116.08(15) . . ? 
C42 C41 P1 111.03(16) . . ? 
C43 C41 H41 105.7 . . ? 
C42 C41 H41 105.7 . . ? 
P1 C41 H41 105.7 . . ? 
C41 C42 H42A 109.5 . . ? 
C41 C42 H42B 109.5 . . ? 
H42A C42 H42B 109.5 . . ? 
C41 C42 H42C 109.5 . . ? 
H42A C42 H42C 109.5 . . ? 
H42B C42 H42C 109.5 . . ? 
C41 C43 H43A 109.5 . . ? 
C41 C43 H43B 109.5 . . ? 
H43A C43 H43B 109.5 . . ? 
C41 C43 H43C 109.5 . . ? 
H43A C43 H43C 109.5 . . ? 
H43B C43 H43C 109.5 . . ? 
C46 C44 C45 110.22(17) . . ? 
C46 C44 P1 110.32(14) . . ? 
C45 C44 P1 107.93(14) . . ? 
C46 C44 H44 109.4 . . ? 
C45 C44 H44 109.4 . . ? 
P1 C44 H44 109.4 . . ? 
C44 C45 H45A 109.5 . . ? 
C44 C45 H45B 109.5 . . ? 
H45A C45 H45B 109.5 . . ? 
C44 C45 H45C 109.5 . . ? 
H45A C45 H45C 109.5 . . ? 
H45B C45 H45C 109.5 . . ? 
C44 C46 H46A 109.5 . . ? 
C44 C46 H46B 109.5 . . ? 
H46A C46 H46B 109.5 . . ? 
C44 C46 H46C 109.5 . . ? 
H46A C46 H46C 109.5 . . ? 
H46B C46 H46C 109.5 . . ? 
C53 C51 C52 109.4(2) . . ? 
C53 C51 P2 119.60(16) . . ? 
C52 C51 P2 108.85(15) . . ? 
C53 C51 H51 106.0 . . ? 
C52 C51 H51 106.0 . . ? 
P2 C51 H51 106.0 . . ? 
C51 C52 H52A 109.5 . . ? 
C51 C52 H52B 109.5 . . ? 
H52A C52 H52B 109.5 . . ? 
C51 C52 H52C 109.5 . . ? 
H52A C52 H52C 109.5 . . ? 
H52B C52 H52C 109.5 . . ? 
C51 C53 H53A 109.5 . . ? 
C51 C53 H53B 109.5 . . ? 
H53A C53 H53B 109.5 . . ? 
C51 C53 H53C 109.5 . . ? 
H53A C53 H53C 109.5 . . ? 
H53B C53 H53C 109.5 . . ? 
C55 C54 C56 110.87(18) . . ? 
C55 C54 P2 109.36(15) . . ? 
C56 C54 P2 109.33(15) . . ? 
C55 C54 H54 109.1 . . ? 
C56 C54 H54 109.1 . . ? 
P2 C54 H54 109.1 . . ? 
C54 C55 H55A 109.5 . . ? 
C54 C55 H55B 109.5 . . ? 
H55A C55 H55B 109.5 . . ? 
C54 C55 H55C 109.5 . . ? 
H55A C55 H55C 109.5 . . ? 
H55B C55 H55C 109.5 . . ? 
C54 C56 H56A 109.5 . . ? 
C54 C56 H56B 109.5 . . ? 
H56A C56 H56B 109.5 . . ? 
C54 C56 H56C 109.5 . . ? 
H56A C56 H56C 109.5 . . ? 
H56B C56 H56C 109.5 . . ? 
 
_diffrn_measured_fraction_theta_max    0.923 
_diffrn_reflns_theta_full              25.00 
_diffrn_measured_fraction_theta_full   1.000 
_refine_diff_density_max    0.368 
_refine_diff_density_min   -0.416 
_refine_diff_density_rms    0.065 
_iucr_refine_instructions_details
;
TITL SPV1RC in P2(1)/c
CELL 0.71073  12.0262  14.3646  18.9076  90.000 100.514  90.000
ZERR    4.00   0.0009   0.0011   0.0013   0.000   0.002   0.000
LATT  1
SYMM -X, 0.5+Y, 0.5-Z
SFAC C H N P
UNIT 144 188 4 8
LIST 6 ! automatically inserted. Change 6 to 4 for CHECKCIF!!
TEMP -150.000
SIZE 0.108 0.223 0.267
 
L.S. 4
BOND $H
FMAP 2
PLAN 20
ACTA 50
 
WGHT    0.024800    2.820300
FVAR       0.10451
MOLE   1
P1    4    0.430479    0.285613    0.130591    11.00000    0.01678    0.01542 =
         0.01333   -0.00043    0.00467   -0.00368
 
P2    4    0.082093    0.352597    0.142623    11.00000    0.01444    0.02089 =
         0.01548    0.00444    0.00395    0.00121
C11   1    0.373650    0.184144    0.274097    11.00000    0.01304    0.01929 =
         0.01298    0.00317    0.00559    0.00234
C12   1    0.401775    0.091740    0.273022    11.00000    0.02111    0.01943 =
         0.01855    0.00294    0.00815   -0.00049
AFIX  43
H12   2    0.351777    0.049597    0.244377    11.00000   -1.20000
AFIX   0
C13   1    0.504156    0.058320    0.313957    11.00000    0.02548    0.02245 =
         0.02263    0.00699    0.00920    0.00835
AFIX  43
H13   2    0.523655   -0.005530    0.311457    11.00000   -1.20000
AFIX   0
C14   1    0.574996    0.117532    0.357029    11.00000    0.01858    0.03603 =
         0.01588    0.00949    0.00530    0.01010
AFIX  43
H14   2    0.643176    0.094308    0.384822    11.00000   -1.20000
AFIX   0
C15   1    0.548268    0.213187    0.360876    11.00000    0.01496    0.03210 =
         0.01281    0.00295    0.00620    0.00213
C16   1    0.621247    0.276842    0.404220    11.00000    0.01594    0.04524 =
         0.01523    0.00008    0.00258   -0.00143
AFIX  43
H16   2    0.688140    0.254292    0.433915    11.00000   -1.20000
AFIX   0
C17   1    0.597500    0.369271    0.404148    11.00000    0.02507    0.04173 =
         0.02316   -0.01097    0.00281   -0.01029
AFIX  43
H17   2    0.647777    0.410639    0.433396    11.00000   -1.20000
AFIX   0
C18   1    0.498088    0.403957    0.360615    11.00000    0.03072    0.02619 =
         0.02765   -0.00775    0.00538   -0.00196
AFIX  43
H18   2    0.482366    0.468789    0.360115    11.00000   -1.20000
AFIX   0
C19   1    0.446367    0.247850    0.318111    11.00000    0.01330    0.02148 =
         0.01277    0.00061    0.00502    0.00069
C10   1    0.424305    0.344666    0.319155    11.00000    0.01952    0.02367 =
         0.02087   -0.00305    0.00380    0.00209
AFIX  43
H10   2    0.357259    0.368813    0.290638    11.00000   -1.20000
AFIX   0
C21   1    0.248173    0.176473    0.159248    11.00000    0.01238    0.01586 =
         0.01431    0.00016    0.00275    0.00078
C22   1    0.318681    0.195965    0.109115    11.00000    0.01389    0.01341 =
         0.01656    0.00048    0.00342   -0.00050
C23   1    0.295426    0.149215    0.043042    11.00000    0.01830    0.01722 =
         0.01710    0.00090    0.00498    0.00077
AFIX  43
H23   2    0.342119    0.161503    0.008653    11.00000   -1.20000
AFIX   0
C24   1    0.207331    0.085634    0.025199    11.00000    0.01755    0.01615 =
         0.02004   -0.00218   -0.00005    0.00079
C27   1    0.186685    0.037433   -0.047312    11.00000    0.02744    0.02494 =
         0.02482   -0.00803    0.00260   -0.00354
AFIX 137
H27A  2    0.124784    0.068651   -0.079505    11.00000   -1.50000
H27B  2    0.166404   -0.027772   -0.041207    11.00000   -1.50000
H27C  2    0.255515    0.040249   -0.068117    11.00000   -1.50000
AFIX   0
C26   1    0.160314    0.112719    0.142454    11.00000    0.01646    0.02120 =
         0.02088    0.00075    0.00673   -0.00227
AFIX  43
H26   2    0.113712    0.099390    0.176701    11.00000   -1.20000
AFIX   0
C25   1    0.140044    0.068335    0.076068    11.00000    0.01833    0.02000 =
         0.02632   -0.00361    0.00200   -0.00542
AFIX  43
H25   2    0.079154    0.025461    0.065323    11.00000   -1.20000
AFIX   0
C31   1    0.179883    0.242145    0.264484    11.00000    0.01127    0.01460 =
         0.01483   -0.00023    0.00365   -0.00284
C32   1    0.085591    0.294138    0.230337    11.00000    0.01476    0.01471 =
         0.01409    0.00063    0.00292   -0.00102
C33   1   -0.003483    0.306792    0.267848    11.00000    0.01324    0.01943 =
         0.01835    0.00027    0.00404    0.00164
AFIX  43
H33   2   -0.069872    0.337154    0.243752    11.00000   -1.20000
AFIX   0
C34   1   -0.000521    0.277527    0.338340    11.00000    0.01794    0.02422 =
         0.01948   -0.00171    0.00597   -0.00127
C35   1    0.097272    0.233016    0.372378    11.00000    0.01877    0.03036 =
         0.01413    0.00146    0.00487   -0.00153
AFIX  43
H35   2    0.104380    0.215416    0.421431    11.00000   -1.20000
AFIX   0
C37   1   -0.099285    0.294189    0.375443    11.00000    0.02283    0.04649 =
         0.02450    0.00333    0.01259    0.00666
AFIX 137
H37A  2   -0.150537    0.339750    0.348022    11.00000   -1.50000
H37B  2   -0.071839    0.318127    0.424028    11.00000   -1.50000
H37C  2   -0.139800    0.235543    0.378443    11.00000   -1.50000
AFIX   0
C36   1    0.184404    0.213948    0.335935    11.00000    0.01469    0.02453 =
         0.01528    0.00245    0.00188    0.00039
AFIX  43
H36   2    0.248868    0.180956    0.359880    11.00000   -1.20000
AFIX   0
N     3    0.272034    0.218833    0.229330    11.00000    0.01134    0.01833 =
         0.01204    0.00034    0.00184    0.00103
C41   1    0.559694    0.211775    0.158942    11.00000    0.01715    0.02427 =
         0.02216    0.00455    0.00640   -0.00196
AFIX  13
H41   2    0.539360    0.166286    0.194545    11.00000   -1.20000
AFIX   0
C42   1    0.657742    0.269596    0.200310    11.00000    0.01969    0.04082 =
         0.02376    0.00460    0.00383   -0.00459
AFIX 137
H42A  2    0.684928    0.312941    0.167229    11.00000   -1.50000
H42B  2    0.719457    0.228022    0.221590    11.00000   -1.50000
H42C  2    0.631449    0.304747    0.238525    11.00000   -1.50000
AFIX   0
C43   1    0.596739    0.152917    0.099825    11.00000    0.02476    0.02298 =
         0.03441    0.00169    0.01188    0.00218
AFIX 137
H43A  2    0.532569    0.115907    0.075481    11.00000   -1.50000
H43B  2    0.658250    0.111253    0.121274    11.00000   -1.50000
H43C  2    0.623107    0.193919    0.064882    11.00000   -1.50000
AFIX   0
C44   1    0.443186    0.327916    0.039315    11.00000    0.02936    0.01589 =
         0.01365    0.00025    0.00662   -0.00492
AFIX  13
H44   2    0.447851    0.273429    0.007066    11.00000   -1.20000
AFIX   0
C45   1    0.337090    0.385079    0.009841    11.00000    0.03315    0.02563 =
         0.02047    0.00533   -0.00288   -0.00589
AFIX 137
H45A  2    0.341786    0.408146   -0.038304    11.00000   -1.50000
H45B  2    0.331813    0.437901    0.041865    11.00000   -1.50000
H45C  2    0.269895    0.345708    0.007134    11.00000   -1.50000
AFIX   0
C46   1    0.549363    0.388176    0.043294    11.00000    0.03252    0.01966 =
         0.01927    0.00074    0.01154   -0.00714
AFIX 137
H46A  2    0.548292    0.418604   -0.003216    11.00000   -1.50000
H46B  2    0.616809    0.348842    0.054925    11.00000   -1.50000
H46C  2    0.550862    0.435601    0.080715    11.00000   -1.50000
AFIX   0
C51   1    0.090379    0.477858    0.170887    11.00000    0.02408    0.02125 =
         0.02508    0.00907    0.00391    0.00273
AFIX  13
H51   2    0.085429    0.514961    0.125669    11.00000   -1.20000
AFIX   0
C52   1    0.207851    0.496893    0.214996    11.00000    0.02670    0.02309 =
         0.04274   -0.00190    0.00317   -0.00368
AFIX 137
H52A  2    0.265257    0.468184    0.191296    11.00000   -1.50000
H52B  2    0.212943    0.470468    0.263266    11.00000   -1.50000
H52C  2    0.220672    0.564232    0.218708    11.00000   -1.50000
AFIX   0
C53   1    0.000813    0.517828    0.209924    11.00000    0.03056    0.02241 =
         0.05123   -0.00059    0.01047    0.00687
AFIX 137
H53A  2    0.012105    0.585122    0.216015    11.00000   -1.50000
H53B  2    0.007289    0.488307    0.257227    11.00000   -1.50000
H53C  2   -0.074522    0.505746    0.181620    11.00000   -1.50000
AFIX   0
C54   1   -0.070010    0.340872    0.100071    11.00000    0.01593    0.03162 =
         0.01786    0.00451    0.00194    0.00066
AFIX  13
H54   2   -0.118001    0.364661    0.134122    11.00000   -1.20000
AFIX   0
C55   1   -0.097480    0.238269    0.084148    11.00000    0.02354    0.03628 =
         0.02529    0.00289   -0.00193   -0.00624
AFIX 137
H55A  2   -0.175637    0.232451    0.058406    11.00000   -1.50000
H55B  2   -0.088506    0.203543    0.129449    11.00000   -1.50000
H55C  2   -0.045910    0.213022    0.054378    11.00000   -1.50000
AFIX   0
C56   1   -0.093319    0.398848    0.030831    11.00000    0.02646    0.04199 =
         0.02578    0.01019   -0.00165    0.00079
AFIX 137
H56A  2   -0.041787    0.379518   -0.001033    11.00000   -1.50000
H56B  2   -0.081392    0.464922    0.042750    11.00000   -1.50000
H56C  2   -0.171672    0.389150    0.006532    11.00000   -1.50000
MOLE   2
PART 2
 
PART 0
HKLF 4
 
REM  SPV1RC in P2(1)/c
REM R1 =  0.0505 for   5602 Fo > 4sig(Fo)  and  0.0803 for all   7589 data
REM    362 parameters refined using      0 restraints
 
END  
     
WGHT      0.0248      2.8204 
REM Highest difference peak  0.368,  deepest hole -0.416,  1-sigma level  0.065
Q1    1   0.3642  0.2377  0.1187  11.00000  0.05    0.37
Q2    1   0.4188  0.3322  0.1707  11.00000  0.05    0.36
Q3    1   0.0834  0.3204  0.1928  11.00000  0.05    0.36
Q4    1   0.5419  0.2804  0.1485  11.00000  0.05    0.35
Q5    1   0.0720  0.4233  0.1674  11.00000  0.05    0.34
Q6    1   0.4398  0.3119  0.0815  11.00000  0.05    0.33
Q7    1   0.1255  0.1052  0.1021  11.00000  0.05    0.32
Q8    1   0.3882  0.2184  0.3054  11.00000  0.05    0.30
Q9    1  -0.0026  0.3285  0.1114  11.00000  0.05    0.30
Q10   1   0.4945  0.2430  0.1569  11.00000  0.05    0.30
Q11   1   0.3583  0.2917  0.1701  11.00000  0.05    0.29
Q12   1   0.3146  0.1858  0.2599  11.00000  0.05    0.29
Q13   1   0.1408  0.2944  0.2480  11.00000  0.05    0.28
Q14   1   0.3022  0.1708  0.1443  11.00000  0.05    0.28
Q15   1   0.2146  0.1339  0.1497  11.00000  0.05    0.28
Q16   1   0.5053  0.2399  0.1154  11.00000  0.05    0.28
Q17   1   0.2585  0.2099  0.1893  11.00000  0.05    0.27
Q18   1   0.2462  0.1274  0.0343  11.00000  0.05    0.27
Q19   1   0.0781  0.4988  0.1400  11.00000  0.05    0.26
Q20   1   0.4006  0.1446  0.2514  11.00000  0.05    0.26

;


 
data_sean 
 
_audit_creation_method            SHELXL-97 
_chemical_name_systematic 
; 
 ? 
; 
_chemical_name_common             ? 
_chemical_melting_point           ? 
_chemical_formula_moiety          ? 
_chemical_formula_sum 
 'C33 H47 N P2' 
_chemical_formula_weight          519.66 
 
loop_ 
 _atom_type_symbol 
 _atom_type_description 
 _atom_type_scat_dispersion_real 
 _atom_type_scat_dispersion_imag 
 _atom_type_scat_source 
 'C'  'C'   0.0033   0.0016 
 'International Tables Vol C Tables 4.2.6.8 and 6.1.1.4' 
 'H'  'H'   0.0000   0.0000 
 'International Tables Vol C Tables 4.2.6.8 and 6.1.1.4' 
 'N'  'N'   0.0061   0.0033 
 'International Tables Vol C Tables 4.2.6.8 and 6.1.1.4' 
 'P'  'P'   0.1023   0.0942 
 'International Tables Vol C Tables 4.2.6.8 and 6.1.1.4' 
 
_symmetry_cell_setting            'monoclinic' 
_symmetry_space_group_name_H-M    'P2(1)/c' 
 
loop_ 
 _symmetry_equiv_pos_as_xyz 
 'x, y, z' 
 '-x, y+1/2, -z+1/2' 
 '-x, -y, -z' 
 'x, -y-1/2, z-1/2' 
 
_cell_length_a                    16.8530(14) 
_cell_length_b                    14.0257(12) 
_cell_length_c                    18.4615(18) 
_cell_angle_alpha                 90.00 
_cell_angle_beta                  136.967(5) 
_cell_angle_gamma                 90.00 
_cell_volume                      2977.9(5) 
_cell_formula_units_Z             4 
_cell_measurement_temperature     120(2) 
_cell_measurement_reflns_used     2397 
_cell_measurement_theta_min       2.28 
_cell_measurement_theta_max       22.90 
 
_exptl_crystal_description        'block' 
_exptl_crystal_colour             ? 
_exptl_crystal_size_max           0.16 
_exptl_crystal_size_mid           0.13 
_exptl_crystal_size_min           0.04 
_exptl_crystal_density_meas       ? 
_exptl_crystal_density_diffrn     1.159 
_exptl_crystal_density_method     'not measured' 
_exptl_crystal_F_000              1128 
_exptl_absorpt_coefficient_mu     0.168 
_exptl_absorpt_correction_type    'multi-scan' 
_exptl_absorpt_correction_T_min   0.9163 
_exptl_absorpt_correction_T_max   1.0000 
_exptl_absorpt_process_details    'Bruker AXS area detector scaling and absorption correction' 
 
_exptl_special_details 
; 
 ? 
; 
 
_diffrn_ambient_temperature       120(2) 
_diffrn_radiation_wavelength      0.71073 
_diffrn_radiation_type            MoK\a 
_diffrn_radiation_source          'fine-focus sealed tube' 
_diffrn_radiation_monochromator   graphite 
_diffrn_measurement_device_type   'Bruker APEX-II' 
_diffrn_measurement_method        ? 
_diffrn_detector_area_resol_mean  ? 
_diffrn_standards_number          ? 
_diffrn_standards_interval_count  ? 
_diffrn_standards_interval_time   ? 
_diffrn_standards_decay_%         ? 
_diffrn_reflns_number             36762 
_diffrn_reflns_av_R_equivalents   0.1169 
_diffrn_reflns_av_sigmaI/netI     0.0802 
_diffrn_reflns_limit_h_min        -20 
_diffrn_reflns_limit_h_max        19 
_diffrn_reflns_limit_k_min        -16 
_diffrn_reflns_limit_k_max        16 
_diffrn_reflns_limit_l_min        -21 
_diffrn_reflns_limit_l_max        21 
_diffrn_reflns_theta_min          1.77 
_diffrn_reflns_theta_max          25.00 
_reflns_number_total              5247 
_reflns_number_gt                 3392 
_reflns_threshold_expression      >2sigma(I) 
 
_computing_data_collection        ? 
_computing_cell_refinement        ? 
_computing_data_reduction         ? 
_computing_structure_solution     'SHELXS-97 (Sheldrick, 1990)' 
_computing_structure_refinement   'SHELXL-97 (Sheldrick, 1997)' 
_computing_molecular_graphics     ? 
_computing_publication_material   ? 
 
_refine_special_details 
; 
 Refinement of F^2^ against ALL reflections.  The weighted R-factor wR and 
 goodness of fit S are based on F^2^, conventional R-factors R are based 
 on F, with F set to zero for negative F^2^. The threshold expression of 
 F^2^ > 2sigma(F^2^) is used only for calculating R-factors(gt) etc. and is 
 not relevant to the choice of reflections for refinement.  R-factors based 
 on F^2^ are statistically about twice as large as those based on F, and R- 
 factors based on ALL data will be even larger. 
; 
 
_refine_ls_structure_factor_coef  Fsqd  
_refine_ls_matrix_type            full 
_refine_ls_weighting_scheme       calc  
_refine_ls_weighting_details 
 'calc w=1/[\s^2^(Fo^2^)+(0.0440P)^2^+0.0000P] where P=(Fo^2^+2Fc^2^)/3' 
_atom_sites_solution_primary      direct 
_atom_sites_solution_secondary    difmap 
_atom_sites_solution_hydrogens    geom 
_refine_ls_hydrogen_treatment     constr 
_refine_ls_extinction_method      none 
_refine_ls_extinction_coef        ? 
_refine_ls_number_reflns          5247 
_refine_ls_number_parameters      336 
_refine_ls_number_restraints      0 
_refine_ls_R_factor_all           0.0974 
_refine_ls_R_factor_gt            0.0480 
_refine_ls_wR_factor_ref          0.1032 
_refine_ls_wR_factor_gt           0.0919 
_refine_ls_goodness_of_fit_ref    1.010 
_refine_ls_restrained_S_all       1.010 
_refine_ls_shift/su_max           0.000 
_refine_ls_shift/su_mean          0.000 
 
loop_ 
 _atom_site_label 
 _atom_site_type_symbol 
 _atom_site_fract_x 
 _atom_site_fract_y 
 _atom_site_fract_z 
 _atom_site_U_iso_or_equiv 
 _atom_site_adp_type 
 _atom_site_occupancy 
 _atom_site_symmetry_multiplicity 
 _atom_site_calc_flag 
 _atom_site_refinement_flags 
 _atom_site_disorder_assembly 
 _atom_site_disorder_group 
P1 P 0.89635(6) 0.35522(5) 0.79100(5) 0.01740(17) Uani 1 1 d . . . 
C1 C 0.5511(2) 0.36197(18) 0.4286(2) 0.0266(7) Uani 1 1 d . . . 
H1A H 0.4879 0.3986 0.3643 0.040 Uiso 1 1 calc R . . 
H1B H 0.6211 0.3672 0.4454 0.040 Uiso 1 1 calc R . . 
H1C H 0.5672 0.3872 0.4879 0.040 Uiso 1 1 calc R . . 
N N 0.69620(16) 0.22085(14) 0.59645(15) 0.0145(5) Uani 1 1 d . . . 
P2 P 0.53931(5) 0.27656(5) 0.61850(5) 0.01641(17) Uani 1 1 d . . . 
C11 C 0.58694(19) 0.19221(17) 0.49212(19) 0.0143(6) Uani 1 1 d . . . 
C12 C 0.5162(2) 0.25985(18) 0.4110(2) 0.0173(6) Uani 1 1 d . . . 
C13 C 0.4104(2) 0.22957(19) 0.3126(2) 0.0219(6) Uani 1 1 d . . . 
H13 H 0.3615 0.2745 0.2564 0.026 Uiso 1 1 calc R . . 
C15 C 0.4449(2) 0.06967(18) 0.3732(2) 0.0214(6) Uani 1 1 d . . . 
H15 H 0.4213 0.0049 0.3604 0.026 Uiso 1 1 calc R . . 
C14 C 0.3741(2) 0.13600(19) 0.2938(2) 0.0219(6) Uani 1 1 d . . . 
H14 H 0.3002 0.1176 0.2262 0.026 Uiso 1 1 calc R . . 
C16 C 0.5515(2) 0.09804(18) 0.4724(2) 0.0183(6) Uani 1 1 d . . . 
H16 H 0.6008 0.0522 0.5275 0.022 Uiso 1 1 calc R . . 
C21 C 0.7892(2) 0.24171(16) 0.60889(19) 0.0144(6) Uani 1 1 d . . . 
C22 C 0.8852(2) 0.29758(16) 0.69370(19) 0.0152(6) Uani 1 1 d . . . 
C23 C 0.9738(2) 0.30896(17) 0.7017(2) 0.0172(6) Uani 1 1 d . . . 
H23 H 1.0405 0.3445 0.7602 0.021 Uiso 1 1 calc R . . 
C24 C 0.9713(2) 0.27211(18) 0.6306(2) 0.0171(6) Uani 1 1 d . . . 
C25 C 0.8731(2) 0.22135(18) 0.5457(2) 0.0193(6) Uani 1 1 d . . . 
H25 H 0.8664 0.1970 0.4934 0.023 Uiso 1 1 calc R . . 
C26 C 0.7842(2) 0.20548(18) 0.5356(2) 0.0190(6) Uani 1 1 d . . . 
H26 H 0.7185 0.1690 0.4774 0.023 Uiso 1 1 calc R . . 
C27 C 1.0706(2) 0.28760(19) 0.6452(2) 0.0245(7) Uani 1 1 d . . . 
H27A H 1.0402 0.3081 0.5778 0.037 Uiso 1 1 calc R . . 
H27B H 1.1139 0.2279 0.6682 0.037 Uiso 1 1 calc R . . 
H27C H 1.1225 0.3368 0.6992 0.037 Uiso 1 1 calc R . . 
C31 C 0.7267(2) 0.17492(16) 0.68339(19) 0.0151(6) Uani 1 1 d . . . 
C32 C 0.66484(19) 0.19545(16) 0.70632(19) 0.0133(6) Uani 1 1 d . . . 
C33 C 0.70055(19) 0.15066(16) 0.79339(19) 0.0155(6) Uani 1 1 d . . . 
H33 H 0.6617 0.1660 0.8114 0.019 Uiso 1 1 calc R . . 
C34 C 0.7906(2) 0.08428(17) 0.8557(2) 0.0174(6) Uani 1 1 d . . . 
C35 C 0.8471(2) 0.06419(17) 0.8289(2) 0.0204(6) Uani 1 1 d . . . 
H35 H 0.9083 0.0187 0.8694 0.024 Uiso 1 1 calc R . . 
C36 C 0.8162(2) 0.10882(17) 0.7449(2) 0.0172(6) Uani 1 1 d . . . 
H36 H 0.8569 0.0941 0.7287 0.021 Uiso 1 1 calc R . . 
C37 C 0.8227(2) 0.03509(18) 0.9469(2) 0.0228(6) Uani 1 1 d . . . 
H37A H 0.8720 0.0773 1.0089 0.034 Uiso 1 1 calc R . . 
H37B H 0.8651 -0.0238 0.9644 0.034 Uiso 1 1 calc R . . 
H37C H 0.7519 0.0198 0.9268 0.034 Uiso 1 1 calc R . . 
C41 C 1.0545(2) 0.34269(17) 0.9156(2) 0.0200(6) Uani 1 1 d . . . 
H41 H 1.0995 0.3678 0.9034 0.024 Uiso 1 1 calc R . . 
C42 C 1.0845(2) 0.23781(18) 0.9466(2) 0.0243(6) Uani 1 1 d . . . 
H42A H 1.1659 0.2321 1.0160 0.036 Uiso 1 1 calc R . . 
H42B H 1.0731 0.2032 0.8934 0.036 Uiso 1 1 calc R . . 
H42C H 1.0339 0.2107 0.9502 0.036 Uiso 1 1 calc R . . 
C43 C 1.0853(2) 0.4012(2) 1.0035(2) 0.0275(7) Uani 1 1 d . . . 
H43A H 1.0768 0.4692 0.9871 0.041 Uiso 1 1 calc R . . 
H43B H 1.1658 0.3879 1.0714 0.041 Uiso 1 1 calc R . . 
H43C H 1.0329 0.3838 1.0083 0.041 Uiso 1 1 calc R . . 
C44 C 0.8856(2) 0.48472(17) 0.7617(2) 0.0237(7) Uani 1 1 d . . . 
H44 H 0.9009 0.5194 0.8182 0.028 Uiso 1 1 calc R . . 
C45 C 0.9699(2) 0.52684(19) 0.7622(2) 0.0326(7) Uani 1 1 d . . . 
H45A H 0.9536 0.4997 0.7035 0.049 Uiso 1 1 calc R . . 
H45B H 1.0500 0.5116 0.8297 0.049 Uiso 1 1 calc R . . 
H45C H 0.9601 0.5962 0.7539 0.049 Uiso 1 1 calc R . . 
C46 C 0.7611(2) 0.5087(2) 0.6576(2) 0.0378(8) Uani 1 1 d . . . 
H46A H 0.7449 0.4843 0.5982 0.057 Uiso 1 1 calc R . . 
H46B H 0.7505 0.5781 0.6512 0.057 Uiso 1 1 calc R . . 
H46C H 0.7075 0.4793 0.6566 0.057 Uiso 1 1 calc R . . 
C51 C 0.4214(2) 0.18508(18) 0.5493(2) 0.0198(6) Uani 1 1 d . . . 
H51 H 0.4448 0.1315 0.5323 0.024 Uiso 1 1 calc R . . 
C52 C 0.3069(2) 0.2223(2) 0.4419(2) 0.0308(7) Uani 1 1 d . . . 
H52A H 0.3203 0.2479 0.4021 0.046 Uiso 1 1 calc R . . 
H52B H 0.2765 0.2729 0.4530 0.046 Uiso 1 1 calc R . . 
H52C H 0.2505 0.1701 0.4017 0.046 Uiso 1 1 calc R . . 
C53 C 0.4034(2) 0.13954(19) 0.6114(2) 0.0253(7) Uani 1 1 d . . . 
H53A H 0.4769 0.1121 0.6773 0.038 Uiso 1 1 calc R . . 
H53B H 0.3447 0.0891 0.5685 0.038 Uiso 1 1 calc R . . 
H53C H 0.3770 0.1881 0.6282 0.038 Uiso 1 1 calc R . . 
C54 C 0.5450(2) 0.33727(17) 0.7116(2) 0.0196(6) Uani 1 1 d . . . 
H54 H 0.5528 0.2890 0.7563 0.023 Uiso 1 1 calc R . . 
C55 C 0.6498(2) 0.40411(19) 0.7819(2) 0.0267(7) Uani 1 1 d . . . 
H55A H 0.6395 0.4533 0.7379 0.040 Uiso 1 1 calc R . . 
H55B H 0.7205 0.3676 0.8188 0.040 Uiso 1 1 calc R . . 
H55C H 0.6567 0.4343 0.8342 0.040 Uiso 1 1 calc R . . 
C56 C 0.4334(2) 0.39524(18) 0.6477(2) 0.0255(7) Uani 1 1 d . . . 
H56A H 0.4209 0.4363 0.5971 0.038 Uiso 1 1 calc R . . 
H56B H 0.4407 0.4347 0.6961 0.038 Uiso 1 1 calc R . . 
H56C H 0.3673 0.3518 0.6090 0.038 Uiso 1 1 calc R . . 
 
loop_ 
 _atom_site_aniso_label 
 _atom_site_aniso_U_11 
 _atom_site_aniso_U_22 
 _atom_site_aniso_U_33 
 _atom_site_aniso_U_23 
 _atom_site_aniso_U_13 
 _atom_site_aniso_U_12 
P1 0.0182(4) 0.0180(4) 0.0197(4) -0.0031(3) 0.0150(3) -0.0028(3) 
C1 0.0238(15) 0.0227(15) 0.0272(16) 0.0052(13) 0.0167(14) -0.0002(12) 
N 0.0110(11) 0.0183(11) 0.0137(11) -0.0018(10) 0.0089(10) -0.0031(9) 
P2 0.0159(4) 0.0161(4) 0.0178(4) 0.0035(3) 0.0125(3) 0.0038(3) 
C11 0.0106(13) 0.0172(14) 0.0182(15) -0.0028(12) 0.0115(13) -0.0025(11) 
C12 0.0145(14) 0.0211(15) 0.0171(14) -0.0009(12) 0.0118(13) -0.0007(11) 
C13 0.0203(15) 0.0276(16) 0.0188(15) 0.0040(13) 0.0146(14) 0.0030(12) 
C15 0.0225(15) 0.0201(15) 0.0252(16) -0.0072(13) 0.0186(14) -0.0057(12) 
C14 0.0149(14) 0.0336(17) 0.0168(15) -0.0059(13) 0.0114(13) -0.0027(13) 
C16 0.0177(14) 0.0199(14) 0.0190(15) -0.0011(12) 0.0140(13) -0.0004(12) 
C21 0.0147(13) 0.0129(13) 0.0183(15) 0.0042(11) 0.0129(13) 0.0023(10) 
C22 0.0165(14) 0.0139(14) 0.0183(14) 0.0029(11) 0.0137(13) 0.0020(11) 
C23 0.0132(13) 0.0188(14) 0.0130(14) 0.0012(11) 0.0075(12) -0.0025(11) 
C24 0.0159(14) 0.0196(14) 0.0168(14) 0.0024(12) 0.0123(13) 0.0013(11) 
C25 0.0230(15) 0.0229(15) 0.0185(15) -0.0015(12) 0.0172(13) 0.0005(12) 
C26 0.0153(14) 0.0241(15) 0.0149(14) -0.0006(12) 0.0102(12) -0.0032(11) 
C27 0.0210(15) 0.0344(17) 0.0240(16) -0.0031(13) 0.0184(14) -0.0033(13) 
C31 0.0152(14) 0.0096(13) 0.0159(14) -0.0022(11) 0.0099(13) -0.0044(11) 
C32 0.0116(13) 0.0114(13) 0.0161(14) -0.0004(11) 0.0099(12) -0.0017(10) 
C33 0.0118(13) 0.0167(14) 0.0169(14) -0.0023(12) 0.0101(12) -0.0021(11) 
C34 0.0113(13) 0.0162(14) 0.0143(14) -0.0026(12) 0.0060(12) -0.0046(11) 
C35 0.0113(13) 0.0156(14) 0.0208(15) 0.0043(12) 0.0074(13) 0.0030(11) 
C36 0.0137(13) 0.0147(13) 0.0235(15) 0.0008(12) 0.0137(13) 0.0018(11) 
C37 0.0204(15) 0.0215(15) 0.0190(15) 0.0023(13) 0.0120(13) -0.0012(12) 
C41 0.0200(14) 0.0226(15) 0.0201(15) -0.0039(12) 0.0155(13) -0.0055(12) 
C42 0.0210(15) 0.0297(16) 0.0203(15) 0.0016(13) 0.0145(14) 0.0029(12) 
C43 0.0267(16) 0.0305(16) 0.0198(16) -0.0075(14) 0.0153(14) -0.0064(13) 
C44 0.0290(16) 0.0160(14) 0.0265(16) -0.0022(12) 0.0205(15) -0.0002(12) 
C45 0.0414(18) 0.0200(16) 0.0390(19) -0.0055(14) 0.0301(17) -0.0099(14) 
C46 0.0386(19) 0.0269(17) 0.0368(19) 0.0045(15) 0.0241(17) 0.0037(14) 
C51 0.0153(14) 0.0239(14) 0.0199(15) -0.0008(12) 0.0128(13) 0.0025(11) 
C52 0.0159(15) 0.0461(19) 0.0261(17) 0.0053(15) 0.0140(14) 0.0014(14) 
C53 0.0191(15) 0.0255(15) 0.0271(16) 0.0017(13) 0.0155(14) -0.0012(12) 
C54 0.0236(15) 0.0182(15) 0.0241(15) 0.0059(12) 0.0197(14) 0.0059(11) 
C55 0.0289(16) 0.0255(16) 0.0230(16) -0.0020(13) 0.0182(14) 0.0006(13) 
C56 0.0305(16) 0.0220(15) 0.0332(17) 0.0036(14) 0.0262(15) 0.0070(13) 
 
_geom_special_details 
; 
 All esds (except the esd in the dihedral angle between two l.s. planes) 
 are estimated using the full covariance matrix.  The cell esds are taken 
 into account individually in the estimation of esds in distances, angles 
 and torsion angles; correlations between esds in cell parameters are only 
 used when they are defined by crystal symmetry.  An approximate (isotropic) 
 treatment of cell esds is used for estimating esds involving l.s. planes. 
; 
 
loop_ 
 _geom_bond_atom_site_label_1 
 _geom_bond_atom_site_label_2 
 _geom_bond_distance 
 _geom_bond_site_symmetry_2 
 _geom_bond_publ_flag 
P1 C22 1.850(3) . ? 
P1 C41 1.861(3) . ? 
P1 C44 1.866(3) . ? 
C1 C12 1.491(3) . ? 
C1 H1A 0.9800 . ? 
C1 H1B 0.9800 . ? 
C1 H1C 0.9800 . ? 
N C31 1.432(3) . ? 
N C21 1.438(3) . ? 
N C11 1.441(3) . ? 
P2 C32 1.840(2) . ? 
P2 C54 1.856(3) . ? 
P2 C51 1.875(3) . ? 
C11 C16 1.384(3) . ? 
C11 C12 1.398(3) . ? 
C12 C13 1.388(3) . ? 
C13 C14 1.381(4) . ? 
C13 H13 0.9500 . ? 
C15 C14 1.371(3) . ? 
C15 C16 1.390(3) . ? 
C15 H15 0.9500 . ? 
C14 H14 0.9500 . ? 
C16 H16 0.9500 . ? 
C21 C26 1.390(3) . ? 
C21 C22 1.407(3) . ? 
C22 C23 1.398(3) . ? 
C23 C24 1.382(3) . ? 
C23 H23 0.9500 . ? 
C24 C25 1.382(3) . ? 
C24 C27 1.505(3) . ? 
C25 C26 1.385(3) . ? 
C25 H25 0.9500 . ? 
C26 H26 0.9500 . ? 
C27 H27A 0.9800 . ? 
C27 H27B 0.9800 . ? 
C27 H27C 0.9800 . ? 
C31 C36 1.386(3) . ? 
C31 C32 1.411(3) . ? 
C32 C33 1.388(3) . ? 
C33 C34 1.393(3) . ? 
C33 H33 0.9500 . ? 
C34 C35 1.386(3) . ? 
C34 C37 1.507(3) . ? 
C35 C36 1.375(3) . ? 
C35 H35 0.9500 . ? 
C36 H36 0.9500 . ? 
C37 H37A 0.9800 . ? 
C37 H37B 0.9800 . ? 
C37 H37C 0.9800 . ? 
C41 C42 1.524(3) . ? 
C41 C43 1.532(3) . ? 
C41 H41 1.0000 . ? 
C42 H42A 0.9800 . ? 
C42 H42B 0.9800 . ? 
C42 H42C 0.9800 . ? 
C43 H43A 0.9800 . ? 
C43 H43B 0.9800 . ? 
C43 H43C 0.9800 . ? 
C44 C46 1.522(4) . ? 
C44 C45 1.531(4) . ? 
C44 H44 1.0000 . ? 
C45 H45A 0.9800 . ? 
C45 H45B 0.9800 . ? 
C45 H45C 0.9800 . ? 
C46 H46A 0.9800 . ? 
C46 H46B 0.9800 . ? 
C46 H46C 0.9800 . ? 
C51 C53 1.523(3) . ? 
C51 C52 1.528(3) . ? 
C51 H51 1.0000 . ? 
C52 H52A 0.9800 . ? 
C52 H52B 0.9800 . ? 
C52 H52C 0.9800 . ? 
C53 H53A 0.9800 . ? 
C53 H53B 0.9800 . ? 
C53 H53C 0.9800 . ? 
C54 C55 1.527(3) . ? 
C54 C56 1.532(3) . ? 
C54 H54 1.0000 . ? 
C55 H55A 0.9800 . ? 
C55 H55B 0.9800 . ? 
C55 H55C 0.9800 . ? 
C56 H56A 0.9800 . ? 
C56 H56B 0.9800 . ? 
C56 H56C 0.9800 . ? 
 
loop_ 
 _geom_angle_atom_site_label_1 
 _geom_angle_atom_site_label_2 
 _geom_angle_atom_site_label_3 
 _geom_angle 
 _geom_angle_site_symmetry_1 
 _geom_angle_site_symmetry_3 
 _geom_angle_publ_flag 
C22 P1 C41 101.30(11) . . ? 
C22 P1 C44 102.95(12) . . ? 
C41 P1 C44 101.42(12) . . ? 
C12 C1 H1A 109.5 . . ? 
C12 C1 H1B 109.5 . . ? 
H1A C1 H1B 109.5 . . ? 
C12 C1 H1C 109.5 . . ? 
H1A C1 H1C 109.5 . . ? 
H1B C1 H1C 109.5 . . ? 
C31 N C21 117.16(19) . . ? 
C31 N C11 115.71(18) . . ? 
C21 N C11 116.7(2) . . ? 
C32 P2 C54 102.70(11) . . ? 
C32 P2 C51 98.08(11) . . ? 
C54 P2 C51 104.86(11) . . ? 
C16 C11 C12 120.0(2) . . ? 
C16 C11 N 120.1(2) . . ? 
C12 C11 N 119.9(2) . . ? 
C13 C12 C11 117.9(2) . . ? 
C13 C12 C1 120.3(2) . . ? 
C11 C12 C1 121.8(2) . . ? 
C14 C13 C12 121.9(2) . . ? 
C14 C13 H13 119.0 . . ? 
C12 C13 H13 119.0 . . ? 
C14 C15 C16 119.4(2) . . ? 
C14 C15 H15 120.3 . . ? 
C16 C15 H15 120.3 . . ? 
C15 C14 C13 119.8(2) . . ? 
C15 C14 H14 120.1 . . ? 
C13 C14 H14 120.1 . . ? 
C11 C16 C15 120.9(2) . . ? 
C11 C16 H16 119.6 . . ? 
C15 C16 H16 119.6 . . ? 
C26 C21 C22 119.3(2) . . ? 
C26 C21 N 119.2(2) . . ? 
C22 C21 N 121.6(2) . . ? 
C23 C22 C21 116.9(2) . . ? 
C23 C22 P1 120.32(18) . . ? 
C21 C22 P1 122.79(18) . . ? 
C24 C23 C22 124.6(2) . . ? 
C24 C23 H23 117.7 . . ? 
C22 C23 H23 117.7 . . ? 
C25 C24 C23 116.8(2) . . ? 
C25 C24 C27 122.0(2) . . ? 
C23 C24 C27 121.2(2) . . ? 
C24 C25 C26 121.0(2) . . ? 
C24 C25 H25 119.5 . . ? 
C26 C25 H25 119.5 . . ? 
C25 C26 C21 121.4(2) . . ? 
C25 C26 H26 119.3 . . ? 
C21 C26 H26 119.3 . . ? 
C24 C27 H27A 109.5 . . ? 
C24 C27 H27B 109.5 . . ? 
H27A C27 H27B 109.5 . . ? 
C24 C27 H27C 109.5 . . ? 
H27A C27 H27C 109.5 . . ? 
H27B C27 H27C 109.5 . . ? 
C36 C31 C32 119.5(2) . . ? 
C36 C31 N 120.1(2) . . ? 
C32 C31 N 120.4(2) . . ? 
C33 C32 C31 117.7(2) . . ? 
C33 C32 P2 123.12(18) . . ? 
C31 C32 P2 119.17(18) . . ? 
C32 C33 C34 123.2(2) . . ? 
C32 C33 H33 118.4 . . ? 
C34 C33 H33 118.4 . . ? 
C35 C34 C33 117.3(2) . . ? 
C35 C34 C37 121.8(2) . . ? 
C33 C34 C37 120.9(2) . . ? 
C36 C35 C34 121.2(2) . . ? 
C36 C35 H35 119.4 . . ? 
C34 C35 H35 119.4 . . ? 
C35 C36 C31 121.0(2) . . ? 
C35 C36 H36 119.5 . . ? 
C31 C36 H36 119.5 . . ? 
C34 C37 H37A 109.5 . . ? 
C34 C37 H37B 109.5 . . ? 
H37A C37 H37B 109.5 . . ? 
C34 C37 H37C 109.5 . . ? 
H37A C37 H37C 109.5 . . ? 
H37B C37 H37C 109.5 . . ? 
C42 C41 C43 110.9(2) . . ? 
C42 C41 P1 109.73(17) . . ? 
C43 C41 P1 109.20(17) . . ? 
C42 C41 H41 109.0 . . ? 
C43 C41 H41 109.0 . . ? 
P1 C41 H41 109.0 . . ? 
C41 C42 H42A 109.5 . . ? 
C41 C42 H42B 109.5 . . ? 
H42A C42 H42B 109.5 . . ? 
C41 C42 H42C 109.5 . . ? 
H42A C42 H42C 109.5 . . ? 
H42B C42 H42C 109.5 . . ? 
C41 C43 H43A 109.5 . . ? 
C41 C43 H43B 109.5 . . ? 
H43A C43 H43B 109.5 . . ? 
C41 C43 H43C 109.5 . . ? 
H43A C43 H43C 109.5 . . ? 
H43B C43 H43C 109.5 . . ? 
C46 C44 C45 109.9(2) . . ? 
C46 C44 P1 109.47(18) . . ? 
C45 C44 P1 118.75(18) . . ? 
C46 C44 H44 106.0 . . ? 
C45 C44 H44 106.0 . . ? 
P1 C44 H44 106.0 . . ? 
C44 C45 H45A 109.5 . . ? 
C44 C45 H45B 109.5 . . ? 
H45A C45 H45B 109.5 . . ? 
C44 C45 H45C 109.5 . . ? 
H45A C45 H45C 109.5 . . ? 
H45B C45 H45C 109.5 . . ? 
C44 C46 H46A 109.5 . . ? 
C44 C46 H46B 109.5 . . ? 
H46A C46 H46B 109.5 . . ? 
C44 C46 H46C 109.5 . . ? 
H46A C46 H46C 109.5 . . ? 
H46B C46 H46C 109.5 . . ? 
C53 C51 C52 111.2(2) . . ? 
C53 C51 P2 117.98(18) . . ? 
C52 C51 P2 110.76(18) . . ? 
C53 C51 H51 105.2 . . ? 
C52 C51 H51 105.2 . . ? 
P2 C51 H51 105.2 . . ? 
C51 C52 H52A 109.5 . . ? 
C51 C52 H52B 109.5 . . ? 
H52A C52 H52B 109.5 . . ? 
C51 C52 H52C 109.5 . . ? 
H52A C52 H52C 109.5 . . ? 
H52B C52 H52C 109.5 . . ? 
C51 C53 H53A 109.5 . . ? 
C51 C53 H53B 109.5 . . ? 
H53A C53 H53B 109.5 . . ? 
C51 C53 H53C 109.5 . . ? 
H53A C53 H53C 109.5 . . ? 
H53B C53 H53C 109.5 . . ? 
C55 C54 C56 109.6(2) . . ? 
C55 C54 P2 108.29(17) . . ? 
C56 C54 P2 109.10(18) . . ? 
C55 C54 H54 110.0 . . ? 
C56 C54 H54 110.0 . . ? 
P2 C54 H54 110.0 . . ? 
C54 C55 H55A 109.5 . . ? 
C54 C55 H55B 109.5 . . ? 
H55A C55 H55B 109.5 . . ? 
C54 C55 H55C 109.5 . . ? 
H55A C55 H55C 109.5 . . ? 
H55B C55 H55C 109.5 . . ? 
C54 C56 H56A 109.5 . . ? 
C54 C56 H56B 109.5 . . ? 
H56A C56 H56B 109.5 . . ? 
C54 C56 H56C 109.5 . . ? 
H56A C56 H56C 109.5 . . ? 
H56B C56 H56C 109.5 . . ? 
 
_diffrn_measured_fraction_theta_max    1.000 
_diffrn_reflns_theta_full              25.00 
_diffrn_measured_fraction_theta_full   1.000 
_refine_diff_density_max    0.267 
_refine_diff_density_min   -0.288 
_refine_diff_density_rms    0.060
_iucr_refine_instructions_details
;
TITL Sean in P2(1)/c
CELL 0.71073 16.853 14.0257 18.461481 90 136.967407 90
ZERR 4 0.0014 0.0012 0.00178 0 0.005 0
LATT 1
SYMM -X,0.5+Y,0.5-Z
 
SFAC C H N P
UNIT 132 188 4 8
OMIT 0 50
 
L.S. 4
PLAN  20
SIZE 0.039 0.133 0.162
TEMP -153.16
LIST 6
Acta 50
BOND $H
FMAP 2
 
WGHT    0.044000
FVAR       0.34922
P1    4    0.896347    0.355217    0.790995    11.00000    0.01818    0.01801 =
         0.01965   -0.00310    0.01498   -0.00276
C1    1    0.551102    0.361971    0.428644    11.00000    0.02382    0.02271 =
         0.02723    0.00519    0.01674   -0.00017
AFIX 137
H1A   2    0.487897    0.398603    0.364265    11.00000   -1.50000
H1B   2    0.621105    0.367249    0.445355    11.00000   -1.50000
H1C   2    0.567236    0.387175    0.487889    11.00000   -1.50000
AFIX   0
N     3    0.696197    0.220849    0.596450    11.00000    0.01103    0.01828 =
         0.01369   -0.00184    0.00889   -0.00312
P2    4    0.539309    0.276563    0.618499    11.00000    0.01594    0.01607 =
         0.01784    0.00353    0.01255    0.00381
C11   1    0.586942    0.192205    0.492117    11.00000    0.01057    0.01716 =
         0.01822   -0.00283    0.01147   -0.00250
C12   1    0.516207    0.259855    0.411031    11.00000    0.01451    0.02114 =
         0.01708   -0.00091    0.01180   -0.00070
C13   1    0.410381    0.229568    0.312584    11.00000    0.02035    0.02762 =
         0.01878    0.00402    0.01460    0.00297
AFIX  43
H13   2    0.361483    0.274526    0.256429    11.00000   -1.20000
AFIX   0
C15   1    0.444886    0.069666    0.373165    11.00000    0.02249    0.02008 =
         0.02525   -0.00719    0.01863   -0.00568
AFIX  43
H15   2    0.421290    0.004873    0.360394    11.00000   -1.20000
AFIX   0
C14   1    0.374053    0.135995    0.293839    11.00000    0.01489    0.03362 =
         0.01677   -0.00595    0.01141   -0.00271
AFIX  43
H14   2    0.300212    0.117650    0.226188    11.00000   -1.20000
AFIX   0
C16   1    0.551523    0.098040    0.472438    11.00000    0.01768    0.01988 =
         0.01901   -0.00109    0.01396   -0.00039
AFIX  43
H16   2    0.600751    0.052189    0.527516    11.00000   -1.20000
AFIX   0
C21   1    0.789192    0.241707    0.608890    11.00000    0.01467    0.01295 =
         0.01826    0.00415    0.01291    0.00234
C22   1    0.885225    0.297576    0.693702    11.00000    0.01653    0.01388 =
         0.01826    0.00286    0.01370    0.00198
C23   1    0.973832    0.308959    0.701738    11.00000    0.01320    0.01882 =
         0.01296    0.00120    0.00746   -0.00245
AFIX  43
H23   2    1.040484    0.344496    0.760179    11.00000   -1.20000
AFIX   0
C24   1    0.971252    0.272115    0.630581    11.00000    0.01589    0.01960 =
         0.01680    0.00242    0.01226    0.00131
C25   1    0.873067    0.221354    0.545650    11.00000    0.02298    0.02291 =
         0.01847   -0.00148    0.01717    0.00053
AFIX  43
H25   2    0.866398    0.196981    0.493369    11.00000   -1.20000
AFIX   0
C26   1    0.784234    0.205475    0.535597    11.00000    0.01534    0.02413 =
         0.01492   -0.00062    0.01021   -0.00317
AFIX  43
H26   2    0.718540    0.169047    0.477366    11.00000   -1.20000
AFIX   0
C27   1    1.070627    0.287596    0.645214    11.00000    0.02101    0.03444 =
         0.02402   -0.00305    0.01840   -0.00327
AFIX 137
H27A  2    1.040194    0.308130    0.577843    11.00000   -1.50000
H27B  2    1.113900    0.227913    0.668159    11.00000   -1.50000
H27C  2    1.122518    0.336831    0.699174    11.00000   -1.50000
AFIX   0
C31   1    0.726662    0.174924    0.683393    11.00000    0.01524    0.00962 =
         0.01587   -0.00224    0.00988   -0.00439
C32   1    0.664843    0.195453    0.706319    11.00000    0.01163    0.01137 =
         0.01614   -0.00043    0.00991   -0.00166
C33   1    0.700554    0.150657    0.793395    11.00000    0.01180    0.01673 =
         0.01693   -0.00232    0.01014   -0.00215
AFIX  43
H33   2    0.661722    0.166017    0.811376    11.00000   -1.20000
AFIX   0
C34   1    0.790563    0.084277    0.855685    11.00000    0.01133    0.01623 =
         0.01430   -0.00261    0.00603   -0.00465
C35   1    0.847103    0.064185    0.828891    11.00000    0.01132    0.01558 =
         0.02078    0.00427    0.00742    0.00304
AFIX  43
H35   2    0.908326    0.018718    0.869358    11.00000   -1.20000
AFIX   0
C36   1    0.816248    0.108816    0.744863    11.00000    0.01370    0.01467 =
         0.02352    0.00080    0.01366    0.00182
AFIX  43
H36   2    0.856948    0.094134    0.728654    11.00000   -1.20000
AFIX   0
C37   1    0.822730    0.035087    0.946928    11.00000    0.02042    0.02151 =
         0.01903    0.00229    0.01200   -0.00122
AFIX 137
H37A  2    0.872045    0.077315    1.008900    11.00000   -1.50000
H37B  2    0.865136   -0.023813    0.964378    11.00000   -1.50000
H37C  2    0.751921    0.019779    0.926822    11.00000   -1.50000
AFIX   0
C41   1    1.054489    0.342691    0.915585    11.00000    0.01997    0.02263 =
         0.02005   -0.00391    0.01545   -0.00553
AFIX  13
H41   2    1.099517    0.367774    0.903393    11.00000   -1.20000
AFIX   0
C42   1    1.084515    0.237812    0.946557    11.00000    0.02096    0.02973 =
         0.02034    0.00156    0.01451    0.00292
AFIX 137
H42A  2    1.165860    0.232080    1.016036    11.00000   -1.50000
H42B  2    1.073081    0.203240    0.893350    11.00000   -1.50000
H42C  2    1.033907    0.210692    0.950196    11.00000   -1.50000
AFIX   0
C43   1    1.085257    0.401161    1.003508    11.00000    0.02675    0.03055 =
         0.01978   -0.00749    0.01532   -0.00636
AFIX 137
H43A  2    1.076787    0.469218    0.987058    11.00000   -1.50000
H43B  2    1.165765    0.387881    1.071397    11.00000   -1.50000
H43C  2    1.032906    0.383797    1.008327    11.00000   -1.50000
AFIX   0
C44   1    0.885628    0.484716    0.761678    11.00000    0.02903    0.01603 =
         0.02650   -0.00221    0.02047   -0.00019
AFIX  13
H44   2    0.900930    0.519444    0.818226    11.00000   -1.20000
AFIX   0
C45   1    0.969898    0.526844    0.762227    11.00000    0.04140    0.01997 =
         0.03895   -0.00551    0.03015   -0.00994
AFIX 137
H45A  2    0.953556    0.499658    0.703494    11.00000   -1.50000
H45B  2    1.049962    0.511623    0.829669    11.00000   -1.50000
H45C  2    0.960103    0.596211    0.753871    11.00000   -1.50000
AFIX   0
C46   1    0.761052    0.508722    0.657647    11.00000    0.03857    0.02695 =
         0.03684    0.00452    0.02408    0.00374
AFIX 137
H46A  2    0.744945    0.484280    0.598191    11.00000   -1.50000
H46B  2    0.750519    0.578054    0.651173    11.00000   -1.50000
H46C  2    0.707455    0.479293    0.656569    11.00000   -1.50000
AFIX   0
C51   1    0.421407    0.185075    0.549316    11.00000    0.01530    0.02393 =
         0.01991   -0.00078    0.01281    0.00252
AFIX  13
H51   2    0.444815    0.131529    0.532279    11.00000   -1.20000
AFIX   0
C52   1    0.306883    0.222306    0.441900    11.00000    0.01592    0.04606 =
         0.02613    0.00527    0.01398    0.00144
AFIX 137
H52A  2    0.320257    0.247887    0.402134    11.00000   -1.50000
H52B  2    0.276486    0.272853    0.452996    11.00000   -1.50000
H52C  2    0.250457    0.170057    0.401681    11.00000   -1.50000
AFIX   0
C53   1    0.403397    0.139536    0.611373    11.00000    0.01910    0.02546 =
         0.02707    0.00167    0.01549   -0.00124
AFIX 137
H53A  2    0.476916    0.112113    0.677349    11.00000   -1.50000
H53B  2    0.344707    0.089117    0.568494    11.00000   -1.50000
H53C  2    0.376984    0.188086    0.628196    11.00000   -1.50000
AFIX   0
C54   1    0.545010    0.337270    0.711560    11.00000    0.02364    0.01823 =
         0.02406    0.00590    0.01974    0.00588
AFIX  13
H54   2    0.552805    0.289007    0.756333    11.00000   -1.20000
AFIX   0
C55   1    0.649816    0.404106    0.781899    11.00000    0.02895    0.02546 =
         0.02304   -0.00204    0.01818    0.00058
AFIX 137
H55A  2    0.639472    0.453340    0.737886    11.00000   -1.50000
H55B  2    0.720546    0.367579    0.818786    11.00000   -1.50000
H55C  2    0.656693    0.434293    0.834170    11.00000   -1.50000
AFIX   0
C56   1    0.433434    0.395238    0.647692    11.00000    0.03049    0.02196 =
         0.03318    0.00365    0.02616    0.00704
AFIX 137
H56A  2    0.420915    0.436278    0.597090    11.00000   -1.50000
H56B  2    0.440705    0.434746    0.696092    11.00000   -1.50000
H56C  2    0.367289    0.351780    0.609028    11.00000   -1.50000
HKLF 4
 
REM  Sean in P2(1)/c
REM R1 =  0.0480 for   3392 Fo > 4sig(Fo)  and  0.0974 for all   5247 data
REM    336 parameters refined using      0 restraints
 
END  
     
WGHT      0.0440      0.0000 
REM Highest difference peak  0.267,  deepest hole -0.288,  1-sigma level  0.060
Q1    1   0.8057  0.0761  0.9816  11.00000  0.05    0.27
Q2    1   0.5355  0.3234  0.6650  11.00000  0.05    0.26
Q3    1   0.8978  0.3022  0.7456  11.00000  0.05    0.26
Q4    1   0.7447  0.2351  0.6058  11.00000  0.05    0.26
Q5    1   0.7916 -0.0202  0.9234  11.00000  0.05    0.25
Q6    1   0.4781  0.2180  0.5941  11.00000  0.05    0.25
Q7    1   0.8576  0.2516  0.6713  11.00000  0.05    0.24
Q8    1   0.5726  0.3170  0.7878  11.00000  0.05    0.24
Q9    1   1.2793  0.2607  1.0817  11.00000  0.05    0.24
Q10   1   0.3698  0.2164  0.5174  11.00000  0.05    0.24
Q11   1   0.8303  0.0958  0.8584  11.00000  0.05    0.23
Q12   1   0.8603  0.1483  0.4715  11.00000  0.05    0.23
Q13   1   0.6613  0.1643  0.6670  11.00000  0.05    0.23
Q14   1   1.0988  0.2317  0.8129  11.00000  0.05    0.22
Q15   1   0.8178  0.1928  0.6025  11.00000  0.05    0.22
Q16   1   0.5265  0.2918  0.5571  11.00000  0.05    0.22
Q17   1   0.4878  0.2059  0.6907  11.00000  0.05    0.22
Q18   1   0.5722  0.2091  0.4384  11.00000  0.05    0.22
Q19   1   0.4715  0.4796  0.3982  11.00000  0.05    0.21
Q20   1   0.8584  0.1231  0.6301  11.00000  0.05    0.21

; 


 
data_sv2 
 
_audit_creation_method            SHELXL-97 
_chemical_name_systematic 
; 
 ? 
; 
_chemical_name_common             ? 
_chemical_melting_point           ? 
_chemical_formula_moiety          ? 
_chemical_formula_sum 
 'C49 H71 Cl Ir N P2' 
_chemical_formula_weight          963.66 
 
loop_ 
 _atom_type_symbol 
 _atom_type_description 
 _atom_type_scat_dispersion_real 
 _atom_type_scat_dispersion_imag 
 _atom_type_scat_source 
 'C'  'C'   0.0033   0.0016 
 'International Tables Vol C Tables 4.2.6.8 and 6.1.1.4' 
 'H'  'H'   0.0000   0.0000 
 'International Tables Vol C Tables 4.2.6.8 and 6.1.1.4' 
 'N'  'N'   0.0061   0.0033 
 'International Tables Vol C Tables 4.2.6.8 and 6.1.1.4' 
 'P'  'P'   0.1023   0.0942 
 'International Tables Vol C Tables 4.2.6.8 and 6.1.1.4' 
 'Cl'  'Cl'   0.1484   0.1585 
 'International Tables Vol C Tables 4.2.6.8 and 6.1.1.4' 
 'Ir'  'Ir'  -1.4442   7.9887 
 'International Tables Vol C Tables 4.2.6.8 and 6.1.1.4' 
 
_symmetry_cell_setting            'triclinic' 
_symmetry_space_group_name_H-M    'P-1' 
 
loop_ 
 _symmetry_equiv_pos_as_xyz 
 'x, y, z' 
 '-x, -y, -z' 
 
_cell_length_a                    11.2348(9) 
_cell_length_b                    13.0430(10) 
_cell_length_c                    15.9073(12) 
_cell_angle_alpha                 91.3980(10) 
_cell_angle_beta                  97.9410(10) 
_cell_angle_gamma                 103.3140(10) 
_cell_volume                      2242.8(3) 
_cell_formula_units_Z             2 
_cell_measurement_temperature     120(2) 
_cell_measurement_reflns_used     9919 
_cell_measurement_theta_min       2.16 
_cell_measurement_theta_max       28.35 
 
_exptl_crystal_description        'block' 
_exptl_crystal_colour             ? 
_exptl_crystal_size_max           0.07 
_exptl_crystal_size_mid           0.06 
_exptl_crystal_size_min           0.03 
_exptl_crystal_density_meas       ? 
_exptl_crystal_density_diffrn     1.427 
_exptl_crystal_density_method     'not measured' 
_exptl_crystal_F_000              992 
_exptl_absorpt_coefficient_mu     3.141 
_exptl_absorpt_correction_type    'multi-scan' 
_exptl_absorpt_correction_T_min   0.5846 
_exptl_absorpt_correction_T_max   0.7457 
_exptl_absorpt_process_details    'Bruker AXS area detector scaling and absorption correction' 
 
_exptl_special_details 
; 
 ? 
; 
 
_diffrn_ambient_temperature       120(2) 
_diffrn_radiation_wavelength      0.71073 
_diffrn_radiation_type            MoK\a 
_diffrn_radiation_source          'fine-focus sealed tube' 
_diffrn_radiation_monochromator   graphite 
_diffrn_measurement_device_type   'Bruker APEX-II' 
_diffrn_measurement_method        ? 
_diffrn_detector_area_resol_mean  ? 
_diffrn_standards_number          ? 
_diffrn_standards_interval_count  ? 
_diffrn_standards_interval_time   ? 
_diffrn_standards_decay_%         ? 
_diffrn_reflns_number             34956 
_diffrn_reflns_av_R_equivalents   0.0315 
_diffrn_reflns_av_sigmaI/netI     0.0353 
_diffrn_reflns_limit_h_min        -14 
_diffrn_reflns_limit_h_max        15 
_diffrn_reflns_limit_k_min        -17 
_diffrn_reflns_limit_k_max        17 
_diffrn_reflns_limit_l_min        -21 
_diffrn_reflns_limit_l_max        20 
_diffrn_reflns_theta_min          1.61 
_diffrn_reflns_theta_max          28.42 
_reflns_number_total              11133 
_reflns_number_gt                 10157 
_reflns_threshold_expression      >2sigma(I) 
 
_computing_data_collection        ? 
_computing_cell_refinement        ? 
_computing_data_reduction         ? 
_computing_structure_solution     'SHELXS-97 (Sheldrick, 1990)' 
_computing_structure_refinement   'SHELXL-97 (Sheldrick, 1997)' 
_computing_molecular_graphics     ? 
_computing_publication_material   ? 
 
_refine_special_details 
; 
 Refinement of F^2^ against ALL reflections.  The weighted R-factor wR and 
 goodness of fit S are based on F^2^, conventional R-factors R are based 
 on F, with F set to zero for negative F^2^. The threshold expression of 
 F^2^ > 2sigma(F^2^) is used only for calculating R-factors(gt) etc. and is 
 not relevant to the choice of reflections for refinement.  R-factors based 
 on F^2^ are statistically about twice as large as those based on F, and R- 
 factors based on ALL data will be even larger. 
; 
 
_refine_ls_structure_factor_coef  Fsqd  
_refine_ls_matrix_type            full 
_refine_ls_weighting_scheme       calc  
_refine_ls_weighting_details 
 'calc w=1/[\s^2^(Fo^2^)+(0.0226P)^2^+3.0337P] where P=(Fo^2^+2Fc^2^)/3' 
_atom_sites_solution_primary      direct 
_atom_sites_solution_secondary    difmap 
_atom_sites_solution_hydrogens    geom 
_refine_ls_hydrogen_treatment     constr 
_refine_ls_extinction_method      none 
_refine_ls_extinction_coef        ? 
_refine_ls_number_reflns          11133 
_refine_ls_number_parameters      517 
_refine_ls_number_restraints      0 
_refine_ls_R_factor_all           0.0342 
_refine_ls_R_factor_gt            0.0287 
_refine_ls_wR_factor_ref          0.0653 
_refine_ls_wR_factor_gt           0.0625 
_refine_ls_goodness_of_fit_ref    1.064 
_refine_ls_restrained_S_all       1.064 
_refine_ls_shift/su_max           0.002 
_refine_ls_shift/su_mean          0.000 
 
loop_ 
 _atom_site_label 
 _atom_site_type_symbol 
 _atom_site_fract_x 
 _atom_site_fract_y 
 _atom_site_fract_z 
 _atom_site_U_iso_or_equiv 
 _atom_site_adp_type 
 _atom_site_occupancy 
 _atom_site_symmetry_multiplicity 
 _atom_site_calc_flag 
 _atom_site_refinement_flags 
 _atom_site_disorder_assembly 
 _atom_site_disorder_group 
Ir Ir 0.562472(10) 0.635479(9) 0.715929(7) 0.02071(4) Uani 1 1 d . . . 
C13 C 0.2211(3) 0.5613(2) 0.62960(18) 0.0222(6) Uani 1 1 d . . . 
H13 H 0.2855 0.5283 0.6200 0.027 Uiso 1 1 calc R . . 
C25 C -0.0764(3) 0.9315(2) 0.7760(2) 0.0267(6) Uani 1 1 d . . . 
H25 H -0.1358 0.9695 0.7550 0.032 Uiso 1 1 calc R . . 
C14 C 0.1016(3) 0.4982(2) 0.62110(19) 0.0261(6) Uani 1 1 d . . . 
C24 C -0.0691(3) 0.9024(2) 0.85904(19) 0.0229(6) Uani 1 1 d . . . 
C15 C 0.0088(3) 0.5464(2) 0.6372(2) 0.0275(6) Uani 1 1 d . . . 
H15 H -0.0742 0.5062 0.6317 0.033 Uiso 1 1 calc R . . 
C23 C 0.0190(3) 0.8467(2) 0.88657(18) 0.0227(6) Uani 1 1 d . . . 
H23 H 0.0241 0.8250 0.9433 0.027 Uiso 1 1 calc R . . 
C16 C 0.0364(3) 0.6532(2) 0.66158(19) 0.0237(6) Uani 1 1 d . . . 
H16 H -0.0286 0.6842 0.6735 0.028 Uiso 1 1 calc R . . 
C17 C 0.4663(3) 0.8652(2) 0.67036(19) 0.0231(6) Uani 1 1 d . . . 
H17 H 0.3943 0.8961 0.6509 0.028 Uiso 1 1 calc R . . 
C19 C 0.0761(3) 0.3827(3) 0.5931(2) 0.0391(8) Uani 1 1 d . . . 
H19A H -0.0123 0.3505 0.5906 0.059 Uiso 1 1 calc R . . 
H19B H 0.1239 0.3469 0.6339 0.059 Uiso 1 1 calc R . . 
H19C H 0.1001 0.3757 0.5367 0.059 Uiso 1 1 calc R . . 
N N 0.1721(2) 0.82820(17) 0.69214(14) 0.0169(4) Uani 1 1 d . . . 
C18 C 0.4224(3) 0.7127(3) 0.52563(18) 0.0271(6) Uani 1 1 d . . . 
H18 H 0.5089 0.7478 0.5179 0.033 Uiso 1 1 calc R . . 
P2 P 0.22361(7) 0.75817(6) 0.88248(5) 0.02190(15) Uani 1 1 d . . . 
C21 C 0.0917(2) 0.8511(2) 0.75094(17) 0.0182(5) Uani 1 1 d . . . 
P1 P 0.41925(6) 0.72131(6) 0.64210(4) 0.01832(14) Uani 1 1 d . . . 
C22 C 0.1012(2) 0.8207(2) 0.83516(18) 0.0198(5) Uani 1 1 d . . . 
C171 C 0.4995(3) 0.8866(2) 0.7663(2) 0.0290(7) Uani 1 1 d . . . 
H17A H 0.5720 0.8593 0.7865 0.044 Uiso 1 1 calc R . . 
H17B H 0.4296 0.8515 0.7939 0.044 Uiso 1 1 calc R . . 
H17C H 0.5183 0.9628 0.7801 0.044 Uiso 1 1 calc R . . 
C48 C 0.6136(3) 0.4316(2) 0.7881(2) 0.0333(7) Uani 1 1 d . . . 
H48A H 0.6680 0.4040 0.8317 0.040 Uiso 1 1 calc R . . 
H48B H 0.5886 0.3794 0.7389 0.040 Uiso 1 1 calc R . . 
C47 C 0.4984(3) 0.4431(2) 0.8247(2) 0.0314(7) Uani 1 1 d . . . 
H47A H 0.5196 0.4565 0.8871 0.038 Uiso 1 1 calc R . . 
H47B H 0.4347 0.3759 0.8134 0.038 Uiso 1 1 calc R . . 
C46 C 0.4448(3) 0.5325(2) 0.78713(19) 0.0256(6) Uani 1 1 d . . . 
H46 H 0.3568 0.5096 0.7591 0.031 Uiso 1 1 calc R . . 
C172 C 0.5757(3) 0.9217(3) 0.6275(2) 0.0358(8) Uani 1 1 d . . . 
H17D H 0.5526 0.9125 0.5656 0.054 Uiso 1 1 calc R . . 
H17E H 0.6470 0.8916 0.6446 0.054 Uiso 1 1 calc R . . 
H17F H 0.5972 0.9971 0.6448 0.054 Uiso 1 1 calc R . . 
Cl Cl 0.70174(7) 0.69223(7) 0.61861(5) 0.03438(18) Uani 1 1 d . . . 
C28 C 0.1347(3) 0.6393(3) 0.9307(2) 0.0310(7) Uani 1 1 d . . . 
H28 H 0.1109 0.6633 0.9849 0.037 Uiso 1 1 calc R . . 
C27 C 0.2838(3) 0.8501(3) 0.97972(19) 0.0291(7) Uani 1 1 d . . . 
H27 H 0.2141 0.8495 1.0127 0.035 Uiso 1 1 calc R . . 
C26 C 0.0015(3) 0.9061(2) 0.72269(19) 0.0242(6) Uani 1 1 d . . . 
H26 H -0.0063 0.9265 0.6656 0.029 Uiso 1 1 calc R . . 
C44 C 0.5722(3) 0.6706(3) 0.9052(2) 0.0320(7) Uani 1 1 d . . . 
H44A H 0.5364 0.6393 0.9548 0.038 Uiso 1 1 calc R . . 
H44B H 0.5904 0.7483 0.9144 0.038 Uiso 1 1 calc R . . 
C29 C -0.1531(3) 0.9313(3) 0.9172(2) 0.0296(7) Uani 1 1 d . . . 
H29A H -0.2343 0.8819 0.9055 0.044 Uiso 1 1 calc R . . 
H29B H -0.1622 1.0032 0.9075 0.044 Uiso 1 1 calc R . . 
H29C H -0.1172 0.9277 0.9765 0.044 Uiso 1 1 calc R . . 
C45 C 0.4779(3) 0.6369(2) 0.82594(19) 0.0254(6) Uani 1 1 d . . . 
H45 H 0.4088 0.6739 0.8207 0.031 Uiso 1 1 calc R . . 
C282 C 0.2174(4) 0.5641(3) 0.9515(3) 0.0589(12) Uani 1 1 d . . . 
H28A H 0.2352 0.5346 0.8987 0.088 Uiso 1 1 calc R . . 
H28B H 0.1757 0.5068 0.9835 0.088 Uiso 1 1 calc R . . 
H28C H 0.2950 0.6021 0.9859 0.088 Uiso 1 1 calc R . . 
C281 C 0.0194(3) 0.5814(3) 0.8742(3) 0.0507(11) Uani 1 1 d . . . 
H28D H -0.0368 0.6285 0.8628 0.076 Uiso 1 1 calc R . . 
H28E H -0.0213 0.5199 0.9024 0.076 Uiso 1 1 calc R . . 
H28F H 0.0410 0.5581 0.8205 0.076 Uiso 1 1 calc R . . 
C31 C 0.1747(2) 0.8953(2) 0.62100(17) 0.0187(5) Uani 1 1 d . . . 
C43 C 0.6936(3) 0.6371(3) 0.8999(2) 0.0342(7) Uani 1 1 d . . . 
H43A H 0.7629 0.6892 0.9338 0.041 Uiso 1 1 calc R . . 
H43B H 0.6893 0.5679 0.9252 0.041 Uiso 1 1 calc R . . 
C32 C 0.1137(3) 0.8583(2) 0.54146(18) 0.0231(6) Uani 1 1 d . . . 
H32 H 0.0705 0.7864 0.5321 0.028 Uiso 1 1 calc R . . 
C33 C 0.1142(3) 0.9260(3) 0.47282(18) 0.0267(6) Uani 1 1 d . . . 
H33 H 0.0733 0.8985 0.4178 0.032 Uiso 1 1 calc R . . 
C42 C 0.7194(3) 0.6287(2) 0.8100(2) 0.0271(6) Uani 1 1 d . . . 
H42 H 0.7989 0.6763 0.7998 0.032 Uiso 1 1 calc R . . 
C34 C 0.1727(3) 1.0296(3) 0.48528(19) 0.0255(6) Uani 1 1 d . . . 
H34 H 0.1723 1.0743 0.4390 0.031 Uiso 1 1 calc R . . 
C35 C 0.2941(3) 1.1804(3) 0.5817(2) 0.0313(7) Uani 1 1 d . . . 
H35 H 0.2908 1.2265 0.5365 0.038 Uiso 1 1 calc R . . 
C41 C 0.6861(3) 0.5348(2) 0.7598(2) 0.0276(6) Uani 1 1 d . . . 
H41 H 0.7458 0.5268 0.7204 0.033 Uiso 1 1 calc R . . 
C36 C 0.3561(3) 1.2197(3) 0.6599(2) 0.0355(8) Uani 1 1 d . . . 
H36 H 0.3957 1.2926 0.6688 0.043 Uiso 1 1 calc R . . 
C37 C 0.3616(3) 1.1527(2) 0.7274(2) 0.0309(7) Uani 1 1 d . . . 
H37 H 0.4066 1.1803 0.7814 0.037 Uiso 1 1 calc R . . 
C38 C 0.3025(3) 1.0477(2) 0.71627(19) 0.0245(6) Uani 1 1 d . . . 
H38 H 0.3055 1.0039 0.7630 0.029 Uiso 1 1 calc R . . 
C182 C 0.3997(3) 0.5999(3) 0.4876(2) 0.0388(8) Uani 1 1 d . . . 
H18A H 0.3110 0.5667 0.4805 0.058 Uiso 1 1 calc R . . 
H18B H 0.4449 0.5594 0.5258 0.058 Uiso 1 1 calc R . . 
H18C H 0.4286 0.6013 0.4322 0.058 Uiso 1 1 calc R . . 
C39 C 0.2344(3) 1.0717(2) 0.56678(19) 0.0236(6) Uani 1 1 d . . . 
C181 C 0.3397(3) 0.7723(3) 0.4728(2) 0.0388(8) Uani 1 1 d . . . 
H18D H 0.3588 0.7748 0.4145 0.058 Uiso 1 1 calc R . . 
H18E H 0.3544 0.8444 0.4977 0.058 Uiso 1 1 calc R . . 
H18F H 0.2528 0.7362 0.4722 0.058 Uiso 1 1 calc R . . 
C40 C 0.2372(3) 1.0039(2) 0.63600(18) 0.0209(6) Uani 1 1 d . . . 
C271 C 0.3870(3) 0.8149(3) 1.0370(2) 0.0424(9) Uani 1 1 d . . . 
H27A H 0.4541 0.8112 1.0046 0.064 Uiso 1 1 calc R . . 
H27B H 0.3538 0.7451 1.0571 0.064 Uiso 1 1 calc R . . 
H27C H 0.4188 0.8658 1.0858 0.064 Uiso 1 1 calc R . . 
C272 C 0.3312(3) 0.9624(3) 0.9538(2) 0.0342(7) Uani 1 1 d . . . 
H27D H 0.3988 0.9642 0.9205 0.051 Uiso 1 1 calc R . . 
H27E H 0.3614 1.0099 1.0048 0.051 Uiso 1 1 calc R . . 
H27F H 0.2638 0.9853 0.9193 0.051 Uiso 1 1 calc R . . 
C12 C 0.2536(2) 0.6701(2) 0.65124(17) 0.0180(5) Uani 1 1 d . . . 
C11 C 0.1565(2) 0.7170(2) 0.66921(17) 0.0175(5) Uani 1 1 d . . . 
C90 C 0.1846(5) 0.2412(6) 0.8735(3) 0.094(2) Uani 1 1 d . . . 
H90A H 0.1860 0.1992 0.8218 0.141 Uiso 0.374(15) 1 calc PR A 2 
H90B H 0.1685 0.1943 0.9199 0.141 Uiso 0.374(15) 1 calc PR A 2 
H90C H 0.2647 0.2915 0.8891 0.141 Uiso 0.374(15) 1 calc PR A 2 
H90D H 0.1960 0.2001 0.8240 0.141 Uiso 0.626(15) 1 calc PR A 1 
H90E H 0.2157 0.2115 0.9257 0.141 Uiso 0.626(15) 1 calc PR A 1 
H90F H 0.2303 0.3146 0.8720 0.141 Uiso 0.626(15) 1 calc PR A 1 
C91A C 0.0811(19) 0.3023(18) 0.8569(14) 0.108(7) Uani 0.374(15) 1 d P A 2 
H91A H 0.0648 0.3315 0.9111 0.129 Uiso 0.374(15) 1 calc PR A 2 
H91B H 0.1049 0.3610 0.8197 0.129 Uiso 0.374(15) 1 calc PR A 2 
C92A C -0.0268(14) 0.2250(11) 0.8157(9) 0.057(4) Uani 0.374(15) 1 d P A 2 
H92A H -0.0519 0.1693 0.8553 0.069 Uiso 0.374(15) 1 calc PR A 2 
H92B H -0.0057 0.1912 0.7651 0.069 Uiso 0.374(15) 1 calc PR A 2 
C91B C -0.0055(7) 0.2798(7) 0.7893(5) 0.046(2) Uani 0.626(15) 1 d P A 1 
H91C H 0.0418 0.3530 0.7846 0.056 Uiso 0.626(15) 1 calc PR A 1 
H91D H 0.0046 0.2364 0.7400 0.056 Uiso 0.626(15) 1 calc PR A 1 
C92B C 0.0464(7) 0.2370(6) 0.8714(4) 0.043(2) Uani 0.626(15) 1 d P A 1 
H92C H 0.0007 0.1631 0.8755 0.051 Uiso 0.626(15) 1 calc PR A 1 
H92D H 0.0350 0.2794 0.9208 0.051 Uiso 0.626(15) 1 calc PR A 1 
C93 C -0.1409(5) 0.2785(6) 0.7869(5) 0.104(2) Uani 1 1 d . . . 
H93A H -0.1572 0.3218 0.8340 0.125 Uiso 0.374(15) 1 calc PR A 2 
H93B H -0.1273 0.3221 0.7374 0.125 Uiso 0.374(15) 1 calc PR A 2 
H93C H -0.1501 0.3050 0.8439 0.125 Uiso 0.626(15) 1 calc PR A 1 
H93D H -0.1589 0.3317 0.7467 0.125 Uiso 0.626(15) 1 calc PR A 1 
C94 C -0.2376(5) 0.1851(4) 0.7650(3) 0.0716(14) Uani 1 1 d . A . 
H94A H -0.2243 0.1498 0.7132 0.107 Uiso 1 1 calc R . . 
H94B H -0.3176 0.2041 0.7552 0.107 Uiso 1 1 calc R . . 
H94C H -0.2370 0.1373 0.8116 0.107 Uiso 1 1 calc R . . 
 
loop_ 
 _atom_site_aniso_label 
 _atom_site_aniso_U_11 
 _atom_site_aniso_U_22 
 _atom_site_aniso_U_33 
 _atom_site_aniso_U_23 
 _atom_site_aniso_U_13 
 _atom_site_aniso_U_12 
Ir 0.01732(6) 0.02202(6) 0.02451(6) 0.00532(4) 0.00186(4) 0.00844(4) 
C13 0.0212(14) 0.0216(14) 0.0247(15) -0.0025(11) 0.0020(11) 0.0080(11) 
C25 0.0224(14) 0.0291(15) 0.0326(17) 0.0002(13) 0.0043(12) 0.0142(12) 
C14 0.0275(15) 0.0213(14) 0.0272(15) -0.0046(12) 0.0003(12) 0.0041(11) 
C24 0.0224(14) 0.0215(14) 0.0265(15) -0.0030(11) 0.0090(11) 0.0059(11) 
C15 0.0195(14) 0.0293(16) 0.0299(16) -0.0051(13) 0.0028(12) -0.0004(11) 
C23 0.0251(14) 0.0229(14) 0.0209(14) 0.0003(11) 0.0066(11) 0.0055(11) 
C16 0.0173(13) 0.0272(15) 0.0272(15) -0.0027(12) 0.0044(11) 0.0064(11) 
C17 0.0186(13) 0.0213(14) 0.0308(16) 0.0057(12) 0.0033(11) 0.0072(11) 
C19 0.0395(19) 0.0240(16) 0.049(2) -0.0114(15) 0.0011(16) 0.0019(14) 
N 0.0174(11) 0.0196(11) 0.0162(11) 0.0003(9) 0.0042(8) 0.0080(9) 
C18 0.0253(15) 0.0424(18) 0.0206(14) 0.0064(13) 0.0064(11) 0.0201(13) 
P2 0.0228(4) 0.0267(4) 0.0190(4) 0.0045(3) 0.0041(3) 0.0108(3) 
C21 0.0168(13) 0.0194(13) 0.0193(13) -0.0028(10) 0.0026(10) 0.0066(10) 
P1 0.0160(3) 0.0212(3) 0.0199(3) 0.0031(3) 0.0032(3) 0.0082(3) 
C22 0.0188(13) 0.0182(13) 0.0224(14) 0.0006(11) 0.0017(10) 0.0050(10) 
C171 0.0295(16) 0.0220(15) 0.0335(17) 0.0009(12) 0.0032(13) 0.0027(12) 
C48 0.0399(19) 0.0241(16) 0.0389(19) 0.0034(13) 0.0026(14) 0.0156(14) 
C47 0.0375(18) 0.0213(15) 0.0348(18) 0.0068(13) 0.0060(14) 0.0050(13) 
C46 0.0236(15) 0.0256(15) 0.0273(15) 0.0086(12) 0.0047(12) 0.0042(11) 
C172 0.0292(17) 0.0317(17) 0.048(2) 0.0115(15) 0.0144(15) 0.0045(13) 
Cl 0.0210(3) 0.0496(5) 0.0392(4) 0.0181(4) 0.0108(3) 0.0166(3) 
C28 0.0349(17) 0.0339(17) 0.0281(16) 0.0111(13) 0.0115(13) 0.0114(14) 
C27 0.0289(16) 0.0398(18) 0.0193(15) -0.0001(13) 0.0036(12) 0.0095(13) 
C26 0.0239(14) 0.0295(15) 0.0225(14) 0.0020(12) 0.0024(11) 0.0133(12) 
C44 0.0399(18) 0.0316(17) 0.0251(16) 0.0018(13) 0.0040(13) 0.0100(14) 
C29 0.0292(16) 0.0296(16) 0.0345(17) 0.0010(13) 0.0129(13) 0.0115(13) 
C45 0.0252(15) 0.0281(15) 0.0265(15) 0.0068(12) 0.0073(12) 0.0108(12) 
C282 0.046(2) 0.044(2) 0.087(3) 0.037(2) -0.001(2) 0.0139(18) 
C281 0.038(2) 0.035(2) 0.072(3) 0.0216(19) -0.0100(19) 0.0014(16) 
C31 0.0181(13) 0.0233(14) 0.0177(13) 0.0010(10) 0.0029(10) 0.0107(10) 
C43 0.0365(18) 0.0306(17) 0.0336(18) 0.0023(14) -0.0071(14) 0.0110(14) 
C32 0.0220(14) 0.0283(15) 0.0210(14) -0.0008(11) 0.0014(11) 0.0117(11) 
C33 0.0223(14) 0.0449(19) 0.0159(14) 0.0022(12) 0.0000(11) 0.0155(13) 
C42 0.0193(14) 0.0274(15) 0.0347(17) 0.0052(13) -0.0043(12) 0.0104(11) 
C34 0.0205(14) 0.0406(18) 0.0219(14) 0.0109(13) 0.0078(11) 0.0167(12) 
C35 0.0285(16) 0.0328(17) 0.0367(18) 0.0133(14) 0.0103(13) 0.0112(13) 
C41 0.0202(14) 0.0286(16) 0.0392(18) 0.0089(13) 0.0047(12) 0.0153(12) 
C36 0.0381(19) 0.0216(15) 0.046(2) 0.0065(14) 0.0086(15) 0.0037(13) 
C37 0.0324(17) 0.0277(16) 0.0313(17) -0.0027(13) 0.0003(13) 0.0074(13) 
C38 0.0268(15) 0.0249(15) 0.0233(15) 0.0037(12) 0.0028(11) 0.0097(12) 
C182 0.046(2) 0.052(2) 0.0252(17) -0.0063(15) 0.0083(14) 0.0237(17) 
C39 0.0178(13) 0.0302(15) 0.0272(15) 0.0070(12) 0.0063(11) 0.0120(11) 
C181 0.0411(19) 0.066(2) 0.0221(16) 0.0122(16) 0.0088(14) 0.0349(18) 
C40 0.0204(13) 0.0248(14) 0.0206(14) 0.0017(11) 0.0048(10) 0.0105(11) 
C271 0.041(2) 0.052(2) 0.0314(19) 0.0021(16) -0.0068(15) 0.0124(17) 
C272 0.0330(18) 0.0375(18) 0.0308(17) -0.0066(14) 0.0020(13) 0.0080(14) 
C12 0.0143(12) 0.0216(13) 0.0184(13) 0.0010(10) 0.0009(10) 0.0058(10) 
C11 0.0187(13) 0.0191(13) 0.0156(12) -0.0018(10) 0.0011(10) 0.0073(10) 
C90 0.076(4) 0.169(7) 0.052(3) -0.011(4) 0.015(3) 0.057(4) 
C91A 0.102(15) 0.082(14) 0.118(16) 0.028(12) -0.001(12) -0.014(11) 
C92A 0.089(10) 0.030(7) 0.047(8) 0.005(6) -0.006(7) 0.012(6) 
C91B 0.056(4) 0.042(5) 0.042(4) 0.003(3) 0.011(3) 0.009(3) 
C92B 0.051(4) 0.037(4) 0.042(4) 0.001(3) 0.023(3) 0.004(3) 
C93 0.068(4) 0.135(6) 0.107(5) -0.051(5) 0.007(3) 0.030(4) 
C94 0.092(4) 0.070(3) 0.058(3) 0.002(3) 0.004(3) 0.035(3) 
 
_geom_special_details 
; 
 All esds (except the esd in the dihedral angle between two l.s. planes) 
 are estimated using the full covariance matrix.  The cell esds are taken 
 into account individually in the estimation of esds in distances, angles 
 and torsion angles; correlations between esds in cell parameters are only 
 used when they are defined by crystal symmetry.  An approximate (isotropic) 
 treatment of cell esds is used for estimating esds involving l.s. planes. 
; 
 
loop_ 
 _geom_bond_atom_site_label_1 
 _geom_bond_atom_site_label_2 
 _geom_bond_distance 
 _geom_bond_site_symmetry_2 
 _geom_bond_publ_flag 
Ir C45 2.105(3) . ? 
Ir C46 2.123(3) . ? 
Ir C42 2.168(3) . ? 
Ir C41 2.180(3) . ? 
Ir Cl 2.3631(8) . ? 
Ir P1 2.3650(7) . ? 
C13 C14 1.390(4) . ? 
C13 C12 1.403(4) . ? 
C13 H13 0.9500 . ? 
C25 C24 1.380(4) . ? 
C25 C26 1.385(4) . ? 
C25 H25 0.9500 . ? 
C14 C15 1.384(4) . ? 
C14 C19 1.511(4) . ? 
C24 C23 1.388(4) . ? 
C24 C29 1.509(4) . ? 
C15 C16 1.389(4) . ? 
C15 H15 0.9500 . ? 
C23 C22 1.405(4) . ? 
C23 H23 0.9500 . ? 
C16 C11 1.400(4) . ? 
C16 H16 0.9500 . ? 
C17 C171 1.523(4) . ? 
C17 C172 1.535(4) . ? 
C17 P1 1.855(3) . ? 
C17 H17 1.0000 . ? 
C19 H19A 0.9800 . ? 
C19 H19B 0.9800 . ? 
C19 H19C 0.9800 . ? 
N C31 1.447(3) . ? 
N C11 1.452(3) . ? 
N C21 1.457(3) . ? 
C18 C181 1.524(4) . ? 
C18 C182 1.529(5) . ? 
C18 P1 1.859(3) . ? 
C18 H18 1.0000 . ? 
P2 C22 1.840(3) . ? 
P2 C27 1.880(3) . ? 
P2 C28 1.883(3) . ? 
C21 C22 1.403(4) . ? 
C21 C26 1.404(4) . ? 
P1 C12 1.854(3) . ? 
C171 H17A 0.9800 . ? 
C171 H17B 0.9800 . ? 
C171 H17C 0.9800 . ? 
C48 C41 1.518(4) . ? 
C48 C47 1.526(5) . ? 
C48 H48A 0.9900 . ? 
C48 H48B 0.9900 . ? 
C47 C46 1.529(4) . ? 
C47 H47A 0.9900 . ? 
C47 H47B 0.9900 . ? 
C46 C45 1.427(4) . ? 
C46 H46 1.0000 . ? 
C172 H17D 0.9800 . ? 
C172 H17E 0.9800 . ? 
C172 H17F 0.9800 . ? 
C28 C281 1.500(5) . ? 
C28 C282 1.513(5) . ? 
C28 H28 1.0000 . ? 
C27 C272 1.527(5) . ? 
C27 C271 1.536(4) . ? 
C27 H27 1.0000 . ? 
C26 H26 0.9500 . ? 
C44 C45 1.515(4) . ? 
C44 C43 1.537(5) . ? 
C44 H44A 0.9900 . ? 
C44 H44B 0.9900 . ? 
C29 H29A 0.9800 . ? 
C29 H29B 0.9800 . ? 
C29 H29C 0.9800 . ? 
C45 H45 1.0000 . ? 
C282 H28A 0.9800 . ? 
C282 H28B 0.9800 . ? 
C282 H28C 0.9800 . ? 
C281 H28D 0.9800 . ? 
C281 H28E 0.9800 . ? 
C281 H28F 0.9800 . ? 
C31 C32 1.372(4) . ? 
C31 C40 1.427(4) . ? 
C43 C42 1.505(5) . ? 
C43 H43A 0.9900 . ? 
C43 H43B 0.9900 . ? 
C32 C33 1.420(4) . ? 
C32 H32 0.9500 . ? 
C33 C34 1.357(5) . ? 
C33 H33 0.9500 . ? 
C42 C41 1.391(4) . ? 
C42 H42 1.0000 . ? 
C34 C39 1.416(4) . ? 
C34 H34 0.9500 . ? 
C35 C36 1.365(5) . ? 
C35 C39 1.420(4) . ? 
C35 H35 0.9500 . ? 
C41 H41 1.0000 . ? 
C36 C37 1.405(5) . ? 
C36 H36 0.9500 . ? 
C37 C38 1.372(4) . ? 
C37 H37 0.9500 . ? 
C38 C40 1.417(4) . ? 
C38 H38 0.9500 . ? 
C182 H18A 0.9800 . ? 
C182 H18B 0.9800 . ? 
C182 H18C 0.9800 . ? 
C39 C40 1.430(4) . ? 
C181 H18D 0.9800 . ? 
C181 H18E 0.9800 . ? 
C181 H18F 0.9800 . ? 
C271 H27A 0.9800 . ? 
C271 H27B 0.9800 . ? 
C271 H27C 0.9800 . ? 
C272 H27D 0.9800 . ? 
C272 H27E 0.9800 . ? 
C272 H27F 0.9800 . ? 
C12 C11 1.424(4) . ? 
C90 C92B 1.536(8) . ? 
C90 C91A 1.55(2) . ? 
C90 H90A 0.9800 . ? 
C90 H90B 0.9800 . ? 
C90 H90C 0.9800 . ? 
C90 H90D 0.9800 . ? 
C90 H90E 0.9800 . ? 
C90 H90F 0.9800 . ? 
C91A C92A 1.45(3) . ? 
C91A H91A 0.9900 . ? 
C91A H91B 0.9900 . ? 
C92A C93 1.614(14) . ? 
C92A H92A 0.9900 . ? 
C92A H92B 0.9900 . ? 
C91B C93 1.513(9) . ? 
C91B C92B 1.528(12) . ? 
C91B H91C 0.9900 . ? 
C91B H91D 0.9900 . ? 
C92B H92C 0.9900 . ? 
C92B H92D 0.9900 . ? 
C93 C94 1.433(8) . ? 
C93 H93A 0.9900 . ? 
C93 H93B 0.9900 . ? 
C93 H93C 0.9900 . ? 
C93 H93D 0.9900 . ? 
C94 H94A 0.9800 . ? 
C94 H94B 0.9800 . ? 
C94 H94C 0.9800 . ? 
 
loop_ 
 _geom_angle_atom_site_label_1 
 _geom_angle_atom_site_label_2 
 _geom_angle_atom_site_label_3 
 _geom_angle 
 _geom_angle_site_symmetry_1 
 _geom_angle_site_symmetry_3 
 _geom_angle_publ_flag 
C45 Ir C46 39.45(12) . . ? 
C45 Ir C42 81.33(12) . . ? 
C46 Ir C42 89.38(12) . . ? 
C45 Ir C41 97.54(12) . . ? 
C46 Ir C41 81.07(11) . . ? 
C42 Ir C41 37.30(12) . . ? 
C45 Ir Cl 158.84(9) . . ? 
C46 Ir Cl 159.74(9) . . ? 
C42 Ir Cl 88.53(9) . . ? 
C41 Ir Cl 85.10(9) . . ? 
C45 Ir P1 90.77(8) . . ? 
C46 Ir P1 100.28(8) . . ? 
C42 Ir P1 153.86(8) . . ? 
C41 Ir P1 168.00(9) . . ? 
Cl Ir P1 90.28(3) . . ? 
C14 C13 C12 124.8(3) . . ? 
C14 C13 H13 117.6 . . ? 
C12 C13 H13 117.6 . . ? 
C24 C25 C26 121.1(3) . . ? 
C24 C25 H25 119.4 . . ? 
C26 C25 H25 119.4 . . ? 
C15 C14 C13 117.2(3) . . ? 
C15 C14 C19 122.4(3) . . ? 
C13 C14 C19 120.4(3) . . ? 
C25 C24 C23 117.2(3) . . ? 
C25 C24 C29 121.0(3) . . ? 
C23 C24 C29 121.8(3) . . ? 
C14 C15 C16 120.4(3) . . ? 
C14 C15 H15 119.8 . . ? 
C16 C15 H15 119.8 . . ? 
C24 C23 C22 123.6(3) . . ? 
C24 C23 H23 118.2 . . ? 
C22 C23 H23 118.2 . . ? 
C15 C16 C11 122.4(3) . . ? 
C15 C16 H16 118.8 . . ? 
C11 C16 H16 118.8 . . ? 
C171 C17 C172 109.1(3) . . ? 
C171 C17 P1 110.8(2) . . ? 
C172 C17 P1 112.8(2) . . ? 
C171 C17 H17 108.0 . . ? 
C172 C17 H17 108.0 . . ? 
P1 C17 H17 108.0 . . ? 
C14 C19 H19A 109.5 . . ? 
C14 C19 H19B 109.5 . . ? 
H19A C19 H19B 109.5 . . ? 
C14 C19 H19C 109.5 . . ? 
H19A C19 H19C 109.5 . . ? 
H19B C19 H19C 109.5 . . ? 
C31 N C11 114.6(2) . . ? 
C31 N C21 112.3(2) . . ? 
C11 N C21 115.0(2) . . ? 
C181 C18 C182 109.9(3) . . ? 
C181 C18 P1 115.2(2) . . ? 
C182 C18 P1 113.9(2) . . ? 
C181 C18 H18 105.6 . . ? 
C182 C18 H18 105.6 . . ? 
P1 C18 H18 105.6 . . ? 
C22 P2 C27 98.44(13) . . ? 
C22 P2 C28 102.90(14) . . ? 
C27 P2 C28 100.61(15) . . ? 
C22 C21 C26 118.4(2) . . ? 
C22 C21 N 122.6(2) . . ? 
C26 C21 N 118.9(2) . . ? 
C12 P1 C17 110.08(12) . . ? 
C12 P1 C18 103.58(13) . . ? 
C17 P1 C18 103.52(14) . . ? 
C12 P1 Ir 117.37(9) . . ? 
C17 P1 Ir 110.12(9) . . ? 
C18 P1 Ir 111.13(9) . . ? 
C21 C22 C23 118.0(2) . . ? 
C21 C22 P2 122.6(2) . . ? 
C23 C22 P2 119.2(2) . . ? 
C17 C171 H17A 109.5 . . ? 
C17 C171 H17B 109.5 . . ? 
H17A C171 H17B 109.5 . . ? 
C17 C171 H17C 109.5 . . ? 
H17A C171 H17C 109.5 . . ? 
H17B C171 H17C 109.5 . . ? 
C41 C48 C47 112.9(2) . . ? 
C41 C48 H48A 109.0 . . ? 
C47 C48 H48A 109.0 . . ? 
C41 C48 H48B 109.0 . . ? 
C47 C48 H48B 109.0 . . ? 
H48A C48 H48B 107.8 . . ? 
C48 C47 C46 112.8(3) . . ? 
C48 C47 H47A 109.0 . . ? 
C46 C47 H47A 109.0 . . ? 
C48 C47 H47B 109.0 . . ? 
C46 C47 H47B 109.0 . . ? 
H47A C47 H47B 107.8 . . ? 
C45 C46 C47 122.4(3) . . ? 
C45 C46 Ir 69.60(16) . . ? 
C47 C46 Ir 114.5(2) . . ? 
C45 C46 H46 114.3 . . ? 
C47 C46 H46 114.3 . . ? 
Ir C46 H46 114.3 . . ? 
C17 C172 H17D 109.5 . . ? 
C17 C172 H17E 109.5 . . ? 
H17D C172 H17E 109.5 . . ? 
C17 C172 H17F 109.5 . . ? 
H17D C172 H17F 109.5 . . ? 
H17E C172 H17F 109.5 . . ? 
C281 C28 C282 108.8(3) . . ? 
C281 C28 P2 113.6(2) . . ? 
C282 C28 P2 109.1(2) . . ? 
C281 C28 H28 108.4 . . ? 
C282 C28 H28 108.4 . . ? 
P2 C28 H28 108.4 . . ? 
C272 C27 C271 110.1(3) . . ? 
C272 C27 P2 110.1(2) . . ? 
C271 C27 P2 111.4(2) . . ? 
C272 C27 H27 108.4 . . ? 
C271 C27 H27 108.4 . . ? 
P2 C27 H27 108.4 . . ? 
C25 C26 C21 121.6(3) . . ? 
C25 C26 H26 119.2 . . ? 
C21 C26 H26 119.2 . . ? 
C45 C44 C43 112.9(3) . . ? 
C45 C44 H44A 109.0 . . ? 
C43 C44 H44A 109.0 . . ? 
C45 C44 H44B 109.0 . . ? 
C43 C44 H44B 109.0 . . ? 
H44A C44 H44B 107.8 . . ? 
C24 C29 H29A 109.5 . . ? 
C24 C29 H29B 109.5 . . ? 
H29A C29 H29B 109.5 . . ? 
C24 C29 H29C 109.5 . . ? 
H29A C29 H29C 109.5 . . ? 
H29B C29 H29C 109.5 . . ? 
C46 C45 C44 123.6(3) . . ? 
C46 C45 Ir 70.95(17) . . ? 
C44 C45 Ir 111.9(2) . . ? 
C46 C45 H45 114.2 . . ? 
C44 C45 H45 114.2 . . ? 
Ir C45 H45 114.2 . . ? 
C28 C282 H28A 109.5 . . ? 
C28 C282 H28B 109.5 . . ? 
H28A C282 H28B 109.5 . . ? 
C28 C282 H28C 109.5 . . ? 
H28A C282 H28C 109.5 . . ? 
H28B C282 H28C 109.5 . . ? 
C28 C281 H28D 109.5 . . ? 
C28 C281 H28E 109.5 . . ? 
H28D C281 H28E 109.5 . . ? 
C28 C281 H28F 109.5 . . ? 
H28D C281 H28F 109.5 . . ? 
H28E C281 H28F 109.5 . . ? 
C32 C31 C40 119.8(3) . . ? 
C32 C31 N 121.7(3) . . ? 
C40 C31 N 118.4(2) . . ? 
C42 C43 C44 112.4(3) . . ? 
C42 C43 H43A 109.1 . . ? 
C44 C43 H43A 109.1 . . ? 
C42 C43 H43B 109.1 . . ? 
C44 C43 H43B 109.1 . . ? 
H43A C43 H43B 107.8 . . ? 
C31 C32 C33 121.0(3) . . ? 
C31 C32 H32 119.5 . . ? 
C33 C32 H32 119.5 . . ? 
C34 C33 C32 120.4(3) . . ? 
C34 C33 H33 119.8 . . ? 
C32 C33 H33 119.8 . . ? 
C41 C42 C43 123.4(3) . . ? 
C41 C42 Ir 71.82(17) . . ? 
C43 C42 Ir 113.1(2) . . ? 
C41 C42 H42 113.8 . . ? 
C43 C42 H42 113.8 . . ? 
Ir C42 H42 113.8 . . ? 
C33 C34 C39 120.5(3) . . ? 
C33 C34 H34 119.8 . . ? 
C39 C34 H34 119.8 . . ? 
C36 C35 C39 121.0(3) . . ? 
C36 C35 H35 119.5 . . ? 
C39 C35 H35 119.5 . . ? 
C42 C41 C48 123.7(3) . . ? 
C42 C41 Ir 70.88(16) . . ? 
C48 C41 Ir 110.64(19) . . ? 
C42 C41 H41 114.5 . . ? 
C48 C41 H41 114.5 . . ? 
Ir C41 H41 114.5 . . ? 
C35 C36 C37 120.2(3) . . ? 
C35 C36 H36 119.9 . . ? 
C37 C36 H36 119.9 . . ? 
C38 C37 C36 120.7(3) . . ? 
C38 C37 H37 119.7 . . ? 
C36 C37 H37 119.7 . . ? 
C37 C38 C40 120.9(3) . . ? 
C37 C38 H38 119.6 . . ? 
C40 C38 H38 119.6 . . ? 
C18 C182 H18A 109.5 . . ? 
C18 C182 H18B 109.5 . . ? 
H18A C182 H18B 109.5 . . ? 
C18 C182 H18C 109.5 . . ? 
H18A C182 H18C 109.5 . . ? 
H18B C182 H18C 109.5 . . ? 
C34 C39 C35 121.4(3) . . ? 
C34 C39 C40 119.7(3) . . ? 
C35 C39 C40 118.9(3) . . ? 
C18 C181 H18D 109.5 . . ? 
C18 C181 H18E 109.5 . . ? 
H18D C181 H18E 109.5 . . ? 
C18 C181 H18F 109.5 . . ? 
H18D C181 H18F 109.5 . . ? 
H18E C181 H18F 109.5 . . ? 
C38 C40 C31 123.0(3) . . ? 
C38 C40 C39 118.4(3) . . ? 
C31 C40 C39 118.6(3) . . ? 
C27 C271 H27A 109.5 . . ? 
C27 C271 H27B 109.5 . . ? 
H27A C271 H27B 109.5 . . ? 
C27 C271 H27C 109.5 . . ? 
H27A C271 H27C 109.5 . . ? 
H27B C271 H27C 109.5 . . ? 
C27 C272 H27D 109.5 . . ? 
C27 C272 H27E 109.5 . . ? 
H27D C272 H27E 109.5 . . ? 
C27 C272 H27F 109.5 . . ? 
H27D C272 H27F 109.5 . . ? 
H27E C272 H27F 109.5 . . ? 
C13 C12 C11 116.6(2) . . ? 
C13 C12 P1 108.63(19) . . ? 
C11 C12 P1 134.6(2) . . ? 
C16 C11 C12 118.5(2) . . ? 
C16 C11 N 116.9(2) . . ? 
C12 C11 N 124.6(2) . . ?  
C92B C90 H90A 103.1 . . ? 
C91A C90 H90A 109.5 . . ? 
C92B C90 H90B 81.3 . . ? 
C91A C90 H90B 109.5 . . ? 
H90A C90 H90B 109.5 . . ? 
C92B C90 H90C 139.1 . . ? 
C91A C90 H90C 109.5 . . ? 
H90A C90 H90C 109.5 . . ? 
H90B C90 H90C 109.5 . . ? 
C92B C90 H90D 109.5 . . ? 
C91A C90 H90D 115.1 . . ?  
H90B C90 H90D 109.2 . . ? 
H90C C90 H90D 103.9 . . ? 
C92B C90 H90E 109.5 . . ? 
C91A C90 H90E 129.8 . . ? 
H90A C90 H90E 113.2 . . ? 
H90C C90 H90E 79.9 . . ? 
H90D C90 H90E 109.5 . . ? 
C92B C90 H90F 109.5 . . ? 
C91A C90 H90F 76.4 . . ? 
H90A C90 H90F 112.0 . . ? 
H90B C90 H90F 133.0 . . ? 
H90D C90 H90F 109.5 . . ? 
H90E C90 H90F 109.5 . . ? 
C92A C91A C90 105.2(16) . . ? 
C92A C91A H91A 110.7 . . ? 
C90 C91A H91A 110.7 . . ? 
C92A C91A H91B 110.7 . . ? 
C90 C91A H91B 110.7 . . ? 
H91A C91A H91B 108.8 . . ? 
C91A C92A C93 111.4(13) . . ? 
C91A C92A H92A 109.3 . . ? 
C93 C92A H92A 109.3 . . ? 
C91A C92A H92B 109.3 . . ? 
C93 C92A H92B 109.3 . . ? 
H92A C92A H92B 108.0 . . ? 
C93 C91B C92B 111.4(7) . . ? 
C93 C91B H91C 109.3 . . ? 
C92B C91B H91C 109.3 . . ? 
C93 C91B H91D 109.3 . . ? 
C92B C91B H91D 109.3 . . ? 
H91C C91B H91D 108.0 . . ? 
C91B C92B C90 110.6(6) . . ? 
C91B C92B H92C 109.5 . . ? 
C90 C92B H92C 109.5 . . ? 
C91B C92B H92D 109.5 . . ? 
C90 C92B H92D 109.5 . . ? 
H92C C92B H92D 108.1 . . ? 
C94 C93 C91B 122.8(6) . . ? 
C94 C93 C92A 99.4(7) . . ? 
C94 C93 H93A 111.9 . . ? 
C91B C93 H93A 113.4 . . ? 
C92A C93 H93A 111.9 . . ? 
C94 C93 H93B 111.9 . . ? 
C91B C93 H93B 83.3 . . ? 
C92A C93 H93B 111.9 . . ? 
H93A C93 H93B 109.6 . . ? 
C94 C93 H93C 106.6 . . ? 
C91B C93 H93C 106.6 . . ? 
C92A C93 H93C 97.9 . . ? 
H93B C93 H93C 125.4 . . ? 
C94 C93 H93D 106.6 . . ? 
C91B C93 H93D 106.6 . . ? 
C92A C93 H93D 136.9 . . ? 
H93A C93 H93D 89.6 . . ? 
H93C C93 H93D 106.6 . . ? 
C93 C94 H94A 109.5 . . ? 
C93 C94 H94B 109.5 . . ? 
H94A C94 H94B 109.5 . . ? 
C93 C94 H94C 109.5 . . ? 
H94A C94 H94C 109.5 . . ? 
H94B C94 H94C 109.5 . . ? 
 
_diffrn_measured_fraction_theta_max    0.987 
_diffrn_reflns_theta_full              25.00 
_diffrn_measured_fraction_theta_full   0.999 
_refine_diff_density_max    3.033 
_refine_diff_density_min   -1.120 
_refine_diff_density_rms    0.099 
_iucr_refine_instructions_details
;
TITL SV2 in P-1
CELL 0.71073  11.2348  13.0430  15.9073  91.398  97.941 103.314
ZERR    2.00   0.0009   0.0010   0.0012   0.001   0.001   0.001
LATT  1
SFAC C H N P CL IR
UNIT 98 142 2 4 2 2
OMIT 1 -2 9
 
LIST 6 ! automatically inserted. Change 6 to 4 for CHECKCIF!!
TEMP -153.16
ACTA 50
size 0.07 0.062 0.031
 
L.S. 4
BOND $H
FMAP 2
PLAN 20
OMIT 0 0 1
OMIT 1 3 1
 
WGHT    0.022600    3.033700
FVAR       0.12648   0.37418
IR    6    0.562472    0.635479    0.715929    11.00000    0.01732    0.02202 =
         0.02451    0.00532    0.00186    0.00844
C13   1    0.221069    0.561271    0.629595    11.00000    0.02122    0.02158 =
         0.02468   -0.00245    0.00196    0.00799
AFIX  43
H13   2    0.285460    0.528257    0.620044    11.00000   -1.20000
AFIX   0
 
C25   1   -0.076367    0.931464    0.775973    11.00000    0.02244    0.02909 =
         0.03262    0.00015    0.00425    0.01422
AFIX  43
H25   2   -0.135827    0.969481    0.754996    11.00000   -1.20000
AFIX   0
C14   1    0.101570    0.498208    0.621099    11.00000    0.02750    0.02132 =
         0.02718   -0.00460    0.00031    0.00406
 
C24   1   -0.069084    0.902424    0.859036    11.00000    0.02238    0.02146 =
         0.02647   -0.00304    0.00900    0.00589
C15   1    0.008791    0.546380    0.637242    11.00000    0.01951    0.02932 =
         0.02989   -0.00505    0.00277   -0.00043
AFIX  43
H15   2   -0.074230    0.506162    0.631652    11.00000   -1.20000
AFIX   0
 
C23   1    0.019050    0.846703    0.886572    11.00000    0.02510    0.02286 =
         0.02091    0.00027    0.00665    0.00550
AFIX  43
H23   2    0.024092    0.824951    0.943256    11.00000   -1.20000
AFIX   0
C16   1    0.036398    0.653220    0.661576    11.00000    0.01731    0.02719 =
         0.02719   -0.00265    0.00438    0.00643
AFIX  43
H16   2   -0.028612    0.684168    0.673478    11.00000   -1.20000
AFIX   0
 
C17   1    0.466321    0.865238    0.670363    11.00000    0.01857    0.02131 =
         0.03080    0.00566    0.00333    0.00724
AFIX  13
H17   2    0.394303    0.896144    0.650916    11.00000   -1.20000
AFIX   0
 
C19   1    0.076077    0.382680    0.593136    11.00000    0.03954    0.02399 =
         0.04869   -0.01145    0.00114    0.00192
AFIX 137
H19A  2   -0.012323    0.350499    0.590637    11.00000   -1.50000
H19B  2    0.123889    0.346919    0.633895    11.00000   -1.50000
H19C  2    0.100134    0.375705    0.536742    11.00000   -1.50000
AFIX   0
N     3    0.172070    0.828197    0.692143    11.00000    0.01739    0.01956 =
         0.01618    0.00035    0.00424    0.00803
C18   1    0.422382    0.712742    0.525631    11.00000    0.02533    0.04243 =
         0.02057    0.00644    0.00637    0.02006
AFIX  13
H18   2    0.508891    0.747845    0.517922    11.00000   -1.20000
AFIX   0
 
P2    4    0.223609    0.758166    0.882484    11.00000    0.02283    0.02672 =
         0.01905    0.00446    0.00406    0.01082
C21   1    0.091697    0.851059    0.750940    11.00000    0.01683    0.01941 =
         0.01932   -0.00278    0.00262    0.00658
P1    4    0.419250    0.721306    0.642105    11.00000    0.01598    0.02124 =
         0.01989    0.00312    0.00323    0.00820
C22   1    0.101188    0.820739    0.835157    11.00000    0.01884    0.01816 =
         0.02236    0.00063    0.00174    0.00502
C171  1    0.499505    0.886606    0.766262    11.00000    0.02949    0.02201 =
         0.03354    0.00092    0.00322    0.00270
AFIX 137
H17A  2    0.571965    0.859283    0.786535    11.00000   -1.50000
H17B  2    0.429568    0.851482    0.793922    11.00000   -1.50000
H17C  2    0.518341    0.962806    0.780058    11.00000   -1.50000
AFIX   0
 
C48   1    0.613648    0.431591    0.788084    11.00000    0.03988    0.02414 =
         0.03890    0.00344    0.00262    0.01555
AFIX  23
H48A  2    0.667997    0.403950    0.831668    11.00000   -1.20000
H48B  2    0.588646    0.379440    0.738852    11.00000   -1.20000
AFIX   0
C47   1    0.498426    0.443051    0.824666    11.00000    0.03745    0.02127 =
         0.03484    0.00677    0.00603    0.00497
AFIX  23
H47A  2    0.519578    0.456531    0.887078    11.00000   -1.20000
H47B  2    0.434710    0.375887    0.813356    11.00000   -1.20000
AFIX   0
 
C46   1    0.444787    0.532465    0.787127    11.00000    0.02365    0.02561 =
         0.02731    0.00864    0.00470    0.00421
AFIX  13
H46   2    0.356832    0.509648    0.759117    11.00000   -1.20000
AFIX   0
C172  1    0.575670    0.921708    0.627456    11.00000    0.02919    0.03172 =
         0.04813    0.01154    0.01436    0.00445
AFIX 137
H17D  2    0.552615    0.912479    0.565560    11.00000   -1.50000
H17E  2    0.646977    0.891590    0.644618    11.00000   -1.50000
H17F  2    0.597218    0.997102    0.644801    11.00000   -1.50000
AFIX   0
CL    5    0.701739    0.692234    0.618613    11.00000    0.02104    0.04963 =
         0.03916    0.01813    0.01076    0.01663
C28   1    0.134676    0.639348    0.930718    11.00000    0.03493    0.03393 =
         0.02813    0.01107    0.01152    0.01137
AFIX  13
H28   2    0.110860    0.663295    0.984861    11.00000   -1.20000
AFIX   0
C27   1    0.283791    0.850091    0.979720    11.00000    0.02891    0.03981 =
         0.01925   -0.00012    0.00364    0.00952
AFIX  13
H27   2    0.214102    0.849467    1.012746    11.00000   -1.20000
AFIX   0
C26   1    0.001501    0.906140    0.722691    11.00000    0.02393    0.02950 =
         0.02248    0.00201    0.00240    0.01332
AFIX  43
H26   2   -0.006306    0.926534    0.665643    11.00000   -1.20000
AFIX   0
 
C44   1    0.572239    0.670550    0.905204    11.00000    0.03987    0.03156 =
         0.02510    0.00179    0.00395    0.00995
AFIX  23
H44A  2    0.536391    0.639271    0.954844    11.00000   -1.20000
H44B  2    0.590440    0.748281    0.914397    11.00000   -1.20000
AFIX   0
C29   1   -0.153056    0.931336    0.917243    11.00000    0.02916    0.02960 =
         0.03446    0.00099    0.01285    0.01151
AFIX 137
H29A  2   -0.234337    0.881897    0.905481    11.00000   -1.50000
H29B  2   -0.162206    1.003210    0.907514    11.00000   -1.50000
H29C  2   -0.117153    0.927674    0.976531    11.00000   -1.50000
AFIX   0
 
C45   1    0.477920    0.636866    0.825938    11.00000    0.02515    0.02814 =
         0.02649    0.00678    0.00726    0.01079
AFIX  13
H45   2    0.408842    0.673941    0.820656    11.00000   -1.20000
AFIX   0
C282  1    0.217430    0.564099    0.951546    11.00000    0.04628    0.04393 =
         0.08661    0.03705   -0.00084    0.01392
AFIX 137
H28A  2    0.235235    0.534621    0.898708    11.00000   -1.50000
H28B  2    0.175665    0.506793    0.983514    11.00000   -1.50000
H28C  2    0.295001    0.602134    0.985907    11.00000   -1.50000
AFIX   0
C281  1    0.019432    0.581431    0.874211    11.00000    0.03756    0.03470 =
         0.07200    0.02163   -0.01002    0.00136
AFIX 137
H28D  2   -0.036779    0.628465    0.862773    11.00000   -1.50000
H28E  2   -0.021265    0.519889    0.902446    11.00000   -1.50000
H28F  2    0.041045    0.558099    0.820494    11.00000   -1.50000
AFIX   0
C31   1    0.174658    0.895344    0.620998    11.00000    0.01806    0.02332 =
         0.01775    0.00099    0.00291    0.01074
 
C43   1    0.693630    0.637057    0.899917    11.00000    0.03648    0.03057 =
         0.03362    0.00232   -0.00705    0.01100
AFIX  23
H43A  2    0.762875    0.689186    0.933758    11.00000   -1.20000
H43B  2    0.689270    0.567892    0.925153    11.00000   -1.20000
AFIX   0
C32   1    0.113725    0.858346    0.541456    11.00000    0.02203    0.02835 =
         0.02099   -0.00082    0.00140    0.01166
AFIX  43
H32   2    0.070530    0.786361    0.532138    11.00000   -1.20000
AFIX   0
 
C33   1    0.114197    0.925956    0.472818    11.00000    0.02229    0.04493 =
         0.01592    0.00216    0.00004    0.01546
AFIX  43
H33   2    0.073283    0.898450    0.417840    11.00000   -1.20000
AFIX   0
 
C42   1    0.719360    0.628711    0.809959    11.00000    0.01927    0.02739 =
         0.03472    0.00515   -0.00426    0.01040
AFIX  13
H42   2    0.798932    0.676292    0.799771    11.00000   -1.20000
AFIX   0
C34   1    0.172748    1.029640    0.485284    11.00000    0.02049    0.04063 =
         0.02195    0.01093    0.00783    0.01672
AFIX  43
H34   2    0.172337    1.074280    0.438992    11.00000   -1.20000
AFIX   0
 
C35   1    0.294115    1.180427    0.581671    11.00000    0.02853    0.03276 =
         0.03667    0.01327    0.01027    0.01124
AFIX  43
H35   2    0.290803    1.226456    0.536481    11.00000   -1.20000
AFIX   0
 
C41   1    0.686053    0.534843    0.759821    11.00000    0.02018    0.02857 =
         0.03925    0.00888    0.00474    0.01532
AFIX  13
H41   2    0.745830    0.526838    0.720428    11.00000   -1.20000
AFIX   0
C36   1    0.356141    1.219723    0.659908    11.00000    0.03812    0.02164 =
         0.04611    0.00652    0.00862    0.00366
AFIX  43
H36   2    0.395745    1.292592    0.668752    11.00000   -1.20000
AFIX   0
 
C37   1    0.361577    1.152663    0.727427    11.00000    0.03243    0.02766 =
         0.03130   -0.00269    0.00033    0.00742
AFIX  43
H37   2    0.406610    1.180268    0.781350    11.00000   -1.20000
AFIX   0
 
C38   1    0.302520    1.047749    0.716271    11.00000    0.02680    0.02493 =
         0.02329    0.00368    0.00284    0.00971
AFIX  43
H38   2    0.305478    1.003896    0.762959    11.00000   -1.20000
AFIX   0
 
C182  1    0.399662    0.599904    0.487625    11.00000    0.04553    0.05229 =
         0.02516   -0.00632    0.00829    0.02369
AFIX 137
H18A  2    0.310994    0.566708    0.480482    11.00000   -1.50000
H18B  2    0.444859    0.559395    0.525835    11.00000   -1.50000
H18C  2    0.428571    0.601283    0.432198    11.00000   -1.50000
AFIX   0
C39   1    0.234432    1.071743    0.566785    11.00000    0.01776    0.03021 =
         0.02722    0.00700    0.00635    0.01197
 
C181  1    0.339711    0.772350    0.472792    11.00000    0.04112    0.06589 =
         0.02206    0.01218    0.00882    0.03491
AFIX 137
H18D  2    0.358762    0.774761    0.414479    11.00000   -1.50000
H18E  2    0.354378    0.844419    0.497718    11.00000   -1.50000
H18F  2    0.252831    0.736201    0.472197    11.00000   -1.50000
AFIX   0
C40   1    0.237151    1.003928    0.635998    11.00000    0.02035    0.02483 =
         0.02059    0.00175    0.00483    0.01047
 
C271  1    0.386956    0.814857    1.036991    11.00000    0.04123    0.05182 =
         0.03135    0.00211   -0.00683    0.01243
AFIX 137
H27A  2    0.454114    0.811231    1.004563    11.00000   -1.50000
H27B  2    0.353831    0.745098    1.057146    11.00000   -1.50000
H27C  2    0.418754    0.865758    1.085809    11.00000   -1.50000
AFIX   0
 
C272  1    0.331187    0.962445    0.953773    11.00000    0.03295    0.03754 =
         0.03077   -0.00657    0.00198    0.00799
AFIX 137
H27D  2    0.398777    0.964222    0.920522    11.00000   -1.50000
H27E  2    0.361427    1.009893    1.004828    11.00000   -1.50000
H27F  2    0.263773    0.985319    0.919318    11.00000   -1.50000
AFIX   0
 
C12   1    0.253575    0.670104    0.651240    11.00000    0.01431    0.02163 =
         0.01839    0.00099    0.00089    0.00585
C11   1    0.156520    0.716983    0.669207    11.00000    0.01874    0.01908 =
         0.01560   -0.00184    0.00108    0.00730
REM #####
 
REM #####
REM #####
REM #####
REM #####
REM #####
C90   1    0.184617    0.241178    0.873480    11.00000    0.07560    0.16873 =
         0.05163   -0.01120    0.01542    0.05694
 
Part 2
AFIX  33
H90A  2    0.186010    0.199184    0.821847    21.00000   -1.50000
H90B  2    0.168453    0.194315    0.919924    21.00000   -1.50000
H90C  2    0.264736    0.291453    0.889116    21.00000   -1.50000
AFIX  33
Part 1
H90D  2    0.195954    0.200093    0.824041   -21.00000   -1.50000
H90E  2    0.215699    0.211468    0.925715   -21.00000   -1.50000
H90F  2    0.230335    0.314650    0.872010   -21.00000   -1.50000
AFIX   0
Part 0
 
Part 2
 
C91A  1    0.081144    0.302271    0.856938    21.00000    0.10248    0.08201 =
         0.11784    0.02828   -0.00106   -0.01370
AFIX  23
H91A  2    0.064806    0.331473    0.911069    21.00000   -1.20000
H91B  2    0.104856    0.360964    0.819680    21.00000   -1.20000
AFIX   0
 
C92A  1   -0.026836    0.224975    0.815677    21.00000    0.08891    0.03006 =
         0.04676    0.00491   -0.00577    0.01170
AFIX  23
H92A  2   -0.051897    0.169335    0.855283    21.00000   -1.20000
H92B  2   -0.005712    0.191250    0.765122    21.00000   -1.20000
AFIX   0
Part 1
 
C91B  1   -0.005452    0.279791    0.789271   -21.00000    0.05579    0.04178 =
         0.04167    0.00275    0.01101    0.00947
AFIX  23
H91C  2    0.041832    0.353006    0.784645   -21.00000   -1.20000
H91D  2    0.004638    0.236378    0.740006   -21.00000   -1.20000
AFIX   0
 
C92B  1    0.046439    0.236981    0.871400   -21.00000    0.05060    0.03731 =
         0.04226    0.00076    0.02336    0.00447
AFIX  23
H92C  2    0.000701    0.163146    0.875492   -21.00000   -1.20000
H92D  2    0.035030    0.279411    0.920825   -21.00000   -1.20000
AFIX   0
 
Part 0
 
C93   1   -0.140855    0.278546    0.786860    11.00000    0.06770    0.13487 =
         0.10712   -0.05053    0.00671    0.02970
Part 2
AFIX  23
H93A  2   -0.157183    0.321803    0.834032    21.00000   -1.20000
H93B  2   -0.127300    0.322112    0.737402    21.00000   -1.20000
AFIX  23
Part 1
H93C  2   -0.150067    0.305033    0.843887   -21.00000   -1.20000
H93D  2   -0.158863    0.331735    0.746740   -21.00000   -1.20000
AFIX   0
Part 0
 
C94   1   -0.237578    0.185060    0.764989    11.00000    0.09194    0.07020 =
         0.05849    0.00218    0.00400    0.03510
AFIX 137
H94A  2   -0.224342    0.149760    0.713172    11.00000   -1.50000
H94B  2   -0.317584    0.204146    0.755236    11.00000   -1.50000
H94C  2   -0.236958    0.137335    0.811602    11.00000   -1.50000
 
HKLF 4
 
REM  SV2 in P-1
REM R1 =  0.0287 for  10157 Fo > 4sig(Fo)  and  0.0342 for all  11133 data
REM    517 parameters refined using      0 restraints
 
END  
     
WGHT      0.0226      3.0336 
REM Highest difference peak  3.033,  deepest hole -1.120,  1-sigma level  0.099
Q1    1   0.5215  0.6425  0.7504  11.00000  0.05    3.03
Q2    1   0.3144  1.0979  0.8601  11.00000  0.05    0.91
Q3    1   0.6617  0.6419  0.7098  11.00000  0.05    0.78
Q4    1   0.4310  0.5803  0.8165  11.00000  0.05    0.75
Q5    1   0.6232  0.6595  0.7702  11.00000  0.05    0.71
Q6    1  -0.2135  0.2383  0.7269  11.00000  0.05    0.64
Q7    1   0.6999  0.6847  0.6690  11.00000  0.05    0.64
Q8    1   0.5553  0.6443  0.6991  11.00000  0.05    0.62
Q9    1   0.5250  0.5639  0.7483  11.00000  0.05    0.61
Q10   1   0.5873  0.6035  0.7223  11.00000  0.05    0.58
Q11   1   0.5970  0.6734  0.6502  11.00000  0.05    0.58
Q12   1   0.5533  0.6112  0.6383  11.00000  0.05    0.57
Q13   1   0.4928  0.6049  0.6646  11.00000  0.05    0.57
Q14   1  -0.1281  0.2193  0.8174  11.00000  0.05    0.57
Q15   1   0.5579  0.7225  0.7405  11.00000  0.05    0.55
Q16   1   0.1664  0.6989  0.9122  11.00000  0.05    0.55
Q17   1   0.4559  0.8076  0.6569  11.00000  0.05    0.52
Q18   1   0.5989  0.7173  0.6839  11.00000  0.05    0.50
Q19   1   0.5971  0.5610  0.6950  11.00000  0.05    0.48
Q20   1   0.3337  1.0805  0.8076  11.00000  0.05    0.46

;


 
data_sv7 
 
_audit_creation_method            SHELXL-97 
_chemical_name_systematic 
; 
 ? 
; 
_chemical_name_common             ? 
_chemical_melting_point           ? 
_chemical_formula_moiety          ? 
_chemical_formula_sum 
 'C86 H109 Cl2 Ir2 N2 P4' 
_chemical_formula_weight          1749.93 
 
loop_ 
 _atom_type_symbol 
 _atom_type_description 
 _atom_type_scat_dispersion_real 
 _atom_type_scat_dispersion_imag 
 _atom_type_scat_source 
 'C'  'C'   0.0033   0.0016 
 'International Tables Vol C Tables 4.2.6.8 and 6.1.1.4' 
 'H'  'H'   0.0000   0.0000 
 'International Tables Vol C Tables 4.2.6.8 and 6.1.1.4' 
 'N'  'N'   0.0061   0.0033 
 'International Tables Vol C Tables 4.2.6.8 and 6.1.1.4' 
 'P'  'P'   0.1023   0.0942 
 'International Tables Vol C Tables 4.2.6.8 and 6.1.1.4' 
 'Cl'  'Cl'   0.1484   0.1585 
 'International Tables Vol C Tables 4.2.6.8 and 6.1.1.4' 
 'Ir'  'Ir'  -1.4442   7.9887 
 'International Tables Vol C Tables 4.2.6.8 and 6.1.1.4' 
 
_symmetry_cell_setting            'monoclinic' 
_symmetry_space_group_name_H-M    'P2(1)/n' 
 
loop_ 
 _symmetry_equiv_pos_as_xyz 
 'x, y, z' 
 '-x+1/2, y+1/2, -z+1/2' 
 '-x, -y, -z' 
 'x-1/2, -y-1/2, z-1/2' 
 
_cell_length_a                    21.090(2) 
_cell_length_b                    11.2859(11) 
_cell_length_c                    32.361(3) 
_cell_angle_alpha                 90.00 
_cell_angle_beta                  99.716(2) 
_cell_angle_gamma                 90.00 
_cell_volume                      7591.9(13) 
_cell_formula_units_Z             4 
_cell_measurement_temperature     120(2) 
_cell_measurement_reflns_used     9926 
_cell_measurement_theta_min       2.21 
_cell_measurement_theta_max       28.57 
 
_exptl_crystal_description        'block' 
_exptl_crystal_colour             ? 
_exptl_crystal_size_max           0.03 
_exptl_crystal_size_mid           0.03 
_exptl_crystal_size_min           0.03 
_exptl_crystal_density_meas       ? 
_exptl_crystal_density_diffrn     1.531 
_exptl_crystal_density_method     'not measured' 
_exptl_crystal_F_000              3548 
_exptl_absorpt_coefficient_mu     3.704 
_exptl_absorpt_correction_type    'multi-scan' 
_exptl_absorpt_correction_T_min   0.9034 
_exptl_absorpt_correction_T_max   0.9131 
_exptl_absorpt_process_details    'Bruker AXS area detector scaling and absorption correction' 
 
_exptl_special_details 
; 
 ? 
; 
 
_diffrn_ambient_temperature       120(2) 
_diffrn_radiation_wavelength      0.71073 
_diffrn_radiation_type            MoK\a 
_diffrn_radiation_source          'fine-focus sealed tube' 
_diffrn_radiation_monochromator   graphite 
_diffrn_measurement_device_type   'Bruker APEX-II' 
_diffrn_measurement_method        ? 
_diffrn_detector_area_resol_mean  ? 
_diffrn_standards_number          ? 
_diffrn_standards_interval_count  ? 
_diffrn_standards_interval_time   ? 
_diffrn_standards_decay_%         ? 
_diffrn_reflns_number             96234 
_diffrn_reflns_av_R_equivalents   0.0552 
_diffrn_reflns_av_sigmaI/netI     0.0365 
_diffrn_reflns_limit_h_min        -25 
_diffrn_reflns_limit_h_max        25 
_diffrn_reflns_limit_k_min        -13 
_diffrn_reflns_limit_k_max        13 
_diffrn_reflns_limit_l_min        -38 
_diffrn_reflns_limit_l_max        38 
_diffrn_reflns_theta_min          1.08 
_diffrn_reflns_theta_max          25.00 
_reflns_number_total              13383 
_reflns_number_gt                 10991 
_reflns_threshold_expression      >2sigma(I) 
 
_computing_data_collection        ? 
_computing_cell_refinement        ? 
_computing_data_reduction         ? 
_computing_structure_solution     'SHELXS-97 (Sheldrick, 1990)' 
_computing_structure_refinement   'SHELXL-97 (Sheldrick, 1997)' 
_computing_molecular_graphics     ? 
_computing_publication_material   ? 
 
_refine_special_details 
; 
 Refinement of F^2^ against ALL reflections.  The weighted R-factor wR and 
 goodness of fit S are based on F^2^, conventional R-factors R are based 
 on F, with F set to zero for negative F^2^. The threshold expression of 
 F^2^ > 2sigma(F^2^) is used only for calculating R-factors(gt) etc. and is 
 not relevant to the choice of reflections for refinement.  R-factors based 
 on F^2^ are statistically about twice as large as those based on F, and R- 
 factors based on ALL data will be even larger. 
; 
 
_refine_ls_structure_factor_coef  Fsqd  
_refine_ls_matrix_type            full 
_refine_ls_weighting_scheme       calc  
_refine_ls_weighting_details 
 'calc w=1/[\s^2^(Fo^2^)+(0.0278P)^2^+12.2211P] where P=(Fo^2^+2Fc^2^)/3' 
_atom_sites_solution_primary      direct 
_atom_sites_solution_secondary    difmap 
_atom_sites_solution_hydrogens    geom 
_refine_ls_hydrogen_treatment     mixed 
_refine_ls_extinction_method      none 
_refine_ls_extinction_coef        ? 
_refine_ls_number_reflns          13383 
_refine_ls_number_parameters      885 
_refine_ls_number_restraints      0 
_refine_ls_R_factor_all           0.0434 
_refine_ls_R_factor_gt            0.0295 
_refine_ls_wR_factor_ref          0.0688 
_refine_ls_wR_factor_gt           0.0636 
_refine_ls_goodness_of_fit_ref    1.037 
_refine_ls_restrained_S_all       1.037 
_refine_ls_shift/su_max           0.002 
_refine_ls_shift/su_mean          0.000 
 
loop_ 
 _atom_site_label 
 _atom_site_type_symbol 
 _atom_site_fract_x 
 _atom_site_fract_y 
 _atom_site_fract_z 
 _atom_site_U_iso_or_equiv 
 _atom_site_adp_type 
 _atom_site_occupancy 
 _atom_site_symmetry_multiplicity 
 _atom_site_calc_flag 
 _atom_site_refinement_flags 
 _atom_site_disorder_assembly 
 _atom_site_disorder_group 
Ir1 Ir 0.637116(7) 0.641123(13) 0.370200(5) 0.01121(5) Uani 1 1 d . . . 
H1 H 0.570(2) 0.572(4) 0.3632(15) 0.044(15) Uiso 1 1 d . . . 
N1 N 0.72692(15) 0.7521(3) 0.38102(11) 0.0130(8) Uani 1 1 d . . . 
Cl1 Cl 0.69999(5) 0.45515(9) 0.38478(3) 0.0177(2) Uani 1 1 d . . . 
Ir2 Ir 0.145506(7) 0.616656(14) 0.373593(5) 0.01179(5) Uani 1 1 d . . . 
N2 N 0.23623(15) 0.7247(3) 0.38442(11) 0.0114(7) Uani 1 1 d . . . 
Cl2 Cl 0.20798(5) 0.42887(9) 0.38610(3) 0.0181(2) Uani 1 1 d . . . 
P11 P 0.66388(5) 0.62422(9) 0.30362(3) 0.0121(2) Uani 1 1 d . . . 
C11 C 0.70673(19) 0.8701(3) 0.36132(12) 0.0124(9) Uani 1 1 d . . . 
C10 C 0.6396(2) 0.8937(4) 0.35331(13) 0.0149(9) Uani 1 1 d . . . 
P12 P 0.63667(5) 0.65871(9) 0.44052(3) 0.0125(2) Uani 1 1 d . . . 
C12 C 0.7500(2) 0.9512(4) 0.35174(13) 0.0173(10) Uani 1 1 d . . . 
H12 H 0.7943 0.9311 0.3545 0.021 Uiso 1 1 calc R . . 
C15 C 0.6192(2) 1.0086(4) 0.33928(13) 0.0183(10) Uani 1 1 d . . . 
C16 C 0.5525(2) 1.0316(4) 0.33031(14) 0.0214(10) Uani 1 1 d . . . 
H16 H 0.5374 1.1090 0.3223 0.026 Uiso 1 1 calc R . . 
C17 C 0.5098(2) 0.9422(4) 0.33316(14) 0.0241(11) Uani 1 1 d . . . 
H17 H 0.4650 0.9585 0.3270 0.029 Uiso 1 1 calc R . . 
C18 C 0.5303(2) 0.8266(4) 0.34501(13) 0.0174(10) Uani 1 1 d . . . 
H18 H 0.4993 0.7659 0.3456 0.021 Uiso 1 1 calc R . . 
C58 C 0.1036(2) 0.8548(4) 0.46227(15) 0.0253(11) Uani 1 1 d . . . 
H58A H 0.0899 0.8729 0.4325 0.038 Uiso 1 1 calc R . . 
H58B H 0.1492 0.8744 0.4705 0.038 Uiso 1 1 calc R . . 
H58C H 0.0780 0.9017 0.4790 0.038 Uiso 1 1 calc R . . 
C57 C 0.0228(2) 0.6894(4) 0.45708(16) 0.0293(12) Uani 1 1 d . . . 
H57A H 0.0102 0.6981 0.4267 0.044 Uiso 1 1 calc R . . 
H57B H -0.0038 0.7413 0.4714 0.044 Uiso 1 1 calc R . . 
H57C H 0.0168 0.6069 0.4650 0.044 Uiso 1 1 calc R . . 
C56 C 0.0935(2) 0.7236(4) 0.46976(14) 0.0196(10) Uani 1 1 d . . . 
H56 H 0.1050 0.7100 0.5007 0.024 Uiso 1 1 calc R . . 
C55 C 0.6734(2) 0.7594(4) 0.22919(14) 0.0227(11) Uani 1 1 d . . . 
H55A H 0.7183 0.7736 0.2420 0.034 Uiso 1 1 calc R . . 
H55B H 0.6567 0.8291 0.2128 0.034 Uiso 1 1 calc R . . 
H55C H 0.6711 0.6902 0.2107 0.034 Uiso 1 1 calc R . . 
C54 C 0.6644(2) 0.4586(4) 0.23380(14) 0.0222(10) Uani 1 1 d . . . 
H54A H 0.7075 0.4848 0.2305 0.033 Uiso 1 1 calc R . . 
H54B H 0.6321 0.5066 0.2159 0.033 Uiso 1 1 calc R . . 
H54C H 0.6588 0.3750 0.2257 0.033 Uiso 1 1 calc R . . 
C53 C 0.5916(2) 0.4170(4) 0.28542(15) 0.0220(10) Uani 1 1 d . . . 
H53A H 0.5880 0.4176 0.3152 0.033 Uiso 1 1 calc R . . 
H53B H 0.5897 0.3352 0.2752 0.033 Uiso 1 1 calc R . . 
H53C H 0.5561 0.4626 0.2695 0.033 Uiso 1 1 calc R . . 
C52 C 0.5626(2) 0.7148(4) 0.24530(14) 0.0228(10) Uani 1 1 d . . . 
H52A H 0.5378 0.7067 0.2682 0.034 Uiso 1 1 calc R . . 
H52B H 0.5588 0.6419 0.2286 0.034 Uiso 1 1 calc R . . 
H52C H 0.5459 0.7817 0.2274 0.034 Uiso 1 1 calc R . . 
C51 C 0.63318(19) 0.7368(4) 0.26349(13) 0.0147(9) Uani 1 1 d . . . 
H51 H 0.6337 0.8133 0.2792 0.018 Uiso 1 1 calc R . . 
C50 C 0.6561(2) 0.4732(4) 0.27966(14) 0.0162(9) Uani 1 1 d . . . 
H50 H 0.6904 0.4237 0.2965 0.019 Uiso 1 1 calc R . . 
C61 C 0.0939(2) 0.4038(4) 0.45147(15) 0.0251(11) Uani 1 1 d . . . 
H61A H 0.0947 0.3988 0.4213 0.038 Uiso 1 1 calc R . . 
H61B H 0.0528 0.4374 0.4559 0.038 Uiso 1 1 calc R . . 
H61C H 0.0990 0.3243 0.4638 0.038 Uiso 1 1 calc R . . 
C60 C 0.1488(2) 0.4830(4) 0.47228(14) 0.0186(10) Uani 1 1 d . . . 
H60 H 0.1895 0.4428 0.4680 0.022 Uiso 1 1 calc R . . 
C59 C 0.1502(2) 0.4865(4) 0.51975(14) 0.0259(11) Uani 1 1 d . . . 
H59A H 0.1507 0.4054 0.5306 0.039 Uiso 1 1 calc R . . 
H59B H 0.1119 0.5279 0.5257 0.039 Uiso 1 1 calc R . . 
H59C H 0.1889 0.5285 0.5333 0.039 Uiso 1 1 calc R . . 
C49 C 0.5899(2) 0.8884(4) 0.45480(14) 0.0201(10) Uani 1 1 d . . . 
H49A H 0.5654 0.9363 0.4719 0.030 Uiso 1 1 calc R . . 
H49B H 0.5739 0.9031 0.4250 0.030 Uiso 1 1 calc R . . 
H49C H 0.6356 0.9100 0.4613 0.030 Uiso 1 1 calc R . . 
C48 C 0.6394(2) 0.5258(4) 0.51795(14) 0.0258(11) Uani 1 1 d . . . 
H48A H 0.6408 0.4458 0.5298 0.039 Uiso 1 1 calc R . . 
H48B H 0.6004 0.5663 0.5230 0.039 Uiso 1 1 calc R . . 
H48C H 0.6773 0.5704 0.5312 0.039 Uiso 1 1 calc R . . 
C19 C 0.5950(2) 0.8000(4) 0.35581(13) 0.0136(9) Uani 1 1 d . . . 
P21 P 0.14711(5) 0.62749(10) 0.44429(3) 0.0139(2) Uani 1 1 d . . . 
C20 C 0.1497(2) 0.8692(4) 0.35835(13) 0.0150(9) Uani 1 1 d . . . 
C21 C 0.21651(19) 0.8433(4) 0.36556(13) 0.0140(6) Uani 1 1 d . . . 
P22 P 0.17024(5) 0.60221(9) 0.30678(3) 0.0119(2) Uani 1 1 d . . . 
C22 C 0.2604(2) 0.9234(4) 0.35567(13) 0.0160(9) Uani 1 1 d . . . 
H22 H 0.3044 0.9019 0.3581 0.019 Uiso 1 1 calc R . . 
C23 C 0.2401(2) 1.0378(4) 0.34190(13) 0.0207(10) Uani 1 1 d . . . 
H23 H 0.2708 1.0935 0.3355 0.025 Uiso 1 1 calc R . . 
C24 C 0.1771(2) 1.0696(4) 0.33756(14) 0.0220(10) Uani 1 1 d . . . 
H24 H 0.1646 1.1485 0.3299 0.026 Uiso 1 1 calc R . . 
C25 C 0.1299(2) 0.9854(4) 0.34437(13) 0.0168(9) Uani 1 1 d . . . 
C26 C 0.0634(2) 1.0106(4) 0.33651(14) 0.0217(10) Uani 1 1 d . . . 
H26 H 0.0489 1.0889 0.3294 0.026 Uiso 1 1 calc R . . 
C27 C 0.0203(2) 0.9225(4) 0.33911(14) 0.0257(11) Uani 1 1 d . . . 
H27 H -0.0244 0.9397 0.3330 0.031 Uiso 1 1 calc R . . 
C28 C 0.0404(2) 0.8064(4) 0.35066(14) 0.0214(10) Uani 1 1 d . . . 
H28 H 0.0086 0.7472 0.3516 0.026 Uiso 1 1 calc R . . 
C29 C 0.10473(19) 0.7753(4) 0.36074(13) 0.0141(9) Uani 1 1 d . . . 
C67 C 0.1750(2) 0.7395(4) 0.23165(14) 0.0244(11) Uani 1 1 d . . . 
H67A H 0.1577 0.8104 0.2163 0.037 Uiso 1 1 calc R . . 
H67B H 0.1701 0.6712 0.2127 0.037 Uiso 1 1 calc R . . 
H67C H 0.2207 0.7514 0.2428 0.037 Uiso 1 1 calc R . . 
C68 C 0.25752(19) 0.6264(3) 0.31995(13) 0.0147(9) Uani 1 1 d . . . 
C69 C 0.28237(19) 0.6673(4) 0.36046(13) 0.0129(9) Uani 1 1 d . . . 
C70 C 0.34724(19) 0.6564(4) 0.37540(13) 0.0147(9) Uani 1 1 d . . . 
H70 H 0.3638 0.6780 0.4035 0.018 Uiso 1 1 calc R . . 
C71 C 0.38882(19) 0.6141(4) 0.34967(14) 0.0170(10) Uani 1 1 d . . . 
H71 H 0.4331 0.6042 0.3608 0.020 Uiso 1 1 calc R . . 
C72 C 0.3668(2) 0.5863(4) 0.30818(13) 0.0150(9) Uani 1 1 d . . . 
C73 C 0.30084(19) 0.5895(3) 0.29453(13) 0.0141(9) Uani 1 1 d . . . 
H73 H 0.2845 0.5655 0.2666 0.017 Uiso 1 1 calc R . . 
C74 C 0.4122(2) 0.5503(4) 0.27920(15) 0.0225(10) Uani 1 1 d . . . 
H74A H 0.4249 0.6204 0.2647 0.034 Uiso 1 1 calc R . . 
H74B H 0.3907 0.4935 0.2585 0.034 Uiso 1 1 calc R . . 
H74C H 0.4505 0.5133 0.2955 0.034 Uiso 1 1 calc R . . 
C75 C 0.22522(19) 0.7008(3) 0.46044(13) 0.0127(9) Uani 1 1 d . . . 
C76 C 0.25952(19) 0.7446(3) 0.43050(13) 0.0125(9) Uani 1 1 d . . . 
C77 C 0.31273(19) 0.8159(4) 0.44345(13) 0.0152(9) Uani 1 1 d . . . 
H77 H 0.3355 0.8480 0.4231 0.018 Uiso 1 1 calc R . . 
C78 C 0.3332(2) 0.8411(4) 0.48522(13) 0.0158(9) Uani 1 1 d . . . 
H78 H 0.3706 0.8883 0.4932 0.019 Uiso 1 1 calc R . . 
C79 C 0.3003(2) 0.7989(4) 0.51593(13) 0.0154(9) Uani 1 1 d . . . 
C80 C 0.2469(2) 0.7287(4) 0.50266(13) 0.0160(9) Uani 1 1 d . . . 
H80 H 0.2238 0.6981 0.5231 0.019 Uiso 1 1 calc R . . 
C81 C 0.3206(2) 0.8313(4) 0.56148(13) 0.0205(10) Uani 1 1 d . . . 
H81A H 0.2907 0.8902 0.5695 0.031 Uiso 1 1 calc R . . 
H81B H 0.3642 0.8644 0.5657 0.031 Uiso 1 1 calc R . . 
H81C H 0.3200 0.7603 0.5789 0.031 Uiso 1 1 calc R . . 
C82 C 0.0664(3) 0.8540(5) 0.58466(16) 0.0355(13) Uani 1 1 d . . . 
C83 C 0.1635(2) 0.7392(4) 0.60008(15) 0.0253(11) Uani 1 1 d . . . 
H83 H 0.2081 0.7297 0.5994 0.030 Uiso 1 1 calc R . . 
C84 C 0.1321(2) 0.8392(4) 0.58309(16) 0.0285(12) Uani 1 1 d . . . 
H84 H 0.1547 0.8980 0.5704 0.034 Uiso 1 1 calc R . . 
C85 C 0.1312(3) 0.6529(5) 0.61800(16) 0.0360(13) Uani 1 1 d . . . 
H85 H 0.1534 0.5836 0.6292 0.043 Uiso 1 1 calc R . . 
C86 C 0.0668(3) 0.6659(5) 0.61989(19) 0.0461(15) Uani 1 1 d . . . 
H86 H 0.0445 0.6061 0.6323 0.055 Uiso 1 1 calc R . . 
C87 C 0.0355(3) 0.7653(5) 0.60381(17) 0.0392(14) Uani 1 1 d . . . 
H87 H -0.0087 0.7746 0.6057 0.047 Uiso 1 1 calc R . . 
C88 C 0.0325(3) 0.9601(6) 0.5659(2) 0.063(2) Uani 1 1 d . . . 
H88A H 0.0115 0.9422 0.5372 0.095 Uiso 1 1 calc R . . 
H88B H 0.0635 1.0247 0.5654 0.095 Uiso 1 1 calc R . . 
H88C H 0.0001 0.9842 0.5826 0.095 Uiso 1 1 calc R . . 
C89 C 0.4287(2) 0.0866(4) 0.42954(16) 0.0324(12) Uani 1 1 d . . . 
H89 H 0.4438 0.0177 0.4449 0.039 Uiso 1 1 calc R . . 
C90 C 0.4688(2) 0.1500(4) 0.40907(16) 0.0306(12) Uani 1 1 d . . . 
H90 H 0.5119 0.1239 0.4102 0.037 Uiso 1 1 calc R . . 
C91 C 0.4484(2) 0.2511(4) 0.38678(15) 0.0274(12) Uani 1 1 d . . . 
C92 C 0.3845(2) 0.2887(4) 0.38507(14) 0.0262(11) Uani 1 1 d . . . 
H92 H 0.3692 0.3576 0.3697 0.031 Uiso 1 1 calc R . . 
C93 C 0.3442(2) 0.2247(4) 0.40588(15) 0.0254(11) Uani 1 1 d . . . 
H93 H 0.3011 0.2502 0.4053 0.031 Uiso 1 1 calc R . . 
C94 C 0.3661(2) 0.1235(4) 0.42769(16) 0.0273(11) Uani 1 1 d . . . 
H94 H 0.3377 0.0790 0.4415 0.033 Uiso 1 1 calc R . . 
C95 C 0.4907(3) 0.3172(5) 0.36200(17) 0.0413(14) Uani 1 1 d . . . 
H95A H 0.4771 0.3008 0.3321 0.062 Uiso 1 1 calc R . . 
H95B H 0.5354 0.2916 0.3706 0.062 Uiso 1 1 calc R . . 
H95C H 0.4875 0.4024 0.3671 0.062 Uiso 1 1 calc R . . 
C66 C 0.0668(2) 0.6964(4) 0.25265(14) 0.0234(11) Uani 1 1 d . . . 
H66A H 0.0611 0.6307 0.2326 0.035 Uiso 1 1 calc R . . 
H66B H 0.0476 0.7685 0.2390 0.035 Uiso 1 1 calc R . . 
H66C H 0.0458 0.6770 0.2766 0.035 Uiso 1 1 calc R . . 
C65 C 0.13835(19) 0.7166(4) 0.26791(13) 0.0167(9) Uani 1 1 d . . . 
H65 H 0.1410 0.7926 0.2840 0.020 Uiso 1 1 calc R . . 
C64 C 0.1681(2) 0.4388(4) 0.23626(14) 0.0246(11) Uani 1 1 d . . . 
H64A H 0.1344 0.4845 0.2186 0.037 Uiso 1 1 calc R . . 
H64B H 0.1643 0.3551 0.2282 0.037 Uiso 1 1 calc R . . 
H64C H 0.2104 0.4685 0.2325 0.037 Uiso 1 1 calc R . . 
C63 C 0.0962(2) 0.3974(4) 0.28882(15) 0.0254(11) Uani 1 1 d . . . 
H63A H 0.0941 0.3146 0.2796 0.038 Uiso 1 1 calc R . . 
H63B H 0.0607 0.4420 0.2724 0.038 Uiso 1 1 calc R . . 
H63C H 0.0927 0.4011 0.3186 0.038 Uiso 1 1 calc R . . 
C62 C 0.1606(2) 0.4517(4) 0.28230(14) 0.0178(10) Uani 1 1 d . . . 
H62 H 0.1949 0.4011 0.2987 0.021 Uiso 1 1 calc R . . 
C43 C 0.75107(18) 0.6496(3) 0.31821(13) 0.0122(9) Uani 1 1 d . . . 
C42 C 0.79588(19) 0.6096(3) 0.29371(13) 0.0141(9) Uani 1 1 d . . . 
H42 H 0.7806 0.5825 0.2660 0.017 Uiso 1 1 calc R . . 
C41 C 0.9086(2) 0.5682(4) 0.28098(14) 0.0223(10) Uani 1 1 d . . . 
H41A H 0.9454 0.5292 0.2982 0.033 Uiso 1 1 calc R . . 
H41B H 0.9238 0.6371 0.2670 0.033 Uiso 1 1 calc R . . 
H41C H 0.8874 0.5125 0.2599 0.033 Uiso 1 1 calc R . . 
C40 C 0.8615(2) 0.6083(3) 0.30852(14) 0.0159(9) Uani 1 1 d . . . 
C39 C 0.8817(2) 0.6411(4) 0.34971(14) 0.0178(10) Uani 1 1 d . . . 
H39 H 0.9260 0.6338 0.3615 0.021 Uiso 1 1 calc R . . 
C38 C 0.83880(19) 0.6848(3) 0.37435(13) 0.0140(6) Uani 1 1 d . . . 
H38 H 0.8541 0.7078 0.4025 0.017 Uiso 1 1 calc R . . 
C37 C 0.77413(19) 0.6949(3) 0.35812(13) 0.0130(9) Uani 1 1 d . . . 
C36 C 0.8118(2) 0.8612(4) 0.55795(13) 0.0223(10) Uani 1 1 d . . . 
H36A H 0.8067 0.7917 0.5753 0.034 Uiso 1 1 calc R . . 
H36B H 0.7856 0.9265 0.5657 0.034 Uiso 1 1 calc R . . 
H36C H 0.8571 0.8851 0.5625 0.034 Uiso 1 1 calc R . . 
C35 C 0.8022(2) 0.8474(4) 0.43975(14) 0.0172(9) Uani 1 1 d . . . 
H35 H 0.8247 0.8799 0.4193 0.021 Uiso 1 1 calc R . . 
C34 C 0.8230(2) 0.8730(4) 0.48144(14) 0.0184(10) Uani 1 1 d . . . 
H34 H 0.8603 0.9205 0.4893 0.022 Uiso 1 1 calc R . . 
C33 C 0.7903(2) 0.8306(4) 0.51224(14) 0.0172(10) Uani 1 1 d . . . 
C32 C 0.7365(2) 0.7620(4) 0.49902(13) 0.0172(10) Uani 1 1 d . . . 
H32 H 0.7132 0.7329 0.5196 0.021 Uiso 1 1 calc R . . 
C31 C 0.71426(19) 0.7329(3) 0.45679(13) 0.0131(9) Uani 1 1 d . . . 
C30 C 0.7491(2) 0.7752(3) 0.42677(13) 0.0143(9) Uani 1 1 d . . . 
C44 C 0.6391(2) 0.5179(4) 0.47070(13) 0.0160(9) Uani 1 1 d . . . 
H44 H 0.6803 0.4779 0.4674 0.019 Uiso 1 1 calc R . . 
C45 C 0.5821(2) 0.7573(4) 0.46443(14) 0.0173(10) Uani 1 1 d . . . 
H45 H 0.5938 0.7480 0.4955 0.021 Uiso 1 1 calc R . . 
C47 C 0.5116(2) 0.7200(4) 0.45252(16) 0.0266(11) Uani 1 1 d . . . 
H47A H 0.4848 0.7701 0.4674 0.040 Uiso 1 1 calc R . . 
H47B H 0.5070 0.6370 0.4603 0.040 Uiso 1 1 calc R . . 
H47C H 0.4979 0.7291 0.4222 0.040 Uiso 1 1 calc R . . 
C46 C 0.5850(2) 0.4354(4) 0.45044(15) 0.0237(11) Uani 1 1 d . . . 
H46A H 0.5908 0.3571 0.4636 0.036 Uiso 1 1 calc R . . 
H46B H 0.5862 0.4282 0.4204 0.036 Uiso 1 1 calc R . . 
H46C H 0.5434 0.4682 0.4544 0.036 Uiso 1 1 calc R . . 
C14 C 0.6658(2) 1.0941(4) 0.33258(14) 0.0232(11) Uani 1 1 d . . . 
H14 H 0.6526 1.1724 0.3244 0.028 Uiso 1 1 calc R . . 
C13 C 0.7289(2) 1.0648(4) 0.33778(13) 0.0204(10) Uani 1 1 d . . . 
H13 H 0.7593 1.1217 0.3319 0.025 Uiso 1 1 calc R . . 
 
loop_ 
 _atom_site_aniso_label 
 _atom_site_aniso_U_11 
 _atom_site_aniso_U_22 
 _atom_site_aniso_U_33 
 _atom_site_aniso_U_23 
 _atom_site_aniso_U_13 
 _atom_site_aniso_U_12 
Ir1 0.01225(9) 0.01207(9) 0.00984(9) -0.00001(7) 0.00340(7) -0.00246(6) 
N1 0.0135(18) 0.0144(18) 0.0114(19) -0.0002(14) 0.0034(15) 0.0005(14) 
Cl1 0.0207(5) 0.0170(5) 0.0163(6) 0.0042(4) 0.0055(5) 0.0017(4) 
Ir2 0.01218(9) 0.01401(9) 0.00965(9) -0.00067(7) 0.00320(7) -0.00355(6) 
N2 0.0118(17) 0.0114(17) 0.0120(19) -0.0025(14) 0.0045(15) -0.0009(14) 
Cl2 0.0239(6) 0.0148(5) 0.0166(6) 0.0030(4) 0.0064(5) 0.0009(4) 
P11 0.0130(5) 0.0136(5) 0.0101(6) -0.0005(4) 0.0029(4) -0.0016(4) 
C11 0.021(2) 0.012(2) 0.004(2) 0.0015(16) 0.0045(17) -0.0013(17) 
C10 0.020(2) 0.014(2) 0.010(2) 0.0004(17) 0.0036(18) -0.0012(18) 
P12 0.0148(5) 0.0126(5) 0.0108(6) 0.0001(4) 0.0046(5) -0.0029(4) 
C12 0.020(2) 0.021(2) 0.012(2) -0.0022(18) 0.0065(19) -0.0049(19) 
C15 0.032(3) 0.016(2) 0.008(2) -0.0045(17) 0.003(2) 0.0024(19) 
C16 0.032(3) 0.017(2) 0.014(2) 0.0043(19) -0.002(2) 0.008(2) 
C17 0.022(2) 0.033(3) 0.016(3) 0.003(2) -0.002(2) 0.009(2) 
C18 0.015(2) 0.019(2) 0.017(2) -0.0027(19) 0.0010(19) 0.0014(18) 
C58 0.028(3) 0.027(3) 0.023(3) -0.010(2) 0.009(2) 0.000(2) 
C57 0.020(3) 0.036(3) 0.035(3) -0.001(2) 0.013(2) -0.002(2) 
C56 0.020(2) 0.024(2) 0.015(2) -0.0036(19) 0.004(2) -0.0052(19) 
C55 0.029(3) 0.023(2) 0.018(3) 0.005(2) 0.011(2) 0.003(2) 
C54 0.023(2) 0.023(3) 0.021(3) -0.007(2) 0.005(2) -0.005(2) 
C53 0.025(2) 0.016(2) 0.026(3) -0.005(2) 0.007(2) -0.0085(19) 
C52 0.021(2) 0.027(3) 0.019(3) 0.002(2) 0.001(2) 0.000(2) 
C51 0.017(2) 0.017(2) 0.009(2) -0.0017(17) 0.0002(18) -0.0010(18) 
C50 0.018(2) 0.012(2) 0.018(2) -0.0020(18) 0.0025(19) -0.0016(17) 
C61 0.029(3) 0.023(3) 0.024(3) 0.003(2) 0.005(2) -0.010(2) 
C60 0.023(2) 0.017(2) 0.018(3) 0.0035(19) 0.007(2) -0.0056(19) 
C59 0.036(3) 0.025(3) 0.017(3) 0.005(2) 0.006(2) -0.006(2) 
C49 0.022(2) 0.021(2) 0.018(2) -0.0039(19) 0.004(2) 0.0041(19) 
C48 0.040(3) 0.022(3) 0.016(3) 0.008(2) 0.006(2) -0.007(2) 
C19 0.022(2) 0.013(2) 0.008(2) -0.0030(17) 0.0086(18) -0.0026(18) 
P21 0.0147(5) 0.0166(6) 0.0111(6) -0.0007(5) 0.0040(5) -0.0046(4) 
C20 0.022(2) 0.021(2) 0.003(2) -0.0021(17) 0.0034(18) -0.0013(18) 
C21 0.0192(16) 0.0147(15) 0.0088(15) 0.0007(12) 0.0048(13) -0.0035(12) 
P22 0.0124(5) 0.0141(5) 0.0096(6) -0.0016(4) 0.0032(4) -0.0020(4) 
C22 0.020(2) 0.018(2) 0.010(2) -0.0003(18) 0.0022(18) -0.0043(18) 
C23 0.032(3) 0.019(2) 0.013(2) -0.0011(19) 0.009(2) -0.007(2) 
C24 0.040(3) 0.013(2) 0.013(2) -0.0002(18) 0.006(2) 0.003(2) 
C25 0.029(3) 0.016(2) 0.005(2) -0.0004(17) 0.0025(19) 0.0014(19) 
C26 0.025(3) 0.022(2) 0.018(3) 0.001(2) 0.003(2) 0.009(2) 
C27 0.017(2) 0.037(3) 0.021(3) -0.001(2) -0.001(2) 0.007(2) 
C28 0.018(2) 0.025(3) 0.022(3) 0.000(2) 0.004(2) 0.0000(19) 
C29 0.015(2) 0.022(2) 0.006(2) -0.0041(17) 0.0046(18) -0.0054(18) 
C67 0.032(3) 0.025(3) 0.017(3) 0.006(2) 0.006(2) 0.006(2) 
C68 0.018(2) 0.012(2) 0.015(2) 0.0014(18) 0.0049(18) -0.0029(17) 
C69 0.013(2) 0.015(2) 0.013(2) 0.0022(17) 0.0074(18) -0.0014(17) 
C70 0.015(2) 0.016(2) 0.012(2) 0.0012(17) 0.0022(18) -0.0013(17) 
C71 0.012(2) 0.017(2) 0.022(3) 0.0043(19) 0.0039(19) 0.0004(17) 
C72 0.018(2) 0.013(2) 0.015(2) 0.0013(18) 0.0065(19) 0.0016(17) 
C73 0.018(2) 0.012(2) 0.013(2) -0.0011(17) 0.0041(18) -0.0003(17) 
C74 0.021(2) 0.023(3) 0.025(3) -0.002(2) 0.009(2) -0.001(2) 
C75 0.013(2) 0.012(2) 0.012(2) 0.0000(17) 0.0004(18) -0.0030(17) 
C76 0.016(2) 0.011(2) 0.010(2) -0.0013(17) 0.0028(18) -0.0007(17) 
C77 0.014(2) 0.017(2) 0.015(2) 0.0018(18) 0.0033(18) -0.0036(17) 
C78 0.019(2) 0.013(2) 0.016(2) -0.0022(18) 0.0015(19) -0.0031(18) 
C79 0.022(2) 0.013(2) 0.011(2) 0.0004(17) 0.0027(19) -0.0013(18) 
C80 0.022(2) 0.019(2) 0.008(2) -0.0011(18) 0.0059(19) -0.0057(18) 
C81 0.029(3) 0.020(2) 0.013(2) -0.0036(19) 0.004(2) -0.008(2) 
C82 0.042(3) 0.037(3) 0.024(3) -0.004(2) -0.004(3) 0.018(3) 
C83 0.021(2) 0.029(3) 0.025(3) -0.007(2) 0.000(2) -0.002(2) 
C84 0.029(3) 0.026(3) 0.031(3) -0.003(2) 0.006(2) 0.000(2) 
C85 0.043(3) 0.040(3) 0.025(3) 0.000(2) 0.005(3) -0.004(3) 
C86 0.050(4) 0.042(4) 0.046(4) 0.006(3) 0.010(3) -0.010(3) 
C87 0.028(3) 0.053(4) 0.038(4) -0.011(3) 0.010(3) -0.008(3) 
C88 0.071(5) 0.071(5) 0.052(4) 0.017(4) 0.024(4) 0.032(4) 
C89 0.040(3) 0.028(3) 0.032(3) 0.002(2) 0.012(3) 0.006(2) 
C90 0.029(3) 0.036(3) 0.026(3) -0.001(2) 0.002(2) 0.005(2) 
C91 0.032(3) 0.031(3) 0.021(3) -0.010(2) 0.011(2) -0.014(2) 
C92 0.039(3) 0.023(3) 0.016(3) -0.004(2) 0.003(2) -0.001(2) 
C93 0.023(3) 0.026(3) 0.027(3) -0.007(2) 0.004(2) 0.003(2) 
C94 0.028(3) 0.022(3) 0.031(3) -0.009(2) 0.003(2) -0.002(2) 
C95 0.055(4) 0.037(3) 0.031(3) -0.002(3) 0.005(3) -0.012(3) 
C66 0.018(2) 0.031(3) 0.019(3) 0.001(2) -0.003(2) 0.000(2) 
C65 0.014(2) 0.023(2) 0.012(2) -0.0044(19) 0.0002(18) 0.0005(18) 
C64 0.028(3) 0.025(3) 0.021(3) -0.007(2) 0.004(2) -0.001(2) 
C63 0.029(3) 0.021(2) 0.028(3) -0.010(2) 0.008(2) -0.012(2) 
C62 0.016(2) 0.020(2) 0.017(2) -0.0049(19) 0.0016(19) -0.0023(18) 
C43 0.012(2) 0.010(2) 0.015(2) 0.0004(17) 0.0024(18) -0.0019(16) 
C42 0.018(2) 0.012(2) 0.013(2) -0.0006(17) 0.0037(18) -0.0003(17) 
C41 0.019(2) 0.027(3) 0.023(3) -0.001(2) 0.008(2) 0.001(2) 
C40 0.021(2) 0.010(2) 0.019(2) 0.0031(18) 0.0077(19) -0.0042(17) 
C39 0.012(2) 0.020(2) 0.020(3) 0.0036(19) 0.0012(19) -0.0044(18) 
C38 0.0192(16) 0.0147(15) 0.0088(15) 0.0007(12) 0.0048(13) -0.0035(12) 
C37 0.015(2) 0.012(2) 0.013(2) 0.0047(17) 0.0037(18) -0.0010(17) 
C36 0.028(3) 0.027(3) 0.010(2) -0.0017(19) 0.000(2) -0.007(2) 
C35 0.019(2) 0.017(2) 0.016(2) 0.0013(18) 0.0058(19) -0.0039(18) 
C34 0.020(2) 0.020(2) 0.015(2) -0.0030(19) 0.0015(19) -0.0082(19) 
C33 0.021(2) 0.015(2) 0.015(2) -0.0014(18) 0.0005(19) 0.0005(18) 
C32 0.026(2) 0.016(2) 0.011(2) -0.0018(18) 0.009(2) -0.0029(18) 
C31 0.014(2) 0.012(2) 0.014(2) 0.0008(17) 0.0041(18) 0.0000(17) 
C30 0.020(2) 0.012(2) 0.010(2) 0.0030(17) 0.0004(18) -0.0007(17) 
C44 0.019(2) 0.016(2) 0.014(2) 0.0033(18) 0.0035(19) -0.0029(18) 
C45 0.018(2) 0.023(2) 0.013(2) -0.0033(18) 0.0054(19) 0.0007(18) 
C47 0.018(2) 0.030(3) 0.034(3) -0.004(2) 0.011(2) 0.000(2) 
C46 0.029(3) 0.020(2) 0.023(3) 0.004(2) 0.008(2) -0.006(2) 
C14 0.040(3) 0.011(2) 0.018(3) 0.0019(19) 0.002(2) -0.002(2) 
C13 0.033(3) 0.019(2) 0.011(2) 0.0012(18) 0.008(2) -0.007(2) 
 
_geom_special_details 
; 
 All esds (except the esd in the dihedral angle between two l.s. planes) 
 are estimated using the full covariance matrix.  The cell esds are taken 
 into account individually in the estimation of esds in distances, angles 
 and torsion angles; correlations between esds in cell parameters are only 
 used when they are defined by crystal symmetry.  An approximate (isotropic) 
 treatment of cell esds is used for estimating esds involving l.s. planes. 
; 
 
loop_ 
 _geom_bond_atom_site_label_1 
 _geom_bond_atom_site_label_2 
 _geom_bond_distance 
 _geom_bond_site_symmetry_2 
 _geom_bond_publ_flag 
Ir1 C19 2.020(4) . ? 
Ir1 N1 2.248(3) . ? 
Ir1 P12 2.2860(11) . ? 
Ir1 P11 2.3255(11) . ? 
Ir1 Cl1 2.4850(10) . ? 
Ir1 H1 1.60(5) . ? 
N1 C37 1.485(5) . ? 
N1 C30 1.498(5) . ? 
N1 C11 1.508(5) . ? 
Ir2 C29 1.999(4) . ? 
Ir2 N2 2.246(3) . ? 
Ir2 P21 2.2856(11) . ? 
Ir2 P22 2.3139(11) . ? 
Ir2 Cl2 2.4923(10) . ? 
N2 C69 1.491(5) . ? 
N2 C21 1.500(5) . ? 
N2 C76 1.506(5) . ? 
P11 C43 1.842(4) . ? 
P11 C51 1.854(4) . ? 
P11 C50 1.869(4) . ? 
C11 C12 1.365(6) . ? 
C11 C10 1.421(6) . ? 
C10 C15 1.417(6) . ? 
C10 C19 1.427(6) . ? 
P12 C31 1.835(4) . ? 
P12 C45 1.861(4) . ? 
P12 C44 1.861(4) . ? 
C12 C13 1.406(6) . ? 
C12 H12 0.9500 . ? 
C15 C16 1.410(6) . ? 
C15 C14 1.421(6) . ? 
C16 C17 1.366(6) . ? 
C16 H16 0.9500 . ? 
C17 C18 1.407(6) . ? 
C17 H17 0.9500 . ? 
C18 C19 1.382(6) . ? 
C18 H18 0.9500 . ? 
C58 C56 1.522(6) . ? 
C58 H58A 0.9800 . ? 
C58 H58B 0.9800 . ? 
C58 H58C 0.9800 . ? 
C57 C56 1.526(6) . ? 
C57 H57A 0.9800 . ? 
C57 H57B 0.9800 . ? 
C57 H57C 0.9800 . ? 
C56 P21 1.857(4) . ? 
C56 H56 1.0000 . ? 
C55 C51 1.528(6) . ? 
C55 H55A 0.9800 . ? 
C55 H55B 0.9800 . ? 
C55 H55C 0.9800 . ? 
C54 C50 1.532(6) . ? 
C54 H54A 0.9800 . ? 
C54 H54B 0.9800 . ? 
C54 H54C 0.9800 . ? 
C53 C50 1.539(6) . ? 
C53 H53A 0.9800 . ? 
C53 H53B 0.9800 . ? 
C53 H53C 0.9800 . ? 
C52 C51 1.525(6) . ? 
C52 H52A 0.9800 . ? 
C52 H52B 0.9800 . ? 
C52 H52C 0.9800 . ? 
C51 H51 1.0000 . ? 
C50 H50 1.0000 . ? 
C61 C60 1.527(6) . ? 
C61 H61A 0.9800 . ? 
C61 H61B 0.9800 . ? 
C61 H61C 0.9800 . ? 
C60 C59 1.532(6) . ? 
C60 P21 1.863(4) . ? 
C60 H60 1.0000 . ? 
C59 H59A 0.9800 . ? 
C59 H59B 0.9800 . ? 
C59 H59C 0.9800 . ? 
C49 C45 1.527(6) . ? 
C49 H49A 0.9800 . ? 
C49 H49B 0.9800 . ? 
C49 H49C 0.9800 . ? 
C48 C44 1.531(6) . ? 
C48 H48A 0.9800 . ? 
C48 H48B 0.9800 . ? 
C48 H48C 0.9800 . ? 
P21 C75 1.839(4) . ? 
C20 C21 1.419(6) . ? 
C20 C25 1.427(6) . ? 
C20 C29 1.433(6) . ? 
C21 C22 1.370(6) . ? 
P22 C68 1.838(4) . ? 
P22 C65 1.848(4) . ? 
P22 C62 1.871(4) . ? 
C22 C23 1.409(6) . ? 
C22 H22 0.9500 . ? 
C23 C24 1.360(6) . ? 
C23 H23 0.9500 . ? 
C24 C25 1.419(6) . ? 
C24 H24 0.9500 . ? 
C25 C26 1.411(6) . ? 
C26 C27 1.359(6) . ? 
C26 H26 0.9500 . ? 
C27 C28 1.408(6) . ? 
C27 H27 0.9500 . ? 
C28 C29 1.386(6) . ? 
C28 H28 0.9500 . ? 
C67 C65 1.533(6) . ? 
C67 H67A 0.9800 . ? 
C67 H67B 0.9800 . ? 
C67 H67C 0.9800 . ? 
C68 C73 1.392(6) . ? 
C68 C69 1.405(6) . ? 
C69 C70 1.377(5) . ? 
C70 C71 1.392(6) . ? 
C70 H70 0.9500 . ? 
C71 C72 1.381(6) . ? 
C71 H71 0.9500 . ? 
C72 C73 1.387(6) . ? 
C72 C74 1.505(6) . ? 
C73 H73 0.9500 . ? 
C74 H74A 0.9800 . ? 
C74 H74B 0.9800 . ? 
C74 H74C 0.9800 . ? 
C75 C76 1.394(6) . ? 
C75 C80 1.401(6) . ? 
C76 C77 1.387(5) . ? 
C77 C78 1.378(6) . ? 
C77 H77 0.9500 . ? 
C78 C79 1.389(6) . ? 
C78 H78 0.9500 . ? 
C79 C80 1.385(6) . ? 
C79 C81 1.509(6) . ? 
C80 H80 0.9500 . ? 
C81 H81A 0.9800 . ? 
C81 H81B 0.9800 . ? 
C81 H81C 0.9800 . ? 
C82 C87 1.396(8) . ? 
C82 C84 1.404(7) . ? 
C82 C88 1.472(7) . ? 
C83 C85 1.372(7) . ? 
C83 C84 1.376(6) . ? 
C83 H83 0.9500 . ? 
C84 H84 0.9500 . ? 
C85 C86 1.378(7) . ? 
C85 H85 0.9500 . ? 
C86 C87 1.359(8) . ? 
C86 H86 0.9500 . ? 
C87 H87 0.9500 . ? 
C88 H88A 0.9800 . ? 
C88 H88B 0.9800 . ? 
C88 H88C 0.9800 . ? 
C89 C90 1.361(7) . ? 
C89 C94 1.377(7) . ? 
C89 H89 0.9500 . ? 
C90 C91 1.379(7) . ? 
C90 H90 0.9500 . ? 
C91 C92 1.406(6) . ? 
C91 C95 1.496(7) . ? 
C92 C93 1.374(6) . ? 
C92 H92 0.9500 . ? 
C93 C94 1.380(6) . ? 
C93 H93 0.9500 . ? 
C94 H94 0.9500 . ? 
C95 H95A 0.9800 . ? 
C95 H95B 0.9800 . ? 
C95 H95C 0.9800 . ? 
C66 C65 1.523(6) . ? 
C66 H66A 0.9800 . ? 
C66 H66B 0.9800 . ? 
C66 H66C 0.9800 . ? 
C65 H65 1.0000 . ? 
C64 C62 1.532(6) . ? 
C64 H64A 0.9800 . ? 
C64 H64B 0.9800 . ? 
C64 H64C 0.9800 . ? 
C63 C62 1.536(6) . ? 
C63 H63A 0.9800 . ? 
C63 H63B 0.9800 . ? 
C63 H63C 0.9800 . ? 
C62 H62 1.0000 . ? 
C43 C37 1.398(6) . ? 
C43 C42 1.407(6) . ? 
C42 C40 1.385(6) . ? 
C42 H42 0.9500 . ? 
C41 C40 1.513(6) . ? 
C41 H41A 0.9800 . ? 
C41 H41B 0.9800 . ? 
C41 H41C 0.9800 . ? 
C40 C39 1.380(6) . ? 
C39 C38 1.394(6) . ? 
C39 H39 0.9500 . ? 
C38 C37 1.381(5) . ? 
C38 H38 0.9500 . ? 
C36 C33 1.512(6) . ? 
C36 H36A 0.9800 . ? 
C36 H36B 0.9800 . ? 
C36 H36C 0.9800 . ? 
C35 C34 1.377(6) . ? 
C35 C30 1.391(6) . ? 
C35 H35 0.9500 . ? 
C34 C33 1.389(6) . ? 
C34 H34 0.9500 . ? 
C33 C32 1.380(6) . ? 
C32 C31 1.407(6) . ? 
C32 H32 0.9500 . ? 
C31 C30 1.397(6) . ? 
C44 C46 1.532(6) . ? 
C44 H44 1.0000 . ? 
C45 C47 1.530(6) . ? 
C45 H45 1.0000 . ? 
C47 H47A 0.9800 . ? 
C47 H47B 0.9800 . ? 
C47 H47C 0.9800 . ? 
C46 H46A 0.9800 . ? 
C46 H46B 0.9800 . ? 
C46 H46C 0.9800 . ? 
C14 C13 1.353(6) . ? 
C14 H14 0.9500 . ? 
C13 H13 0.9500 . ? 
 
loop_ 
 _geom_angle_atom_site_label_1 
 _geom_angle_atom_site_label_2 
 _geom_angle_atom_site_label_3 
 _geom_angle 
 _geom_angle_site_symmetry_1 
 _geom_angle_site_symmetry_3 
 _geom_angle_publ_flag 
C19 Ir1 N1 82.43(14) . . ? 
C19 Ir1 P12 94.40(12) . . ? 
N1 Ir1 P12 86.64(9) . . ? 
C19 Ir1 P11 91.46(11) . . ? 
N1 Ir1 P11 81.97(9) . . ? 
P12 Ir1 P11 166.39(4) . . ? 
C19 Ir1 Cl1 173.34(12) . . ? 
N1 Ir1 Cl1 91.85(9) . . ? 
P12 Ir1 Cl1 88.62(4) . . ? 
P11 Ir1 Cl1 84.35(4) . . ? 
C19 Ir1 H1 93.4(17) . . ? 
N1 Ir1 H1 175.4(17) . . ? 
P12 Ir1 H1 91.8(18) . . ? 
P11 Ir1 H1 100.1(18) . . ? 
Cl1 Ir1 H1 92.5(17) . . ? 
C37 N1 C30 116.4(3) . . ? 
C37 N1 C11 109.8(3) . . ? 
C30 N1 C11 106.4(3) . . ? 
C37 N1 Ir1 107.4(2) . . ? 
C30 N1 Ir1 111.4(2) . . ? 
C11 N1 Ir1 104.8(2) . . ? 
C29 Ir2 N2 82.61(14) . . ? 
C29 Ir2 P21 95.37(12) . . ? 
N2 Ir2 P21 86.93(9) . . ? 
C29 Ir2 P22 91.46(12) . . ? 
N2 Ir2 P22 82.17(9) . . ? 
P21 Ir2 P22 166.29(4) . . ? 
C29 Ir2 Cl2 172.90(12) . . ? 
N2 Ir2 Cl2 91.35(8) . . ? 
P21 Ir2 Cl2 87.98(4) . . ? 
P22 Ir2 Cl2 84.00(4) . . ? 
C69 N2 C21 109.7(3) . . ? 
C69 N2 C76 116.6(3) . . ? 
C21 N2 C76 107.0(3) . . ? 
C69 N2 Ir2 107.2(2) . . ? 
C21 N2 Ir2 104.5(2) . . ? 
C76 N2 Ir2 111.2(2) . . ? 
C43 P11 C51 106.76(18) . . ? 
C43 P11 C50 105.23(18) . . ? 
C51 P11 C50 109.8(2) . . ? 
C43 P11 Ir1 97.91(14) . . ? 
C51 P11 Ir1 118.83(14) . . ? 
C50 P11 Ir1 116.17(14) . . ? 
C12 C11 C10 121.2(4) . . ? 
C12 C11 N1 122.5(4) . . ? 
C10 C11 N1 116.4(3) . . ? 
C15 C10 C11 118.0(4) . . ? 
C15 C10 C19 121.9(4) . . ? 
C11 C10 C19 119.9(4) . . ? 
C31 P12 C45 101.07(19) . . ? 
C31 P12 C44 107.14(19) . . ? 
C45 P12 C44 104.9(2) . . ? 
C31 P12 Ir1 99.90(14) . . ? 
C45 P12 Ir1 124.93(15) . . ? 
C44 P12 Ir1 116.35(14) . . ? 
C11 C12 C13 119.7(4) . . ? 
C11 C12 H12 120.2 . . ? 
C13 C12 H12 120.2 . . ? 
C16 C15 C10 118.3(4) . . ? 
C16 C15 C14 122.3(4) . . ? 
C10 C15 C14 119.3(4) . . ? 
C17 C16 C15 119.7(4) . . ? 
C17 C16 H16 120.2 . . ? 
C15 C16 H16 120.2 . . ? 
C16 C17 C18 121.8(4) . . ? 
C16 C17 H17 119.1 . . ? 
C18 C17 H17 119.1 . . ? 
C19 C18 C17 121.0(4) . . ? 
C19 C18 H18 119.5 . . ? 
C17 C18 H18 119.5 . . ? 
C56 C58 H58A 109.5 . . ? 
C56 C58 H58B 109.5 . . ? 
H58A C58 H58B 109.5 . . ? 
C56 C58 H58C 109.5 . . ? 
H58A C58 H58C 109.5 . . ? 
H58B C58 H58C 109.5 . . ? 
C56 C57 H57A 109.5 . . ? 
C56 C57 H57B 109.5 . . ? 
H57A C57 H57B 109.5 . . ? 
C56 C57 H57C 109.5 . . ? 
H57A C57 H57C 109.5 . . ? 
H57B C57 H57C 109.5 . . ? 
C58 C56 C57 111.0(4) . . ? 
C58 C56 P21 112.7(3) . . ? 
C57 C56 P21 111.9(3) . . ? 
C58 C56 H56 106.9 . . ? 
C57 C56 H56 106.9 . . ? 
P21 C56 H56 106.9 . . ? 
C51 C55 H55A 109.5 . . ? 
C51 C55 H55B 109.5 . . ? 
H55A C55 H55B 109.5 . . ? 
C51 C55 H55C 109.5 . . ? 
H55A C55 H55C 109.5 . . ? 
H55B C55 H55C 109.5 . . ? 
C50 C54 H54A 109.5 . . ? 
C50 C54 H54B 109.5 . . ? 
H54A C54 H54B 109.5 . . ? 
C50 C54 H54C 109.5 . . ? 
H54A C54 H54C 109.5 . . ? 
H54B C54 H54C 109.5 . . ? 
C50 C53 H53A 109.5 . . ? 
C50 C53 H53B 109.5 . . ? 
H53A C53 H53B 109.5 . . ? 
C50 C53 H53C 109.5 . . ? 
H53A C53 H53C 109.5 . . ? 
H53B C53 H53C 109.5 . . ? 
C51 C52 H52A 109.5 . . ? 
C51 C52 H52B 109.5 . . ? 
H52A C52 H52B 109.5 . . ? 
C51 C52 H52C 109.5 . . ? 
H52A C52 H52C 109.5 . . ? 
H52B C52 H52C 109.5 . . ? 
C52 C51 C55 111.8(4) . . ? 
C52 C51 P11 111.2(3) . . ? 
C55 C51 P11 116.9(3) . . ? 
C52 C51 H51 105.3 . . ? 
C55 C51 H51 105.3 . . ? 
P11 C51 H51 105.3 . . ? 
C54 C50 C53 108.7(3) . . ? 
C54 C50 P11 118.9(3) . . ? 
C53 C50 P11 110.1(3) . . ? 
C54 C50 H50 106.1 . . ? 
C53 C50 H50 106.1 . . ? 
P11 C50 H50 106.1 . . ? 
C60 C61 H61A 109.5 . . ? 
C60 C61 H61B 109.5 . . ? 
H61A C61 H61B 109.5 . . ? 
C60 C61 H61C 109.5 . . ? 
H61A C61 H61C 109.5 . . ? 
H61B C61 H61C 109.5 . . ? 
C61 C60 C59 110.0(4) . . ? 
C61 C60 P21 110.3(3) . . ? 
C59 C60 P21 117.4(3) . . ? 
C61 C60 H60 106.1 . . ? 
C59 C60 H60 106.1 . . ? 
P21 C60 H60 106.1 . . ? 
C60 C59 H59A 109.5 . . ? 
C60 C59 H59B 109.5 . . ? 
H59A C59 H59B 109.5 . . ? 
C60 C59 H59C 109.5 . . ? 
H59A C59 H59C 109.5 . . ? 
H59B C59 H59C 109.5 . . ? 
C45 C49 H49A 109.5 . . ? 
C45 C49 H49B 109.5 . . ? 
H49A C49 H49B 109.5 . . ? 
C45 C49 H49C 109.5 . . ? 
H49A C49 H49C 109.5 . . ? 
H49B C49 H49C 109.5 . . ? 
C44 C48 H48A 109.5 . . ? 
C44 C48 H48B 109.5 . . ? 
H48A C48 H48B 109.5 . . ? 
C44 C48 H48C 109.5 . . ? 
H48A C48 H48C 109.5 . . ? 
H48B C48 H48C 109.5 . . ? 
C18 C19 C10 117.2(4) . . ? 
C18 C19 Ir1 128.9(3) . . ? 
C10 C19 Ir1 113.7(3) . . ? 
C75 P21 C56 101.21(19) . . ? 
C75 P21 C60 108.22(19) . . ? 
C56 P21 C60 105.0(2) . . ? 
C75 P21 Ir2 99.77(14) . . ? 
C56 P21 Ir2 124.63(15) . . ? 
C60 P21 Ir2 115.83(15) . . ? 
C21 C20 C25 118.1(4) . . ? 
C21 C20 C29 119.1(4) . . ? 
C25 C20 C29 122.4(4) . . ? 
C22 C21 C20 121.1(4) . . ? 
C22 C21 N2 122.1(4) . . ? 
C20 C21 N2 116.8(3) . . ? 
C68 P22 C65 106.82(19) . . ? 
C68 P22 C62 105.39(19) . . ? 
C65 P22 C62 110.2(2) . . ? 
C68 P22 Ir2 98.50(14) . . ? 
C65 P22 Ir2 118.25(14) . . ? 
C62 P22 Ir2 115.73(14) . . ? 
C21 C22 C23 119.8(4) . . ? 
C21 C22 H22 120.1 . . ? 
C23 C22 H22 120.1 . . ? 
C24 C23 C22 120.9(4) . . ? 
C24 C23 H23 119.5 . . ? 
C22 C23 H23 119.5 . . ? 
C23 C24 C25 120.3(4) . . ? 
C23 C24 H24 119.8 . . ? 
C25 C24 H24 119.8 . . ? 
C26 C25 C24 122.5(4) . . ? 
C26 C25 C20 118.1(4) . . ? 
C24 C25 C20 119.3(4) . . ? 
C27 C26 C25 119.7(4) . . ? 
C27 C26 H26 120.2 . . ? 
C25 C26 H26 120.2 . . ? 
C26 C27 C28 121.6(4) . . ? 
C26 C27 H27 119.2 . . ? 
C28 C27 H27 119.2 . . ? 
C29 C28 C27 122.5(4) . . ? 
C29 C28 H28 118.8 . . ? 
C27 C28 H28 118.8 . . ? 
C28 C29 C20 115.5(4) . . ? 
C28 C29 Ir2 130.2(3) . . ? 
C20 C29 Ir2 114.1(3) . . ? 
C65 C67 H67A 109.5 . . ? 
C65 C67 H67B 109.5 . . ? 
H67A C67 H67B 109.5 . . ? 
C65 C67 H67C 109.5 . . ? 
H67A C67 H67C 109.5 . . ? 
H67B C67 H67C 109.5 . . ? 
C73 C68 C69 118.1(4) . . ? 
C73 C68 P22 123.4(3) . . ? 
C69 C68 P22 117.8(3) . . ? 
C70 C69 C68 119.3(4) . . ? 
C70 C69 N2 123.6(4) . . ? 
C68 C69 N2 117.1(3) . . ? 
C69 C70 C71 120.6(4) . . ? 
C69 C70 H70 119.7 . . ? 
C71 C70 H70 119.7 . . ? 
C72 C71 C70 121.2(4) . . ? 
C72 C71 H71 119.4 . . ? 
C70 C71 H71 119.4 . . ? 
C71 C72 C73 117.3(4) . . ? 
C71 C72 C74 121.5(4) . . ? 
C73 C72 C74 121.2(4) . . ? 
C72 C73 C68 122.9(4) . . ? 
C72 C73 H73 118.6 . . ? 
C68 C73 H73 118.6 . . ? 
C72 C74 H74A 109.5 . . ? 
C72 C74 H74B 109.5 . . ? 
H74A C74 H74B 109.5 . . ? 
C72 C74 H74C 109.5 . . ? 
H74A C74 H74C 109.5 . . ? 
H74B C74 H74C 109.5 . . ? 
C76 C75 C80 118.4(4) . . ? 
C76 C75 P21 120.5(3) . . ? 
C80 C75 P21 120.5(3) . . ? 
C77 C76 C75 118.9(4) . . ? 
C77 C76 N2 119.9(4) . . ? 
C75 C76 N2 121.0(3) . . ? 
C78 C77 C76 121.4(4) . . ? 
C78 C77 H77 119.3 . . ? 
C76 C77 H77 119.3 . . ? 
C77 C78 C79 121.3(4) . . ? 
C77 C78 H78 119.4 . . ? 
C79 C78 H78 119.4 . . ? 
C80 C79 C78 117.0(4) . . ? 
C80 C79 C81 121.6(4) . . ? 
C78 C79 C81 121.5(4) . . ? 
C79 C80 C75 123.0(4) . . ? 
C79 C80 H80 118.5 . . ? 
C75 C80 H80 118.5 . . ? 
C79 C81 H81A 109.5 . . ? 
C79 C81 H81B 109.5 . . ? 
H81A C81 H81B 109.5 . . ? 
C79 C81 H81C 109.5 . . ? 
H81A C81 H81C 109.5 . . ? 
H81B C81 H81C 109.5 . . ? 
C87 C82 C84 117.9(5) . . ? 
C87 C82 C88 122.4(5) . . ? 
C84 C82 C88 119.7(5) . . ? 
C85 C83 C84 120.7(5) . . ? 
C85 C83 H83 119.6 . . ? 
C84 C83 H83 119.6 . . ? 
C83 C84 C82 119.7(5) . . ? 
C83 C84 H84 120.2 . . ? 
C82 C84 H84 120.2 . . ? 
C83 C85 C86 120.4(5) . . ? 
C83 C85 H85 119.8 . . ? 
C86 C85 H85 119.8 . . ? 
C87 C86 C85 119.3(5) . . ? 
C87 C86 H86 120.4 . . ? 
C85 C86 H86 120.4 . . ? 
C86 C87 C82 122.0(5) . . ? 
C86 C87 H87 119.0 . . ? 
C82 C87 H87 119.0 . . ? 
C82 C88 H88A 109.5 . . ? 
C82 C88 H88B 109.5 . . ? 
H88A C88 H88B 109.5 . . ? 
C82 C88 H88C 109.5 . . ? 
H88A C88 H88C 109.5 . . ? 
H88B C88 H88C 109.5 . . ? 
C90 C89 C94 119.4(5) . . ? 
C90 C89 H89 120.3 . . ? 
C94 C89 H89 120.3 . . ? 
C89 C90 C91 121.6(5) . . ? 
C89 C90 H90 119.2 . . ? 
C91 C90 H90 119.2 . . ? 
C90 C91 C92 118.9(5) . . ? 
C90 C91 C95 122.1(5) . . ? 
C92 C91 C95 118.9(5) . . ? 
C93 C92 C91 119.3(5) . . ? 
C93 C92 H92 120.3 . . ? 
C91 C92 H92 120.3 . . ? 
C92 C93 C94 120.4(5) . . ? 
C92 C93 H93 119.8 . . ? 
C94 C93 H93 119.8 . . ? 
C89 C94 C93 120.5(5) . . ? 
C89 C94 H94 119.8 . . ? 
C93 C94 H94 119.8 . . ? 
C91 C95 H95A 109.5 . . ? 
C91 C95 H95B 109.5 . . ? 
H95A C95 H95B 109.5 . . ? 
C91 C95 H95C 109.5 . . ? 
H95A C95 H95C 109.5 . . ? 
H95B C95 H95C 109.5 . . ? 
C65 C66 H66A 109.5 . . ? 
C65 C66 H66B 109.5 . . ? 
H66A C66 H66B 109.5 . . ? 
C65 C66 H66C 109.5 . . ? 
H66A C66 H66C 109.5 . . ? 
H66B C66 H66C 109.5 . . ? 
C66 C65 C67 112.2(4) . . ? 
C66 C65 P22 110.0(3) . . ? 
C67 C65 P22 117.8(3) . . ? 
C66 C65 H65 105.2 . . ? 
C67 C65 H65 105.2 . . ? 
P22 C65 H65 105.2 . . ? 
C62 C64 H64A 109.5 . . ? 
C62 C64 H64B 109.5 . . ? 
H64A C64 H64B 109.5 . . ? 
C62 C64 H64C 109.5 . . ? 
H64A C64 H64C 109.5 . . ? 
H64B C64 H64C 109.5 . . ? 
C62 C63 H63A 109.5 . . ? 
C62 C63 H63B 109.5 . . ? 
H63A C63 H63B 109.5 . . ? 
C62 C63 H63C 109.5 . . ? 
H63A C63 H63C 109.5 . . ? 
H63B C63 H63C 109.5 . . ? 
C64 C62 C63 109.5(4) . . ? 
C64 C62 P22 118.5(3) . . ? 
C63 C62 P22 109.8(3) . . ? 
C64 C62 H62 106.1 . . ? 
C63 C62 H62 106.1 . . ? 
P22 C62 H62 106.1 . . ? 
C37 C43 C42 118.4(4) . . ? 
C37 C43 P11 118.1(3) . . ? 
C42 C43 P11 122.8(3) . . ? 
C40 C42 C43 122.3(4) . . ? 
C40 C42 H42 118.8 . . ? 
C43 C42 H42 118.8 . . ? 
C40 C41 H41A 109.5 . . ? 
C40 C41 H41B 109.5 . . ? 
H41A C41 H41B 109.5 . . ? 
C40 C41 H41C 109.5 . . ? 
H41A C41 H41C 109.5 . . ? 
H41B C41 H41C 109.5 . . ? 
C39 C40 C42 117.4(4) . . ? 
C39 C40 C41 121.5(4) . . ? 
C42 C40 C41 121.1(4) . . ? 
C40 C39 C38 121.5(4) . . ? 
C40 C39 H39 119.3 . . ? 
C38 C39 H39 119.3 . . ? 
C37 C38 C39 120.4(4) . . ? 
C37 C38 H38 119.8 . . ? 
C39 C38 H38 119.8 . . ? 
C38 C37 C43 119.3(4) . . ? 
C38 C37 N1 123.2(4) . . ? 
C43 C37 N1 117.5(3) . . ? 
C33 C36 H36A 109.5 . . ? 
C33 C36 H36B 109.5 . . ? 
H36A C36 H36B 109.5 . . ? 
C33 C36 H36C 109.5 . . ? 
H36A C36 H36C 109.5 . . ? 
H36B C36 H36C 109.5 . . ? 
C34 C35 C30 121.7(4) . . ? 
C34 C35 H35 119.1 . . ? 
C30 C35 H35 119.1 . . ? 
C35 C34 C33 121.1(4) . . ? 
C35 C34 H34 119.5 . . ? 
C33 C34 H34 119.5 . . ? 
C32 C33 C34 116.9(4) . . ? 
C32 C33 C36 121.8(4) . . ? 
C34 C33 C36 121.3(4) . . ? 
C33 C32 C31 123.6(4) . . ? 
C33 C32 H32 118.2 . . ? 
C31 C32 H32 118.2 . . ? 
C30 C31 C32 117.9(4) . . ? 
C30 C31 P12 120.3(3) . . ? 
C32 C31 P12 121.4(3) . . ? 
C35 C30 C31 118.7(4) . . ? 
C35 C30 N1 120.1(4) . . ? 
C31 C30 N1 121.0(4) . . ? 
C48 C44 C46 109.9(3) . . ? 
C48 C44 P12 118.0(3) . . ? 
C46 C44 P12 110.0(3) . . ? 
C48 C44 H44 106.1 . . ? 
C46 C44 H44 106.1 . . ? 
P12 C44 H44 106.1 . . ? 
C49 C45 C47 110.5(4) . . ? 
C49 C45 P12 113.5(3) . . ? 
C47 C45 P12 111.9(3) . . ? 
C49 C45 H45 106.8 . . ? 
C47 C45 H45 106.8 . . ? 
P12 C45 H45 106.8 . . ? 
C45 C47 H47A 109.5 . . ? 
C45 C47 H47B 109.5 . . ? 
H47A C47 H47B 109.5 . . ? 
C45 C47 H47C 109.5 . . ? 
H47A C47 H47C 109.5 . . ? 
H47B C47 H47C 109.5 . . ? 
C44 C46 H46A 109.5 . . ? 
C44 C46 H46B 109.5 . . ? 
H46A C46 H46B 109.5 . . ? 
C44 C46 H46C 109.5 . . ? 
H46A C46 H46C 109.5 . . ? 
H46B C46 H46C 109.5 . . ? 
C13 C14 C15 120.4(4) . . ? 
C13 C14 H14 119.8 . . ? 
C15 C14 H14 119.8 . . ? 
C14 C13 C12 121.0(4) . . ? 
C14 C13 H13 119.5 . . ? 
C12 C13 H13 119.5 . . ? 
 
_diffrn_measured_fraction_theta_max    1.000 
_diffrn_reflns_theta_full              25.00 
_diffrn_measured_fraction_theta_full   1.000 
_refine_diff_density_max    1.901 
_refine_diff_density_min   -0.778 
_refine_diff_density_rms    0.114 
_iucr_refine_instructions_details
;
TITL SV7 in P2(1)/n
CELL 0.71073  21.0895  11.2859  32.3611  90.000  99.716  90.000
ZERR    4.00   0.0020   0.0011   0.0031   0.000   0.002   0.000
LATT  1
SYMM 0.5-X, 0.5+Y, 0.5-Z
SFAC C H N P CL IR
UNIT 344 436 8 16 8 8
LIST 6 ! automatically inserted. Change 6 to 4 for CHECKCIF!!
 
TEMP -153
size 0.028 0.026 0.025
Acta 50
Bond $H
Omit 0 50
EADP C21 C38
 
L.S. 4
BOND
FMAP 2
PLAN 20
 
WGHT      0.0278     12.2284 
FVAR       0.03678
MOLE   1
IR1   6    0.637116    0.641123    0.370200    11.00000    0.01225    0.01207 =
         0.00984   -0.00001    0.00340   -0.00246
H1    2    0.570150    0.571681    0.363222    11.00000    0.04445
N1    3    0.726921    0.752053    0.381025    11.00000    0.01350    0.01443 =
         0.01143   -0.00016    0.00336    0.00045
CL1   5    0.699991    0.455152    0.384785    11.00000    0.02072    0.01696 =
         0.01629    0.00421    0.00546    0.00171
IR2   6    0.145506    0.616656    0.373593    11.00000    0.01218    0.01401 =
         0.00965   -0.00067    0.00320   -0.00355
N2    3    0.236225    0.724747    0.384424    11.00000    0.01180    0.01139 =
         0.01198   -0.00252    0.00447   -0.00092
CL2   5    0.207979    0.428869    0.386101    11.00000    0.02390    0.01478 =
         0.01660    0.00304    0.00640    0.00091
P11   4    0.663879    0.624220    0.303618    11.00000    0.01295    0.01357 =
         0.01007   -0.00045    0.00292   -0.00163
C11   1    0.706730    0.870148    0.361322    11.00000    0.02141    0.01229 =
         0.00430    0.00149    0.00453   -0.00131
C10   1    0.639601    0.893677    0.353306    11.00000    0.02041    0.01437 =
         0.01029    0.00036    0.00362   -0.00124
P12   4    0.636668    0.658709    0.440524    11.00000    0.01478    0.01258 =
         0.01084    0.00012    0.00461   -0.00286
C12   1    0.750045    0.951248    0.351740    11.00000    0.02040    0.02127 =
         0.01151   -0.00220    0.00655   -0.00486
AFIX  43
H12   2    0.794293    0.931081    0.354492    11.00000   -1.20000
AFIX   0
C15   1    0.619164    1.008562    0.339277    11.00000    0.03162    0.01563 =
         0.00755   -0.00449    0.00292    0.00244
C16   1    0.552524    1.031621    0.330311    11.00000    0.03193    0.01654 =
         0.01369    0.00435   -0.00238    0.00760
AFIX  43
H16   2    0.537408    1.108965    0.322328    11.00000   -1.20000
AFIX   0
C17   1    0.509828    0.942200    0.333161    11.00000    0.02180    0.03260 =
         0.01593    0.00255   -0.00245    0.00921
AFIX  43
H17   2    0.465036    0.958510    0.326972    11.00000   -1.20000
AFIX   0
C18   1    0.530330    0.826606    0.345007    11.00000    0.01550    0.01923 =
         0.01687   -0.00271    0.00097    0.00144
AFIX  43
H18   2    0.499263    0.765940    0.345584    11.00000   -1.20000
AFIX   0
C58   1    0.103556    0.854832    0.462268    11.00000    0.02785    0.02729 =
         0.02252   -0.01043    0.00902    0.00027
AFIX 137
H58A  2    0.089916    0.872874    0.432471    11.00000   -1.50000
H58B  2    0.149207    0.874420    0.470532    11.00000   -1.50000
H58C  2    0.078036    0.901730    0.478977    11.00000   -1.50000
AFIX   0
C57   1    0.022840    0.689446    0.457079    11.00000    0.02013    0.03598 =
         0.03479   -0.00068    0.01340   -0.00179
AFIX 137
H57A  2    0.010154    0.698149    0.426676    11.00000   -1.50000
H57B  2   -0.003792    0.741322    0.471387    11.00000   -1.50000
H57C  2    0.016806    0.606947    0.465032    11.00000   -1.50000
AFIX   0
C56   1    0.093477    0.723587    0.469760    11.00000    0.02049    0.02364 =
         0.01514   -0.00365    0.00435   -0.00520
AFIX  13
H56   2    0.104980    0.710039    0.500656    11.00000   -1.20000
AFIX   0
C55   1    0.673421    0.759449    0.229188    11.00000    0.02911    0.02294 =
         0.01835    0.00468    0.01089    0.00256
AFIX 137
H55A  2    0.718272    0.773581    0.242044    11.00000   -1.50000
H55B  2    0.656660    0.829081    0.212803    11.00000   -1.50000
H55C  2    0.671133    0.690209    0.210720    11.00000   -1.50000
AFIX   0
C54   1    0.664365    0.458573    0.233804    11.00000    0.02259    0.02317 =
         0.02136   -0.00718    0.00536   -0.00454
AFIX 137
H54A  2    0.707528    0.484780    0.230500    11.00000   -1.50000
H54B  2    0.632100    0.506563    0.215853    11.00000   -1.50000
H54C  2    0.658776    0.375046    0.225730    11.00000   -1.50000
AFIX   0
C53   1    0.591631    0.417040    0.285417    11.00000    0.02479    0.01584 =
         0.02606   -0.00493    0.00663   -0.00849
AFIX 137
H53A  2    0.588016    0.417611    0.315213    11.00000   -1.50000
H53B  2    0.589750    0.335179    0.275181    11.00000   -1.50000
H53C  2    0.556092    0.462586    0.269523    11.00000   -1.50000
AFIX   0
C52   1    0.562621    0.714831    0.245303    11.00000    0.02102    0.02723 =
         0.01920    0.00239    0.00078   -0.00002
AFIX 137
H52A  2    0.537850    0.706702    0.268189    11.00000   -1.50000
H52B  2    0.558797    0.641945    0.228606    11.00000   -1.50000
H52C  2    0.545883    0.781733    0.227429    11.00000   -1.50000
AFIX   0
C51   1    0.633180    0.736795    0.263493    11.00000    0.01729    0.01698 =
         0.00904   -0.00175    0.00017   -0.00104
AFIX  13
H51   2    0.633749    0.813260    0.279164    11.00000   -1.20000
AFIX   0
C50   1    0.656062    0.473161    0.279660    11.00000    0.01823    0.01233 =
         0.01773   -0.00197    0.00251   -0.00160
AFIX  13
H50   2    0.690411    0.423735    0.296513    11.00000   -1.20000
AFIX   0
C61   1    0.093917    0.403774    0.451473    11.00000    0.02893    0.02288 =
         0.02364    0.00317    0.00496   -0.00974
AFIX 137
H61A  2    0.094712    0.398792    0.421332    11.00000   -1.50000
H61B  2    0.052756    0.437359    0.455939    11.00000   -1.50000
H61C  2    0.099031    0.324312    0.463796    11.00000   -1.50000
AFIX   0
C60   1    0.148842    0.483019    0.472279    11.00000    0.02266    0.01662 =
         0.01799    0.00347    0.00734   -0.00563
AFIX  13
H60   2    0.189498    0.442781    0.468036    11.00000   -1.20000
AFIX   0
C59   1    0.150222    0.486500    0.519751    11.00000    0.03571    0.02530 =
         0.01699    0.00462    0.00552   -0.00609
AFIX 137
H59A  2    0.150719    0.405401    0.530625    11.00000   -1.50000
H59B  2    0.111928    0.527873    0.525730    11.00000   -1.50000
H59C  2    0.188901    0.528451    0.533264    11.00000   -1.50000
AFIX   0
C49   1    0.589944    0.888391    0.454800    11.00000    0.02175    0.02061 =
         0.01812   -0.00386    0.00379    0.00407
AFIX 137
H49A  2    0.565440    0.936261    0.471869    11.00000   -1.50000
H49B  2    0.573893    0.903089    0.425026    11.00000   -1.50000
H49C  2    0.635550    0.909969    0.461323    11.00000   -1.50000
AFIX   0
C48   1    0.639424    0.525788    0.517952    11.00000    0.04017    0.02170 =
         0.01585    0.00802    0.00584   -0.00735
AFIX 137
H48A  2    0.640783    0.445771    0.529830    11.00000   -1.50000
H48B  2    0.600362    0.566266    0.523048    11.00000   -1.50000
H48C  2    0.677315    0.570363    0.531231    11.00000   -1.50000
AFIX   0
C19   1    0.594952    0.799978    0.355812    11.00000    0.02172    0.01346 =
         0.00764   -0.00303    0.00865   -0.00264
P21   4    0.147106    0.627486    0.444287    11.00000    0.01474    0.01665 =
         0.01108   -0.00070    0.00404   -0.00459
C20   1    0.149735    0.869175    0.358353    11.00000    0.02195    0.02091 =
         0.00257   -0.00214    0.00338   -0.00133
C21   1    0.216511    0.843261    0.365561    11.00000    0.01920    0.01474 =
         0.00882    0.00065    0.00475   -0.00348
P22   4    0.170235    0.602212    0.306780    11.00000    0.01239    0.01409 =
         0.00956   -0.00157    0.00322   -0.00204
C22   1    0.260405    0.923410    0.355668    11.00000    0.02033    0.01789 =
         0.00963   -0.00033    0.00224   -0.00429
AFIX  43
H22   2    0.304428    0.901902    0.358090    11.00000   -1.20000
AFIX   0
C23   1    0.240064    1.037802    0.341896    11.00000    0.03230    0.01919 =
         0.01255   -0.00107    0.00909   -0.00679
AFIX  43
H23   2    0.270781    1.093539    0.335546    11.00000   -1.20000
AFIX   0
C24   1    0.177060    1.069584    0.337560    11.00000    0.04024    0.01330 =
         0.01306   -0.00022    0.00603    0.00280
AFIX  43
H24   2    0.164560    1.148541    0.329934    11.00000   -1.20000
AFIX   0
C25   1    0.129925    0.985398    0.344371    11.00000    0.02904    0.01610 =
         0.00528   -0.00035    0.00251    0.00136
C26   1    0.063431    1.010636    0.336509    11.00000    0.02463    0.02241 =
         0.01775    0.00146    0.00303    0.00899
AFIX  43
H26   2    0.048851    1.088853    0.329429    11.00000   -1.20000
AFIX   0
C27   1    0.020349    0.922512    0.339114    11.00000    0.01719    0.03699 =
         0.02127   -0.00138   -0.00133    0.00703
AFIX  43
H27   2   -0.024353    0.939681    0.332998    11.00000   -1.20000
AFIX   0
C28   1    0.040389    0.806410    0.350658    11.00000    0.01767    0.02518 =
         0.02165    0.00007    0.00411   -0.00001
AFIX  43
H28   2    0.008638    0.747202    0.351575    11.00000   -1.20000
AFIX   0
C29   1    0.104734    0.775256    0.360738    11.00000    0.01536    0.02224 =
         0.00582   -0.00405    0.00458   -0.00536
C67   1    0.175036    0.739471    0.231645    11.00000    0.03245    0.02463 =
         0.01657    0.00567    0.00560    0.00623
AFIX 137
H67A  2    0.157742    0.810433    0.216282    11.00000   -1.50000
H67B  2    0.170080    0.671195    0.212662    11.00000   -1.50000
H67C  2    0.220747    0.751409    0.242806    11.00000   -1.50000
AFIX   0
C68   1    0.257525    0.626355    0.319948    11.00000    0.01802    0.01184 =
         0.01496    0.00140    0.00494   -0.00295
C69   1    0.282374    0.667329    0.360457    11.00000    0.01305    0.01466 =
         0.01286    0.00224    0.00735   -0.00140
C70   1    0.347244    0.656424    0.375404    11.00000    0.01544    0.01647 =
         0.01226    0.00121    0.00219   -0.00127
AFIX  43
H70   2    0.363759    0.677997    0.403538    11.00000   -1.20000
AFIX   0
C71   1    0.388818    0.614090    0.349667    11.00000    0.01191    0.01719 =
         0.02235    0.00431    0.00385    0.00043
AFIX  43
H71   2    0.433126    0.604157    0.360846    11.00000   -1.20000
AFIX   0
C72   1    0.366810    0.586275    0.308182    11.00000    0.01809    0.01280 =
         0.01530    0.00134    0.00653    0.00163
C73   1    0.300844    0.589502    0.294529    11.00000    0.01779    0.01195 =
         0.01302   -0.00106    0.00409   -0.00026
AFIX  43
H73   2    0.284523    0.565520    0.266620    11.00000   -1.20000
AFIX   0
C74   1    0.412187    0.550250    0.279197    11.00000    0.02110    0.02340 =
         0.02494   -0.00224    0.00937   -0.00087
AFIX 137
H74A  2    0.424880    0.620417    0.264725    11.00000   -1.50000
H74B  2    0.390729    0.493527    0.258513    11.00000   -1.50000
H74C  2    0.450508    0.513343    0.295474    11.00000   -1.50000
AFIX   0
C75   1    0.225219    0.700834    0.460439    11.00000    0.01346    0.01230 =
         0.01162    0.00000    0.00036   -0.00302
C76   1    0.259519    0.744604    0.430498    11.00000    0.01623    0.01115 =
         0.01018   -0.00127    0.00277   -0.00074
C77   1    0.312726    0.815891    0.443453    11.00000    0.01418    0.01671 =
         0.01509    0.00175    0.00333   -0.00363
AFIX  43
H77   2    0.335509    0.847982    0.423104    11.00000   -1.20000
AFIX   0
C78   1    0.333222    0.841128    0.485224    11.00000    0.01879    0.01260 =
         0.01555   -0.00218    0.00145   -0.00315
AFIX  43
H78   2    0.370594    0.888307    0.493183    11.00000   -1.20000
AFIX   0
C79   1    0.300285    0.798902    0.515929    11.00000    0.02217    0.01293 =
         0.01118    0.00040    0.00270   -0.00130
C80   1    0.246874    0.728742    0.502661    11.00000    0.02218    0.01859 =
         0.00844   -0.00107    0.00594   -0.00565
AFIX  43
H80   2    0.223842    0.698105    0.523123    11.00000   -1.20000
AFIX   0
C81   1    0.320587    0.831299    0.561481    11.00000    0.02858    0.01983 =
         0.01338   -0.00358    0.00418   -0.00780
AFIX 137
H81A  2    0.290742    0.890228    0.569476    11.00000   -1.50000
H81B  2    0.364160    0.864413    0.565701    11.00000   -1.50000
H81C  2    0.320045    0.760294    0.578850    11.00000   -1.50000
AFIX   0
C82   1    0.066438    0.854019    0.584656    11.00000    0.04216    0.03708 =
         0.02399   -0.00410   -0.00374    0.01848
C83   1    0.163510    0.739165    0.600078    11.00000    0.02067    0.02916 =
         0.02464   -0.00732   -0.00010   -0.00151
AFIX  43
H83   2    0.208084    0.729746    0.599395    11.00000   -1.20000
AFIX   0
C84   1    0.132072    0.839211    0.583088    11.00000    0.02886    0.02590 =
         0.03116   -0.00264    0.00636    0.00046
AFIX  43
H84   2    0.154675    0.897951    0.570365    11.00000   -1.20000
AFIX   0
C85   1    0.131187    0.652851    0.617997    11.00000    0.04282    0.04033 =
         0.02466   -0.00031    0.00533   -0.00414
AFIX  43
H85   2    0.153367    0.583646    0.629171    11.00000   -1.20000
AFIX   0
C86   1    0.066790    0.665887    0.619889    11.00000    0.05042    0.04211 =
         0.04649    0.00570    0.01049   -0.00953
AFIX  43
H86   2    0.044466    0.606065    0.632297    11.00000   -1.20000
AFIX   0
C87   1    0.035546    0.765272    0.603811    11.00000    0.02844    0.05273 =
         0.03796   -0.01080    0.00966   -0.00755
AFIX  43
H87   2   -0.008653    0.774617    0.605666    11.00000   -1.20000
AFIX   0
C88   1    0.032538    0.960119    0.565898    11.00000    0.07110    0.07109 =
         0.05182    0.01740    0.02431    0.03214
AFIX 137
H88A  2    0.011484    0.942177    0.537219    11.00000   -1.50000
H88B  2    0.063480    1.024650    0.565359    11.00000   -1.50000
H88C  2    0.000080    0.984164    0.582628    11.00000   -1.50000
AFIX   0
C89   1    0.428725    0.086637    0.429537    11.00000    0.03951    0.02800 =
         0.03166    0.00202    0.01208    0.00600
AFIX  43
H89   2    0.443838    0.017663    0.444943    11.00000   -1.20000
AFIX   0
C90   1    0.468806    0.150003    0.409069    11.00000    0.02946    0.03565 =
         0.02594   -0.00100    0.00244    0.00471
AFIX  43
H90   2    0.511890    0.123936    0.410166    11.00000   -1.20000
AFIX   0
C91   1    0.448411    0.251107    0.386782    11.00000    0.03234    0.03114 =
         0.02101   -0.01011    0.01135   -0.01449
C92   1    0.384466    0.288695    0.385073    11.00000    0.03947    0.02283 =
         0.01578   -0.00433    0.00344   -0.00074
AFIX  43
H92   2    0.369228    0.357643    0.369693    11.00000   -1.20000
AFIX   0
C93   1    0.344226    0.224657    0.405884    11.00000    0.02277    0.02612 =
         0.02725   -0.00720    0.00382    0.00291
AFIX  43
H93   2    0.301148    0.250184    0.405252    11.00000   -1.20000
AFIX   0
C94   1    0.366055    0.123506    0.427687    11.00000    0.02768    0.02212 =
         0.03149   -0.00871    0.00325   -0.00186
AFIX  43
H94   2    0.337654    0.078965    0.441525    11.00000   -1.20000
AFIX   0
C95   1    0.490749    0.317174    0.361996    11.00000    0.05522    0.03651 =
         0.03115   -0.00229    0.00478   -0.01200
AFIX 137
H95A  2    0.477084    0.300836    0.332076    11.00000   -1.50000
H95B  2    0.535435    0.291589    0.370591    11.00000   -1.50000
H95C  2    0.487461    0.402375    0.367087    11.00000   -1.50000
AFIX   0
C66   1    0.066813    0.696396    0.252654    11.00000    0.01836    0.03102 =
         0.01855    0.00074   -0.00335    0.00048
AFIX 137
H66A  2    0.061052    0.630739    0.232550    11.00000   -1.50000
H66B  2    0.047595    0.768481    0.239021    11.00000   -1.50000
H66C  2    0.045769    0.676969    0.276577    11.00000   -1.50000
AFIX   0
C65   1    0.138349    0.716601    0.267905    11.00000    0.01415    0.02299 =
         0.01224   -0.00437    0.00018    0.00048
AFIX  13
H65   2    0.141019    0.792603    0.283991    11.00000   -1.20000
AFIX   0
C64   1    0.168113    0.438783    0.236259    11.00000    0.02765    0.02519 =
         0.02087   -0.00723    0.00363   -0.00059
AFIX 137
H64A  2    0.134418    0.484493    0.218607    11.00000   -1.50000
H64B  2    0.164287    0.355056    0.228194    11.00000   -1.50000
H64C  2    0.210428    0.468546    0.232513    11.00000   -1.50000
AFIX   0
C63   1    0.096227    0.397432    0.288820    11.00000    0.02861    0.02079 =
         0.02801   -0.01021    0.00821   -0.01171
AFIX 137
H63A  2    0.094137    0.314630    0.279569    11.00000   -1.50000
H63B  2    0.060735    0.442003    0.272437    11.00000   -1.50000
H63C  2    0.092731    0.401058    0.318609    11.00000   -1.50000
AFIX   0
C62   1    0.160622    0.451683    0.282305    11.00000    0.01624    0.01993 =
         0.01669   -0.00492    0.00161   -0.00234
AFIX  13
H62   2    0.194916    0.401118    0.298673    11.00000   -1.20000
AFIX   0
C43   1    0.751070    0.649638    0.318206    11.00000    0.01152    0.01043 =
         0.01481    0.00036    0.00240   -0.00191
C42   1    0.795876    0.609587    0.293709    11.00000    0.01774    0.01212 =
         0.01296   -0.00057    0.00373   -0.00033
AFIX  43
H42   2    0.780621    0.582468    0.266025    11.00000   -1.20000
AFIX   0
C41   1    0.908640    0.568248    0.280976    11.00000    0.01904    0.02653 =
         0.02282   -0.00119    0.00798    0.00093
AFIX 137
H41A  2    0.945360    0.529189    0.298250    11.00000   -1.50000
H41B  2    0.923755    0.637136    0.266965    11.00000   -1.50000
H41C  2    0.887375    0.512483    0.259868    11.00000   -1.50000
AFIX   0
C40   1    0.861456    0.608281    0.308518    11.00000    0.02079    0.00952 =
         0.01903    0.00312    0.00770   -0.00420
C39   1    0.881742    0.641120    0.349712    11.00000    0.01226    0.02046 =
         0.02007    0.00362    0.00119   -0.00442
AFIX  43
H39   2    0.925962    0.633791    0.361536    11.00000   -1.20000
AFIX   0
C38   1    0.838799    0.684794    0.374354    11.00000    0.01920    0.01474 =
         0.00882    0.00065    0.00475   -0.00348
AFIX  43
H38   2    0.854121    0.707792    0.402508    11.00000   -1.20000
AFIX   0
C37   1    0.774127    0.694863    0.358117    11.00000    0.01467    0.01218 =
         0.01269    0.00471    0.00374   -0.00097
C36   1    0.811837    0.861152    0.557950    11.00000    0.02827    0.02700 =
         0.01048   -0.00173   -0.00033   -0.00736
AFIX 137
H36A  2    0.806749    0.791715    0.575279    11.00000   -1.50000
H36B  2    0.785569    0.926458    0.565722    11.00000   -1.50000
H36C  2    0.857146    0.885110    0.562473    11.00000   -1.50000
AFIX   0
C35   1    0.802208    0.847383    0.439751    11.00000    0.01907    0.01722 =
         0.01623    0.00125    0.00582   -0.00394
AFIX  43
H35   2    0.824715    0.879858    0.419324    11.00000   -1.20000
AFIX   0
C34   1    0.822976    0.872998    0.481440    11.00000    0.02012    0.02003 =
         0.01455   -0.00304    0.00151   -0.00825
AFIX  43
H34   2    0.860264    0.920483    0.489267    11.00000   -1.20000
AFIX   0
C33   1    0.790305    0.830553    0.512238    11.00000    0.02061    0.01538 =
         0.01485   -0.00135    0.00052    0.00055
C32   1    0.736499    0.762037    0.499023    11.00000    0.02627    0.01606 =
         0.01135   -0.00182    0.00888   -0.00286
AFIX  43
H32   2    0.713194    0.732908    0.519579    11.00000   -1.20000
AFIX   0
C31   1    0.714258    0.732948    0.456792    11.00000    0.01412    0.01220 =
         0.01361    0.00082    0.00414   -0.00001
C30   1    0.749109    0.775163    0.426768    11.00000    0.01975    0.01229 =
         0.01015    0.00299    0.00042   -0.00075
C44   1    0.639130    0.517926    0.470703    11.00000    0.01851    0.01587 =
         0.01380    0.00328    0.00346   -0.00290
AFIX  13
H44   2    0.680281    0.477941    0.467372    11.00000   -1.20000
AFIX   0
C45   1    0.582079    0.757317    0.464431    11.00000    0.01769    0.02259 =
         0.01254   -0.00329    0.00538    0.00068
AFIX  13
H45   2    0.593829    0.748034    0.495513    11.00000   -1.20000
AFIX   0
C47   1    0.511608    0.720030    0.452520    11.00000    0.01828    0.03039 =
         0.03354   -0.00440    0.01101    0.00035
AFIX 137
H47A  2    0.484841    0.770079    0.467375    11.00000   -1.50000
H47B  2    0.506952    0.636992    0.460344    11.00000   -1.50000
H47C  2    0.497894    0.729137    0.422212    11.00000   -1.50000
AFIX   0
C46   1    0.585046    0.435404    0.450436    11.00000    0.02939    0.01969 =
         0.02334    0.00369    0.00814   -0.00627
AFIX 137
H46A  2    0.590846    0.357055    0.463588    11.00000   -1.50000
H46B  2    0.586246    0.428168    0.420400    11.00000   -1.50000
H46C  2    0.543441    0.468188    0.454354    11.00000   -1.50000
AFIX   0
C14   1    0.665798    1.094119    0.332583    11.00000    0.04000    0.01083 =
         0.01774    0.00185    0.00190   -0.00176
AFIX  43
H14   2    0.652637    1.172388    0.324412    11.00000   -1.20000
AFIX   0
C13   1    0.728850    1.064762    0.337779    11.00000    0.03326    0.01850 =
         0.01117    0.00117    0.00834   -0.00742
AFIX  43
H13   2    0.759275    1.121737    0.331904    11.00000   -1.20000
MOLE   2
REM #####
REM #####
REM #####
HKLF 4
 
REM  SV7 in P2(1)/n
REM R1 =  0.0295 for  10991 Fo > 4sig(Fo)  and  0.0434 for all  13383 data
REM    885 parameters refined using      0 restraints
 
END  
     
WGHT      0.0278     12.2284 
REM Highest difference peak  1.901,  deepest hole -0.778,  1-sigma level  0.114
Q1    1   0.1389  0.6985  0.3717  11.00000  0.05    1.90
Q2    1   0.1249  0.6819  0.3651  11.00000  0.05    1.89
Q3    1   0.6425  0.5611  0.3732  11.00000  0.05    1.88
Q4    1   0.6770  0.6329  0.3917  11.00000  0.05    1.06
Q5    1   0.6443  0.7188  0.3794  11.00000  0.05    0.86
Q6    1   0.0854  0.5462  0.3657  11.00000  0.05    0.75
Q7    1   0.1389  0.5815  0.3767  11.00000  0.05    0.74
Q8    1   0.6058  0.7428  0.3631  11.00000  0.05    0.73
Q9    1   0.6374  0.6594  0.3589  11.00000  0.05    0.65
Q10   1   0.1819  0.5127  0.3824  11.00000  0.05    0.65
Q11   1   0.6212  0.6424  0.3655  11.00000  0.05    0.60
Q12   1   0.6582  0.5455  0.2887  11.00000  0.05    0.58
Q13   1   0.1244  0.6902  0.4377  11.00000  0.05    0.58
Q14   1   0.0051  0.6817  0.6384  11.00000  0.05    0.58
Q15   1   0.5635  0.8180  0.3642  11.00000  0.05    0.57
Q16   1   0.6391  0.5855  0.4540  11.00000  0.05    0.54
Q17   1   0.1779  0.8648  0.3635  11.00000  0.05    0.54
Q18   1   0.0825  0.9149  0.5708  11.00000  0.05    0.51
Q19   1   0.1448  0.6276  0.3315  11.00000  0.05    0.50
Q20   1   0.1761  0.6607  0.4123  11.00000  0.05    0.50


;
 
data_sv350 
 
_audit_creation_method            SHELXL-97 
_chemical_name_systematic 
; 
 ? 
; 
_chemical_name_common             ? 
_chemical_melting_point           ? 
_chemical_formula_moiety          ? 
_chemical_formula_sum 
 'C37 H55 Cl Ir N O P2' 
_chemical_formula_weight          819.41 
 
loop_ 
 _atom_type_symbol 
 _atom_type_description 
 _atom_type_scat_dispersion_real 
 _atom_type_scat_dispersion_imag 
 _atom_type_scat_source 
 'C'  'C'   0.0033   0.0016 
 'International Tables Vol C Tables 4.2.6.8 and 6.1.1.4' 
 'H'  'H'   0.0000   0.0000 
 'International Tables Vol C Tables 4.2.6.8 and 6.1.1.4' 
 'N'  'N'   0.0061   0.0033 
 'International Tables Vol C Tables 4.2.6.8 and 6.1.1.4' 
 'P'  'P'   0.1023   0.0942 
 'International Tables Vol C Tables 4.2.6.8 and 6.1.1.4' 
 'Cl'  'Cl'   0.1484   0.1585 
 'International Tables Vol C Tables 4.2.6.8 and 6.1.1.4' 
 'Ir'  'Ir'  -1.4442   7.9887 
 'International Tables Vol C Tables 4.2.6.8 and 6.1.1.4' 
 'O'  'O'   0.0106   0.0060 
 'International Tables Vol C Tables 4.2.6.8 and 6.1.1.4' 
 
_symmetry_cell_setting            'triclinic' 
_symmetry_space_group_name_H-M    'P-1' 
 
loop_ 
 _symmetry_equiv_pos_as_xyz 
 'x, y, z' 
 '-x, -y, -z' 
 
_cell_length_a                    10.9440(12) 
_cell_length_b                    11.9479(13) 
_cell_length_c                    15.3618(17) 
_cell_angle_alpha                 103.3016(19) 
_cell_angle_beta                  107.9995(18) 
_cell_angle_gamma                 102.2239(19) 
_cell_volume                      1770.2(3) 
_cell_formula_units_Z             2 
_cell_measurement_temperature     120(2) 
_cell_measurement_reflns_used     4940 
_cell_measurement_theta_min       2.62 
_cell_measurement_theta_max       25.38 
 
_exptl_crystal_description        'block' 
_exptl_crystal_colour             ? 
_exptl_crystal_size_max           0.02 
_exptl_crystal_size_mid           0.02 
_exptl_crystal_size_min           0.02 
_exptl_crystal_density_meas       ? 
_exptl_crystal_density_diffrn     1.537 
_exptl_crystal_density_method     'not measured' 
_exptl_crystal_F_000              832 
_exptl_absorpt_coefficient_mu     3.967 
_exptl_absorpt_correction_type    'multi-scan' 
_exptl_absorpt_correction_T_min   0.6550 
_exptl_absorpt_correction_T_max   0.7454 
_exptl_absorpt_process_details    'Bruker AXS area detector scaling and absorption correction' 
 
_exptl_special_details 
; 
 ? 
; 
 
_diffrn_ambient_temperature       120(2) 
_diffrn_radiation_wavelength      0.71073 
_diffrn_radiation_type            MoK\a 
_diffrn_radiation_source          'fine-focus sealed tube' 
_diffrn_radiation_monochromator   graphite 
_diffrn_measurement_device_type   'Bruker APEX-II' 
_diffrn_measurement_method        ? 
_diffrn_detector_area_resol_mean  ? 
_diffrn_standards_number          ? 
_diffrn_standards_interval_count  ? 
_diffrn_standards_interval_time   ? 
_diffrn_standards_decay_%         ? 
_diffrn_reflns_number             16032 
_diffrn_reflns_av_R_equivalents   0.0370 
_diffrn_reflns_av_sigmaI/netI     0.0581 
_diffrn_reflns_limit_h_min        -13 
_diffrn_reflns_limit_h_max        13 
_diffrn_reflns_limit_k_min        -14 
_diffrn_reflns_limit_k_max        14 
_diffrn_reflns_limit_l_min        -19 
_diffrn_reflns_limit_l_max        19 
_diffrn_reflns_theta_min          1.47 
_diffrn_reflns_theta_max          26.39 
_reflns_number_total              7214 
_reflns_number_gt                 6133 
_reflns_threshold_expression      >2sigma(I) 
 
_computing_data_collection        ? 
_computing_cell_refinement        ? 
_computing_data_reduction         ? 
_computing_structure_solution     'SHELXS-97 (Sheldrick, 1990)' 
_computing_structure_refinement   'SHELXL-97 (Sheldrick, 1997)' 
_computing_molecular_graphics     ? 
_computing_publication_material   ? 
 
_refine_special_details 
; 
 Refinement of F^2^ against ALL reflections.  The weighted R-factor wR and 
 goodness of fit S are based on F^2^, conventional R-factors R are based 
 on F, with F set to zero for negative F^2^. The threshold expression of 
 F^2^ > 2sigma(F^2^) is used only for calculating R-factors(gt) etc. and is 
 not relevant to the choice of reflections for refinement.  R-factors based 
 on F^2^ are statistically about twice as large as those based on F, and R- 
 factors based on ALL data will be even larger. 
; 
 
_refine_ls_structure_factor_coef  Fsqd  
_refine_ls_matrix_type            full 
_refine_ls_weighting_scheme       calc  
_refine_ls_weighting_details 
 'calc w=1/[\s^2^(Fo^2^)+(0.0205P)^2^+0.0000P] where P=(Fo^2^+2Fc^2^)/3' 
_atom_sites_solution_primary      direct 
_atom_sites_solution_secondary    difmap 
_atom_sites_solution_hydrogens    geom 
_refine_ls_hydrogen_treatment     mixed 
_refine_ls_extinction_method      none 
_refine_ls_extinction_coef        ? 
_refine_ls_number_reflns          7214 
_refine_ls_number_parameters      403 
_refine_ls_number_restraints      0 
_refine_ls_R_factor_all           0.0436 
_refine_ls_R_factor_gt            0.0306 
_refine_ls_wR_factor_ref          0.0530 
_refine_ls_wR_factor_gt           0.0504 
_refine_ls_goodness_of_fit_ref    0.994 
_refine_ls_restrained_S_all       0.994 
_refine_ls_shift/su_max           0.001 
_refine_ls_shift/su_mean          0.000 
 
loop_ 
 _atom_site_label 
 _atom_site_type_symbol 
 _atom_site_fract_x 
 _atom_site_fract_y 
 _atom_site_fract_z 
 _atom_site_U_iso_or_equiv 
 _atom_site_adp_type 
 _atom_site_occupancy 
 _atom_site_symmetry_multiplicity 
 _atom_site_calc_flag 
 _atom_site_refinement_flags 
 _atom_site_disorder_assembly 
 _atom_site_disorder_group 
Ir Ir 0.019282(15) 0.317857(14) 0.281774(11) 0.01244(5) Uani 1 1 d . . . 
P2 P -0.10329(9) 0.32092(9) 0.13103(7) 0.0146(2) Uani 1 1 d . . . 
C11 C 0.2799(3) 0.2459(3) 0.2693(3) 0.0139(8) Uani 1 1 d . . . 
C31 C 0.2212(3) 0.4211(3) 0.2346(3) 0.0133(8) Uani 1 1 d . . . 
C12 C 0.2893(4) 0.2489(3) 0.3630(3) 0.0146(8) Uani 1 1 d . . . 
C13 C 0.3913(4) 0.2127(3) 0.4184(3) 0.0172(8) Uani 1 1 d . . . 
H13 H 0.3972 0.2150 0.4818 0.021 Uiso 1 1 calc R . . 
C14 C 0.4845(4) 0.1734(3) 0.3859(3) 0.0183(9) Uani 1 1 d . . . 
C15 C 0.4774(4) 0.1777(3) 0.2952(3) 0.0188(9) Uani 1 1 d . . . 
H15 H 0.5418 0.1544 0.2714 0.023 Uiso 1 1 calc R . . 
C16 C 0.3799(4) 0.2147(3) 0.2385(3) 0.0176(8) Uani 1 1 d . . . 
H16 H 0.3802 0.2191 0.1776 0.021 Uiso 1 1 calc R . . 
C17 C 0.5901(4) 0.1307(4) 0.4463(3) 0.0292(10) Uani 1 1 d . . . 
H17A H 0.6753 0.1594 0.4381 0.044 Uiso 1 1 calc R . . 
H17B H 0.5605 0.0423 0.4259 0.044 Uiso 1 1 calc R . . 
H17C H 0.6033 0.1627 0.5144 0.044 Uiso 1 1 calc R . . 
H H -0.056(4) 0.368(3) 0.332(3) 0.026(11) Uiso 1 1 d . . . 
C21 C 0.1022(3) 0.2249(3) 0.1056(3) 0.0143(8) Uani 1 1 d . . . 
C22 C -0.0157(4) 0.2535(3) 0.0588(3) 0.0150(8) Uani 1 1 d . . . 
C23 C -0.0751(4) 0.2109(3) -0.0409(3) 0.0174(8) Uani 1 1 d . . . 
H23 H -0.1507 0.2343 -0.0715 0.021 Uiso 1 1 calc R . . 
C24 C -0.0299(4) 0.1352(3) -0.0989(3) 0.0189(9) Uani 1 1 d . . . 
C25 C 0.0761(4) 0.0986(3) -0.0513(3) 0.0189(9) Uani 1 1 d . . . 
H25 H 0.1052 0.0419 -0.0880 0.023 Uiso 1 1 calc R . . 
C26 C 0.1415(4) 0.1422(3) 0.0485(3) 0.0172(8) Uani 1 1 d . . . 
H26 H 0.2144 0.1152 0.0784 0.021 Uiso 1 1 calc R . . 
C27 C -0.0989(4) 0.0897(4) -0.2066(3) 0.0264(10) Uani 1 1 d . . . 
H27A H -0.0870 0.1574 -0.2322 0.040 Uiso 1 1 calc R . . 
H27B H -0.1954 0.0510 -0.2243 0.040 Uiso 1 1 calc R . . 
H27C H -0.0595 0.0308 -0.2338 0.040 Uiso 1 1 calc R . . 
N N 0.1737(3) 0.2858(3) 0.2101(2) 0.0130(7) Uani 1 1 d . . . 
Cl Cl -0.12709(10) 0.11519(9) 0.25395(7) 0.0226(2) Uani 1 1 d . . . 
P1 P 0.17708(9) 0.30959(9) 0.41510(7) 0.0139(2) Uani 1 1 d . . . 
C37 C 0.3900(4) 0.4392(3) 0.1491(3) 0.0203(9) Uani 1 1 d . . . 
H37A H 0.3296 0.3648 0.0975 0.030 Uiso 1 1 calc R . . 
H37B H 0.4667 0.4218 0.1908 0.030 Uiso 1 1 calc R . . 
H37C H 0.4230 0.4990 0.1209 0.030 Uiso 1 1 calc R . . 
C36 C 0.3147(3) 0.4882(3) 0.2078(3) 0.0142(8) Uani 1 1 d . . . 
C35 C 0.3377(4) 0.6131(3) 0.2405(3) 0.0185(9) Uani 1 1 d . . . 
H35 H 0.3981 0.6643 0.2227 0.022 Uiso 1 1 calc R . . 
C34 C 0.2751(4) 0.6646(3) 0.2979(3) 0.0203(9) Uani 1 1 d . . . 
H34 H 0.2961 0.7500 0.3206 0.024 Uiso 1 1 calc R . . 
C33 C 0.1826(4) 0.5932(3) 0.3226(3) 0.0175(8) Uani 1 1 d . . . 
H33 H 0.1409 0.6293 0.3624 0.021 Uiso 1 1 calc R . . 
C32 C 0.1510(4) 0.4675(3) 0.2884(3) 0.0141(8) Uani 1 1 d . . . 
C41 C 0.2889(3) 0.4591(3) 0.5029(3) 0.0150(8) Uani 1 1 d . . . 
H41 H 0.3252 0.5045 0.4645 0.018 Uiso 1 1 calc R . . 
O6 O 0.5218(3) 0.7766(3) 0.1320(2) 0.0363(8) Uani 1 1 d . . . 
C42 C 0.1406(4) 0.2171(3) 0.4910(3) 0.0163(8) Uani 1 1 d . . . 
H42 H 0.2213 0.2464 0.5527 0.020 Uiso 1 1 calc R . . 
C43 C 0.2087(4) 0.5322(4) 0.5436(3) 0.0244(10) Uani 1 1 d . . . 
H43A H 0.1242 0.5224 0.4917 0.037 Uiso 1 1 calc R . . 
H43B H 0.2621 0.6177 0.5713 0.037 Uiso 1 1 calc R . . 
H43C H 0.1885 0.5033 0.5939 0.037 Uiso 1 1 calc R . . 
C44 C 0.4125(4) 0.4607(4) 0.5846(3) 0.0226(9) Uani 1 1 d . . . 
H44A H 0.4643 0.4154 0.5575 0.034 Uiso 1 1 calc R . . 
H44B H 0.3832 0.4233 0.6282 0.034 Uiso 1 1 calc R . . 
H44C H 0.4691 0.5443 0.6206 0.034 Uiso 1 1 calc R . . 
C45 C 0.0214(4) 0.2397(4) 0.5166(3) 0.0259(10) Uani 1 1 d . . . 
H45A H -0.0604 0.2097 0.4578 0.039 Uiso 1 1 calc R . . 
H45B H 0.0403 0.3265 0.5464 0.039 Uiso 1 1 calc R . . 
H45C H 0.0078 0.1972 0.5620 0.039 Uiso 1 1 calc R . . 
C46 C 0.1146(4) 0.0811(3) 0.4477(3) 0.0222(9) Uani 1 1 d . . . 
H46A H 0.0312 0.0478 0.3900 0.033 Uiso 1 1 calc R . . 
H46B H 0.1056 0.0410 0.4953 0.033 Uiso 1 1 calc R . . 
H46C H 0.1902 0.0676 0.4300 0.033 Uiso 1 1 calc R . . 
C51 C -0.0922(4) 0.4725(3) 0.1163(3) 0.0183(9) Uani 1 1 d . . . 
H51 H 0.0060 0.5145 0.1360 0.022 Uiso 1 1 calc R . . 
C52 C -0.2844(4) 0.2316(3) 0.0626(3) 0.0186(9) Uani 1 1 d . . . 
H52 H -0.3184 0.2612 0.0066 0.022 Uiso 1 1 calc R . . 
C53 C -0.1394(4) 0.5489(4) 0.1865(3) 0.0291(10) Uani 1 1 d . . . 
H53A H -0.1059 0.6342 0.1923 0.044 Uiso 1 1 calc R . . 
H53B H -0.1041 0.5383 0.2499 0.044 Uiso 1 1 calc R . . 
H53C H -0.2382 0.5230 0.1619 0.044 Uiso 1 1 calc R . . 
C54 C -0.1598(4) 0.4740(4) 0.0144(3) 0.0292(10) Uani 1 1 d . . . 
H54A H -0.1223 0.4309 -0.0282 0.044 Uiso 1 1 calc R . . 
H54B H -0.1435 0.5578 0.0141 0.044 Uiso 1 1 calc R . . 
H54C H -0.2571 0.4344 -0.0086 0.044 Uiso 1 1 calc R . . 
C55 C -0.3632(4) 0.2591(4) 0.1272(3) 0.0348(11) Uani 1 1 d . . . 
H55A H -0.4593 0.2149 0.0913 0.052 Uiso 1 1 calc R . . 
H55B H -0.3511 0.3460 0.1476 0.052 Uiso 1 1 calc R . . 
H55C H -0.3299 0.2338 0.1842 0.052 Uiso 1 1 calc R . . 
C56 C -0.3141(4) 0.0952(3) 0.0222(3) 0.0246(10) Uani 1 1 d . . . 
H56A H -0.4108 0.0576 -0.0160 0.037 Uiso 1 1 calc R . . 
H56B H -0.2876 0.0624 0.0757 0.037 Uiso 1 1 calc R . . 
H56C H -0.2630 0.0781 -0.0188 0.037 Uiso 1 1 calc R . . 
C61 C 0.5493(4) 0.8823(4) 0.2091(3) 0.0348(11) Uani 1 1 d . . . 
H61A H 0.4677 0.8839 0.2240 0.042 Uiso 1 1 calc R . . 
H61B H 0.5799 0.9558 0.1925 0.042 Uiso 1 1 calc R . . 
C62 C 0.6600(4) 0.8752(4) 0.2943(3) 0.0312(11) Uani 1 1 d . . . 
H62A H 0.6219 0.8403 0.3363 0.037 Uiso 1 1 calc R . . 
H62B H 0.7254 0.9561 0.3332 0.037 Uiso 1 1 calc R . . 
C63 C 0.7267(5) 0.7923(4) 0.2470(3) 0.0385(12) Uani 1 1 d . . . 
H63A H 0.8233 0.8346 0.2647 0.046 Uiso 1 1 calc R . . 
H63B H 0.7190 0.7188 0.2669 0.046 Uiso 1 1 calc R . . 
C64 C 0.6494(4) 0.7607(4) 0.1399(3) 0.0379(12) Uani 1 1 d . . . 
H64A H 0.6964 0.8149 0.1125 0.046 Uiso 1 1 calc R . . 
H64B H 0.6389 0.6761 0.1056 0.046 Uiso 1 1 calc R . . 
 
loop_ 
 _atom_site_aniso_label 
 _atom_site_aniso_U_11 
 _atom_site_aniso_U_22 
 _atom_site_aniso_U_33 
 _atom_site_aniso_U_23 
 _atom_site_aniso_U_13 
 _atom_site_aniso_U_12 
Ir 0.01226(8) 0.01558(8) 0.01151(8) 0.00472(6) 0.00618(6) 0.00523(5) 
P2 0.0137(5) 0.0182(5) 0.0145(5) 0.0059(4) 0.0069(4) 0.0069(4) 
C11 0.0132(19) 0.013(2) 0.019(2) 0.0083(16) 0.0065(16) 0.0058(15) 
C31 0.0102(18) 0.015(2) 0.0133(19) 0.0062(16) 0.0005(15) 0.0041(15) 
C12 0.015(2) 0.014(2) 0.018(2) 0.0062(17) 0.0092(17) 0.0054(16) 
C13 0.020(2) 0.017(2) 0.013(2) 0.0036(17) 0.0068(17) 0.0055(17) 
C14 0.016(2) 0.017(2) 0.020(2) 0.0048(17) 0.0054(17) 0.0056(16) 
C15 0.016(2) 0.023(2) 0.022(2) 0.0076(18) 0.0107(17) 0.0113(17) 
C16 0.023(2) 0.018(2) 0.016(2) 0.0071(17) 0.0095(17) 0.0066(17) 
C17 0.030(2) 0.040(3) 0.025(2) 0.014(2) 0.010(2) 0.022(2) 
C21 0.0129(19) 0.016(2) 0.015(2) 0.0059(16) 0.0081(16) 0.0024(16) 
C22 0.018(2) 0.011(2) 0.014(2) 0.0032(16) 0.0075(16) 0.0005(16) 
C23 0.018(2) 0.020(2) 0.016(2) 0.0095(17) 0.0066(17) 0.0063(17) 
C24 0.020(2) 0.020(2) 0.015(2) 0.0038(17) 0.0082(17) 0.0035(17) 
C25 0.021(2) 0.017(2) 0.018(2) 0.0009(17) 0.0121(17) 0.0024(17) 
C26 0.017(2) 0.017(2) 0.021(2) 0.0090(17) 0.0087(17) 0.0077(16) 
C27 0.027(2) 0.029(3) 0.018(2) 0.0017(19) 0.0080(19) 0.0052(19) 
N 0.0117(16) 0.0168(17) 0.0112(16) 0.0052(14) 0.0044(13) 0.0048(13) 
Cl 0.0219(5) 0.0214(6) 0.0196(5) 0.0080(4) 0.0050(4) -0.0003(4) 
P1 0.0145(5) 0.0173(5) 0.0133(5) 0.0064(4) 0.0076(4) 0.0062(4) 
C37 0.019(2) 0.026(2) 0.023(2) 0.0143(19) 0.0116(18) 0.0071(17) 
C36 0.0111(19) 0.019(2) 0.0108(19) 0.0072(16) 0.0003(15) 0.0037(16) 
C35 0.017(2) 0.018(2) 0.017(2) 0.0090(17) 0.0024(17) 0.0008(16) 
C34 0.023(2) 0.013(2) 0.019(2) 0.0039(17) 0.0025(18) 0.0017(17) 
C33 0.018(2) 0.019(2) 0.017(2) 0.0069(17) 0.0066(17) 0.0069(17) 
C32 0.015(2) 0.021(2) 0.0092(19) 0.0093(17) 0.0030(16) 0.0088(16) 
C41 0.0131(19) 0.015(2) 0.014(2) 0.0036(16) 0.0041(16) 0.0025(16) 
O6 0.0276(18) 0.039(2) 0.0387(19) 0.0179(16) 0.0035(15) 0.0102(15) 
C42 0.018(2) 0.019(2) 0.0102(19) 0.0055(17) 0.0039(16) 0.0050(17) 
C43 0.019(2) 0.023(2) 0.024(2) -0.0031(19) 0.0075(18) 0.0064(18) 
C44 0.020(2) 0.025(2) 0.016(2) 0.0034(18) 0.0017(17) 0.0040(18) 
C45 0.030(2) 0.032(3) 0.024(2) 0.011(2) 0.019(2) 0.010(2) 
C46 0.023(2) 0.025(2) 0.019(2) 0.0111(19) 0.0058(18) 0.0074(18) 
C51 0.021(2) 0.019(2) 0.019(2) 0.0097(18) 0.0084(17) 0.0100(17) 
C52 0.014(2) 0.025(2) 0.020(2) 0.0097(18) 0.0069(17) 0.0080(17) 
C53 0.038(3) 0.024(2) 0.031(3) 0.009(2) 0.015(2) 0.016(2) 
C54 0.032(3) 0.027(3) 0.026(2) 0.015(2) 0.004(2) 0.007(2) 
C55 0.022(2) 0.043(3) 0.043(3) 0.008(2) 0.020(2) 0.010(2) 
C56 0.017(2) 0.025(2) 0.025(2) 0.0058(19) 0.0048(18) -0.0011(18) 
C61 0.028(3) 0.029(3) 0.049(3) 0.018(2) 0.012(2) 0.009(2) 
C62 0.029(3) 0.025(3) 0.036(3) 0.009(2) 0.010(2) 0.007(2) 
C63 0.035(3) 0.039(3) 0.038(3) 0.007(2) 0.009(2) 0.019(2) 
C64 0.036(3) 0.045(3) 0.040(3) 0.018(2) 0.019(2) 0.015(2) 
 
_geom_special_details 
; 
 All esds (except the esd in the dihedral angle between two l.s. planes) 
 are estimated using the full covariance matrix.  The cell esds are taken 
 into account individually in the estimation of esds in distances, angles 
 and torsion angles; correlations between esds in cell parameters are only 
 used when they are defined by crystal symmetry.  An approximate (isotropic) 
 treatment of cell esds is used for estimating esds involving l.s. planes. 
; 
 
loop_ 
 _geom_bond_atom_site_label_1 
 _geom_bond_atom_site_label_2 
 _geom_bond_distance 
 _geom_bond_site_symmetry_2 
 _geom_bond_publ_flag 
Ir C32 2.005(4) . ? 
Ir P1 2.2730(10) . ? 
Ir P2 2.3028(10) . ? 
Ir N 2.334(3) . ? 
Ir Cl 2.4637(10) . ? 
Ir H 1.42(4) . ? 
P2 C22 1.837(4) . ? 
P2 C51 1.859(4) . ? 
P2 C52 1.863(4) . ? 
C11 C12 1.403(5) . ? 
C11 C16 1.404(5) . ? 
C11 N 1.478(4) . ? 
C31 C36 1.387(5) . ? 
C31 C32 1.394(5) . ? 
C31 N 1.507(4) . ? 
C12 C13 1.394(5) . ? 
C12 P1 1.841(4) . ? 
C13 C14 1.385(5) . ? 
C13 H13 0.9500 . ? 
C14 C15 1.385(5) . ? 
C14 C17 1.504(5) . ? 
C15 C16 1.377(5) . ? 
C15 H15 0.9500 . ? 
C16 H16 0.9500 . ? 
C17 H17A 0.9800 . ? 
C17 H17B 0.9800 . ? 
C17 H17C 0.9800 . ? 
C21 C26 1.395(5) . ? 
C21 C22 1.424(5) . ? 
C21 N 1.470(4) . ? 
C22 C23 1.383(5) . ? 
C23 C24 1.395(5) . ? 
C23 H23 0.9500 . ? 
C24 C25 1.382(5) . ? 
C24 C27 1.497(5) . ? 
C25 C26 1.390(5) . ? 
C25 H25 0.9500 . ? 
C26 H26 0.9500 . ? 
C27 H27A 0.9800 . ? 
C27 H27B 0.9800 . ? 
C27 H27C 0.9800 . ? 
P1 C42 1.853(4) . ? 
P1 C41 1.858(4) . ? 
C37 C36 1.502(5) . ? 
C37 H37A 0.9800 . ? 
C37 H37B 0.9800 . ? 
C37 H37C 0.9800 . ? 
C36 C35 1.400(5) . ? 
C35 C34 1.389(5) . ? 
C35 H35 0.9500 . ? 
C34 C33 1.385(5) . ? 
C34 H34 0.9500 . ? 
C33 C32 1.399(5) . ? 
C33 H33 0.9500 . ? 
C41 C44 1.528(5) . ? 
C41 C43 1.528(5) . ? 
C41 H41 1.0000 . ? 
O6 C61 1.421(5) . ? 
O6 C64 1.422(5) . ? 
C42 C45 1.532(5) . ? 
C42 C46 1.534(5) . ? 
C42 H42 1.0000 . ? 
C43 H43A 0.9800 . ? 
C43 H43B 0.9800 . ? 
C43 H43C 0.9800 . ? 
C44 H44A 0.9800 . ? 
C44 H44B 0.9800 . ? 
C44 H44C 0.9800 . ? 
C45 H45A 0.9800 . ? 
C45 H45B 0.9800 . ? 
C45 H45C 0.9800 . ? 
C46 H46A 0.9800 . ? 
C46 H46B 0.9800 . ? 
C46 H46C 0.9800 . ? 
C51 C54 1.517(5) . ? 
C51 C53 1.533(5) . ? 
C51 H51 1.0000 . ? 
C52 C56 1.527(5) . ? 
C52 C55 1.529(5) . ? 
C52 H52 1.0000 . ? 
C53 H53A 0.9800 . ? 
C53 H53B 0.9800 . ? 
C53 H53C 0.9800 . ? 
C54 H54A 0.9800 . ? 
C54 H54B 0.9800 . ? 
C54 H54C 0.9800 . ? 
C55 H55A 0.9800 . ? 
C55 H55B 0.9800 . ? 
C55 H55C 0.9800 . ? 
C56 H56A 0.9800 . ? 
C56 H56B 0.9800 . ? 
C56 H56C 0.9800 . ? 
C61 C62 1.518(6) . ? 
C61 H61A 0.9900 . ? 
C61 H61B 0.9900 . ? 
C62 C63 1.531(6) . ? 
C62 H62A 0.9900 . ? 
C62 H62B 0.9900 . ? 
C63 C64 1.511(6) . ? 
C63 H63A 0.9900 . ? 
C63 H63B 0.9900 . ? 
C64 H64A 0.9900 . ? 
C64 H64B 0.9900 . ? 
 
loop_ 
 _geom_angle_atom_site_label_1 
 _geom_angle_atom_site_label_2 
 _geom_angle_atom_site_label_3 
 _geom_angle 
 _geom_angle_site_symmetry_1 
 _geom_angle_site_symmetry_3 
 _geom_angle_publ_flag 
C32 Ir P1 88.84(10) . . ? 
C32 Ir P2 84.81(10) . . ? 
P1 Ir P2 166.49(3) . . ? 
C32 Ir N 64.48(12) . . ? 
P1 Ir N 84.05(7) . . ? 
P2 Ir N 82.46(7) . . ? 
C32 Ir Cl 169.92(10) . . ? 
P1 Ir Cl 91.82(3) . . ? 
P2 Ir Cl 92.38(3) . . ? 
N Ir Cl 105.58(8) . . ? 
C32 Ir H 101.2(15) . . ? 
P1 Ir H 95.3(14) . . ? 
P2 Ir H 97.6(14) . . ? 
N Ir H 165.6(15) . . ? 
Cl Ir H 88.8(15) . . ? 
C22 P2 C51 105.44(16) . . ? 
C22 P2 C52 104.03(17) . . ? 
C51 P2 C52 104.43(17) . . ? 
C22 P2 Ir 101.26(12) . . ? 
C51 P2 Ir 116.35(13) . . ? 
C52 P2 Ir 123.27(13) . . ? 
C12 C11 C16 118.1(3) . . ? 
C12 C11 N 119.4(3) . . ? 
C16 C11 N 122.3(3) . . ? 
C36 C31 C32 125.8(3) . . ? 
C36 C31 N 127.3(3) . . ? 
C32 C31 N 106.9(3) . . ? 
C13 C12 C11 118.6(3) . . ? 
C13 C12 P1 120.5(3) . . ? 
C11 C12 P1 120.7(3) . . ? 
C14 C13 C12 123.6(4) . . ? 
C14 C13 H13 118.2 . . ? 
C12 C13 H13 118.2 . . ? 
C15 C14 C13 116.5(3) . . ? 
C15 C14 C17 121.4(3) . . ? 
C13 C14 C17 122.1(4) . . ? 
C16 C15 C14 121.9(3) . . ? 
C16 C15 H15 119.0 . . ? 
C14 C15 H15 119.0 . . ? 
C15 C16 C11 121.0(3) . . ? 
C15 C16 H16 119.5 . . ? 
C11 C16 H16 119.5 . . ? 
C14 C17 H17A 109.5 . . ? 
C14 C17 H17B 109.5 . . ? 
H17A C17 H17B 109.5 . . ? 
C14 C17 H17C 109.5 . . ? 
H17A C17 H17C 109.5 . . ? 
H17B C17 H17C 109.5 . . ? 
C26 C21 C22 117.3(3) . . ? 
C26 C21 N 125.2(3) . . ? 
C22 C21 N 117.5(3) . . ? 
C23 C22 C21 119.0(3) . . ? 
C23 C22 P2 120.7(3) . . ? 
C21 C22 P2 119.2(3) . . ? 
C22 C23 C24 123.5(4) . . ? 
C22 C23 H23 118.2 . . ? 
C24 C23 H23 118.2 . . ? 
C25 C24 C23 116.3(3) . . ? 
C25 C24 C27 121.9(3) . . ? 
C23 C24 C27 121.6(4) . . ? 
C24 C25 C26 122.0(3) . . ? 
C24 C25 H25 119.0 . . ? 
C26 C25 H25 119.0 . . ? 
C25 C26 C21 121.3(3) . . ? 
C25 C26 H26 119.4 . . ? 
C21 C26 H26 119.4 . . ? 
C24 C27 H27A 109.5 . . ? 
C24 C27 H27B 109.5 . . ? 
H27A C27 H27B 109.5 . . ? 
C24 C27 H27C 109.5 . . ? 
H27A C27 H27C 109.5 . . ? 
H27B C27 H27C 109.5 . . ? 
C21 N C11 121.9(3) . . ? 
C21 N C31 112.0(3) . . ? 
C11 N C31 109.6(3) . . ? 
C21 N Ir 109.9(2) . . ? 
C11 N Ir 111.9(2) . . ? 
C31 N Ir 85.61(18) . . ? 
C12 P1 C42 106.10(16) . . ? 
C12 P1 C41 103.57(16) . . ? 
C42 P1 C41 104.53(17) . . ? 
C12 P1 Ir 101.26(12) . . ? 
C42 P1 Ir 124.43(12) . . ? 
C41 P1 Ir 114.72(12) . . ? 
C36 C37 H37A 109.5 . . ? 
C36 C37 H37B 109.5 . . ? 
H37A C37 H37B 109.5 . . ? 
C36 C37 H37C 109.5 . . ? 
H37A C37 H37C 109.5 . . ? 
H37B C37 H37C 109.5 . . ? 
C31 C36 C35 114.4(3) . . ? 
C31 C36 C37 126.3(3) . . ? 
C35 C36 C37 119.3(3) . . ? 
C34 C35 C36 122.2(3) . . ? 
C34 C35 H35 118.9 . . ? 
C36 C35 H35 118.9 . . ? 
C33 C34 C35 120.9(4) . . ? 
C33 C34 H34 119.6 . . ? 
C35 C34 H34 119.6 . . ? 
C34 C33 C32 119.4(3) . . ? 
C34 C33 H33 120.3 . . ? 
C32 C33 H33 120.3 . . ? 
C31 C32 C33 117.1(3) . . ? 
C31 C32 Ir 102.6(3) . . ? 
C33 C32 Ir 140.1(3) . . ? 
C44 C41 C43 110.2(3) . . ? 
C44 C41 P1 117.4(3) . . ? 
C43 C41 P1 111.4(2) . . ? 
C44 C41 H41 105.6 . . ? 
C43 C41 H41 105.6 . . ? 
P1 C41 H41 105.6 . . ? 
C61 O6 C64 105.6(3) . . ? 
C45 C42 C46 110.0(3) . . ? 
C45 C42 P1 109.4(3) . . ? 
C46 C42 P1 115.3(2) . . ? 
C45 C42 H42 107.2 . . ? 
C46 C42 H42 107.2 . . ? 
P1 C42 H42 107.2 . . ? 
C41 C43 H43A 109.5 . . ? 
C41 C43 H43B 109.5 . . ? 
H43A C43 H43B 109.5 . . ? 
C41 C43 H43C 109.5 . . ? 
H43A C43 H43C 109.5 . . ? 
H43B C43 H43C 109.5 . . ? 
C41 C44 H44A 109.5 . . ? 
C41 C44 H44B 109.5 . . ? 
H44A C44 H44B 109.5 . . ? 
C41 C44 H44C 109.5 . . ? 
H44A C44 H44C 109.5 . . ? 
H44B C44 H44C 109.5 . . ? 
C42 C45 H45A 109.5 . . ? 
C42 C45 H45B 109.5 . . ? 
H45A C45 H45B 109.5 . . ? 
C42 C45 H45C 109.5 . . ? 
H45A C45 H45C 109.5 . . ? 
H45B C45 H45C 109.5 . . ? 
C42 C46 H46A 109.5 . . ? 
C42 C46 H46B 109.5 . . ? 
H46A C46 H46B 109.5 . . ? 
C42 C46 H46C 109.5 . . ? 
H46A C46 H46C 109.5 . . ? 
H46B C46 H46C 109.5 . . ? 
C54 C51 C53 110.7(3) . . ? 
C54 C51 P2 116.1(3) . . ? 
C53 C51 P2 111.5(3) . . ? 
C54 C51 H51 105.9 . . ? 
C53 C51 H51 105.9 . . ? 
P2 C51 H51 105.9 . . ? 
C56 C52 C55 109.8(3) . . ? 
C56 C52 P2 116.0(3) . . ? 
C55 C52 P2 108.6(3) . . ? 
C56 C52 H52 107.4 . . ? 
C55 C52 H52 107.4 . . ? 
P2 C52 H52 107.4 . . ? 
C51 C53 H53A 109.5 . . ? 
C51 C53 H53B 109.5 . . ? 
H53A C53 H53B 109.5 . . ? 
C51 C53 H53C 109.5 . . ? 
H53A C53 H53C 109.5 . . ? 
H53B C53 H53C 109.5 . . ? 
C51 C54 H54A 109.5 . . ? 
C51 C54 H54B 109.5 . . ? 
H54A C54 H54B 109.5 . . ? 
C51 C54 H54C 109.5 . . ? 
H54A C54 H54C 109.5 . . ? 
H54B C54 H54C 109.5 . . ? 
C52 C55 H55A 109.5 . . ? 
C52 C55 H55B 109.5 . . ? 
H55A C55 H55B 109.5 . . ? 
C52 C55 H55C 109.5 . . ? 
H55A C55 H55C 109.5 . . ? 
H55B C55 H55C 109.5 . . ? 
C52 C56 H56A 109.5 . . ? 
C52 C56 H56B 109.5 . . ? 
H56A C56 H56B 109.5 . . ? 
C52 C56 H56C 109.5 . . ? 
H56A C56 H56C 109.5 . . ? 
H56B C56 H56C 109.5 . . ? 
O6 C61 C62 105.2(3) . . ? 
O6 C61 H61A 110.7 . . ? 
C62 C61 H61A 110.7 . . ? 
O6 C61 H61B 110.7 . . ? 
C62 C61 H61B 110.7 . . ? 
H61A C61 H61B 108.8 . . ? 
C61 C62 C63 103.6(4) . . ? 
C61 C62 H62A 111.0 . . ? 
C63 C62 H62A 111.0 . . ? 
C61 C62 H62B 111.0 . . ? 
C63 C62 H62B 111.0 . . ? 
H62A C62 H62B 109.0 . . ? 
C64 C63 C62 104.4(4) . . ? 
C64 C63 H63A 110.9 . . ? 
C62 C63 H63A 110.9 . . ? 
C64 C63 H63B 110.9 . . ? 
C62 C63 H63B 110.9 . . ? 
H63A C63 H63B 108.9 . . ? 
O6 C64 C63 104.8(3) . . ? 
O6 C64 H64A 110.8 . . ? 
C63 C64 H64A 110.8 . . ? 
O6 C64 H64B 110.8 . . ? 
C63 C64 H64B 110.8 . . ? 
H64A C64 H64B 108.9 . . ? 
 
_diffrn_measured_fraction_theta_max    0.996 
_diffrn_reflns_theta_full              25.00 
_diffrn_measured_fraction_theta_full   1.000 
_refine_diff_density_max    1.045 
_refine_diff_density_min   -0.870 
_refine_diff_density_rms    0.123
_iucr_refine_instructions_details
;
TITL SV350 in P-1
CELL 0.71073  10.94400  11.94790  15.36180 103.3016 107.9995 102.2239
ZERR    2.00   0.00120   0.00130   0.00170   0.0019   0.0018   0.0019
LATT  1
SFAC C H N P CL IR O
UNIT 74 110 2 4 2 2 2
LIST 6 ! automatically inserted. Change 6 to 4 for CHECKCIF!!
TEMP -153.180
Size 0.022 0.021 0.021
Bond $H
 
L.S. 4
BOND
FMAP 2
PLAN 20
Acta 50
 
WGHT    0.020500
FVAR       0.11603
IR    6    0.019282    0.317857    0.281774    11.00000    0.01226    0.01558 =
         0.01151    0.00472    0.00618    0.00523
P2    4   -0.103286    0.320918    0.131031    11.00000    0.01369    0.01822 =
         0.01453    0.00593    0.00689    0.00686
C11   1    0.279917    0.245892    0.269291    11.00000    0.01316    0.01293 =
         0.01868    0.00831    0.00649    0.00582
C31   1    0.221227    0.421118    0.234571    11.00000    0.01023    0.01454 =
         0.01331    0.00618    0.00052    0.00405
C12   1    0.289289    0.248928    0.363008    11.00000    0.01537    0.01386 =
         0.01797    0.00619    0.00919    0.00544
C13   1    0.391284    0.212676    0.418377    11.00000    0.02045    0.01721 =
         0.01347    0.00361    0.00684    0.00554
AFIX  43
H13   2    0.397160    0.215026    0.481814    11.00000   -1.20000
AFIX   0
C14   1    0.484485    0.173431    0.385915    11.00000    0.01649    0.01696 =
         0.02005    0.00482    0.00537    0.00560
C15   1    0.477438    0.177661    0.295219    11.00000    0.01640    0.02323 =
         0.02229    0.00757    0.01071    0.01133
AFIX  43
H15   2    0.541785    0.154358    0.271413    11.00000   -1.20000
AFIX   0
C16   1    0.379885    0.214656    0.238527    11.00000    0.02254    0.01771 =
         0.01559    0.00711    0.00954    0.00659
AFIX  43
H16   2    0.380234    0.219112    0.177648    11.00000   -1.20000
AFIX   0
C17   1    0.590087    0.130746    0.446342    11.00000    0.03013    0.03952 =
         0.02541    0.01377    0.01023    0.02217
AFIX 137
H17A  2    0.675266    0.159443    0.438084    11.00000   -1.50000
H17B  2    0.560536    0.042269    0.425884    11.00000   -1.50000
H17C  2    0.603270    0.162713    0.514434    11.00000   -1.50000
AFIX   0
H     2   -0.055682    0.368073    0.331591    11.00000    0.02604
C21   1    0.102216    0.224855    0.105648    11.00000    0.01286    0.01615 =
         0.01544    0.00591    0.00809    0.00245
C22   1   -0.015702    0.253519    0.058756    11.00000    0.01802    0.01130 =
         0.01421    0.00324    0.00747    0.00047
C23   1   -0.075082    0.210858   -0.040896    11.00000    0.01793    0.02016 =
         0.01640    0.00946    0.00663    0.00628
AFIX  43
H23   2   -0.150687    0.234309   -0.071496    11.00000   -1.20000
AFIX   0
C24   1   -0.029932    0.135230   -0.098916    11.00000    0.02026    0.02017 =
         0.01506    0.00382    0.00822    0.00345
C25   1    0.076111    0.098595   -0.051337    11.00000    0.02096    0.01691 =
         0.01805    0.00093    0.01209    0.00237
AFIX  43
H25   2    0.105151    0.041925   -0.087971    11.00000   -1.20000
AFIX   0
C26   1    0.141522    0.142187    0.048498    11.00000    0.01724    0.01748 =
         0.02095    0.00897    0.00872    0.00772
AFIX  43
H26   2    0.214414    0.115156    0.078392    11.00000   -1.20000
AFIX   0
C27   1   -0.098900    0.089677   -0.206588    11.00000    0.02669    0.02946 =
         0.01781    0.00168    0.00796    0.00519
AFIX 137
H27A  2   -0.086985    0.157450   -0.232164    11.00000   -1.50000
H27B  2   -0.195363    0.050973   -0.224261    11.00000   -1.50000
H27C  2   -0.059493    0.030794   -0.233810    11.00000   -1.50000
AFIX   0
N     3    0.173709    0.285750    0.210060    11.00000    0.01171    0.01680 =
         0.01124    0.00525    0.00438    0.00482
CL    5   -0.127087    0.115193    0.253952    11.00000    0.02191    0.02138 =
         0.01964    0.00804    0.00504   -0.00032
P1    4    0.177085    0.309591    0.415101    11.00000    0.01449    0.01727 =
         0.01327    0.00639    0.00760    0.00618
C37   1    0.390038    0.439203    0.149138    11.00000    0.01865    0.02564 =
         0.02331    0.01431    0.01161    0.00714
AFIX 137
H37A  2    0.329590    0.364752    0.097462    11.00000   -1.50000
H37B  2    0.466734    0.421841    0.190831    11.00000   -1.50000
H37C  2    0.422958    0.499040    0.120850    11.00000   -1.50000
AFIX   0
C36   1    0.314701    0.488195    0.207778    11.00000    0.01108    0.01873 =
         0.01079    0.00718    0.00030    0.00373
C35   1    0.337658    0.613052    0.240462    11.00000    0.01721    0.01793 =
         0.01692    0.00902    0.00242    0.00079
AFIX  43
H35   2    0.398079    0.664271    0.222736    11.00000   -1.20000
AFIX   0
C34   1    0.275117    0.664608    0.297920    11.00000    0.02258    0.01300 =
         0.01875    0.00386    0.00250    0.00174
AFIX  43
H34   2    0.296097    0.749985    0.320587    11.00000   -1.20000
AFIX   0
C33   1    0.182591    0.593218    0.322608    11.00000    0.01771    0.01917 =
         0.01695    0.00689    0.00656    0.00690
AFIX  43
H33   2    0.140897    0.629302    0.362417    11.00000   -1.20000
AFIX   0
C32   1    0.151048    0.467494    0.288414    11.00000    0.01490    0.02108 =
         0.00919    0.00930    0.00297    0.00882
C41   1    0.288902    0.459090    0.502878    11.00000    0.01308    0.01524 =
         0.01424    0.00357    0.00411    0.00253
AFIX  13
H41   2    0.325189    0.504498    0.464510    11.00000   -1.20000
AFIX   0
O6    7    0.521761    0.776637    0.132017    11.00000    0.02758    0.03889 =
         0.03867    0.01785    0.00345    0.01020
C42   1    0.140621    0.217105    0.491007    11.00000    0.01830    0.01932 =
         0.01019    0.00546    0.00386    0.00500
AFIX  13
H42   2    0.221271    0.246427    0.552741    11.00000   -1.20000
AFIX   0
C43   1    0.208736    0.532190    0.543585    11.00000    0.01937    0.02310 =
         0.02434   -0.00305    0.00752    0.00637
AFIX 137
H43A  2    0.124226    0.522381    0.491670    11.00000   -1.50000
H43B  2    0.262067    0.617748    0.571328    11.00000   -1.50000
H43C  2    0.188510    0.503313    0.593859    11.00000   -1.50000
AFIX   0
C44   1    0.412480    0.460650    0.584628    11.00000    0.01982    0.02524 =
         0.01591    0.00344    0.00168    0.00402
AFIX 137
H44A  2    0.464342    0.415379    0.557531    11.00000   -1.50000
H44B  2    0.383202    0.423263    0.628224    11.00000   -1.50000
H44C  2    0.469142    0.544310    0.620552    11.00000   -1.50000
AFIX   0
C45   1    0.021357    0.239666    0.516588    11.00000    0.02993    0.03188 =
         0.02422    0.01085    0.01949    0.00961
AFIX 137
H45A  2   -0.060353    0.209742    0.457775    11.00000   -1.50000
H45B  2    0.040325    0.326496    0.546375    11.00000   -1.50000
H45C  2    0.007823    0.197190    0.561973    11.00000   -1.50000
AFIX   0
C46   1    0.114555    0.081093    0.447665    11.00000    0.02314    0.02478 =
         0.01933    0.01111    0.00580    0.00738
AFIX 137
H46A  2    0.031178    0.047767    0.389985    11.00000   -1.50000
H46B  2    0.105595    0.040994    0.495300    11.00000   -1.50000
H46C  2    0.190241    0.067642    0.430026    11.00000   -1.50000
AFIX   0
C51   1   -0.092234    0.472478    0.116310    11.00000    0.02063    0.01937 =
         0.01943    0.00975    0.00839    0.00999
AFIX  13
H51   2    0.006004    0.514517    0.136022    11.00000   -1.20000
AFIX   0
C52   1   -0.284362    0.231619    0.062554    11.00000    0.01415    0.02491 =
         0.01961    0.00973    0.00693    0.00804
AFIX  13
H52   2   -0.318401    0.261198    0.006606    11.00000   -1.20000
AFIX   0
C53   1   -0.139355    0.548902    0.186461    11.00000    0.03764    0.02352 =
         0.03148    0.00936    0.01500    0.01650
AFIX 137
H53A  2   -0.105914    0.634221    0.192349    11.00000   -1.50000
H53B  2   -0.104078    0.538310    0.249926    11.00000   -1.50000
H53C  2   -0.238188    0.523020    0.161945    11.00000   -1.50000
AFIX   0
C54   1   -0.159758    0.474007    0.014377    11.00000    0.03194    0.02710 =
         0.02575    0.01524    0.00359    0.00672
AFIX 137
H54A  2   -0.122349    0.430882   -0.028189    11.00000   -1.50000
H54B  2   -0.143464    0.557762    0.014064    11.00000   -1.50000
H54C  2   -0.257075    0.434363   -0.008583    11.00000   -1.50000
AFIX   0
C55   1   -0.363218    0.259057    0.127221    11.00000    0.02178    0.04274 =
         0.04269    0.00793    0.02017    0.00950
AFIX 137
H55A  2   -0.459261    0.214927    0.091259    11.00000   -1.50000
H55B  2   -0.351056    0.345978    0.147645    11.00000   -1.50000
H55C  2   -0.329869    0.233850    0.184196    11.00000   -1.50000
AFIX   0
C56   1   -0.314112    0.095233    0.022234    11.00000    0.01711    0.02495 =
         0.02450    0.00579    0.00483   -0.00108
AFIX 137
H56A  2   -0.410835    0.057612   -0.016019    11.00000   -1.50000
H56B  2   -0.287639    0.062430    0.075665    11.00000   -1.50000
H56C  2   -0.262957    0.078117   -0.018824    11.00000   -1.50000
AFIX   0
C61   1    0.549270    0.882321    0.209112    11.00000    0.02832    0.02878 =
         0.04854    0.01765    0.01153    0.00947
AFIX  23
H61A  2    0.467726    0.883913    0.223980    11.00000   -1.20000
H61B  2    0.579929    0.955791    0.192467    11.00000   -1.20000
AFIX   0
C62   1    0.660002    0.875224    0.294309    11.00000    0.02942    0.02517 =
         0.03573    0.00883    0.00982    0.00663
AFIX  23
H62A  2    0.621935    0.840327    0.336312    11.00000   -1.20000
H62B  2    0.725411    0.956100    0.333176    11.00000   -1.20000
AFIX   0
C63   1    0.726679    0.792288    0.247004    11.00000    0.03501    0.03921 =
         0.03838    0.00687    0.00890    0.01872
AFIX  23
H63A  2    0.823283    0.834578    0.264664    11.00000   -1.20000
H63B  2    0.719006    0.718779    0.266908    11.00000   -1.20000
AFIX   0
C64   1    0.649420    0.760659    0.139891    11.00000    0.03586    0.04533 =
         0.04023    0.01821    0.01935    0.01484
AFIX  23
H64A  2    0.696424    0.814861    0.112458    11.00000   -1.20000
H64B  2    0.638916    0.676082    0.105623    11.00000   -1.20000
REM #####
REM #####
HKLF 4
 
REM  SV350 in P-1
REM R1 =  0.0306 for   6133 Fo > 4sig(Fo)  and  0.0436 for all   7214 data
REM    403 parameters refined using      0 restraints
 
END  
     
WGHT      0.0205      0.0000 
REM Highest difference peak  1.045,  deepest hole -0.870,  1-sigma level  0.123
Q1    1   0.0992  0.3646  0.2776  11.00000  0.05    1.05
Q2    1  -0.0586  0.2764  0.2844  11.00000  0.05    0.95
Q3    1   0.0026  0.2211  0.2631  11.00000  0.05    0.94
Q4    1  -0.0027  0.2682  0.2138  11.00000  0.05    0.92
Q5    1   0.0383  0.4246  0.2994  11.00000  0.05    0.89
Q6    1   0.0569  0.2663  0.3036  11.00000  0.05    0.87
Q7    1   0.0530  0.3750  0.3502  11.00000  0.05    0.86
Q8    1  -0.0097  0.3791  0.2666  11.00000  0.05    0.85
Q9    1   0.1376  0.2469  0.4407  11.00000  0.05    0.66
Q10   1   0.0287  0.3326  0.2057  11.00000  0.05    0.64
Q11   1  -0.1050  0.3462  0.2658  11.00000  0.05    0.62
Q12   1  -0.0956  0.4010  0.1163  11.00000  0.05    0.59
Q13   1   0.5296  0.1411  0.3997  11.00000  0.05    0.55
Q14   1   0.0705  0.2657  0.3947  11.00000  0.05    0.54
Q15   1   0.0945  0.2845  0.2480  11.00000  0.05    0.53
Q16   1   0.1417  0.3726  0.3184  11.00000  0.05    0.52
Q17   1   0.0045  0.2841  0.3474  11.00000  0.05    0.52
Q18   1   0.5544  0.1031  0.5029  11.00000  0.05    0.51
Q19   1  -0.0223  0.4350  0.2404  11.00000  0.05    0.49
Q20   1   0.1801  0.1622  0.4228  11.00000  0.05    0.49
; 


 
data_sv18_2 
 
_audit_creation_method            SHELXL-97 
_chemical_name_systematic 
; 
 ? 
; 
_chemical_name_common             ? 
_chemical_melting_point           ? 
_chemical_formula_moiety          ? 
_chemical_formula_sum 
 'C40 H55 Cl Ir N P2' 
_chemical_formula_weight          839.44 
 
loop_ 
 _atom_type_symbol 
 _atom_type_description 
 _atom_type_scat_dispersion_real 
 _atom_type_scat_dispersion_imag 
 _atom_type_scat_source 
 'C'  'C'   0.0033   0.0016 
 'International Tables Vol C Tables 4.2.6.8 and 6.1.1.4' 
 'H'  'H'   0.0000   0.0000 
 'International Tables Vol C Tables 4.2.6.8 and 6.1.1.4' 
 'N'  'N'   0.0061   0.0033 
 'International Tables Vol C Tables 4.2.6.8 and 6.1.1.4' 
 'P'  'P'   0.1023   0.0942 
 'International Tables Vol C Tables 4.2.6.8 and 6.1.1.4' 
 'Cl'  'Cl'   0.1484   0.1585 
 'International Tables Vol C Tables 4.2.6.8 and 6.1.1.4' 
 'Ir'  'Ir'  -1.4442   7.9887 
 'International Tables Vol C Tables 4.2.6.8 and 6.1.1.4' 
 
_symmetry_cell_setting            'triclinic' 
_symmetry_space_group_name_H-M    'P -1' 
 
loop_ 
 _symmetry_equiv_pos_as_xyz 
 'x, y, z' 
 '-x, -y, -z' 
 
_cell_length_a                    10.1952(17) 
_cell_length_b                    11.4033(19) 
_cell_length_c                    16.521(3) 
_cell_angle_alpha                 102.990(4) 
_cell_angle_beta                  100.621(4) 
_cell_angle_gamma                 92.946(4) 
_cell_volume                      1830.9(5) 
_cell_formula_units_Z             2 
_cell_measurement_temperature     120(2) 
_cell_measurement_reflns_used     9977 
_cell_measurement_theta_min       4.978 
_cell_measurement_theta_max       52.763 
 
_exptl_crystal_description        'block' 
_exptl_crystal_colour             'yellow' 
_exptl_crystal_size_max           0.18 
_exptl_crystal_size_mid           0.16 
_exptl_crystal_size_min           0.11 
_exptl_crystal_density_meas       ? 
_exptl_crystal_density_diffrn     1.523 
_exptl_crystal_density_method     'not measured' 
_exptl_crystal_F_000              852 
_exptl_absorpt_coefficient_mu     3.836 
_exptl_absorpt_correction_type    'multi-scan' 
_exptl_absorpt_correction_T_min   0.57454 
_exptl_absorpt_correction_T_max   0.5790 
_exptl_absorpt_process_details    'Bruker AXS area detector scaling and absorption correction'  
 
_exptl_special_details 
; 
 ? 
; 
 
_diffrn_ambient_temperature       120(2) 
_diffrn_radiation_wavelength      0.71073 
_diffrn_radiation_type            MoK\a 
_diffrn_radiation_source          'fine-focus sealed tube' 
_diffrn_radiation_monochromator   graphite 
_diffrn_measurement_device_type   'Bruker APEX-II' 
_diffrn_measurement_method        ? 
_diffrn_detector_area_resol_mean  ? 
_diffrn_standards_number          ? 
_diffrn_standards_interval_count  ? 
_diffrn_standards_interval_time   ? 
_diffrn_standards_decay_%         ? 
_diffrn_reflns_number             25647 
_diffrn_reflns_av_R_equivalents   0.0453 
_diffrn_reflns_av_sigmaI/netI     0.0484 
_diffrn_reflns_limit_h_min        -12 
_diffrn_reflns_limit_h_max        12 
_diffrn_reflns_limit_k_min        -14 
_diffrn_reflns_limit_k_max        14 
_diffrn_reflns_limit_l_min        -20 
_diffrn_reflns_limit_l_max        20 
_diffrn_reflns_theta_min          1.29 
_diffrn_reflns_theta_max          26.41 
_reflns_number_total              7470 
_reflns_number_gt                 6759 
_reflns_threshold_expression      >2sigma(I) 
 
_computing_data_collection        ? 
_computing_cell_refinement        ? 
_computing_data_reduction         ? 
_computing_structure_solution     'SHELXS-97 (Sheldrick, 1990)' 
_computing_structure_refinement   'SHELXL-97 (Sheldrick, 1997)' 
_computing_molecular_graphics     ? 
_computing_publication_material   ? 
 
_refine_special_details 
; 
 Refinement of F^2^ against ALL reflections.  The weighted R-factor wR and 
 goodness of fit S are based on F^2^, conventional R-factors R are based 
 on F, with F set to zero for negative F^2^. The threshold expression of 
 F^2^ > 2sigma(F^2^) is used only for calculating R-factors(gt) etc. and is 
 not relevant to the choice of reflections for refinement.  R-factors based 
 on F^2^ are statistically about twice as large as those based on F, and R- 
 factors based on ALL data will be even larger. 
; 
 
_refine_ls_structure_factor_coef  Fsqd  
_refine_ls_matrix_type            full 
_refine_ls_weighting_scheme       calc  
_refine_ls_weighting_details 
 'calc w=1/[\s^2^(Fo^2^)+(0.0168P)^2^+3.1500P] where P=(Fo^2^+2Fc^2^)/3' 
_atom_sites_solution_primary      direct 
_atom_sites_solution_secondary    difmap 
_atom_sites_solution_hydrogens    geom 
_refine_ls_hydrogen_treatment     mixed 
_refine_ls_extinction_method      none 
_refine_ls_extinction_coef        ? 
_refine_ls_number_reflns          7470 
_refine_ls_number_parameters      429 
_refine_ls_number_restraints      0 
_refine_ls_R_factor_all           0.0371 
_refine_ls_R_factor_gt            0.0305 
_refine_ls_wR_factor_ref          0.0645 
_refine_ls_wR_factor_gt           0.0608 
_refine_ls_goodness_of_fit_ref    1.075 
_refine_ls_restrained_S_all       1.075 
_refine_ls_shift/su_max           0.002 
_refine_ls_shift/su_mean          0.000 
 
loop_ 
 _atom_site_label 
 _atom_site_type_symbol 
 _atom_site_fract_x 
 _atom_site_fract_y 
 _atom_site_fract_z 
 _atom_site_U_iso_or_equiv 
 _atom_site_adp_type 
 _atom_site_occupancy 
 _atom_site_symmetry_multiplicity 
 _atom_site_calc_flag 
 _atom_site_refinement_flags 
 _atom_site_disorder_assembly 
 _atom_site_disorder_group 
Ir Ir 0.766100(15) 0.782135(14) 0.742404(10) 0.01120(5) Uani 1 1 d . . . 
N N 0.9459(3) 0.6799(3) 0.76639(19) 0.0114(7) Uani 1 1 d . . . 
P2 P 0.76947(10) 0.81308(9) 0.88418(6) 0.0116(2) Uani 1 1 d . . . 
H1A H 0.599(4) 0.596(4) 0.652(3) 0.029(13) Uiso 1 1 d . . . 
C1 C 0.6597(4) 0.6125(4) 0.7108(3) 0.0194(9) Uani 1 1 d . . . 
P1 P 0.82089(10) 0.75508(9) 0.60946(6) 0.0119(2) Uani 1 1 d . . . 
Cl Cl 0.90949(10) 0.97689(9) 0.77586(6) 0.0195(2) Uani 1 1 d . . . 
C11 C 0.8945(4) 0.5500(3) 0.7244(2) 0.0145(8) Uani 1 1 d . . . 
H2A H 0.604(4) 0.609(4) 0.753(3) 0.018(11) Uiso 1 1 d . . . 
C12 C 0.7571(4) 0.5176(4) 0.7065(2) 0.0165(8) Uani 1 1 d . . . 
C13 C 0.7124(4) 0.3949(4) 0.6762(2) 0.0186(9) Uani 1 1 d . . . 
H13 H 0.6191 0.3701 0.6648 0.022 Uiso 1 1 calc R . . 
C14 C 0.8024(4) 0.3082(4) 0.6624(3) 0.0230(10) Uani 1 1 d . . . 
H14 H 0.7707 0.2249 0.6444 0.028 Uiso 1 1 calc R . . 
C15 C 0.9375(4) 0.3434(4) 0.6748(3) 0.0233(10) Uani 1 1 d . . . 
H15 H 0.9983 0.2847 0.6623 0.028 Uiso 1 1 calc R . . 
C16 C 0.9839(4) 0.4640(4) 0.7053(2) 0.0176(9) Uani 1 1 d . . . 
H16 H 1.0768 0.4886 0.7135 0.021 Uiso 1 1 calc R . . 
C36 C 1.1826(4) 0.7433(4) 0.7564(3) 0.0164(9) Uani 1 1 d . . . 
H36 H 1.2141 0.7385 0.8133 0.020 Uiso 1 1 calc R . . 
C21 C 0.9937(4) 0.6905(3) 0.8589(2) 0.0114(8) Uani 1 1 d . . . 
C22 C 0.9307(4) 0.7572(3) 0.9195(2) 0.0113(8) Uani 1 1 d . . . 
C23 C 0.9810(4) 0.7619(4) 1.0055(2) 0.0147(8) Uani 1 1 d . . . 
H23 H 0.9397 0.8094 1.0470 0.018 Uiso 1 1 calc R . . 
C24 C 1.0879(4) 0.7006(3) 1.0324(2) 0.0137(8) Uani 1 1 d . . . 
C25 C 1.1459(4) 0.6318(4) 0.9705(2) 0.0161(8) Uani 1 1 d . . . 
H25 H 1.2192 0.5883 0.9869 0.019 Uiso 1 1 calc R . . 
C27 C 1.1370(4) 0.7039(4) 1.1248(2) 0.0186(9) Uani 1 1 d . . . 
H27A H 1.0863 0.6397 1.1401 0.028 Uiso 1 1 calc R . . 
H27B H 1.1241 0.7826 1.1595 0.028 Uiso 1 1 calc R . . 
H27C H 1.2325 0.6915 1.1347 0.028 Uiso 1 1 calc R . . 
H H 0.620(5) 0.832(4) 0.717(3) 0.044(15) Uiso 1 1 d . . . 
C26 C 1.0996(4) 0.6251(4) 0.8856(2) 0.0146(8) Uani 1 1 d . . . 
H26 H 1.1399 0.5756 0.8446 0.017 Uiso 1 1 calc R . . 
C31 C 1.0473(4) 0.7226(3) 0.7219(2) 0.0122(8) Uani 1 1 d . . . 
C32 C 1.0005(4) 0.7395(3) 0.6403(2) 0.0131(8) Uani 1 1 d . . . 
C33 C 1.0948(4) 0.7631(4) 0.5932(2) 0.0161(8) Uani 1 1 d . . . 
H33 H 1.0639 0.7701 0.5368 0.019 Uiso 1 1 calc R . . 
C35 C 1.2738(4) 0.7713(4) 0.7085(3) 0.0179(9) Uani 1 1 d . . . 
H35 H 1.3665 0.7868 0.7337 0.021 Uiso 1 1 calc R . . 
C34 C 1.2321(4) 0.7769(4) 0.6255(3) 0.0170(9) Uani 1 1 d . . . 
C37 C 1.3310(4) 0.8009(4) 0.5724(3) 0.0260(10) Uani 1 1 d . . . 
H37A H 1.3157 0.7372 0.5198 0.039 Uiso 1 1 calc R . . 
H37B H 1.4224 0.8016 0.6041 0.039 Uiso 1 1 calc R . . 
H37C H 1.3193 0.8795 0.5587 0.039 Uiso 1 1 calc R . . 
C42 C 0.5113(4) 0.7426(4) 0.9070(3) 0.0236(10) Uani 1 1 d . . . 
H42A H 0.4823 0.7067 0.8461 0.035 Uiso 1 1 calc R . . 
H42B H 0.4984 0.8289 0.9187 0.035 Uiso 1 1 calc R . . 
H42C H 0.4582 0.7022 0.9384 0.035 Uiso 1 1 calc R . . 
C43 C 0.6828(4) 0.5942(4) 0.9223(3) 0.0197(9) Uani 1 1 d . . . 
H43A H 0.6575 0.5540 0.8619 0.030 Uiso 1 1 calc R . . 
H43B H 0.6280 0.5560 0.9540 0.030 Uiso 1 1 calc R . . 
H43C H 0.7777 0.5868 0.9430 0.030 Uiso 1 1 calc R . . 
C44 C 0.7734(4) 0.9732(4) 0.9428(3) 0.0173(9) Uani 1 1 d . . . 
H44 H 0.8591 1.0149 0.9377 0.021 Uiso 1 1 calc R . . 
C45 C 0.6603(4) 1.0343(4) 0.8983(3) 0.0239(10) Uani 1 1 d . . . 
H45A H 0.6637 1.0211 0.8380 0.036 Uiso 1 1 calc R . . 
H45B H 0.6716 1.1213 0.9243 0.036 Uiso 1 1 calc R . . 
H45C H 0.5736 0.9997 0.9041 0.036 Uiso 1 1 calc R . . 
C46 C 0.7729(5) 0.9998(4) 1.0375(3) 0.0256(10) Uani 1 1 d . . . 
H46A H 0.7791 1.0874 1.0605 0.038 Uiso 1 1 calc R . . 
H46B H 0.8496 0.9666 1.0667 0.038 Uiso 1 1 calc R . . 
H46C H 0.6895 0.9623 1.0462 0.038 Uiso 1 1 calc R . . 
C51 C 0.7504(4) 0.6176(4) 0.5249(3) 0.0174(9) Uani 1 1 d . . . 
H51 H 0.7454 0.5501 0.5541 0.021 Uiso 1 1 calc R . . 
C52 C 0.6057(4) 0.6301(4) 0.4841(3) 0.0239(10) Uani 1 1 d . . . 
H52A H 0.6055 0.6898 0.4497 0.036 Uiso 1 1 calc R . . 
H52B H 0.5546 0.6567 0.5286 0.036 Uiso 1 1 calc R . . 
H52C H 0.5644 0.5518 0.4480 0.036 Uiso 1 1 calc R . . 
C53 C 0.8318(4) 0.5766(4) 0.4569(3) 0.0257(10) Uani 1 1 d . . . 
H53A H 0.7941 0.4964 0.4222 0.039 Uiso 1 1 calc R . . 
H53B H 0.9251 0.5729 0.4839 0.039 Uiso 1 1 calc R . . 
H53C H 0.8288 0.6342 0.4208 0.039 Uiso 1 1 calc R . . 
C54 C 0.8153(4) 0.8883(4) 0.5612(3) 0.0171(9) Uani 1 1 d . . . 
H54 H 0.8885 0.9492 0.5982 0.021 Uiso 1 1 calc R . . 
C55 C 0.6834(4) 0.9458(4) 0.5705(3) 0.0250(10) Uani 1 1 d . . . 
H55A H 0.6848 1.0220 0.5525 0.037 Uiso 1 1 calc R . . 
H55B H 0.6743 0.9616 0.6299 0.037 Uiso 1 1 calc R . . 
H55C H 0.6074 0.8903 0.5350 0.037 Uiso 1 1 calc R . . 
C56 C 0.8369(5) 0.8768(5) 0.4718(3) 0.0356(12) Uani 1 1 d . . . 
H56A H 0.7635 0.8230 0.4318 0.053 Uiso 1 1 calc R . . 
H56B H 0.9223 0.8432 0.4664 0.053 Uiso 1 1 calc R . . 
H56C H 0.8388 0.9567 0.4591 0.053 Uiso 1 1 calc R . . 
C61 C 0.5968(4) 0.8089(4) 0.2470(3) 0.0251(10) Uani 1 1 d . . . 
C62 C 0.5647(5) 0.6889(4) 0.2046(3) 0.0311(11) Uani 1 1 d . . . 
H62 H 0.4811 0.6493 0.2058 0.037 Uiso 1 1 calc R . . 
C63 C 0.6516(5) 0.6250(4) 0.1603(3) 0.0309(11) Uani 1 1 d . . . 
H63 H 0.6276 0.5425 0.1316 0.037 Uiso 1 1 calc R . . 
C64 C 0.7739(4) 0.6819(4) 0.1578(3) 0.0256(10) Uani 1 1 d . . . 
H64 H 0.8339 0.6388 0.1273 0.031 Uiso 1 1 calc R . . 
C65 C 0.8077(4) 0.8014(4) 0.2000(3) 0.0259(10) Uani 1 1 d . . . 
H65 H 0.8918 0.8406 0.1992 0.031 Uiso 1 1 calc R . . 
C66 C 0.7197(5) 0.8647(4) 0.2436(3) 0.0281(11) Uani 1 1 d . . . 
H66 H 0.7435 0.9475 0.2716 0.034 Uiso 1 1 calc R . . 
C67 C 0.5023(5) 0.8774(5) 0.2963(3) 0.0349(12) Uani 1 1 d . . . 
H67A H 0.5145 0.9633 0.2965 0.052 Uiso 1 1 calc R . . 
H67B H 0.5215 0.8681 0.3547 0.052 Uiso 1 1 calc R . . 
H67C H 0.4096 0.8453 0.2696 0.052 Uiso 1 1 calc R . . 
C41 C 0.6597(4) 0.7271(4) 0.9348(3) 0.0168(9) Uani 1 1 d . . . 
H41 H 0.6842 0.7635 0.9972 0.020 Uiso 1 1 calc R . . 
 
loop_ 
 _atom_site_aniso_label 
 _atom_site_aniso_U_11 
 _atom_site_aniso_U_22 
 _atom_site_aniso_U_33 
 _atom_site_aniso_U_23 
 _atom_site_aniso_U_13 
 _atom_site_aniso_U_12 
Ir 0.01063(8) 0.01150(8) 0.01130(8) 0.00286(6) 0.00148(5) 0.00162(5) 
N 0.0108(16) 0.0139(17) 0.0098(16) 0.0037(13) 0.0007(12) 0.0040(13) 
P2 0.0113(5) 0.0120(5) 0.0112(5) 0.0018(4) 0.0026(4) 0.0016(4) 
C1 0.025(2) 0.018(2) 0.012(2) 0.0003(17) -0.0007(18) 0.0012(18) 
P1 0.0119(5) 0.0143(5) 0.0101(5) 0.0039(4) 0.0022(4) 0.0022(4) 
Cl 0.0215(5) 0.0153(5) 0.0202(5) 0.0006(4) 0.0066(4) -0.0046(4) 
C11 0.020(2) 0.013(2) 0.0101(19) 0.0030(16) 0.0014(16) 0.0007(16) 
C12 0.020(2) 0.017(2) 0.012(2) 0.0037(16) 0.0023(16) 0.0007(17) 
C13 0.027(2) 0.014(2) 0.014(2) 0.0043(17) 0.0013(17) -0.0036(17) 
C14 0.034(3) 0.015(2) 0.018(2) 0.0030(18) 0.0027(19) 0.0014(19) 
C15 0.032(3) 0.022(2) 0.017(2) 0.0026(18) 0.0076(19) 0.0088(19) 
C16 0.025(2) 0.014(2) 0.012(2) 0.0017(16) 0.0022(17) 0.0032(17) 
C36 0.017(2) 0.021(2) 0.013(2) 0.0067(17) 0.0029(16) 0.0062(17) 
C21 0.0113(18) 0.015(2) 0.0084(19) 0.0046(15) 0.0008(14) -0.0011(15) 
C22 0.0102(18) 0.0095(19) 0.013(2) 0.0031(15) 0.0001(15) 0.0003(15) 
C23 0.015(2) 0.015(2) 0.014(2) 0.0010(16) 0.0034(16) -0.0003(16) 
C24 0.0124(19) 0.013(2) 0.016(2) 0.0046(16) 0.0014(15) 0.0003(15) 
C25 0.014(2) 0.016(2) 0.018(2) 0.0068(17) 0.0012(16) 0.0051(16) 
C27 0.021(2) 0.020(2) 0.015(2) 0.0067(17) 0.0014(17) 0.0067(17) 
C26 0.016(2) 0.016(2) 0.012(2) 0.0026(16) 0.0040(16) 0.0054(16) 
C31 0.0134(19) 0.0112(19) 0.013(2) 0.0024(15) 0.0062(15) 0.0029(15) 
C32 0.0147(19) 0.0088(19) 0.016(2) 0.0021(16) 0.0033(16) 0.0042(15) 
C33 0.019(2) 0.020(2) 0.012(2) 0.0087(17) 0.0030(16) 0.0068(17) 
C35 0.0113(19) 0.022(2) 0.020(2) 0.0050(18) 0.0012(16) -0.0010(16) 
C34 0.016(2) 0.018(2) 0.020(2) 0.0056(17) 0.0065(17) 0.0058(16) 
C37 0.018(2) 0.039(3) 0.024(2) 0.013(2) 0.0050(18) 0.006(2) 
C42 0.014(2) 0.024(2) 0.036(3) 0.012(2) 0.0087(19) 0.0044(18) 
C43 0.022(2) 0.020(2) 0.018(2) 0.0106(18) -0.0005(17) 0.0001(18) 
C44 0.018(2) 0.013(2) 0.019(2) 0.0010(17) 0.0033(17) 0.0003(16) 
C45 0.029(2) 0.016(2) 0.027(2) 0.0036(19) 0.0074(19) 0.0070(19) 
C46 0.036(3) 0.019(2) 0.019(2) 0.0000(18) 0.0022(19) 0.007(2) 
C51 0.015(2) 0.020(2) 0.015(2) 0.0020(17) -0.0004(16) 0.0018(17) 
C52 0.020(2) 0.025(2) 0.022(2) 0.0024(19) -0.0025(18) -0.0018(18) 
C53 0.028(2) 0.024(2) 0.023(2) 0.0001(19) 0.0040(19) 0.0033(19) 
C54 0.023(2) 0.018(2) 0.016(2) 0.0091(17) 0.0069(17) 0.0093(17) 
C55 0.028(2) 0.025(2) 0.029(3) 0.015(2) 0.014(2) 0.012(2) 
C56 0.039(3) 0.041(3) 0.030(3) 0.013(2) 0.008(2) 0.012(2) 
C61 0.027(2) 0.025(3) 0.022(2) 0.0057(19) 0.0026(19) 0.0069(19) 
C62 0.023(2) 0.029(3) 0.040(3) 0.003(2) 0.010(2) -0.003(2) 
C63 0.029(3) 0.019(2) 0.041(3) -0.001(2) 0.008(2) -0.002(2) 
C64 0.022(2) 0.027(3) 0.030(3) 0.009(2) 0.0083(19) 0.0042(19) 
C65 0.021(2) 0.029(3) 0.028(3) 0.009(2) 0.0045(19) -0.0055(19) 
C66 0.032(3) 0.020(2) 0.030(3) 0.003(2) 0.005(2) -0.002(2) 
C67 0.034(3) 0.040(3) 0.031(3) 0.006(2) 0.006(2) 0.012(2) 
C41 0.015(2) 0.020(2) 0.018(2) 0.0087(17) 0.0051(16) 0.0035(17) 
 
_geom_special_details 
; 
 All esds (except the esd in the dihedral angle between two l.s. planes) 
 are estimated using the full covariance matrix.  The cell esds are taken 
 into account individually in the estimation of esds in distances, angles 
 and torsion angles; correlations between esds in cell parameters are only 
 used when they are defined by crystal symmetry.  An approximate (isotropic) 
 treatment of cell esds is used for estimating esds involving l.s. planes. 
; 
 
loop_ 
 _geom_bond_atom_site_label_1 
 _geom_bond_atom_site_label_2 
 _geom_bond_distance 
 _geom_bond_site_symmetry_2 
 _geom_bond_publ_flag 
Ir C1 2.077(4) . ? 
Ir N 2.244(3) . ? 
Ir P2 2.2824(11) . ? 
Ir P1 2.3230(10) . ? 
Ir Cl 2.4883(10) . ? 
Ir H 1.64(5) . ? 
N C21 1.492(5) . ? 
N C31 1.494(5) . ? 
N C11 1.508(5) . ? 
P2 C22 1.836(4) . ? 
P2 C44 1.859(4) . ? 
P2 C41 1.874(4) . ? 
C1 C12 1.504(6) . ? 
C1 H1A 1.03(5) . ? 
C1 H2A 0.99(4) . ? 
P1 C32 1.837(4) . ? 
P1 C51 1.859(4) . ? 
P1 C54 1.866(4) . ? 
C11 C12 1.390(5) . ? 
C11 C16 1.397(5) . ? 
C12 C13 1.397(6) . ? 
C13 C14 1.392(6) . ? 
C13 H13 0.9500 . ? 
C14 C15 1.379(6) . ? 
C14 H14 0.9500 . ? 
C15 C16 1.380(6) . ? 
C15 H15 0.9500 . ? 
C16 H16 0.9500 . ? 
C36 C31 1.379(5) . ? 
C36 C35 1.396(5) . ? 
C36 H36 0.9500 . ? 
C21 C22 1.392(5) . ? 
C21 C26 1.404(5) . ? 
C22 C23 1.406(5) . ? 
C23 C24 1.383(5) . ? 
C23 H23 0.9500 . ? 
C24 C25 1.386(5) . ? 
C24 C27 1.507(5) . ? 
C25 C26 1.378(5) . ? 
C25 H25 0.9500 . ? 
C27 H27A 0.9800 . ? 
C27 H27B 0.9800 . ? 
C27 H27C 0.9800 . ? 
C26 H26 0.9500 . ? 
C31 C32 1.405(5) . ? 
C32 C33 1.394(5) . ? 
C33 C34 1.391(5) . ? 
C33 H33 0.9500 . ? 
C35 C34 1.375(6) . ? 
C35 H35 0.9500 . ? 
C34 C37 1.505(6) . ? 
C37 H37A 0.9800 . ? 
C37 H37B 0.9800 . ? 
C37 H37C 0.9800 . ? 
C42 C41 1.530(5) . ? 
C42 H42A 0.9800 . ? 
C42 H42B 0.9800 . ? 
C42 H42C 0.9800 . ? 
C43 C41 1.519(6) . ? 
C43 H43A 0.9800 . ? 
C43 H43B 0.9800 . ? 
C43 H43C 0.9800 . ? 
C44 C46 1.527(6) . ? 
C44 C45 1.535(6) . ? 
C44 H44 1.0000 . ? 
C45 H45A 0.9800 . ? 
C45 H45B 0.9800 . ? 
C45 H45C 0.9800 . ? 
C46 H46A 0.9800 . ? 
C46 H46B 0.9800 . ? 
C46 H46C 0.9800 . ? 
C51 C53 1.522(6) . ? 
C51 C52 1.533(5) . ? 
C51 H51 1.0000 . ? 
C52 H52A 0.9800 . ? 
C52 H52B 0.9800 . ? 
C52 H52C 0.9800 . ? 
C53 H53A 0.9800 . ? 
C53 H53B 0.9800 . ? 
C53 H53C 0.9800 . ? 
C54 C56 1.512(6) . ? 
C54 C55 1.544(5) . ? 
C54 H54 1.0000 . ? 
C55 H55A 0.9800 . ? 
C55 H55B 0.9800 . ? 
C55 H55C 0.9800 . ? 
C56 H56A 0.9800 . ? 
C56 H56B 0.9800 . ? 
C56 H56C 0.9800 . ? 
C61 C62 1.382(6) . ? 
C61 C66 1.392(6) . ? 
C61 C67 1.510(6) . ? 
C62 C63 1.384(6) . ? 
C62 H62 0.9500 . ? 
C63 C64 1.387(6) . ? 
C63 H63 0.9500 . ? 
C64 C65 1.378(6) . ? 
C64 H64 0.9500 . ? 
C65 C66 1.384(6) . ? 
C65 H65 0.9500 . ? 
C66 H66 0.9500 . ? 
C67 H67A 0.9800 . ? 
C67 H67B 0.9800 . ? 
C67 H67C 0.9800 . ? 
C41 H41 1.0000 . ? 
 
loop_ 
 _geom_angle_atom_site_label_1 
 _geom_angle_atom_site_label_2 
 _geom_angle_atom_site_label_3 
 _geom_angle 
 _geom_angle_site_symmetry_1 
 _geom_angle_site_symmetry_3 
 _geom_angle_publ_flag 
C1 Ir N 84.23(14) . . ? 
C1 Ir P2 94.69(12) . . ? 
N Ir P2 86.23(8) . . ? 
C1 Ir P1 92.39(12) . . ? 
N Ir P1 81.96(8) . . ? 
P2 Ir P1 165.55(3) . . ? 
C1 Ir Cl 175.18(12) . . ? 
N Ir Cl 91.62(9) . . ? 
P2 Ir Cl 87.47(3) . . ? 
P1 Ir Cl 84.58(3) . . ? 
C1 Ir H 85.5(17) . . ? 
N Ir H 169.6(17) . . ? 
P2 Ir H 96.3(17) . . ? 
P1 Ir H 96.8(17) . . ? 
Cl Ir H 98.6(17) . . ? 
C21 N C31 115.3(3) . . ? 
C21 N C11 108.6(3) . . ? 
C31 N C11 109.9(3) . . ? 
C21 N Ir 111.3(2) . . ? 
C31 N Ir 107.2(2) . . ? 
C11 N Ir 104.1(2) . . ? 
C22 P2 C44 108.50(18) . . ? 
C22 P2 C41 99.42(17) . . ? 
C44 P2 C41 104.20(19) . . ? 
C22 P2 Ir 100.27(12) . . ? 
C44 P2 Ir 115.84(14) . . ? 
C41 P2 Ir 126.14(14) . . ? 
C12 C1 Ir 109.0(3) . . ? 
C12 C1 H1A 107(2) . . ? 
Ir C1 H1A 111(3) . . ? 
C12 C1 H2A 112(2) . . ? 
Ir C1 H2A 109(2) . . ? 
H1A C1 H2A 109(3) . . ? 
C32 P1 C51 106.08(17) . . ? 
C32 P1 C54 104.42(18) . . ? 
C51 P1 C54 108.46(19) . . ? 
C32 P1 Ir 98.50(13) . . ? 
C51 P1 Ir 120.12(14) . . ? 
C54 P1 Ir 116.87(13) . . ? 
C12 C11 C16 120.9(4) . . ? 
C12 C11 N 118.7(3) . . ? 
C16 C11 N 120.4(3) . . ? 
C11 C12 C13 117.8(4) . . ? 
C11 C12 C1 120.8(4) . . ? 
C13 C12 C1 121.1(4) . . ? 
C14 C13 C12 121.1(4) . . ? 
C14 C13 H13 119.4 . . ? 
C12 C13 H13 119.4 . . ? 
C15 C14 C13 120.0(4) . . ? 
C15 C14 H14 120.0 . . ? 
C13 C14 H14 120.0 . . ? 
C14 C15 C16 119.7(4) . . ? 
C14 C15 H15 120.1 . . ? 
C16 C15 H15 120.1 . . ? 
C15 C16 C11 120.1(4) . . ? 
C15 C16 H16 119.9 . . ? 
C11 C16 H16 119.9 . . ? 
C31 C36 C35 120.5(4) . . ? 
C31 C36 H36 119.7 . . ? 
C35 C36 H36 119.7 . . ? 
C22 C21 C26 118.8(3) . . ? 
C22 C21 N 121.9(3) . . ? 
C26 C21 N 119.2(3) . . ? 
C21 C22 C23 118.5(3) . . ? 
C21 C22 P2 118.8(3) . . ? 
C23 C22 P2 121.9(3) . . ? 
C24 C23 C22 123.0(4) . . ? 
C24 C23 H23 118.5 . . ? 
C22 C23 H23 118.5 . . ? 
C23 C24 C25 117.2(4) . . ? 
C23 C24 C27 121.9(3) . . ? 
C25 C24 C27 120.8(3) . . ? 
C26 C25 C24 121.5(4) . . ? 
C26 C25 H25 119.2 . . ? 
C24 C25 H25 119.2 . . ? 
C24 C27 H27A 109.5 . . ? 
C24 C27 H27B 109.5 . . ? 
H27A C27 H27B 109.5 . . ? 
C24 C27 H27C 109.5 . . ? 
H27A C27 H27C 109.5 . . ? 
H27B C27 H27C 109.5 . . ? 
C25 C26 C21 120.9(3) . . ? 
C25 C26 H26 119.5 . . ? 
C21 C26 H26 119.5 . . ? 
C36 C31 C32 119.3(3) . . ? 
C36 C31 N 123.3(3) . . ? 
C32 C31 N 117.4(3) . . ? 
C33 C32 C31 118.2(3) . . ? 
C33 C32 P1 123.4(3) . . ? 
C31 C32 P1 117.5(3) . . ? 
C34 C33 C32 122.7(4) . . ? 
C34 C33 H33 118.6 . . ? 
C32 C33 H33 118.6 . . ? 
C34 C35 C36 121.3(4) . . ? 
C34 C35 H35 119.3 . . ? 
C36 C35 H35 119.3 . . ? 
C35 C34 C33 117.4(4) . . ? 
C35 C34 C37 121.4(4) . . ? 
C33 C34 C37 121.2(4) . . ? 
C34 C37 H37A 109.5 . . ? 
C34 C37 H37B 109.5 . . ? 
H37A C37 H37B 109.5 . . ? 
C34 C37 H37C 109.5 . . ? 
H37A C37 H37C 109.5 . . ? 
H37B C37 H37C 109.5 . . ? 
C41 C42 H42A 109.5 . . ? 
C41 C42 H42B 109.5 . . ? 
H42A C42 H42B 109.5 . . ? 
C41 C42 H42C 109.5 . . ? 
H42A C42 H42C 109.5 . . ? 
H42B C42 H42C 109.5 . . ? 
C41 C43 H43A 109.5 . . ? 
C41 C43 H43B 109.5 . . ? 
H43A C43 H43B 109.5 . . ? 
C41 C43 H43C 109.5 . . ? 
H43A C43 H43C 109.5 . . ? 
H43B C43 H43C 109.5 . . ? 
C46 C44 C45 109.4(3) . . ? 
C46 C44 P2 118.4(3) . . ? 
C45 C44 P2 110.1(3) . . ? 
C46 C44 H44 106.0 . . ? 
C45 C44 H44 106.0 . . ? 
P2 C44 H44 106.0 . . ? 
C44 C45 H45A 109.5 . . ? 
C44 C45 H45B 109.5 . . ? 
H45A C45 H45B 109.5 . . ? 
C44 C45 H45C 109.5 . . ? 
H45A C45 H45C 109.5 . . ? 
H45B C45 H45C 109.5 . . ? 
C44 C46 H46A 109.5 . . ? 
C44 C46 H46B 109.5 . . ? 
H46A C46 H46B 109.5 . . ? 
C44 C46 H46C 109.5 . . ? 
H46A C46 H46C 109.5 . . ? 
H46B C46 H46C 109.5 . . ? 
C53 C51 C52 110.4(3) . . ? 
C53 C51 P1 116.8(3) . . ? 
C52 C51 P1 110.6(3) . . ? 
C53 C51 H51 106.1 . . ? 
C52 C51 H51 106.1 . . ? 
P1 C51 H51 106.1 . . ? 
C51 C52 H52A 109.5 . . ? 
C51 C52 H52B 109.5 . . ? 
H52A C52 H52B 109.5 . . ? 
C51 C52 H52C 109.5 . . ? 
H52A C52 H52C 109.5 . . ? 
H52B C52 H52C 109.5 . . ? 
C51 C53 H53A 109.5 . . ? 
C51 C53 H53B 109.5 . . ? 
H53A C53 H53B 109.5 . . ? 
C51 C53 H53C 109.5 . . ? 
H53A C53 H53C 109.5 . . ? 
H53B C53 H53C 109.5 . . ? 
C56 C54 C55 109.4(3) . . ? 
C56 C54 P1 120.9(3) . . ? 
C55 C54 P1 108.8(3) . . ? 
C56 C54 H54 105.6 . . ? 
C55 C54 H54 105.6 . . ? 
P1 C54 H54 105.6 . . ? 
C54 C55 H55A 109.5 . . ? 
C54 C55 H55B 109.5 . . ? 
H55A C55 H55B 109.5 . . ? 
C54 C55 H55C 109.5 . . ? 
H55A C55 H55C 109.5 . . ? 
H55B C55 H55C 109.5 . . ? 
C54 C56 H56A 109.5 . . ? 
C54 C56 H56B 109.5 . . ? 
H56A C56 H56B 109.5 . . ? 
C54 C56 H56C 109.5 . . ? 
H56A C56 H56C 109.5 . . ? 
H56B C56 H56C 109.5 . . ? 
C62 C61 C66 117.9(4) . . ? 
C62 C61 C67 121.2(4) . . ? 
C66 C61 C67 120.9(4) . . ? 
C61 C62 C63 121.5(4) . . ? 
C61 C62 H62 119.2 . . ? 
C63 C62 H62 119.2 . . ? 
C62 C63 C64 119.8(4) . . ? 
C62 C63 H63 120.1 . . ? 
C64 C63 H63 120.1 . . ? 
C65 C64 C63 119.4(4) . . ? 
C65 C64 H64 120.3 . . ? 
C63 C64 H64 120.3 . . ? 
C64 C65 C66 120.3(4) . . ? 
C64 C65 H65 119.8 . . ? 
C66 C65 H65 119.8 . . ? 
C65 C66 C61 121.0(4) . . ? 
C65 C66 H66 119.5 . . ? 
C61 C66 H66 119.5 . . ? 
C61 C67 H67A 109.5 . . ? 
C61 C67 H67B 109.5 . . ? 
H67A C67 H67B 109.5 . . ? 
C61 C67 H67C 109.5 . . ? 
H67A C67 H67C 109.5 . . ? 
H67B C67 H67C 109.5 . . ? 
C43 C41 C42 111.1(3) . . ? 
C43 C41 P2 113.5(3) . . ? 
C42 C41 P2 112.0(3) . . ? 
C43 C41 H41 106.6 . . ? 
C42 C41 H41 106.6 . . ? 
P2 C41 H41 106.6 . . ? 
 
_diffrn_measured_fraction_theta_max    0.991 
_diffrn_reflns_theta_full              25.00 
_diffrn_measured_fraction_theta_full   1.000 
_refine_diff_density_max    1.312 
_refine_diff_density_min   -1.067 
_refine_diff_density_rms    0.132
_iucr_refine_instructions_details
;
TITL SV18_2 in P-1
CELL 0.71073  10.1952  11.4033  16.5212 102.990 100.621  92.946
ZERR    2.00   0.0017   0.0019   0.0028   0.004   0.004   0.004
LATT 1
SFAC C H N P CL IR
UNIT 80 110 2 4 2 2
LIST 6 ! automatically inserted. Change 6 to 4 for CHECKCIF!!
TEMP -153.16
BOND $H
Acta 50
 
L.S. 4
BOND
FMAP 2
PLAN 20
 
WGHT    0.016800    3.150000
FVAR       0.12528
IR    6    0.766100    0.782135    0.742404    11.00000    0.01063    0.01150 =
         0.01130    0.00286    0.00148    0.00162
N     3    0.945917    0.679903    0.766394    11.00000    0.01076    0.01390 =
         0.00978    0.00374    0.00071    0.00396
P2    4    0.769468    0.813082    0.884179    11.00000    0.01126    0.01204 =
         0.01115    0.00177    0.00259    0.00159
H1A   2    0.598558    0.596084    0.651572    11.00000    0.02934
C1    1    0.659715    0.612513    0.710829    11.00000    0.02460    0.01837 =
         0.01175    0.00025   -0.00070    0.00125
P1    4    0.820885    0.755083    0.609461    11.00000    0.01193    0.01430 =
         0.01015    0.00388    0.00218    0.00220
CL    5    0.909489    0.976892    0.775864    11.00000    0.02147    0.01529 =
         0.02020    0.00060    0.00661   -0.00460
C11   1    0.894516    0.550036    0.724398    11.00000    0.01966    0.01326 =
         0.01010    0.00301    0.00141    0.00073
H2A   2    0.603828    0.609038    0.753261    11.00000    0.01781
C12   1    0.757059    0.517604    0.706495    11.00000    0.01981    0.01742 =
         0.01191    0.00373    0.00227    0.00066
C13   1    0.712440    0.394877    0.676169    11.00000    0.02658    0.01404 =
         0.01386    0.00429    0.00130   -0.00356
AFIX  43
H13   2    0.619134    0.370128    0.664769    11.00000   -1.20000
AFIX   0
C14   1    0.802400    0.308234    0.662372    11.00000    0.03447    0.01486 =
         0.01808    0.00300    0.00269    0.00138
AFIX  43
H14   2    0.770707    0.224866    0.644409    11.00000   -1.20000
AFIX   0
C15   1    0.937462    0.343360    0.674764    11.00000    0.03152    0.02162 =
         0.01744    0.00258    0.00762    0.00882
AFIX  43
H15   2    0.998341    0.284731    0.662296    11.00000   -1.20000
AFIX   0
C16   1    0.983874    0.463999    0.705346    11.00000    0.02544    0.01423 =
         0.01212    0.00174    0.00224    0.00322
AFIX  43
H16   2    1.076769    0.488567    0.713454    11.00000   -1.20000
AFIX   0
C36   1    1.182621    0.743291    0.756429    11.00000    0.01652    0.02104 =
         0.01324    0.00672    0.00291    0.00620
AFIX  43
H36   2    1.214087    0.738475    0.813296    11.00000   -1.20000
AFIX   0
C21   1    0.993721    0.690532    0.858947    11.00000    0.01134    0.01450 =
         0.00837    0.00455    0.00081   -0.00113
C22   1    0.930672    0.757214    0.919540    11.00000    0.01017    0.00948 =
         0.01348    0.00315    0.00013    0.00031
C23   1    0.981009    0.761931    1.005482    11.00000    0.01454    0.01472 =
         0.01378    0.00100    0.00345   -0.00031
AFIX  43
H23   2    0.939730    0.809372    1.046963    11.00000   -1.20000
AFIX   0
C24   1    1.087928    0.700622    1.032390    11.00000    0.01237    0.01299 =
         0.01573    0.00461    0.00136    0.00029
C25   1    1.145866    0.631846    0.970455    11.00000    0.01444    0.01644 =
         0.01823    0.00677    0.00122    0.00511
AFIX  43
H25   2    1.219178    0.588330    0.986888    11.00000   -1.20000
AFIX   0
C27   1    1.137015    0.703871    1.124765    11.00000    0.02139    0.02028 =
         0.01501    0.00669    0.00142    0.00666
AFIX 137
H27A  2    1.086335    0.639666    1.140126    11.00000   -1.50000
H27B  2    1.124109    0.782551    1.159522    11.00000   -1.50000
H27C  2    1.232516    0.691509    1.134705    11.00000   -1.50000
AFIX   0
H     2    0.619871    0.832494    0.717485    11.00000    0.04403
C26   1    1.099583    0.625136    0.885602    11.00000    0.01601    0.01613 =
         0.01210    0.00264    0.00396    0.00538
AFIX  43
H26   2    1.139882    0.575555    0.844558    11.00000   -1.20000
AFIX   0
C31   1    1.047259    0.722555    0.721935    11.00000    0.01337    0.01116 =
         0.01328    0.00244    0.00623    0.00290
C32   1    1.000490    0.739533    0.640260    11.00000    0.01466    0.00881 =
         0.01587    0.00206    0.00328    0.00416
C33   1    1.094772    0.763140    0.593233    11.00000    0.01904    0.02026 =
         0.01191    0.00870    0.00302    0.00681
AFIX  43
H33   2    1.063931    0.770127    0.536796    11.00000   -1.20000
AFIX   0
C35   1    1.273824    0.771310    0.708466    11.00000    0.01135    0.02164 =
         0.01958    0.00502    0.00117   -0.00098
AFIX  43
H35   2    1.366529    0.786826    0.733654    11.00000   -1.20000
AFIX   0
C34   1    1.232137    0.776892    0.625501    11.00000    0.01588    0.01763 =
         0.01965    0.00561    0.00648    0.00585
C37   1    1.330995    0.800899    0.572411    11.00000    0.01760    0.03942 =
         0.02428    0.01297    0.00503    0.00587
AFIX 137
H37A  2    1.315667    0.737246    0.519847    11.00000   -1.50000
H37B  2    1.422419    0.801613    0.604103    11.00000   -1.50000
H37C  2    1.319264    0.879470    0.558718    11.00000   -1.50000
AFIX   0
C42   1    0.511314    0.742630    0.907020    11.00000    0.01446    0.02409 =
         0.03595    0.01159    0.00867    0.00436
AFIX 137
H42A  2    0.482267    0.706684    0.846117    11.00000   -1.50000
H42B  2    0.498388    0.828930    0.918719    11.00000   -1.50000
H42C  2    0.458199    0.702247    0.938448    11.00000   -1.50000
AFIX   0
C43   1    0.682804    0.594174    0.922302    11.00000    0.02249    0.01968 =
         0.01785    0.01056   -0.00054    0.00009
AFIX 137
H43A  2    0.657548    0.554039    0.861866    11.00000   -1.50000
H43B  2    0.628004    0.556012    0.953972    11.00000   -1.50000
H43C  2    0.777734    0.586751    0.943028    11.00000   -1.50000
AFIX   0
C44   1    0.773395    0.973173    0.942822    11.00000    0.01782    0.01292 =
         0.01944    0.00103    0.00330    0.00028
AFIX  13
H44   2    0.859115    1.014851    0.937652    11.00000   -1.20000
AFIX   0
C45   1    0.660350    1.034348    0.898287    11.00000    0.02904    0.01649 =
         0.02667    0.00359    0.00736    0.00696
AFIX 137
H45A  2    0.663727    1.021107    0.838037    11.00000   -1.50000
H45B  2    0.671585    1.121332    0.924329    11.00000   -1.50000
H45C  2    0.573578    0.999655    0.904067    11.00000   -1.50000
AFIX   0
C46   1    0.772873    0.999750    1.037548    11.00000    0.03575    0.01919 =
         0.01889    0.00005    0.00223    0.00703
AFIX 137
H46A  2    0.779133    1.087381    1.060457    11.00000   -1.50000
H46B  2    0.849615    0.966648    1.066745    11.00000   -1.50000
H46C  2    0.689535    0.962280    1.046245    11.00000   -1.50000
AFIX   0
C51   1    0.750366    0.617611    0.524859    11.00000    0.01530    0.01957 =
         0.01493    0.00201   -0.00040    0.00180
AFIX  13
H51   2    0.745361    0.550129    0.554086    11.00000   -1.20000
AFIX   0
C52   1    0.605659    0.630111    0.484118    11.00000    0.02045    0.02471 =
         0.02179    0.00243   -0.00251   -0.00181
AFIX 137
H52A  2    0.605466    0.689798    0.449697    11.00000   -1.50000
H52B  2    0.554624    0.656738    0.528621    11.00000   -1.50000
H52C  2    0.564350    0.551788    0.447984    11.00000   -1.50000
AFIX   0
C53   1    0.831848    0.576636    0.456884    11.00000    0.02752    0.02392 =
         0.02259    0.00008    0.00400    0.00326
AFIX 137
H53A  2    0.794096    0.496380    0.422241    11.00000   -1.50000
H53B  2    0.925059    0.572904    0.483896    11.00000   -1.50000
H53C  2    0.828844    0.634248    0.420757    11.00000   -1.50000
AFIX   0
C54   1    0.815303    0.888274    0.561234    11.00000    0.02264    0.01752 =
         0.01574    0.00913    0.00692    0.00932
AFIX  13
H54   2    0.888462    0.949175    0.598223    11.00000   -1.20000
AFIX   0
C55   1    0.683409    0.945790    0.570530    11.00000    0.02840    0.02519 =
         0.02938    0.01471    0.01380    0.01160
AFIX 137
H55A  2    0.684799    1.021982    0.552504    11.00000   -1.50000
H55B  2    0.674320    0.961617    0.629948    11.00000   -1.50000
H55C  2    0.607386    0.890281    0.535040    11.00000   -1.50000
AFIX   0
C56   1    0.836871    0.876787    0.471763    11.00000    0.03899    0.04130 =
         0.02978    0.01256    0.00784    0.01211
AFIX 137
H56A  2    0.763529    0.822984    0.431784    11.00000   -1.50000
H56B  2    0.922286    0.843197    0.466394    11.00000   -1.50000
H56C  2    0.838777    0.956734    0.459121    11.00000   -1.50000
AFIX   0
C61   1    0.596794    0.808934    0.247009    11.00000    0.02734    0.02546 =
         0.02215    0.00571    0.00262    0.00687
C62   1    0.564725    0.688898    0.204558    11.00000    0.02313    0.02864 =
         0.04021    0.00332    0.01050   -0.00301
AFIX  43
H62   2    0.481099    0.649282    0.205809    11.00000   -1.20000
AFIX   0
C63   1    0.651636    0.625048    0.160256    11.00000    0.02895    0.01904 =
         0.04098   -0.00064    0.00822   -0.00225
AFIX  43
H63   2    0.627584    0.542547    0.131614    11.00000   -1.20000
AFIX   0
C64   1    0.773892    0.681893    0.157823    11.00000    0.02217    0.02688 =
         0.03004    0.00871    0.00828    0.00417
AFIX  43
H64   2    0.833852    0.638799    0.127304    11.00000   -1.20000
AFIX   0
C65   1    0.807690    0.801425    0.200046    11.00000    0.02091    0.02863 =
         0.02807    0.00899    0.00449   -0.00549
AFIX  43
H65   2    0.891819    0.840562    0.199246    11.00000   -1.20000
AFIX   0
C66   1    0.719704    0.864735    0.243605    11.00000    0.03178    0.01992 =
         0.03032    0.00340    0.00484   -0.00186
AFIX  43
H66   2    0.743516    0.947504    0.271603    11.00000   -1.20000
AFIX   0
C67   1    0.502301    0.877438    0.296283    11.00000    0.03378    0.03992 =
         0.03073    0.00620    0.00588    0.01232
AFIX 137
H67A  2    0.514527    0.963320    0.296497    11.00000   -1.50000
H67B  2    0.521492    0.868125    0.354725    11.00000   -1.50000
H67C  2    0.409578    0.845312    0.269595    11.00000   -1.50000
AFIX   0
C41   1    0.659745    0.727064    0.934767    11.00000    0.01512    0.01971 =
         0.01844    0.00875    0.00512    0.00351
AFIX  13
H41   2    0.684243    0.763497    0.997179    11.00000   -1.20000
REM #####
REM #####
HKLF 4
 
REM  SV18_2 in P-1
REM R1 =  0.0305 for   6759 Fo > 4sig(Fo)  and  0.0371 for all   7470 data
REM    429 parameters refined using      0 restraints
 
END  
     
WGHT      0.0168      3.1496 
REM Highest difference peak  1.312,  deepest hole -1.067,  1-sigma level  0.132
Q1    1   0.9119  0.9883  0.5835  11.00000  0.05    1.31
Q2    1   0.7098  0.6536  0.7738  11.00000  0.05    1.25
Q3    1   0.7200  0.7849  0.6557  11.00000  0.05    1.04
Q4    1   0.7838  0.7437  0.8111  11.00000  0.05    0.98
Q5    1   0.8122  0.7819  0.8279  11.00000  0.05    0.85
Q6    1   0.7775  0.8433  0.7045  11.00000  0.05    0.78
Q7    1   0.7898  0.8994  0.7472  11.00000  0.05    0.77
Q8    1   0.7496  0.6608  0.7244  11.00000  0.05    0.75
Q9    1   0.7321  0.7021  0.6753  11.00000  0.05    0.75
Q10   1   0.8653  0.7834  0.6983  11.00000  0.05    0.73
Q11   1   0.6812  0.6740  0.7081  11.00000  0.05    0.73
Q12   1   0.7304  0.5829  0.7257  11.00000  0.05    0.71
Q13   1   0.8129  0.8442  0.8054  11.00000  0.05    0.71
Q14   1   0.8478  0.7673  0.6801  11.00000  0.05    0.69
Q15   1   0.8123  0.8800  0.8025  11.00000  0.05    0.69
Q16   1   0.7535  0.6798  0.5543  11.00000  0.05    0.69
Q17   1   0.7445  0.7395  0.7753  11.00000  0.05    0.67
Q18   1   0.6593  0.7537  0.7728  11.00000  0.05    0.61
Q19   1   0.8285  0.8212  0.5848  11.00000  0.05    0.61
Q20   1   0.7672  0.8993  0.9154  11.00000  0.05    0.58

; 


 
data_sv42 
 
_audit_creation_method            SHELXL-97 
_chemical_name_systematic 
; 
 ? 
; 
_chemical_name_common             ? 
_chemical_melting_point           ? 
_chemical_formula_moiety          ? 
_chemical_formula_sum 
 'C72 H95 Ir2 N2 P4' 
_chemical_formula_weight          1496.78 
 
loop_ 
 _atom_type_symbol 
 _atom_type_description 
 _atom_type_scat_dispersion_real 
 _atom_type_scat_dispersion_imag 
 _atom_type_scat_source 
 'C'  'C'   0.0033   0.0016 
 'International Tables Vol C Tables 4.2.6.8 and 6.1.1.4' 
 'H'  'H'   0.0000   0.0000 
 'International Tables Vol C Tables 4.2.6.8 and 6.1.1.4' 
 'N'  'N'   0.0061   0.0033 
 'International Tables Vol C Tables 4.2.6.8 and 6.1.1.4' 
 'P'  'P'   0.1023   0.0942 
 'International Tables Vol C Tables 4.2.6.8 and 6.1.1.4' 
 'Ir'  'Ir'  -1.4442   7.9887 
 'International Tables Vol C Tables 4.2.6.8 and 6.1.1.4' 
 
_symmetry_cell_setting            'orthorhombic' 
_symmetry_space_group_name_H-M    'Aba2' 
 
loop_ 
 _symmetry_equiv_pos_as_xyz 
 'x, y, z' 
 '-x, -y, z' 
 'x+1/2, -y+1/2, z' 
 '-x+1/2, y+1/2, z' 
 'x, y+1/2, z+1/2' 
 '-x, -y+1/2, z+1/2' 
 'x+1/2, -y+1, z+1/2' 
 '-x+1/2, y+1, z+1/2' 
 
_cell_length_a                    16.455(2) 
_cell_length_b                    28.172(3) 
_cell_length_c                    28.440(3) 
_cell_angle_alpha                 90.00 
_cell_angle_beta                  90.00 
_cell_angle_gamma                 90.00 
_cell_volume                      13184(3) 
_cell_formula_units_Z             8 
_cell_measurement_temperature     120(2) 
_cell_measurement_reflns_used     9929 
_cell_measurement_theta_min       2.38 
_cell_measurement_theta_max       27.94 
 
_exptl_crystal_description        'block' 
_exptl_crystal_colour             ? 
_exptl_crystal_size_max           0.03 
_exptl_crystal_size_mid           0.02 
_exptl_crystal_size_min           0.02 
_exptl_crystal_density_meas       ? 
_exptl_crystal_density_diffrn     1.508 
_exptl_crystal_density_method     'not measured' 
_exptl_crystal_F_000              6040 
_exptl_absorpt_coefficient_mu     4.173 
_exptl_absorpt_correction_type    'multi-scan' 
_exptl_absorpt_correction_T_min   0.5832 
_exptl_absorpt_correction_T_max   0.7457 
_exptl_absorpt_process_details    'Bruker AXS area detector scaling and absorption correction' 
 
_exptl_special_details 
; 
 ? 
; 
 
_diffrn_ambient_temperature       120(2) 
_diffrn_radiation_wavelength      0.71073 
_diffrn_radiation_type            MoK\a 
_diffrn_radiation_source          'fine-focus sealed tube' 
_diffrn_radiation_monochromator   graphite 
_diffrn_measurement_device_type   'Bruker APEX-II' 
_diffrn_measurement_method        ? 
_diffrn_detector_area_resol_mean  ? 
_diffrn_standards_number          ? 
_diffrn_standards_interval_count  ? 
_diffrn_standards_interval_time   ? 
_diffrn_standards_decay_%         ? 
_diffrn_reflns_number             77505 
_diffrn_reflns_av_R_equivalents   0.0571 
_diffrn_reflns_av_sigmaI/netI     0.0448 
_diffrn_reflns_limit_h_min        -19 
_diffrn_reflns_limit_h_max        19 
_diffrn_reflns_limit_k_min        -33 
_diffrn_reflns_limit_k_max        33 
_diffrn_reflns_limit_l_min        -28 
_diffrn_reflns_limit_l_max        33 
_diffrn_reflns_theta_min          1.43 
_diffrn_reflns_theta_max          25.00 
_reflns_number_total              11178 
_reflns_number_gt                 10089 
_reflns_threshold_expression      >2sigma(I) 
 
_computing_data_collection        ? 
_computing_cell_refinement        ? 
_computing_data_reduction         ? 
_computing_structure_solution     'SHELXS-97 (Sheldrick, 1990)' 
_computing_structure_refinement   'SHELXL-97 (Sheldrick, 1997)' 
_computing_molecular_graphics     ? 
_computing_publication_material   ? 
 
_refine_special_details 
; 
 Refinement of F^2^ against ALL reflections.  The weighted R-factor wR and 
 goodness of fit S are based on F^2^, conventional R-factors R are based 
 on F, with F set to zero for negative F^2^. The threshold expression of 
 F^2^ > 2sigma(F^2^) is used only for calculating R-factors(gt) etc. and is 
 not relevant to the choice of reflections for refinement.  R-factors based 
 on F^2^ are statistically about twice as large as those based on F, and R- 
 factors based on ALL data will be even larger. 
; 
 
_refine_ls_structure_factor_coef  Fsqd  
_refine_ls_matrix_type            full 
_refine_ls_weighting_scheme       calc  
_refine_ls_weighting_details 
 'calc w=1/[\s^2^(Fo^2^)+(0.0114P)^2^+0.0000P] where P=(Fo^2^+2Fc^2^)/3' 
_atom_sites_solution_primary      direct 
_atom_sites_solution_secondary    difmap 
_atom_sites_solution_hydrogens    geom 
_refine_ls_hydrogen_treatment     mixed 
_refine_ls_extinction_method      none 
_refine_ls_extinction_coef        ? 
_refine_ls_abs_structure_details 
 'Flack H D (1983), Acta Cryst. A39, 876-881' 
_refine_ls_abs_structure_Flack    -0.011(4) 
_refine_ls_number_reflns          11178 
_refine_ls_number_parameters      750 
_refine_ls_number_restraints      1 
_refine_ls_R_factor_all           0.0317 
_refine_ls_R_factor_gt            0.0263 
_refine_ls_wR_factor_ref          0.0471 
_refine_ls_wR_factor_gt           0.0454 
_refine_ls_goodness_of_fit_ref    1.029 
_refine_ls_restrained_S_all       1.029 
_refine_ls_shift/su_max           0.007 
_refine_ls_shift/su_mean          0.000 
 
loop_ 
 _atom_site_label 
 _atom_site_type_symbol 
 _atom_site_fract_x 
 _atom_site_fract_y 
 _atom_site_fract_z 
 _atom_site_U_iso_or_equiv 
 _atom_site_adp_type 
 _atom_site_occupancy 
 _atom_site_symmetry_multiplicity 
 _atom_site_calc_flag 
 _atom_site_refinement_flags 
 _atom_site_disorder_assembly 
 _atom_site_disorder_group 
Ir1 Ir 0.197478(11) 0.628906(7) 0.495418(6) 0.01634(5) Uani 1 1 d . . . 
N1 N 0.2030(2) 0.57482(14) 0.43635(14) 0.0153(9) Uani 1 1 d . . . 
Ir2 Ir 0.298815(11) 0.347153(6) 0.184691(7) 0.01540(5) Uani 1 1 d . . . 
H3 H 0.322(3) 0.3610(15) 0.1415(16) 0.018 Uiso 1 1 d . . . 
N2 N 0.2481(3) 0.31756(13) 0.25237(15) 0.0164(9) Uani 1 1 d . . . 
C10 C 0.2746(3) 0.58894(19) 0.40714(17) 0.0176(12) Uani 1 1 d . . . 
H1 H 0.169(3) 0.5967(16) 0.5236(15) 0.021 Uiso 1 1 d . . . 
H2 H 0.195(3) 0.6663(16) 0.5281(16) 0.021 Uiso 1 1 d . . . 
C11 C 0.3157(3) 0.55671(19) 0.38041(18) 0.0213(12) Uani 1 1 d . . . 
H14 H 0.3016 0.5240 0.3814 0.026 Uiso 1 1 calc R . . 
P11 P 0.30412(8) 0.58527(5) 0.52232(5) 0.0163(3) Uani 1 1 d . . . 
C12 C 0.3798(3) 0.5728(2) 0.35110(18) 0.0286(14) Uani 1 1 d . . . 
H15 H 0.4095 0.5508 0.3325 0.034 Uiso 1 1 calc R . . 
P12 P 0.06935(8) 0.64185(5) 0.47249(5) 0.0214(3) Uani 1 1 d . . . 
C13 C 0.3988(3) 0.6197(2) 0.34959(19) 0.0276(14) Uani 1 1 d . . . 
H13 H 0.4405 0.6301 0.3289 0.033 Uiso 1 1 calc R . . 
C14 C 0.3584(3) 0.65360(19) 0.37772(18) 0.0203(12) Uani 1 1 d . . . 
C15 C 0.2961(3) 0.63809(18) 0.40971(17) 0.0168(11) Uani 1 1 d . . . 
C16 C 0.3798(3) 0.7018(2) 0.3785(2) 0.0315(14) Uani 1 1 d . . . 
H16 H 0.4207 0.7134 0.3580 0.038 Uiso 1 1 calc R . . 
C18 C 0.2837(3) 0.71546(18) 0.44162(19) 0.0234(13) Uani 1 1 d . . . 
H18 H 0.2591 0.7375 0.4626 0.028 Uiso 1 1 calc R . . 
C19 C 0.2612(3) 0.66789(18) 0.44436(18) 0.0194(13) Uani 1 1 d . . . 
C17 C 0.3413(3) 0.7322(2) 0.4091(2) 0.0321(15) Uani 1 1 d . . . 
H17 H 0.3539 0.7651 0.4083 0.039 Uiso 1 1 calc R . . 
C21 C 0.1040(3) 0.3007(2) 0.27426(18) 0.0247(13) Uani 1 1 d . . . 
H24 H 0.1218 0.2745 0.2926 0.030 Uiso 1 1 calc R . . 
C20 C 0.1583(3) 0.32742(18) 0.25009(17) 0.0183(12) Uani 1 1 d . . . 
P21 P 0.38084(8) 0.39084(5) 0.22947(5) 0.0215(3) Uani 1 1 d . . . 
C24 C 0.0508(3) 0.3794(2) 0.2218(2) 0.0274(14) Uani 1 1 d . . . 
C23 C -0.0046(3) 0.3509(2) 0.24711(19) 0.0299(14) Uani 1 1 d . . . 
H23 H -0.0607 0.3589 0.2468 0.036 Uiso 1 1 calc R . . 
C22 C 0.0205(3) 0.3123(2) 0.27183(19) 0.0296(14) Uani 1 1 d . . . 
H25 H -0.0183 0.2930 0.2875 0.035 Uiso 1 1 calc R . . 
P22 P 0.24013(7) 0.27982(5) 0.15565(5) 0.0149(3) Uani 1 1 d . . . 
C25 C 0.1351(3) 0.36590(19) 0.22078(18) 0.0198(12) Uani 1 1 d . . . 
C26 C 0.0271(3) 0.41961(19) 0.1946(2) 0.0323(15) Uani 1 1 d . . . 
H26 H -0.0276 0.4304 0.1953 0.039 Uiso 1 1 calc R . . 
C29 C 0.1909(3) 0.38726(17) 0.1892(2) 0.0206(11) Uani 1 1 d . . . 
C28 C 0.1629(3) 0.42594(19) 0.16365(19) 0.0285(14) Uani 1 1 d . . . 
H28 H 0.1990 0.4418 0.1428 0.034 Uiso 1 1 calc R . . 
C27 C 0.0824(3) 0.4423(2) 0.16786(19) 0.0312(14) Uani 1 1 d . . . 
H27 H 0.0666 0.4702 0.1514 0.037 Uiso 1 1 calc R . . 
C49 C 0.2738(3) 0.52816(16) 0.49756(19) 0.0162(10) Uani 1 1 d . . . 
C48 C 0.2916(3) 0.48423(18) 0.51728(18) 0.0210(12) Uani 1 1 d . . . 
H48 H 0.3299 0.4831 0.5423 0.025 Uiso 1 1 calc R . . 
C47 C 0.2749(3) 0.39582(18) 0.52729(19) 0.0301(14) Uani 1 1 d . . . 
H47A H 0.2579 0.3691 0.5075 0.045 Uiso 1 1 calc R . . 
H47B H 0.2453 0.3948 0.5572 0.045 Uiso 1 1 calc R . . 
H47C H 0.3334 0.3937 0.5334 0.045 Uiso 1 1 calc R . . 
C46 C 0.2565(3) 0.44169(17) 0.50247(18) 0.0211(12) Uani 1 1 d . . . 
C45 C 0.2013(3) 0.44460(17) 0.46595(18) 0.0226(12) Uani 1 1 d . . . 
H45 H 0.1754 0.4164 0.4555 0.027 Uiso 1 1 calc R . . 
C44 C 0.1825(3) 0.48681(18) 0.44422(17) 0.0187(12) Uani 1 1 d . . . 
H44 H 0.1446 0.4872 0.4190 0.022 Uiso 1 1 calc R . . 
C43 C 0.2185(3) 0.52868(17) 0.45876(16) 0.0138(11) Uani 1 1 d . . . 
C42 C 0.0686(3) 0.7108(2) 0.40093(19) 0.0358(15) Uani 1 1 d . . . 
H42A H 0.0515 0.6865 0.3784 0.054 Uiso 1 1 calc R . . 
H42B H 0.1281 0.7112 0.4030 0.054 Uiso 1 1 calc R . . 
H42C H 0.0492 0.7419 0.3904 0.054 Uiso 1 1 calc R . . 
C41 C 0.0552(4) 0.73960(19) 0.4832(2) 0.0475(19) Uani 1 1 d . . . 
H41A H 0.1136 0.7385 0.4898 0.071 Uiso 1 1 calc R . . 
H41B H 0.0248 0.7356 0.5125 0.071 Uiso 1 1 calc R . . 
H41C H 0.0414 0.7703 0.4690 0.071 Uiso 1 1 calc R . . 
C40 C 0.0330(3) 0.69964(19) 0.4492(2) 0.0304(14) Uani 1 1 d . . . 
H40 H -0.0275 0.6983 0.4463 0.036 Uiso 1 1 calc R . . 
C39 C -0.0114(3) 0.56693(19) 0.5182(2) 0.0351(15) Uani 1 1 d . . . 
H39A H -0.0105 0.5508 0.4877 0.053 Uiso 1 1 calc R . . 
H39B H -0.0595 0.5568 0.5360 0.053 Uiso 1 1 calc R . . 
H39C H 0.0377 0.5588 0.5359 0.053 Uiso 1 1 calc R . . 
C38 C -0.0163(3) 0.6461(2) 0.55794(18) 0.0432(17) Uani 1 1 d . . . 
H38A H 0.0371 0.6435 0.5729 0.065 Uiso 1 1 calc R . . 
H38B H -0.0575 0.6314 0.5782 0.065 Uiso 1 1 calc R . . 
H38C H -0.0296 0.6797 0.5531 0.065 Uiso 1 1 calc R . . 
C37 C -0.0146(3) 0.6207(2) 0.51058(17) 0.0263(14) Uani 1 1 d . . . 
H37 H -0.0668 0.6281 0.4941 0.032 Uiso 1 1 calc R . . 
C36 C 0.0609(3) 0.60240(18) 0.42165(16) 0.0180(12) Uani 1 1 d . . . 
C35 C -0.0106(3) 0.60002(18) 0.39524(17) 0.0208(12) Uani 1 1 d . . . 
H35 H -0.0571 0.6165 0.4063 0.025 Uiso 1 1 calc R . . 
C34 C -0.0962(3) 0.57297(19) 0.32719(18) 0.0261(13) Uani 1 1 d . . . 
H34A H -0.1122 0.6052 0.3181 0.039 Uiso 1 1 calc R . . 
H34B H -0.1383 0.5592 0.3474 0.039 Uiso 1 1 calc R . . 
H34C H -0.0898 0.5534 0.2990 0.039 Uiso 1 1 calc R . . 
C33 C -0.0168(3) 0.57475(17) 0.35366(17) 0.0197(12) Uani 1 1 d . . . 
C32 C 0.0530(3) 0.55300(19) 0.33735(17) 0.0213(12) Uani 1 1 d . . . 
H32 H 0.0522 0.5372 0.3079 0.026 Uiso 1 1 calc R . . 
C31 C 0.1241(3) 0.55395(18) 0.36343(17) 0.0203(12) Uani 1 1 d . . . 
H31 H 0.1712 0.5387 0.3514 0.024 Uiso 1 1 calc R . . 
C30 C 0.1281(3) 0.57670(18) 0.40668(17) 0.0182(12) Uani 1 1 d . . . 
C53 C 0.3156(3) 0.57169(18) 0.58519(18) 0.0216(13) Uani 1 1 d . . . 
H53 H 0.3564 0.5455 0.5881 0.026 Uiso 1 1 calc R . . 
C52 C 0.4396(3) 0.64613(17) 0.50561(19) 0.0270(13) Uani 1 1 d . . . 
H52A H 0.4911 0.6497 0.4886 0.040 Uiso 1 1 calc R . . 
H52B H 0.4478 0.6539 0.5389 0.040 Uiso 1 1 calc R . . 
H52C H 0.3990 0.6676 0.4921 0.040 Uiso 1 1 calc R . . 
C51 C 0.4714(3) 0.5603(2) 0.5212(2) 0.0350(16) Uani 1 1 d . . . 
H51A H 0.4519 0.5276 0.5177 0.052 Uiso 1 1 calc R . . 
H51B H 0.4796 0.5673 0.5546 0.052 Uiso 1 1 calc R . . 
H51C H 0.5230 0.5640 0.5044 0.052 Uiso 1 1 calc R . . 
C50 C 0.4095(3) 0.59403(16) 0.5011(2) 0.0221(12) Uani 1 1 d . . . 
H50 H 0.4079 0.5872 0.4666 0.027 Uiso 1 1 calc R . . 
C54 C 0.2363(3) 0.5547(2) 0.60825(18) 0.0286(14) Uani 1 1 d . . . 
H54A H 0.1979 0.5812 0.6101 0.043 Uiso 1 1 calc R . . 
H54B H 0.2479 0.5429 0.6400 0.043 Uiso 1 1 calc R . . 
H54C H 0.2126 0.5291 0.5894 0.043 Uiso 1 1 calc R . . 
C55 C 0.3485(3) 0.61461(19) 0.61175(19) 0.0293(14) Uani 1 1 d . . . 
H55A H 0.4041 0.6213 0.6013 0.044 Uiso 1 1 calc R . . 
H55B H 0.3485 0.6079 0.6456 0.044 Uiso 1 1 calc R . . 
H55C H 0.3140 0.6422 0.6054 0.044 Uiso 1 1 calc R . . 
C57 C 0.2485(3) 0.24254(17) 0.20851(17) 0.0150(11) Uani 1 1 d . . . 
C56 C 0.2615(3) 0.26555(17) 0.25122(19) 0.0184(12) Uani 1 1 d . . . 
C58 C 0.2492(3) 0.19307(19) 0.20776(19) 0.0216(12) Uani 1 1 d . . . 
H58 H 0.2390 0.1773 0.1788 0.026 Uiso 1 1 calc R . . 
C59 C 0.2642(3) 0.16587(18) 0.2479(2) 0.0244(13) Uani 1 1 d . . . 
C61 C 0.2837(3) 0.1897(2) 0.2889(2) 0.0274(14) Uani 1 1 d . . . 
H61 H 0.2984 0.1721 0.3161 0.033 Uiso 1 1 calc R . . 
C60 C 0.2605(3) 0.11236(17) 0.2469(2) 0.0320(14) Uani 1 1 d . . . 
H60A H 0.2217 0.1021 0.2229 0.048 Uiso 1 1 calc R . . 
H60B H 0.2430 0.1006 0.2777 0.048 Uiso 1 1 calc R . . 
H60C H 0.3145 0.0996 0.2396 0.048 Uiso 1 1 calc R . . 
C62 C 0.2821(3) 0.2391(2) 0.29090(19) 0.0238(13) Uani 1 1 d . . . 
H62 H 0.2951 0.2548 0.3195 0.029 Uiso 1 1 calc R . . 
C63 C 0.1301(3) 0.27608(18) 0.14018(17) 0.0192(12) Uani 1 1 d . . . 
H63 H 0.0998 0.2824 0.1700 0.023 Uiso 1 1 calc R . . 
C66 C 0.2929(3) 0.24618(18) 0.10993(17) 0.0159(11) Uani 1 1 d . . . 
H66 H 0.2641 0.2152 0.1060 0.019 Uiso 1 1 calc R . . 
C65 C 0.1037(3) 0.31472(19) 0.10576(18) 0.0259(13) Uani 1 1 d . . . 
H65A H 0.1209 0.3061 0.0739 0.039 Uiso 1 1 calc R . . 
H65B H 0.1288 0.3450 0.1147 0.039 Uiso 1 1 calc R . . 
H65C H 0.0444 0.3179 0.1066 0.039 Uiso 1 1 calc R . . 
C64 C 0.1036(3) 0.22690(17) 0.12418(18) 0.0231(12) Uani 1 1 d . . . 
H64A H 0.0447 0.2267 0.1191 0.035 Uiso 1 1 calc R . . 
H64B H 0.1176 0.2035 0.1484 0.035 Uiso 1 1 calc R . . 
H64C H 0.1314 0.2188 0.0948 0.035 Uiso 1 1 calc R . . 
C68 C 0.3809(3) 0.23572(18) 0.12310(18) 0.0238(13) Uani 1 1 d . . . 
H68A H 0.4065 0.2171 0.0981 0.036 Uiso 1 1 calc R . . 
H68B H 0.3823 0.2177 0.1526 0.036 Uiso 1 1 calc R . . 
H68C H 0.4104 0.2657 0.1271 0.036 Uiso 1 1 calc R . . 
C67 C 0.2900(3) 0.2725(2) 0.06274(18) 0.0309(14) Uani 1 1 d . . . 
H67A H 0.3250 0.2562 0.0400 0.046 Uiso 1 1 calc R . . 
H67B H 0.3092 0.3051 0.0671 0.046 Uiso 1 1 calc R . . 
H67C H 0.2340 0.2729 0.0510 0.046 Uiso 1 1 calc R . . 
C70 C 0.2838(3) 0.34246(19) 0.29398(17) 0.0206(12) Uani 1 1 d . . . 
C69 C 0.3474(3) 0.3738(2) 0.28825(19) 0.0246(14) Uani 1 1 d . . . 
C74 C 0.3820(3) 0.3939(2) 0.3284(2) 0.0348(16) Uani 1 1 d . . . 
H74 H 0.4256 0.4156 0.3245 0.042 Uiso 1 1 calc R . . 
C73 C 0.3563(3) 0.3839(2) 0.3737(2) 0.0379(16) Uani 1 1 d . . . 
C72 C 0.2898(3) 0.3534(2) 0.3777(2) 0.0382(16) Uani 1 1 d . . . 
H72 H 0.2692 0.3460 0.4080 0.046 Uiso 1 1 calc R . . 
C71 C 0.2535(3) 0.3338(2) 0.33880(19) 0.0284(14) Uani 1 1 d . . . 
H71 H 0.2071 0.3141 0.3426 0.034 Uiso 1 1 calc R . . 
C75 C 0.3980(4) 0.4054(3) 0.4158(2) 0.060(2) Uani 1 1 d . . . 
H75A H 0.4564 0.4079 0.4097 0.091 Uiso 1 1 calc R . . 
H75B H 0.3889 0.3852 0.4434 0.091 Uiso 1 1 calc R . . 
H75C H 0.3757 0.4371 0.4218 0.091 Uiso 1 1 calc R . . 
C79 C 0.4908(3) 0.3766(2) 0.23188(18) 0.0227(13) Uani 1 1 d . . . 
H79 H 0.5162 0.3976 0.2561 0.027 Uiso 1 1 calc R . . 
C78 C 0.3836(4) 0.4761(2) 0.1812(3) 0.066(2) Uani 1 1 d . . . 
H78A H 0.4374 0.4694 0.1681 0.099 Uiso 1 1 calc R . . 
H78B H 0.3747 0.5105 0.1819 0.099 Uiso 1 1 calc R . . 
H78C H 0.3419 0.4611 0.1617 0.099 Uiso 1 1 calc R . . 
C77 C 0.3024(4) 0.4757(2) 0.2555(3) 0.065(2) Uani 1 1 d . . . 
H77A H 0.3011 0.5103 0.2525 0.098 Uiso 1 1 calc R . . 
H77B H 0.3032 0.4670 0.2888 0.098 Uiso 1 1 calc R . . 
H77C H 0.2540 0.4621 0.2405 0.098 Uiso 1 1 calc R . . 
C76 C 0.3785(4) 0.4564(2) 0.2314(2) 0.0447(18) Uani 1 1 d . . . 
H76 H 0.4272 0.4676 0.2493 0.054 Uiso 1 1 calc R . . 
C80 C 0.5065(3) 0.32535(19) 0.24635(19) 0.0270(14) Uani 1 1 d . . . 
H80A H 0.4893 0.3040 0.2210 0.041 Uiso 1 1 calc R . . 
H80B H 0.4758 0.3181 0.2750 0.041 Uiso 1 1 calc R . . 
H80C H 0.5647 0.3209 0.2523 0.041 Uiso 1 1 calc R . . 
C81 C 0.5326(3) 0.38640(19) 0.1849(2) 0.0333(13) Uani 1 1 d . . . 
H81A H 0.5071 0.3672 0.1603 0.050 Uiso 1 1 calc R . . 
H81B H 0.5903 0.3781 0.1873 0.050 Uiso 1 1 calc R . . 
H81C H 0.5272 0.4201 0.1772 0.050 Uiso 1 1 calc R . . 
 
loop_ 
 _atom_site_aniso_label 
 _atom_site_aniso_U_11 
 _atom_site_aniso_U_22 
 _atom_site_aniso_U_33 
 _atom_site_aniso_U_23 
 _atom_site_aniso_U_13 
 _atom_site_aniso_U_12 
Ir1 0.01454(9) 0.01726(11) 0.01722(11) -0.00129(10) -0.00128(13) 0.00284(9) 
N1 0.011(2) 0.022(2) 0.013(2) 0.0031(18) -0.0010(19) 0.0003(19) 
Ir2 0.01230(9) 0.01643(10) 0.01748(10) -0.00124(10) -0.00166(13) -0.00055(8) 
N2 0.015(2) 0.021(2) 0.013(2) -0.005(2) -0.0009(18) -0.003(2) 
C10 0.012(3) 0.028(3) 0.013(3) 0.000(2) -0.002(2) 0.000(2) 
C11 0.020(3) 0.019(3) 0.025(3) -0.003(2) 0.001(2) 0.002(2) 
P11 0.0151(7) 0.0170(7) 0.0168(7) 0.0023(6) -0.0008(6) 0.0014(6) 
C12 0.017(3) 0.049(4) 0.020(3) -0.006(3) 0.005(2) 0.002(3) 
P12 0.0148(7) 0.0275(9) 0.0221(8) -0.0041(6) -0.0011(6) 0.0046(6) 
C13 0.014(3) 0.043(4) 0.025(3) 0.006(3) 0.004(2) -0.002(3) 
C14 0.015(3) 0.026(3) 0.021(3) 0.005(3) -0.001(2) -0.008(2) 
C15 0.019(3) 0.021(3) 0.011(3) 0.004(2) -0.007(2) 0.000(2) 
C16 0.022(3) 0.040(4) 0.033(3) 0.015(3) -0.007(3) -0.006(3) 
C18 0.023(3) 0.017(3) 0.030(3) 0.001(3) -0.011(3) -0.001(2) 
C19 0.017(3) 0.022(3) 0.018(3) -0.005(2) -0.014(2) 0.005(2) 
C17 0.029(3) 0.025(3) 0.042(4) 0.011(3) -0.017(3) -0.013(3) 
C21 0.022(3) 0.030(3) 0.022(3) 0.000(3) 0.009(2) 0.001(3) 
C20 0.013(2) 0.026(3) 0.016(3) -0.007(2) -0.002(2) 0.003(2) 
P21 0.0160(7) 0.0187(8) 0.0298(8) -0.0041(7) -0.0051(6) 0.0014(6) 
C24 0.013(3) 0.035(4) 0.034(3) -0.006(3) 0.000(2) 0.003(2) 
C23 0.013(3) 0.042(4) 0.035(3) -0.014(3) 0.000(3) -0.001(3) 
C22 0.019(3) 0.038(4) 0.032(4) -0.005(3) 0.009(3) -0.003(3) 
P22 0.0116(6) 0.0172(7) 0.0159(7) -0.0004(6) -0.0001(6) -0.0001(6) 
C25 0.015(3) 0.022(3) 0.022(3) -0.010(2) -0.004(2) 0.001(2) 
C26 0.020(3) 0.031(3) 0.046(4) -0.010(3) -0.009(3) 0.009(2) 
C29 0.023(3) 0.023(3) 0.016(3) -0.004(3) -0.012(3) -0.007(2) 
C28 0.026(3) 0.032(4) 0.029(3) 0.002(3) -0.013(3) 0.004(3) 
C27 0.028(3) 0.031(3) 0.035(4) -0.001(3) -0.011(3) 0.005(3) 
C49 0.012(2) 0.019(3) 0.018(3) 0.003(3) 0.003(2) 0.0001(19) 
C48 0.017(3) 0.023(3) 0.022(3) -0.002(2) 0.003(2) 0.005(2) 
C47 0.041(4) 0.021(3) 0.028(3) 0.008(3) 0.007(3) 0.004(3) 
C46 0.024(3) 0.019(3) 0.020(3) 0.003(3) 0.011(3) 0.004(2) 
C45 0.022(3) 0.012(3) 0.034(3) -0.002(2) 0.005(3) -0.006(2) 
C44 0.012(3) 0.022(3) 0.022(3) 0.000(2) 0.003(2) -0.005(2) 
C43 0.012(3) 0.017(3) 0.013(3) 0.000(2) 0.007(2) 0.002(2) 
C42 0.039(4) 0.027(4) 0.041(4) 0.012(3) -0.014(3) 0.002(3) 
C41 0.061(4) 0.026(4) 0.056(5) -0.010(3) -0.008(3) 0.020(3) 
C40 0.027(3) 0.025(3) 0.039(4) -0.001(3) -0.004(3) 0.015(3) 
C39 0.019(3) 0.045(4) 0.041(4) 0.012(3) -0.001(3) -0.012(3) 
C38 0.022(3) 0.079(5) 0.028(3) -0.016(3) 0.009(3) -0.006(3) 
C37 0.010(2) 0.049(4) 0.020(3) -0.003(3) -0.003(2) 0.001(2) 
C36 0.019(3) 0.022(3) 0.013(3) -0.001(2) -0.001(2) 0.004(2) 
C35 0.015(3) 0.023(3) 0.024(3) 0.000(2) 0.000(2) 0.003(2) 
C34 0.024(3) 0.029(4) 0.025(3) 0.007(3) -0.007(3) -0.004(3) 
C33 0.023(3) 0.017(3) 0.019(3) 0.008(2) -0.004(2) -0.002(2) 
C32 0.026(3) 0.023(3) 0.016(3) 0.001(2) -0.003(2) -0.002(2) 
C31 0.016(3) 0.025(3) 0.020(3) 0.001(2) 0.003(2) 0.000(2) 
C30 0.017(3) 0.017(3) 0.020(3) 0.007(2) -0.003(2) -0.002(2) 
C53 0.019(3) 0.018(3) 0.027(3) -0.003(2) 0.002(2) 0.004(2) 
C52 0.019(3) 0.024(3) 0.037(4) 0.011(3) -0.001(3) -0.002(2) 
C51 0.013(3) 0.031(4) 0.062(4) 0.012(3) 0.006(3) 0.007(3) 
C50 0.025(3) 0.015(3) 0.027(3) 0.000(3) 0.002(3) 0.003(2) 
C54 0.031(3) 0.037(4) 0.017(3) 0.004(3) 0.000(3) -0.001(3) 
C55 0.033(3) 0.031(4) 0.024(3) 0.000(3) 0.002(3) 0.001(3) 
C57 0.008(2) 0.017(3) 0.020(3) 0.000(2) 0.001(2) 0.001(2) 
C56 0.009(3) 0.021(3) 0.026(3) 0.000(3) 0.006(2) 0.001(2) 
C58 0.008(2) 0.029(3) 0.028(3) 0.001(3) 0.002(2) 0.001(2) 
C59 0.015(3) 0.024(3) 0.034(3) 0.005(3) 0.008(3) 0.006(2) 
C61 0.024(3) 0.033(4) 0.025(3) 0.009(3) 0.006(3) 0.008(3) 
C60 0.031(3) 0.028(3) 0.038(3) 0.011(3) 0.001(3) -0.001(3) 
C62 0.021(3) 0.031(4) 0.020(3) 0.000(3) 0.005(2) 0.003(2) 
C63 0.011(3) 0.023(3) 0.023(3) 0.001(2) 0.001(2) -0.001(2) 
C66 0.012(2) 0.015(3) 0.020(3) -0.005(2) -0.001(2) -0.002(2) 
C65 0.017(3) 0.030(3) 0.031(3) 0.009(3) -0.010(3) 0.003(3) 
C64 0.012(3) 0.022(3) 0.036(3) -0.005(3) 0.000(2) -0.003(2) 
C68 0.015(3) 0.027(3) 0.029(3) -0.008(3) 0.003(2) -0.001(2) 
C67 0.035(3) 0.038(4) 0.019(3) 0.001(3) 0.007(3) 0.002(3) 
C70 0.021(3) 0.025(3) 0.016(3) -0.008(2) -0.006(2) 0.013(2) 
C69 0.018(3) 0.030(3) 0.025(3) -0.018(3) 0.001(3) 0.006(3) 
C74 0.016(3) 0.058(5) 0.030(4) -0.016(3) 0.001(3) 0.002(3) 
C73 0.024(3) 0.066(5) 0.024(3) -0.023(3) -0.006(3) 0.013(3) 
C72 0.027(3) 0.071(5) 0.016(3) -0.011(3) 0.001(3) 0.017(3) 
C71 0.022(3) 0.039(4) 0.024(3) -0.003(3) 0.000(3) 0.009(3) 
C75 0.026(4) 0.120(7) 0.036(4) -0.037(4) 0.001(3) 0.003(4) 
C79 0.015(3) 0.028(3) 0.025(3) -0.005(3) -0.004(2) -0.004(2) 
C78 0.042(4) 0.031(4) 0.125(7) 0.042(5) -0.032(5) -0.014(3) 
C77 0.072(5) 0.035(4) 0.089(6) -0.035(4) -0.034(5) 0.028(4) 
C76 0.040(4) 0.025(4) 0.069(5) -0.005(3) -0.031(4) -0.003(3) 
C80 0.012(3) 0.032(3) 0.037(4) -0.002(3) -0.005(3) 0.005(2) 
C81 0.026(3) 0.042(4) 0.032(3) 0.000(3) 0.008(3) 0.003(3) 
 
_geom_special_details 
; 
 All esds (except the esd in the dihedral angle between two l.s. planes) 
 are estimated using the full covariance matrix.  The cell esds are taken 
 into account individually in the estimation of esds in distances, angles 
 and torsion angles; correlations between esds in cell parameters are only 
 used when they are defined by crystal symmetry.  An approximate (isotropic) 
 treatment of cell esds is used for estimating esds involving l.s. planes. 
; 
 
loop_ 
 _geom_bond_atom_site_label_1 
 _geom_bond_atom_site_label_2 
 _geom_bond_distance 
 _geom_bond_site_symmetry_2 
 _geom_bond_publ_flag 
Ir1 C19 2.101(6) . ? 
Ir1 P12 2.2368(14) . ? 
Ir1 N1 2.270(4) . ? 
Ir1 P11 2.2751(13) . ? 
Ir1 H1 1.30(5) . ? 
Ir1 H2 1.40(5) . ? 
N1 C43 1.470(6) . ? 
N1 C30 1.495(6) . ? 
N1 C10 1.495(6) . ? 
Ir2 C29 2.108(5) . ? 
Ir2 P21 2.2266(14) . ? 
Ir2 N2 2.257(4) . ? 
Ir2 P22 2.2832(13) . ? 
Ir2 H3 1.34(5) . ? 
N2 C56 1.482(6) . ? 
N2 C70 1.495(6) . ? 
N2 C20 1.506(6) . ? 
C10 C11 1.364(7) . ? 
C10 C15 1.431(7) . ? 
C11 C12 1.419(7) . ? 
C11 H14 0.9500 . ? 
P11 C49 1.826(5) . ? 
P11 C53 1.838(5) . ? 
P11 C50 1.852(5) . ? 
C12 C13 1.359(7) . ? 
C12 H15 0.9500 . ? 
P12 C36 1.829(5) . ? 
P12 C37 1.854(5) . ? 
P12 C40 1.857(5) . ? 
C13 C14 1.411(7) . ? 
C13 H13 0.9500 . ? 
C14 C16 1.402(7) . ? 
C14 C15 1.439(7) . ? 
C15 C19 1.416(7) . ? 
C16 C17 1.376(8) . ? 
C16 H16 0.9500 . ? 
C18 C19 1.392(7) . ? 
C18 C17 1.406(7) . ? 
C18 H18 0.9500 . ? 
C17 H17 0.9500 . ? 
C21 C20 1.355(7) . ? 
C21 C22 1.413(7) . ? 
C21 H24 0.9500 . ? 
C20 C25 1.419(7) . ? 
P21 C69 1.824(6) . ? 
P21 C76 1.847(6) . ? 
P21 C79 1.854(5) . ? 
C24 C23 1.410(7) . ? 
C24 C26 1.427(7) . ? 
C24 C25 1.440(7) . ? 
C23 C22 1.360(8) . ? 
C23 H23 0.9500 . ? 
C22 H25 0.9500 . ? 
P22 C66 1.828(5) . ? 
P22 C57 1.839(5) . ? 
P22 C63 1.866(5) . ? 
C25 C29 1.419(7) . ? 
C26 C27 1.348(7) . ? 
C26 H26 0.9500 . ? 
C29 C28 1.388(7) . ? 
C28 C27 1.408(7) . ? 
C28 H28 0.9500 . ? 
C27 H27 0.9500 . ? 
C49 C48 1.390(6) . ? 
C49 C43 1.430(7) . ? 
C48 C46 1.396(7) . ? 
C48 H48 0.9500 . ? 
C47 C46 1.503(7) . ? 
C47 H47A 0.9800 . ? 
C47 H47B 0.9800 . ? 
C47 H47C 0.9800 . ? 
C46 C45 1.382(7) . ? 
C45 C44 1.375(7) . ? 
C45 H45 0.9500 . ? 
C44 C43 1.383(7) . ? 
C44 H44 0.9500 . ? 
C42 C40 1.525(7) . ? 
C42 H42A 0.9800 . ? 
C42 H42B 0.9800 . ? 
C42 H42C 0.9800 . ? 
C41 C40 1.528(7) . ? 
C41 H41A 0.9800 . ? 
C41 H41B 0.9800 . ? 
C41 H41C 0.9800 . ? 
C40 H40 1.0000 . ? 
C39 C37 1.532(7) . ? 
C39 H39A 0.9800 . ? 
C39 H39B 0.9800 . ? 
C39 H39C 0.9800 . ? 
C38 C37 1.525(7) . ? 
C38 H38A 0.9800 . ? 
C38 H38B 0.9800 . ? 
C38 H38C 0.9800 . ? 
C37 H37 1.0000 . ? 
C36 C30 1.389(6) . ? 
C36 C35 1.397(6) . ? 
C35 C33 1.384(7) . ? 
C35 H35 0.9500 . ? 
C34 C33 1.509(6) . ? 
C34 H34A 0.9800 . ? 
C34 H34B 0.9800 . ? 
C34 H34C 0.9800 . ? 
C33 C32 1.381(7) . ? 
C32 C31 1.385(7) . ? 
C32 H32 0.9500 . ? 
C31 C30 1.389(7) . ? 
C31 H31 0.9500 . ? 
C53 C55 1.525(7) . ? 
C53 C54 1.536(7) . ? 
C53 H53 1.0000 . ? 
C52 C50 1.555(6) . ? 
C52 H52A 0.9800 . ? 
C52 H52B 0.9800 . ? 
C52 H52C 0.9800 . ? 
C51 C50 1.506(6) . ? 
C51 H51A 0.9800 . ? 
C51 H51B 0.9800 . ? 
C51 H51C 0.9800 . ? 
C50 H50 1.0000 . ? 
C54 H54A 0.9800 . ? 
C54 H54B 0.9800 . ? 
C54 H54C 0.9800 . ? 
C55 H55A 0.9800 . ? 
C55 H55B 0.9800 . ? 
C55 H55C 0.9800 . ? 
C57 C56 1.393(7) . ? 
C57 C58 1.394(7) . ? 
C56 C62 1.395(7) . ? 
C58 C59 1.396(7) . ? 
C58 H58 0.9500 . ? 
C59 C61 1.384(8) . ? 
C59 C60 1.509(7) . ? 
C61 C62 1.392(7) . ? 
C61 H61 0.9500 . ? 
C60 H60A 0.9800 . ? 
C60 H60B 0.9800 . ? 
C60 H60C 0.9800 . ? 
C62 H62 0.9500 . ? 
C63 C64 1.522(6) . ? 
C63 C65 1.527(6) . ? 
C63 H63 1.0000 . ? 
C66 C68 1.525(6) . ? 
C66 C67 1.534(7) . ? 
C66 H66 1.0000 . ? 
C65 H65A 0.9800 . ? 
C65 H65B 0.9800 . ? 
C65 H65C 0.9800 . ? 
C64 H64A 0.9800 . ? 
C64 H64B 0.9800 . ? 
C64 H64C 0.9800 . ? 
C68 H68A 0.9800 . ? 
C68 H68B 0.9800 . ? 
C68 H68C 0.9800 . ? 
C67 H67A 0.9800 . ? 
C67 H67B 0.9800 . ? 
C67 H67C 0.9800 . ? 
C70 C69 1.380(7) . ? 
C70 C71 1.390(7) . ? 
C69 C74 1.397(7) . ? 
C74 C73 1.384(8) . ? 
C74 H74 0.9500 . ? 
C73 C72 1.396(8) . ? 
C73 C75 1.507(7) . ? 
C72 C71 1.371(7) . ? 
C72 H72 0.9500 . ? 
C71 H71 0.9500 . ? 
C75 H75A 0.9800 . ? 
C75 H75B 0.9800 . ? 
C75 H75C 0.9800 . ? 
C79 C80 1.523(7) . ? 
C79 C81 1.527(7) . ? 
C79 H79 1.0000 . ? 
C78 C76 1.534(9) . ? 
C78 H78A 0.9800 . ? 
C78 H78B 0.9800 . ? 
C78 H78C 0.9800 . ? 
C77 C76 1.528(9) . ? 
C77 H77A 0.9800 . ? 
C77 H77B 0.9800 . ? 
C77 H77C 0.9800 . ? 
C76 H76 1.0000 . ? 
C80 H80A 0.9800 . ? 
C80 H80B 0.9800 . ? 
C80 H80C 0.9800 . ? 
C81 H81A 0.9800 . ? 
C81 H81B 0.9800 . ? 
C81 H81C 0.9800 . ? 
 
loop_ 
 _geom_angle_atom_site_label_1 
 _geom_angle_atom_site_label_2 
 _geom_angle_atom_site_label_3 
 _geom_angle 
 _geom_angle_site_symmetry_1 
 _geom_angle_site_symmetry_3 
 _geom_angle_publ_flag 
C19 Ir1 P12 100.58(13) . . ? 
C19 Ir1 N1 79.61(16) . . ? 
P12 Ir1 N1 86.05(10) . . ? 
C19 Ir1 P11 97.47(13) . . ? 
P12 Ir1 P11 155.95(5) . . ? 
N1 Ir1 P11 81.69(10) . . ? 
C19 Ir1 H1 166.7(19) . . ? 
P12 Ir1 H1 87.1(19) . . ? 
N1 Ir1 H1 90.1(19) . . ? 
P11 Ir1 H1 72.4(19) . . ? 
C19 Ir1 H2 94.6(18) . . ? 
P12 Ir1 H2 92.4(18) . . ? 
N1 Ir1 H2 173.6(19) . . ? 
P11 Ir1 H2 101.9(18) . . ? 
H1 Ir1 H2 96(3) . . ? 
C43 N1 C30 114.8(4) . . ? 
C43 N1 C10 109.8(4) . . ? 
C30 N1 C10 109.1(4) . . ? 
C43 N1 Ir1 106.2(3) . . ? 
C30 N1 Ir1 111.2(3) . . ? 
C10 N1 Ir1 105.3(3) . . ? 
C29 Ir2 P21 100.35(13) . . ? 
C29 Ir2 N2 80.52(19) . . ? 
P21 Ir2 N2 86.58(11) . . ? 
C29 Ir2 P22 96.37(13) . . ? 
P21 Ir2 P22 157.29(5) . . ? 
N2 Ir2 P22 81.11(11) . . ? 
C29 Ir2 H3 98.1(19) . . ? 
P21 Ir2 H3 100.8(19) . . ? 
N2 Ir2 H3 172.6(19) . . ? 
P22 Ir2 H3 91.8(19) . . ? 
C56 N2 C70 115.0(4) . . ? 
C56 N2 C20 109.1(4) . . ? 
C70 N2 C20 109.4(4) . . ? 
C56 N2 Ir2 107.0(3) . . ? 
C70 N2 Ir2 110.9(3) . . ? 
C20 N2 Ir2 104.9(3) . . ? 
C11 C10 C15 123.4(5) . . ? 
C11 C10 N1 121.6(5) . . ? 
C15 C10 N1 115.1(4) . . ? 
C10 C11 C12 118.9(5) . . ? 
C10 C11 H14 120.6 . . ? 
C12 C11 H14 120.6 . . ? 
C49 P11 C53 102.7(2) . . ? 
C49 P11 C50 104.3(2) . . ? 
C53 P11 C50 104.4(2) . . ? 
C49 P11 Ir1 97.81(15) . . ? 
C53 P11 Ir1 121.25(17) . . ? 
C50 P11 Ir1 122.73(17) . . ? 
C13 C12 C11 120.0(5) . . ? 
C13 C12 H15 120.0 . . ? 
C11 C12 H15 120.0 . . ? 
C36 P12 C37 102.1(2) . . ? 
C36 P12 C40 103.1(2) . . ? 
C37 P12 C40 104.5(2) . . ? 
C36 P12 Ir1 101.74(16) . . ? 
C37 P12 Ir1 118.66(17) . . ? 
C40 P12 Ir1 123.42(19) . . ? 
C12 C13 C14 122.1(5) . . ? 
C12 C13 H13 118.9 . . ? 
C14 C13 H13 118.9 . . ? 
C16 C14 C13 123.1(5) . . ? 
C16 C14 C15 117.5(5) . . ? 
C13 C14 C15 119.3(5) . . ? 
C19 C15 C10 120.6(5) . . ? 
C19 C15 C14 123.3(5) . . ? 
C10 C15 C14 116.0(5) . . ? 
C17 C16 C14 119.9(5) . . ? 
C17 C16 H16 120.0 . . ? 
C14 C16 H16 120.0 . . ? 
C19 C18 C17 122.6(5) . . ? 
C19 C18 H18 118.7 . . ? 
C17 C18 H18 118.7 . . ? 
C18 C19 C15 115.1(5) . . ? 
C18 C19 Ir1 132.4(4) . . ? 
C15 C19 Ir1 111.9(4) . . ? 
C16 C17 C18 121.1(5) . . ? 
C16 C17 H17 119.5 . . ? 
C18 C17 H17 119.5 . . ? 
C20 C21 C22 119.2(5) . . ? 
C20 C21 H24 120.4 . . ? 
C22 C21 H24 120.4 . . ? 
C21 C20 C25 123.0(5) . . ? 
C21 C20 N2 121.6(5) . . ? 
C25 C20 N2 115.4(4) . . ? 
C69 P21 C76 103.2(3) . . ? 
C69 P21 C79 101.7(2) . . ? 
C76 P21 C79 103.6(3) . . ? 
C69 P21 Ir2 101.31(18) . . ? 
C76 P21 Ir2 123.86(19) . . ? 
C79 P21 Ir2 119.51(18) . . ? 
C23 C24 C26 123.5(5) . . ? 
C23 C24 C25 118.9(5) . . ? 
C26 C24 C25 117.5(5) . . ? 
C22 C23 C24 121.5(5) . . ? 
C22 C23 H23 119.3 . . ? 
C24 C23 H23 119.3 . . ? 
C23 C22 C21 120.3(5) . . ? 
C23 C22 H25 119.8 . . ? 
C21 C22 H25 119.8 . . ? 
C66 P22 C57 104.5(2) . . ? 
C66 P22 C63 105.3(2) . . ? 
C57 P22 C63 103.5(2) . . ? 
C66 P22 Ir2 119.17(16) . . ? 
C57 P22 Ir2 98.45(16) . . ? 
C63 P22 Ir2 122.86(17) . . ? 
C29 C25 C20 121.5(4) . . ? 
C29 C25 C24 121.7(5) . . ? 
C20 C25 C24 116.6(5) . . ? 
C27 C26 C24 119.9(5) . . ? 
C27 C26 H26 120.0 . . ? 
C24 C26 H26 120.0 . . ? 
C28 C29 C25 116.7(5) . . ? 
C28 C29 Ir2 132.0(4) . . ? 
C25 C29 Ir2 110.8(4) . . ? 
C29 C28 C27 121.7(5) . . ? 
C29 C28 H28 119.1 . . ? 
C27 C28 H28 119.1 . . ? 
C26 C27 C28 121.8(5) . . ? 
C26 C27 H27 119.1 . . ? 
C28 C27 H27 119.1 . . ? 
C48 C49 C43 117.0(4) . . ? 
C48 C49 P11 124.9(4) . . ? 
C43 C49 P11 117.5(3) . . ? 
C49 C48 C46 123.8(5) . . ? 
C49 C48 H48 118.1 . . ? 
C46 C48 H48 118.1 . . ? 
C46 C47 H47A 109.5 . . ? 
C46 C47 H47B 109.5 . . ? 
H47A C47 H47B 109.5 . . ? 
C46 C47 H47C 109.5 . . ? 
H47A C47 H47C 109.5 . . ? 
H47B C47 H47C 109.5 . . ? 
C45 C46 C48 116.6(5) . . ? 
C45 C46 C47 122.4(5) . . ? 
C48 C46 C47 120.9(5) . . ? 
C44 C45 C46 122.5(5) . . ? 
C44 C45 H45 118.8 . . ? 
C46 C45 H45 118.8 . . ? 
C45 C44 C43 120.4(5) . . ? 
C45 C44 H44 119.8 . . ? 
C43 C44 H44 119.8 . . ? 
C44 C43 C49 119.6(4) . . ? 
C44 C43 N1 123.4(4) . . ? 
C49 C43 N1 117.0(4) . . ? 
C40 C42 H42A 109.5 . . ? 
C40 C42 H42B 109.5 . . ? 
H42A C42 H42B 109.5 . . ? 
C40 C42 H42C 109.5 . . ? 
H42A C42 H42C 109.5 . . ? 
H42B C42 H42C 109.5 . . ? 
C40 C41 H41A 109.5 . . ? 
C40 C41 H41B 109.5 . . ? 
H41A C41 H41B 109.5 . . ? 
C40 C41 H41C 109.5 . . ? 
H41A C41 H41C 109.5 . . ? 
H41B C41 H41C 109.5 . . ? 
C42 C40 C41 109.0(5) . . ? 
C42 C40 P12 112.2(4) . . ? 
C41 C40 P12 110.0(4) . . ? 
C42 C40 H40 108.5 . . ? 
C41 C40 H40 108.5 . . ? 
P12 C40 H40 108.5 . . ? 
C37 C39 H39A 109.5 . . ? 
C37 C39 H39B 109.5 . . ? 
H39A C39 H39B 109.5 . . ? 
C37 C39 H39C 109.5 . . ? 
H39A C39 H39C 109.5 . . ? 
H39B C39 H39C 109.5 . . ? 
C37 C38 H38A 109.5 . . ? 
C37 C38 H38B 109.5 . . ? 
H38A C38 H38B 109.5 . . ? 
C37 C38 H38C 109.5 . . ? 
H38A C38 H38C 109.5 . . ? 
H38B C38 H38C 109.5 . . ? 
C38 C37 C39 109.8(5) . . ? 
C38 C37 P12 112.3(4) . . ? 
C39 C37 P12 112.0(4) . . ? 
C38 C37 H37 107.5 . . ? 
C39 C37 H37 107.5 . . ? 
P12 C37 H37 107.5 . . ? 
C30 C36 C35 118.7(5) . . ? 
C30 C36 P12 119.9(4) . . ? 
C35 C36 P12 121.2(4) . . ? 
C33 C35 C36 123.1(5) . . ? 
C33 C35 H35 118.4 . . ? 
C36 C35 H35 118.4 . . ? 
C33 C34 H34A 109.5 . . ? 
C33 C34 H34B 109.5 . . ? 
H34A C34 H34B 109.5 . . ? 
C33 C34 H34C 109.5 . . ? 
H34A C34 H34C 109.5 . . ? 
H34B C34 H34C 109.5 . . ? 
C32 C33 C35 117.0(5) . . ? 
C32 C33 C34 122.5(5) . . ? 
C35 C33 C34 120.5(5) . . ? 
C33 C32 C31 120.9(5) . . ? 
C33 C32 H32 119.6 . . ? 
C31 C32 H32 119.6 . . ? 
C32 C31 C30 121.6(5) . . ? 
C32 C31 H31 119.2 . . ? 
C30 C31 H31 119.2 . . ? 
C31 C30 C36 118.3(5) . . ? 
C31 C30 N1 121.5(4) . . ? 
C36 C30 N1 120.1(4) . . ? 
C55 C53 C54 109.7(4) . . ? 
C55 C53 P11 110.7(4) . . ? 
C54 C53 P11 113.1(4) . . ? 
C55 C53 H53 107.7 . . ? 
C54 C53 H53 107.7 . . ? 
P11 C53 H53 107.7 . . ? 
C50 C52 H52A 109.5 . . ? 
C50 C52 H52B 109.5 . . ? 
H52A C52 H52B 109.5 . . ? 
C50 C52 H52C 109.5 . . ? 
H52A C52 H52C 109.5 . . ? 
H52B C52 H52C 109.5 . . ? 
C50 C51 H51A 109.5 . . ? 
C50 C51 H51B 109.5 . . ? 
H51A C51 H51B 109.5 . . ? 
C50 C51 H51C 109.5 . . ? 
H51A C51 H51C 109.5 . . ? 
H51B C51 H51C 109.5 . . ? 
C51 C50 C52 110.4(4) . . ? 
C51 C50 P11 115.2(4) . . ? 
C52 C50 P11 113.5(3) . . ? 
C51 C50 H50 105.6 . . ? 
C52 C50 H50 105.6 . . ? 
P11 C50 H50 105.6 . . ? 
C53 C54 H54A 109.5 . . ? 
C53 C54 H54B 109.5 . . ? 
H54A C54 H54B 109.5 . . ? 
C53 C54 H54C 109.5 . . ? 
H54A C54 H54C 109.5 . . ? 
H54B C54 H54C 109.5 . . ? 
C53 C55 H55A 109.5 . . ? 
C53 C55 H55B 109.5 . . ? 
H55A C55 H55B 109.5 . . ? 
C53 C55 H55C 109.5 . . ? 
H55A C55 H55C 109.5 . . ? 
H55B C55 H55C 109.5 . . ? 
C56 C57 C58 118.5(5) . . ? 
C56 C57 P22 117.3(4) . . ? 
C58 C57 P22 124.0(4) . . ? 
C57 C56 C62 119.6(5) . . ? 
C57 C56 N2 117.2(4) . . ? 
C62 C56 N2 123.2(5) . . ? 
C57 C58 C59 122.5(5) . . ? 
C57 C58 H58 118.7 . . ? 
C59 C58 H58 118.7 . . ? 
C61 C59 C58 117.6(5) . . ? 
C61 C59 C60 120.6(5) . . ? 
C58 C59 C60 121.8(6) . . ? 
C59 C61 C62 120.9(5) . . ? 
C59 C61 H61 119.5 . . ? 
C62 C61 H61 119.5 . . ? 
C59 C60 H60A 109.5 . . ? 
C59 C60 H60B 109.5 . . ? 
H60A C60 H60B 109.5 . . ? 
C59 C60 H60C 109.5 . . ? 
H60A C60 H60C 109.5 . . ? 
H60B C60 H60C 109.5 . . ? 
C61 C62 C56 120.4(5) . . ? 
C61 C62 H62 119.8 . . ? 
C56 C62 H62 119.8 . . ? 
C64 C63 C65 112.0(4) . . ? 
C64 C63 P22 113.6(3) . . ? 
C65 C63 P22 112.8(3) . . ? 
C64 C63 H63 105.9 . . ? 
C65 C63 H63 105.9 . . ? 
P22 C63 H63 105.9 . . ? 
C68 C66 C67 109.7(4) . . ? 
C68 C66 P22 112.1(3) . . ? 
C67 C66 P22 110.9(4) . . ? 
C68 C66 H66 108.0 . . ? 
C67 C66 H66 108.0 . . ? 
P22 C66 H66 108.0 . . ? 
C63 C65 H65A 109.5 . . ? 
C63 C65 H65B 109.5 . . ? 
H65A C65 H65B 109.5 . . ? 
C63 C65 H65C 109.5 . . ? 
H65A C65 H65C 109.5 . . ? 
H65B C65 H65C 109.5 . . ? 
C63 C64 H64A 109.5 . . ? 
C63 C64 H64B 109.5 . . ? 
H64A C64 H64B 109.5 . . ? 
C63 C64 H64C 109.5 . . ? 
H64A C64 H64C 109.5 . . ? 
H64B C64 H64C 109.5 . . ? 
C66 C68 H68A 109.5 . . ? 
C66 C68 H68B 109.5 . . ? 
H68A C68 H68B 109.5 . . ? 
C66 C68 H68C 109.5 . . ? 
H68A C68 H68C 109.5 . . ? 
H68B C68 H68C 109.5 . . ? 
C66 C67 H67A 109.5 . . ? 
C66 C67 H67B 109.5 . . ? 
H67A C67 H67B 109.5 . . ? 
C66 C67 H67C 109.5 . . ? 
H67A C67 H67C 109.5 . . ? 
H67B C67 H67C 109.5 . . ? 
C69 C70 C71 119.5(5) . . ? 
C69 C70 N2 120.3(5) . . ? 
C71 C70 N2 120.2(5) . . ? 
C70 C69 C74 118.2(5) . . ? 
C70 C69 P21 120.4(4) . . ? 
C74 C69 P21 121.4(4) . . ? 
C73 C74 C69 123.7(6) . . ? 
C73 C74 H74 118.1 . . ? 
C69 C74 H74 118.1 . . ? 
C74 C73 C72 116.0(5) . . ? 
C74 C73 C75 121.3(6) . . ? 
C72 C73 C75 122.7(6) . . ? 
C71 C72 C73 121.6(6) . . ? 
C71 C72 H72 119.2 . . ? 
C73 C72 H72 119.2 . . ? 
C72 C71 C70 120.9(6) . . ? 
C72 C71 H71 119.6 . . ? 
C70 C71 H71 119.6 . . ? 
C73 C75 H75A 109.5 . . ? 
C73 C75 H75B 109.5 . . ? 
H75A C75 H75B 109.5 . . ? 
C73 C75 H75C 109.5 . . ? 
H75A C75 H75C 109.5 . . ? 
H75B C75 H75C 109.5 . . ? 
C80 C79 C81 109.4(4) . . ? 
C80 C79 P21 112.4(4) . . ? 
C81 C79 P21 111.6(4) . . ? 
C80 C79 H79 107.7 . . ? 
C81 C79 H79 107.7 . . ? 
P21 C79 H79 107.7 . . ? 
C76 C78 H78A 109.5 . . ? 
C76 C78 H78B 109.5 . . ? 
H78A C78 H78B 109.5 . . ? 
C76 C78 H78C 109.5 . . ? 
H78A C78 H78C 109.5 . . ? 
H78B C78 H78C 109.5 . . ? 
C76 C77 H77A 109.5 . . ? 
C76 C77 H77B 109.5 . . ? 
H77A C77 H77B 109.5 . . ? 
C76 C77 H77C 109.5 . . ? 
H77A C77 H77C 109.5 . . ? 
H77B C77 H77C 109.5 . . ? 
C77 C76 C78 109.4(5) . . ? 
C77 C76 P21 112.7(5) . . ? 
C78 C76 P21 109.5(4) . . ? 
C77 C76 H76 108.4 . . ? 
C78 C76 H76 108.4 . . ? 
P21 C76 H76 108.4 . . ? 
C79 C80 H80A 109.5 . . ? 
C79 C80 H80B 109.5 . . ? 
H80A C80 H80B 109.5 . . ? 
C79 C80 H80C 109.5 . . ? 
H80A C80 H80C 109.5 . . ? 
H80B C80 H80C 109.5 . . ? 
C79 C81 H81A 109.5 . . ? 
C79 C81 H81B 109.5 . . ? 
H81A C81 H81B 109.5 . . ? 
C79 C81 H81C 109.5 . . ? 
H81A C81 H81C 109.5 . . ? 
H81B C81 H81C 109.5 . . ? 
 
_diffrn_measured_fraction_theta_max    1.000 
_diffrn_reflns_theta_full              25.00 
_diffrn_measured_fraction_theta_full   1.000 
_refine_diff_density_max    1.068 
_refine_diff_density_min   -0.688 
_refine_diff_density_rms    0.086 
_iucr_refine_instructions_details
;
TITL sv42 in Aba2
CELL 0.71073 16.4549 28.1717 28.4401 90 90 90
ZERR 8 0.002 0.0033 0.0033 0 0 0
LATT -5
SYMM -X,-Y,+Z
SYMM 0.5+X,0.5-Y,+Z
SYMM 0.5-X,0.5+Y,+Z
 
SFAC C H N P Ir
UNIT 576 760 16 32 16
 
L.S. 4
PLAN  20
SIZE 0.027 0.024 0.020
TEMP -153
 
BOND $H
LIST 6
FMAP 2
ACTA 50
Omit 0 50
OMIT 0 2 0
 
WGHT    0.011400
FVAR       0.06242
IR1   5    0.197478    0.628906    0.495418    11.00000    0.01454    0.01726 =
         0.01722   -0.00129   -0.00128    0.00284
N1    3    0.202966    0.574819    0.436350    11.00000    0.01087    0.02163 =
         0.01332    0.00314   -0.00099    0.00030
IR2   5    0.298815    0.347153    0.184691    11.00000    0.01230    0.01643 =
         0.01748   -0.00124   -0.00166   -0.00055
H3    2    0.322296    0.360994    0.141523    11.00000   -1.20000
N2    3    0.248146    0.317562    0.252373    11.00000    0.01501    0.02143 =
         0.01291   -0.00495   -0.00087   -0.00271
C10   1    0.274568    0.588943    0.407142    11.00000    0.01201    0.02792 =
         0.01278    0.00016   -0.00174    0.00028
H1    2    0.168599    0.596746    0.523559    11.00000   -1.20000
H2    2    0.194869    0.666296    0.528069    11.00000   -1.20000
C11   1    0.315690    0.556711    0.380405    11.00000    0.01984    0.01927 =
         0.02465   -0.00283    0.00085    0.00157
AFIX  43
H14   2    0.301642    0.524018    0.381386    11.00000   -1.20000
AFIX   0
P11   4    0.304123    0.585267    0.522320    11.00000    0.01506    0.01696 =
         0.01681    0.00225   -0.00077    0.00135
C12   1    0.379814    0.572828    0.351098    11.00000    0.01689    0.04872 =
         0.02030   -0.00579    0.00452    0.00227
AFIX  43
H15   2    0.409503    0.550805    0.332529    11.00000   -1.20000
AFIX   0
P12   4    0.069351    0.641853    0.472485    11.00000    0.01475    0.02748 =
         0.02210   -0.00407   -0.00110    0.00456
C13   1    0.398754    0.619748    0.349591    11.00000    0.01437    0.04337 =
         0.02511    0.00559    0.00410   -0.00211
AFIX  43
H13   2    0.440516    0.630092    0.328928    11.00000   -1.20000
AFIX   0
C14   1    0.358412    0.653596    0.377716    11.00000    0.01477    0.02551 =
         0.02076    0.00529   -0.00126   -0.00796
C15   1    0.296083    0.638093    0.409707    11.00000    0.01887    0.02100 =
         0.01060    0.00350   -0.00668   -0.00039
C16   1    0.379752    0.701771    0.378526    11.00000    0.02217    0.03969 =
         0.03260    0.01481   -0.00700   -0.00553
AFIX  43
H16   2    0.420714    0.713371    0.357982    11.00000   -1.20000
AFIX   0
C18   1    0.283662    0.715463    0.441621    11.00000    0.02318    0.01706 =
         0.03003    0.00103   -0.01121   -0.00095
AFIX  43
H18   2    0.259066    0.737468    0.462552    11.00000   -1.20000
AFIX   0
C19   1    0.261193    0.667893    0.444363    11.00000    0.01749    0.02245 =
         0.01814   -0.00464   -0.01367    0.00455
C17   1    0.341285    0.732242    0.409123    11.00000    0.02900    0.02519 =
         0.04207    0.01116   -0.01736   -0.01300
AFIX  43
H17   2    0.353875    0.765141    0.408267    11.00000   -1.20000
AFIX   0
C21   1    0.103967    0.300724    0.274258    11.00000    0.02179    0.03027 =
         0.02217   -0.00041    0.00901    0.00134
AFIX  43
H24   2    0.121793    0.274545    0.292615    11.00000   -1.20000
AFIX   0
C20   1    0.158285    0.327425    0.250092    11.00000    0.01298    0.02564 =
         0.01616   -0.00667   -0.00215    0.00262
P21   4    0.380843    0.390836    0.229467    11.00000    0.01596    0.01867 =
         0.02981   -0.00414   -0.00512    0.00142
C24   1    0.050766    0.379375    0.221840    11.00000    0.01328    0.03535 =
         0.03369   -0.00626   -0.00047    0.00325
C23   1   -0.004583    0.350902    0.247106    11.00000    0.01299    0.04186 =
         0.03470   -0.01371   -0.00036   -0.00106
AFIX  43
H23   2   -0.060671    0.358891    0.246845    11.00000   -1.20000
AFIX   0
C22   1    0.020507    0.312284    0.271825    11.00000    0.01856    0.03768 =
         0.03248   -0.00533    0.00912   -0.00338
AFIX  43
H25   2   -0.018258    0.292976    0.287540    11.00000   -1.20000
AFIX   0
P22   4    0.240127    0.279822    0.155645    11.00000    0.01157    0.01722 =
         0.01588   -0.00043   -0.00013   -0.00015
C25   1    0.135147    0.365902    0.220782    11.00000    0.01536    0.02176 =
         0.02225   -0.00957   -0.00421    0.00113
C26   1    0.027059    0.419607    0.194616    11.00000    0.02044    0.03069 =
         0.04575   -0.00999   -0.00899    0.00926
AFIX  43
H26   2   -0.027640    0.430369    0.195347    11.00000   -1.20000
AFIX   0
C29   1    0.190911    0.387261    0.189172    11.00000    0.02287    0.02287 =
         0.01599   -0.00412   -0.01207   -0.00734
C28   1    0.162892    0.425939    0.163653    11.00000    0.02550    0.03153 =
         0.02857    0.00163   -0.01332    0.00373
AFIX  43
H28   2    0.198969    0.441766    0.142812    11.00000   -1.20000
AFIX   0
C27   1    0.082378    0.442324    0.167857    11.00000    0.02809    0.03053 =
         0.03509   -0.00051   -0.01058    0.00484
AFIX  43
H27   2    0.066596    0.470168    0.151374    11.00000   -1.20000
AFIX   0
C49   1    0.273829    0.528156    0.497560    11.00000    0.01238    0.01852 =
         0.01760    0.00311    0.00320    0.00007
C48   1    0.291618    0.484230    0.517279    11.00000    0.01745    0.02342 =
         0.02227   -0.00196    0.00293    0.00535
AFIX  43
H48   2    0.329875    0.483101    0.542271    11.00000   -1.20000
AFIX   0
C47   1    0.274867    0.395823    0.527291    11.00000    0.04068    0.02132 =
         0.02823    0.00796    0.00702    0.00450
AFIX 137
H47A  2    0.257924    0.369113    0.507511    11.00000   -1.50000
H47B  2    0.245274    0.394774    0.557177    11.00000   -1.50000
H47C  2    0.333375    0.393676    0.533368    11.00000   -1.50000
AFIX   0
C46   1    0.256508    0.441686    0.502474    11.00000    0.02421    0.01892 =
         0.02019    0.00321    0.01150    0.00360
C45   1    0.201330    0.444599    0.465947    11.00000    0.02220    0.01213 =
         0.03351   -0.00182    0.00546   -0.00554
AFIX  43
H45   2    0.175415    0.416388    0.455457    11.00000   -1.20000
AFIX   0
C44   1    0.182533    0.486810    0.444215    11.00000    0.01224    0.02199 =
         0.02183   -0.00027    0.00283   -0.00453
AFIX  43
H44   2    0.144586    0.487209    0.419044    11.00000   -1.20000
AFIX   0
C43   1    0.218512    0.528684    0.458764    11.00000    0.01154    0.01665 =
         0.01334    0.00009    0.00685    0.00200
C42   1    0.068637    0.710804    0.400928    11.00000    0.03910    0.02726 =
         0.04106    0.01200   -0.01356    0.00157
AFIX 137
H42A  2    0.051505    0.686463    0.378394    11.00000   -1.50000
H42B  2    0.128087    0.711189    0.402955    11.00000   -1.50000
H42C  2    0.049229    0.741939    0.390433    11.00000   -1.50000
AFIX   0
C41   1    0.055211    0.739598    0.483168    11.00000    0.06122    0.02572 =
         0.05565   -0.00975   -0.00816    0.01955
AFIX 137
H41A  2    0.113634    0.738529    0.489775    11.00000   -1.50000
H41B  2    0.024837    0.735628    0.512546    11.00000   -1.50000
H41C  2    0.041409    0.770259    0.468984    11.00000   -1.50000
AFIX   0
C40   1    0.032991    0.699637    0.449167    11.00000    0.02652    0.02515 =
         0.03947   -0.00149   -0.00427    0.01545
AFIX  13
H40   2   -0.027535    0.698312    0.446297    11.00000   -1.20000
AFIX   0
C39   1   -0.011436    0.566929    0.518243    11.00000    0.01940    0.04485 =
         0.04116    0.01179   -0.00106   -0.01167
AFIX 137
H39A  2   -0.010534    0.550793    0.487720    11.00000   -1.50000
H39B  2   -0.059468    0.556814    0.535982    11.00000   -1.50000
H39C  2    0.037730    0.558767    0.535930    11.00000   -1.50000
AFIX   0
C38   1   -0.016300    0.646097    0.557937    11.00000    0.02248    0.07901 =
         0.02811   -0.01610    0.00938   -0.00595
AFIX 137
H38A  2    0.037123    0.643493    0.572949    11.00000   -1.50000
H38B  2   -0.057495    0.631450    0.578155    11.00000   -1.50000
H38C  2   -0.029609    0.679656    0.553138    11.00000   -1.50000
AFIX   0
C37   1   -0.014615    0.620716    0.510579    11.00000    0.01002    0.04878 =
         0.02002   -0.00261   -0.00291    0.00073
AFIX  13
H37   2   -0.066835    0.628059    0.494129    11.00000   -1.20000
AFIX   0
C36   1    0.060855    0.602400    0.421653    11.00000    0.01872    0.02199 =
         0.01343   -0.00056   -0.00105    0.00356
C35   1   -0.010581    0.600016    0.395241    11.00000    0.01528    0.02341 =
         0.02368    0.00038    0.00039    0.00273
AFIX  43
H35   2   -0.057128    0.616522    0.406341    11.00000   -1.20000
AFIX   0
C34   1   -0.096229    0.572967    0.327193    11.00000    0.02410    0.02895 =
         0.02523    0.00731   -0.00717   -0.00361
AFIX 137
H34A  2   -0.112187    0.605191    0.318070    11.00000   -1.50000
H34B  2   -0.138322    0.559159    0.347372    11.00000   -1.50000
H34C  2   -0.089762    0.553393    0.298954    11.00000   -1.50000
AFIX   0
C33   1   -0.016773    0.574747    0.353661    11.00000    0.02286    0.01702 =
         0.01917    0.00788   -0.00385   -0.00190
C32   1    0.052978    0.553002    0.337351    11.00000    0.02555    0.02272 =
         0.01556    0.00103   -0.00348   -0.00198
AFIX  43
H32   2    0.052195    0.537186    0.307853    11.00000   -1.20000
AFIX   0
C31   1    0.124054    0.553946    0.363430    11.00000    0.01574    0.02504 =
         0.02022    0.00069    0.00350    0.00011
AFIX  43
H31   2    0.171166    0.538665    0.351444    11.00000   -1.20000
AFIX   0
C30   1    0.128070    0.576700    0.406680    11.00000    0.01718    0.01731 =
         0.02004    0.00652   -0.00283   -0.00178
C53   1    0.315589    0.571688    0.585191    11.00000    0.01927    0.01794 =
         0.02746   -0.00337    0.00245    0.00383
AFIX  13
H53   2    0.356372    0.545541    0.588148    11.00000   -1.20000
AFIX   0
C52   1    0.439643    0.646133    0.505608    11.00000    0.01909    0.02445 =
         0.03742    0.01059   -0.00053   -0.00226
AFIX 137
H52A  2    0.491104    0.649733    0.488634    11.00000   -1.50000
H52B  2    0.447841    0.653896    0.538861    11.00000   -1.50000
H52C  2    0.398992    0.667615    0.492140    11.00000   -1.50000
AFIX   0
C51   1    0.471414    0.560266    0.521234    11.00000    0.01261    0.03061 =
         0.06173    0.01226    0.00589    0.00721
AFIX 137
H51A  2    0.451927    0.527585    0.517729    11.00000   -1.50000
H51B  2    0.479615    0.567288    0.554647    11.00000   -1.50000
H51C  2    0.522984    0.563959    0.504390    11.00000   -1.50000
AFIX   0
C50   1    0.409488    0.594032    0.501150    11.00000    0.02487    0.01476 =
         0.02677    0.00000    0.00211    0.00306
AFIX  13
H50   2    0.407896    0.587242    0.466650    11.00000   -1.20000
AFIX   0
C54   1    0.236330    0.554678    0.608253    11.00000    0.03145    0.03708 =
         0.01738    0.00422   -0.00017   -0.00129
AFIX 137
H54A  2    0.197874    0.581175    0.610095    11.00000   -1.50000
H54B  2    0.247912    0.542941    0.639991    11.00000   -1.50000
H54C  2    0.212650    0.529067    0.589382    11.00000   -1.50000
AFIX   0
C55   1    0.348508    0.614606    0.611750    11.00000    0.03266    0.03085 =
         0.02430   -0.00049    0.00196    0.00063
AFIX 137
H55A  2    0.404117    0.621259    0.601320    11.00000   -1.50000
H55B  2    0.348543    0.607899    0.645562    11.00000   -1.50000
H55C  2    0.314018    0.642240    0.605435    11.00000   -1.50000
AFIX   0
C57   1    0.248512    0.242543    0.208508    11.00000    0.00824    0.01722 =
         0.01963    0.00013    0.00123    0.00115
C56   1    0.261487    0.265555    0.251222    11.00000    0.00923    0.02060 =
         0.02551    0.00011    0.00622    0.00130
C58   1    0.249190    0.193072    0.207756    11.00000    0.00753    0.02911 =
         0.02809    0.00071    0.00229    0.00096
AFIX  43
H58   2    0.239028    0.177258    0.178846    11.00000   -1.20000
AFIX   0
C59   1    0.264227    0.165873    0.247852    11.00000    0.01549    0.02401 =
         0.03383    0.00467    0.00799    0.00572
C61   1    0.283721    0.189702    0.288904    11.00000    0.02435    0.03262 =
         0.02521    0.00945    0.00566    0.00825
AFIX  43
H61   2    0.298430    0.172114    0.316104    11.00000   -1.20000
AFIX   0
C60   1    0.260546    0.112364    0.246935    11.00000    0.03074    0.02755 =
         0.03771    0.01127    0.00115   -0.00062
AFIX 137
H60A  2    0.221733    0.102089    0.222863    11.00000   -1.50000
H60B  2    0.243024    0.100631    0.277749    11.00000   -1.50000
H60C  2    0.314491    0.099620    0.239598    11.00000   -1.50000
AFIX   0
C62   1    0.282078    0.239062    0.290896    11.00000    0.02081    0.03075 =
         0.01997   -0.00031    0.00549    0.00323
AFIX  43
H62   2    0.295066    0.254803    0.319464    11.00000   -1.20000
AFIX   0
C63   1    0.130119    0.276079    0.140180    11.00000    0.01145    0.02291 =
         0.02328    0.00132    0.00116   -0.00150
AFIX  13
H63   2    0.099818    0.282450    0.169999    11.00000   -1.20000
AFIX   0
C66   1    0.292850    0.246182    0.109928    11.00000    0.01245    0.01503 =
         0.02036   -0.00515   -0.00136   -0.00226
AFIX  13
H66   2    0.264078    0.215174    0.105956    11.00000   -1.20000
AFIX   0
C65   1    0.103683    0.314716    0.105760    11.00000    0.01658    0.03026 =
         0.03074    0.00923   -0.00965    0.00261
AFIX 137
H65A  2    0.120942    0.306093    0.073906    11.00000   -1.50000
H65B  2    0.128751    0.344953    0.114701    11.00000   -1.50000
H65C  2    0.044393    0.317896    0.106587    11.00000   -1.50000
AFIX   0
C64   1    0.103569    0.226896    0.124184    11.00000    0.01186    0.02181 =
         0.03566   -0.00520   -0.00003   -0.00328
AFIX 137
H64A  2    0.044674    0.226699    0.119063    11.00000   -1.50000
H64B  2    0.117582    0.203546    0.148406    11.00000   -1.50000
H64C  2    0.131360    0.218782    0.094786    11.00000   -1.50000
AFIX   0
C68   1    0.380859    0.235718    0.123101    11.00000    0.01542    0.02735 =
         0.02867   -0.00788    0.00262   -0.00090
AFIX 137
H68A  2    0.406456    0.217073    0.098062    11.00000   -1.50000
H68B  2    0.382307    0.217702    0.152566    11.00000   -1.50000
H68C  2    0.410386    0.265652    0.127141    11.00000   -1.50000
AFIX   0
C67   1    0.289991    0.272479    0.062736    11.00000    0.03539    0.03785 =
         0.01945    0.00061    0.00692    0.00231
AFIX 137
H67A  2    0.324969    0.256185    0.039991    11.00000   -1.50000
H67B  2    0.309173    0.305121    0.067068    11.00000   -1.50000
H67C  2    0.234004    0.272935    0.050994    11.00000   -1.50000
AFIX   0
C70   1    0.283770    0.342464    0.293983    11.00000    0.02099    0.02459 =
         0.01626   -0.00767   -0.00590    0.01292
C69   1    0.347419    0.373821    0.288253    11.00000    0.01846    0.03012 =
         0.02517   -0.01751    0.00058    0.00627
C74   1    0.382007    0.393896    0.328450    11.00000    0.01614    0.05787 =
         0.03044   -0.01556    0.00086    0.00169
AFIX  43
H74   2    0.425647    0.415609    0.324489    11.00000   -1.20000
AFIX   0
C73   1    0.356301    0.383947    0.373728    11.00000    0.02378    0.06628 =
         0.02367   -0.02283   -0.00588    0.01341
C72   1    0.289817    0.353401    0.377652    11.00000    0.02713    0.07121 =
         0.01628   -0.01135    0.00087    0.01687
AFIX  43
H72   2    0.269212    0.345986    0.407979    11.00000   -1.20000
AFIX   0
C71   1    0.253535    0.333843    0.338805    11.00000    0.02189    0.03923 =
         0.02421   -0.00264   -0.00019    0.00909
AFIX  43
H71   2    0.207131    0.314145    0.342581    11.00000   -1.20000
AFIX   0
C75   1    0.397971    0.405414    0.415839    11.00000    0.02568    0.11984 =
         0.03557   -0.03728    0.00144    0.00329
AFIX 137
H75A  2    0.456418    0.407892    0.409690    11.00000   -1.50000
H75B  2    0.388913    0.385210    0.443396    11.00000   -1.50000
H75C  2    0.375684    0.437103    0.421821    11.00000   -1.50000
AFIX   0
C79   1    0.490763    0.376557    0.231875    11.00000    0.01509    0.02808 =
         0.02481   -0.00472   -0.00366   -0.00354
AFIX  13
H79   2    0.516190    0.397615    0.256058    11.00000   -1.20000
AFIX   0
C78   1    0.383587    0.476121    0.181237    11.00000    0.04172    0.03102 =
         0.12454    0.04170   -0.03223   -0.01397
AFIX 137
H78A  2    0.437435    0.469402    0.168106    11.00000   -1.50000
H78B  2    0.374670    0.510510    0.181872    11.00000   -1.50000
H78C  2    0.341875    0.461069    0.161676    11.00000   -1.50000
AFIX   0
C77   1    0.302405    0.475668    0.255473    11.00000    0.07178    0.03474 =
         0.08922   -0.03490   -0.03404    0.02779
AFIX 137
H77A  2    0.301129    0.510316    0.252495    11.00000   -1.50000
H77B  2    0.303213    0.466958    0.288830    11.00000   -1.50000
H77C  2    0.254024    0.462109    0.240526    11.00000   -1.50000
AFIX   0
C76   1    0.378550    0.456371    0.231417    11.00000    0.03970    0.02524 =
         0.06908   -0.00480   -0.03145   -0.00270
AFIX  13
H76   2    0.427181    0.467617    0.249321    11.00000   -1.20000
AFIX   0
C80   1    0.506534    0.325345    0.246353    11.00000    0.01161    0.03215 =
         0.03728   -0.00176   -0.00508    0.00472
AFIX 137
H80A  2    0.489268    0.304001    0.221043    11.00000   -1.50000
H80B  2    0.475787    0.318127    0.274985    11.00000   -1.50000
H80C  2    0.564696    0.320946    0.252350    11.00000   -1.50000
AFIX   0
C81   1    0.532588    0.386398    0.184949    11.00000    0.02620    0.04167 =
         0.03191    0.00015    0.00780    0.00253
AFIX 137
H81A  2    0.507085    0.367245    0.160257    11.00000   -1.50000
H81B  2    0.590292    0.378129    0.187322    11.00000   -1.50000
H81C  2    0.527229    0.420138    0.177151    11.00000   -1.50000
REM #####
REM #####
REM #####
REM #####
REM #####
REM #####
REM #####
HKLF 4
 
REM  sv42 in Aba2
REM R1 =  0.0263 for  10089 Fo > 4sig(Fo)  and  0.0317 for all  11178 data
REM    750 parameters refined using      1 restraints
 
END  
     
WGHT      0.0114      0.0000 
REM Highest difference peak  1.068,  deepest hole -0.688,  1-sigma level  0.086
Q1    1   0.2009  0.6756  0.4961  11.00000  0.05    1.07
Q2    1   0.3011  0.3933  0.1868  11.00000  0.05    0.97
Q3    1   0.4056  0.6265  0.4964  11.00000  0.05    0.65
Q4    1   0.1022  0.3497  0.1841  11.00000  0.05    0.62
Q5    1   0.1860  0.5927  0.4934  11.00000  0.05    0.60
Q6    1   0.2968  0.3130  0.1796  11.00000  0.05    0.58
Q7    1   0.1967  0.4095  0.1858  11.00000  0.05    0.58
Q8    1   0.1608  0.6610  0.4683  11.00000  0.05    0.51
Q9    1   0.3434  0.3788  0.2123  11.00000  0.05    0.51
Q10   1   0.3754  0.3153  0.1823  11.00000  0.05    0.48
Q11   1   0.3189  0.3518  0.1833  11.00000  0.05    0.48
Q12   1   0.2833  0.3673  0.2174  11.00000  0.05    0.46
Q13   1   0.2970  0.5642  0.4956  11.00000  0.05    0.46
Q14   1   0.2421  0.5927  0.4788  11.00000  0.05    0.45
Q15   1   0.2202  0.3136  0.1793  11.00000  0.05    0.44
Q16   1   0.2188  0.4550  0.1867  11.00000  0.05    0.44
Q17   1   0.2310  0.6593  0.4697  11.00000  0.05    0.42
Q18   1   0.2303  0.3806  0.1907  11.00000  0.05    0.42
Q19   1   0.2981  0.6738  0.3710  11.00000  0.05    0.40
Q20   1   0.1467  0.6215  0.4592  11.00000  0.05    0.39


; 


 
data_sv360 
 
_audit_creation_method            SHELXL-97 
_chemical_name_systematic 
; 
 ? 
; 
_chemical_name_common             ? 
_chemical_melting_point           ? 
_chemical_formula_moiety          ? 
_chemical_formula_sum 
 'C33 H48 Ir N P2' 
_chemical_formula_weight          712.86 
 
loop_ 
 _atom_type_symbol 
 _atom_type_description 
 _atom_type_scat_dispersion_real 
 _atom_type_scat_dispersion_imag 
 _atom_type_scat_source 
 'C'  'C'   0.0033   0.0016 
 'International Tables Vol C Tables 4.2.6.8 and 6.1.1.4' 
 'H'  'H'   0.0000   0.0000 
 'International Tables Vol C Tables 4.2.6.8 and 6.1.1.4' 
 'N'  'N'   0.0061   0.0033 
 'International Tables Vol C Tables 4.2.6.8 and 6.1.1.4' 
 'P'  'P'   0.1023   0.0942 
 'International Tables Vol C Tables 4.2.6.8 and 6.1.1.4' 
 'Ir'  'Ir'  -1.4442   7.9887 
 'International Tables Vol C Tables 4.2.6.8 and 6.1.1.4' 
 
_symmetry_cell_setting            'monoclinic' 
_symmetry_space_group_name_H-M    'P2(1)/n' 
 
loop_ 
 _symmetry_equiv_pos_as_xyz 
 'x, y, z' 
 '-x+1/2, y+1/2, -z+1/2' 
 '-x, -y, -z' 
 'x-1/2, -y-1/2, z-1/2' 
 
_cell_length_a                    11.6048(13) 
_cell_length_b                    10.3272(11) 
_cell_length_c                    28.571(3) 
_cell_angle_alpha                 90.00 
_cell_angle_beta                  100.4921(19) 
_cell_angle_gamma                 90.00 
_cell_volume                      3366.8(6) 
_cell_formula_units_Z             4 
_cell_measurement_temperature     120(2) 
_cell_measurement_reflns_used     6437 
_cell_measurement_theta_min       2.44 
_cell_measurement_theta_max       26.22 
 
_exptl_crystal_description        'block' 
_exptl_crystal_colour             ? 
_exptl_crystal_size_max           0.03 
_exptl_crystal_size_mid           0.03 
_exptl_crystal_size_min           0.02 
_exptl_crystal_density_meas       ? 
_exptl_crystal_density_diffrn     1.406 
_exptl_crystal_density_method     'not measured' 
_exptl_crystal_F_000              1440 
_exptl_absorpt_coefficient_mu     4.081 
_exptl_absorpt_correction_type    'multi-scan' 
_exptl_absorpt_correction_T_min   0.6553 
_exptl_absorpt_correction_T_max   0.7454 
_exptl_absorpt_process_details    'Bruker AXS area detector scaling and absorption correction' 
 
_exptl_special_details 
; 
 ? 
; 
 
_diffrn_ambient_temperature       120(2) 
_diffrn_radiation_wavelength      0.71073 
_diffrn_radiation_type            MoK\a 
_diffrn_radiation_source          'fine-focus sealed tube' 
_diffrn_radiation_monochromator   graphite 
_diffrn_measurement_device_type   'Bruker APEX-II' 
_diffrn_measurement_method        ? 
_diffrn_detector_area_resol_mean  ? 
_diffrn_standards_number          ? 
_diffrn_standards_interval_count  ? 
_diffrn_standards_interval_time   ? 
_diffrn_standards_decay_%         ? 
_diffrn_reflns_number             26491 
_diffrn_reflns_av_R_equivalents   0.0535 
_diffrn_reflns_av_sigmaI/netI     0.0436 
_diffrn_reflns_limit_h_min        -13 
_diffrn_reflns_limit_h_max        13 
_diffrn_reflns_limit_k_min        -12 
_diffrn_reflns_limit_k_max        12 
_diffrn_reflns_limit_l_min        -33 
_diffrn_reflns_limit_l_max        33 
_diffrn_reflns_theta_min          2.04 
_diffrn_reflns_theta_max          25.00 
_reflns_number_total              5897 
_reflns_number_gt                 4814 
_reflns_threshold_expression      >2sigma(I) 
 
_computing_data_collection        ? 
_computing_cell_refinement        ? 
_computing_data_reduction         ? 
_computing_structure_solution     'SHELXS-97 (Sheldrick, 1990)' 
_computing_structure_refinement   'SHELXL-97 (Sheldrick, 1997)' 
_computing_molecular_graphics     ? 
_computing_publication_material   ? 
 
_refine_special_details 
; 
 Refinement of F^2^ against ALL reflections.  The weighted R-factor wR and 
 goodness of fit S are based on F^2^, conventional R-factors R are based 
 on F, with F set to zero for negative F^2^. The threshold expression of 
 F^2^ > 2sigma(F^2^) is used only for calculating R-factors(gt) etc. and is 
 not relevant to the choice of reflections for refinement.  R-factors based 
 on F^2^ are statistically about twice as large as those based on F, and R- 
 factors based on ALL data will be even larger. 
; 
 
_refine_ls_structure_factor_coef  Fsqd  
_refine_ls_matrix_type            full 
_refine_ls_weighting_scheme       calc  
_refine_ls_weighting_details 
 'calc w=1/[\s^2^(Fo^2^)+(0.0532P)^2^+9.0632P] where P=(Fo^2^+2Fc^2^)/3' 
_atom_sites_solution_primary      direct 
_atom_sites_solution_secondary    difmap 
_atom_sites_solution_hydrogens    geom 
_refine_ls_hydrogen_treatment     mixed 
_refine_ls_extinction_method      none 
_refine_ls_extinction_coef        ? 
_refine_ls_number_reflns          5897 
_refine_ls_number_parameters      348 
_refine_ls_number_restraints      0 
_refine_ls_R_factor_all           0.0516 
_refine_ls_R_factor_gt            0.0368 
_refine_ls_wR_factor_ref          0.0985 
_refine_ls_wR_factor_gt           0.0938 
_refine_ls_goodness_of_fit_ref    1.059 
_refine_ls_restrained_S_all       1.059 
_refine_ls_shift/su_max           0.001 
_refine_ls_shift/su_mean          0.000 
 
loop_ 
 _atom_site_label 
 _atom_site_type_symbol 
 _atom_site_fract_x 
 _atom_site_fract_y 
 _atom_site_fract_z 
 _atom_site_U_iso_or_equiv 
 _atom_site_adp_type 
 _atom_site_occupancy 
 _atom_site_symmetry_multiplicity 
 _atom_site_calc_flag 
 _atom_site_refinement_flags 
 _atom_site_disorder_assembly 
 _atom_site_disorder_group 
Ir Ir 0.40307(2) 0.96116(2) 0.157044(8) 0.01296(9) Uani 1 1 d . . . 
H1 H 0.396(6) 1.083(6) 0.180(2) 0.023(18) Uiso 1 1 d . . . 
P1 P 0.30879(15) 0.99929(15) 0.08295(6) 0.0161(4) Uani 1 1 d . . . 
H2 H 0.281(8) 0.948(8) 0.179(3) 0.06(3) Uiso 1 1 d . . . 
P2 P 0.49119(13) 0.87173(15) 0.22734(5) 0.0129(3) Uani 1 1 d . . . 
C11 C 0.4035(5) 0.7508(6) 0.0770(2) 0.0140(13) Uani 1 1 d . . . 
C12 C 0.3265(5) 0.8446(6) 0.0536(2) 0.0171(14) Uani 1 1 d . . . 
C13 C 0.2719(6) 0.8211(6) 0.0065(2) 0.0181(14) Uani 1 1 d . . . 
H13 H 0.2180 0.8835 -0.0091 0.022 Uiso 1 1 calc R . . 
C14 C 0.2926(5) 0.7107(6) -0.0186(2) 0.0173(13) Uani 1 1 d . . . 
C15 C 0.3744(6) 0.6233(6) 0.0047(2) 0.0196(14) Uani 1 1 d . . . 
H15 H 0.3926 0.5480 -0.0116 0.024 Uiso 1 1 calc R . . 
C16 C 0.4299(5) 0.6438(6) 0.0511(2) 0.0166(13) Uani 1 1 d . . . 
H16 H 0.4872 0.5836 0.0658 0.020 Uiso 1 1 calc R . . 
C17 C 0.2306(6) 0.6881(6) -0.0687(2) 0.0250(16) Uani 1 1 d . . . 
H17A H 0.2884 0.6727 -0.0892 0.037 Uiso 1 1 calc R . . 
H17B H 0.1835 0.7644 -0.0801 0.037 Uiso 1 1 calc R . . 
H17C H 0.1793 0.6124 -0.0697 0.037 Uiso 1 1 calc R . . 
N N 0.4620(4) 0.7720(5) 0.12657(17) 0.0134(11) Uani 1 1 d . . . 
C27 C 0.5051(6) 0.3687(6) 0.2694(2) 0.0234(15) Uani 1 1 d . . . 
H27A H 0.4700 0.2876 0.2558 0.035 Uiso 1 1 calc R . . 
H27B H 0.4673 0.3951 0.2959 0.035 Uiso 1 1 calc R . . 
H27C H 0.5890 0.3557 0.2811 0.035 Uiso 1 1 calc R . . 
C26 C 0.4346(6) 0.5392(6) 0.1498(2) 0.0198(14) Uani 1 1 d . . . 
H26 H 0.4061 0.5166 0.1176 0.024 Uiso 1 1 calc R . . 
C25 C 0.4465(6) 0.4437(6) 0.1849(2) 0.0181(14) Uani 1 1 d . . . 
H25 H 0.4256 0.3570 0.1761 0.022 Uiso 1 1 calc R . . 
C24 C 0.4879(5) 0.4727(6) 0.2317(2) 0.0190(14) Uani 1 1 d . . . 
C23 C 0.5090(5) 0.6024(6) 0.2440(2) 0.0164(13) Uani 1 1 d . . . 
H23 H 0.5337 0.6239 0.2766 0.020 Uiso 1 1 calc R . . 
C22 C 0.4952(5) 0.7019(6) 0.2103(2) 0.0136(13) Uani 1 1 d . . . 
C21 C 0.4641(5) 0.6679(6) 0.1617(2) 0.0161(13) Uani 1 1 d . . . 
C34 C 0.7718(6) 0.9900(7) 0.1296(2) 0.0232(15) Uani 1 1 d . . . 
H34 H 0.8382 1.0435 0.1292 0.028 Uiso 1 1 calc R . . 
C33 C 0.6676(6) 1.0452(6) 0.1373(2) 0.0184(14) Uani 1 1 d . . . 
H33 H 0.6632 1.1360 0.1419 0.022 Uiso 1 1 calc R . . 
C32 C 0.5692(5) 0.9676(6) 0.1381(2) 0.0162(13) Uani 1 1 d . . . 
C31 C 0.5806(5) 0.8360(6) 0.1276(2) 0.0149(13) Uani 1 1 d . . . 
C35 C 0.7801(5) 0.8571(7) 0.1226(2) 0.0217(15) Uani 1 1 d . . . 
H35 H 0.8535 0.8215 0.1190 0.026 Uiso 1 1 calc R . . 
C37 C 0.7011(6) 0.6320(6) 0.1127(2) 0.0212(14) Uani 1 1 d . . . 
H37A H 0.6790 0.6123 0.0787 0.032 Uiso 1 1 calc R . . 
H37B H 0.6518 0.5821 0.1305 0.032 Uiso 1 1 calc R . . 
H37C H 0.7835 0.6091 0.1237 0.032 Uiso 1 1 calc R . . 
C36 C 0.6843(5) 0.7747(6) 0.1205(2) 0.0174(14) Uani 1 1 d . . . 
C41 C 0.6458(5) 0.9163(6) 0.2511(2) 0.0162(13) Uani 1 1 d . . . 
H41 H 0.6920 0.8906 0.2262 0.019 Uiso 1 1 calc R . . 
C42 C 0.4136(6) 0.8669(6) 0.2786(2) 0.0193(14) Uani 1 1 d . . . 
H42 H 0.4656 0.8244 0.3061 0.023 Uiso 1 1 calc R . . 
C43 C 0.7019(6) 0.8456(6) 0.2972(2) 0.0218(15) Uani 1 1 d . . . 
H43A H 0.6943 0.7518 0.2923 0.033 Uiso 1 1 calc R . . 
H43B H 0.6620 0.8714 0.3231 0.033 Uiso 1 1 calc R . . 
H43C H 0.7851 0.8686 0.3053 0.033 Uiso 1 1 calc R . . 
C44 C 0.6599(6) 1.0617(6) 0.2571(2) 0.0249(16) Uani 1 1 d . . . 
H44A H 0.6214 1.1051 0.2279 0.037 Uiso 1 1 calc R . . 
H44B H 0.7434 1.0837 0.2634 0.037 Uiso 1 1 calc R . . 
H44C H 0.6239 1.0902 0.2839 0.037 Uiso 1 1 calc R . . 
C45 C 0.3895(8) 1.0058(8) 0.2925(3) 0.040(2) Uani 1 1 d . . . 
H45A H 0.3561 1.0551 0.2640 0.060 Uiso 1 1 calc R . . 
H45B H 0.4630 1.0464 0.3080 0.060 Uiso 1 1 calc R . . 
H45C H 0.3340 1.0051 0.3146 0.060 Uiso 1 1 calc R . . 
C46 C 0.3002(6) 0.7921(7) 0.2673(2) 0.0287(16) Uani 1 1 d . . . 
H46A H 0.2483 0.8330 0.2405 0.043 Uiso 1 1 calc R . . 
H46B H 0.2620 0.7918 0.2952 0.043 Uiso 1 1 calc R . . 
H46C H 0.3166 0.7028 0.2589 0.043 Uiso 1 1 calc R . . 
C51 C 0.3765(8) 1.1175(7) 0.0470(2) 0.038(2) Uani 1 1 d . . . 
H51 H 0.4541 1.0776 0.0453 0.046 Uiso 1 1 calc R . . 
C52 C 0.1503(6) 1.0317(7) 0.0692(3) 0.0281(16) Uani 1 1 d . . . 
H52 H 0.1285 1.0498 0.0343 0.034 Uiso 1 1 calc R . . 
C53 C 0.4096(9) 1.2432(8) 0.0752(3) 0.0544(18) Uani 1 1 d . . . 
H53A H 0.4618 1.2950 0.0592 0.082 Uiso 1 1 calc R . . 
H53B H 0.4497 1.2218 0.1075 0.082 Uiso 1 1 calc R . . 
H53C H 0.3385 1.2929 0.0768 0.082 Uiso 1 1 calc R . . 
C54 C 0.3278(9) 1.1450(8) -0.0018(3) 0.0544(18) Uani 1 1 d . . . 
H54A H 0.3801 1.2037 -0.0150 0.082 Uiso 1 1 calc R . . 
H54B H 0.2509 1.1858 -0.0037 0.082 Uiso 1 1 calc R . . 
H54C H 0.3191 1.0641 -0.0200 0.082 Uiso 1 1 calc R . . 
C55 C 0.1218(7) 1.1519(8) 0.0959(3) 0.051(2) Uani 1 1 d . . . 
H55A H 0.1651 1.2262 0.0866 0.077 Uiso 1 1 calc R . . 
H55B H 0.1445 1.1373 0.1302 0.077 Uiso 1 1 calc R . . 
H55C H 0.0375 1.1694 0.0880 0.077 Uiso 1 1 calc R . . 
C56 C 0.0787(7) 0.9166(9) 0.0804(3) 0.042(2) Uani 1 1 d . . . 
H56A H -0.0048 0.9384 0.0731 0.063 Uiso 1 1 calc R . . 
H56B H 0.1009 0.8948 0.1142 0.063 Uiso 1 1 calc R . . 
H56C H 0.0940 0.8423 0.0611 0.063 Uiso 1 1 calc R . . 
 
loop_ 
 _atom_site_aniso_label 
 _atom_site_aniso_U_11 
 _atom_site_aniso_U_22 
 _atom_site_aniso_U_33 
 _atom_site_aniso_U_23 
 _atom_site_aniso_U_13 
 _atom_site_aniso_U_12 
Ir 0.01614(14) 0.01104(14) 0.01164(14) -0.00060(10) 0.00233(9) 0.00174(11) 
P1 0.0236(9) 0.0109(8) 0.0131(8) 0.0004(6) 0.0013(7) 0.0025(7) 
P2 0.0153(8) 0.0116(8) 0.0119(8) -0.0004(6) 0.0026(6) 0.0012(6) 
C11 0.016(3) 0.012(3) 0.014(3) 0.001(2) 0.003(3) -0.004(2) 
C12 0.019(3) 0.014(3) 0.018(3) -0.001(3) 0.004(3) -0.004(3) 
C13 0.023(3) 0.014(3) 0.016(3) 0.002(3) -0.001(3) 0.000(3) 
C14 0.022(3) 0.017(3) 0.014(3) -0.002(3) 0.005(3) -0.003(3) 
C15 0.027(4) 0.014(3) 0.019(3) -0.007(3) 0.005(3) 0.001(3) 
C16 0.019(3) 0.016(3) 0.013(3) -0.001(3) 0.000(3) 0.001(3) 
C17 0.034(4) 0.017(3) 0.021(4) -0.002(3) -0.004(3) 0.002(3) 
N 0.014(3) 0.014(3) 0.013(3) 0.001(2) 0.004(2) 0.000(2) 
C27 0.030(4) 0.015(3) 0.024(4) 0.004(3) 0.000(3) -0.003(3) 
C26 0.019(3) 0.020(3) 0.020(3) -0.006(3) 0.004(3) -0.004(3) 
C25 0.022(3) 0.012(3) 0.022(3) -0.002(3) 0.008(3) -0.001(3) 
C24 0.015(3) 0.017(3) 0.025(4) 0.001(3) 0.004(3) 0.002(3) 
C23 0.016(3) 0.017(3) 0.015(3) 0.001(3) 0.002(3) 0.003(3) 
C22 0.011(3) 0.013(3) 0.017(3) -0.004(3) 0.002(2) -0.001(2) 
C21 0.016(3) 0.017(3) 0.015(3) 0.002(3) 0.003(3) 0.000(3) 
C34 0.021(4) 0.025(4) 0.022(4) 0.001(3) 0.001(3) -0.011(3) 
C33 0.027(4) 0.013(3) 0.014(3) -0.002(3) 0.002(3) -0.003(3) 
C32 0.019(3) 0.021(3) 0.009(3) -0.002(3) 0.002(2) 0.000(3) 
C31 0.019(3) 0.015(3) 0.012(3) 0.003(2) 0.005(3) -0.002(3) 
C35 0.013(3) 0.030(4) 0.023(3) 0.001(3) 0.007(3) 0.003(3) 
C37 0.020(3) 0.016(3) 0.027(4) -0.008(3) 0.004(3) -0.001(3) 
C36 0.020(3) 0.021(3) 0.012(3) -0.004(3) 0.003(3) -0.003(3) 
C41 0.014(3) 0.015(3) 0.018(3) -0.002(3) -0.001(3) 0.002(2) 
C42 0.026(4) 0.021(3) 0.013(3) 0.001(3) 0.007(3) 0.006(3) 
C43 0.019(3) 0.020(4) 0.023(4) 0.000(3) -0.006(3) -0.001(3) 
C44 0.029(4) 0.016(4) 0.027(4) 0.002(3) -0.002(3) 0.000(3) 
C45 0.058(6) 0.034(4) 0.038(5) 0.000(4) 0.033(4) 0.009(4) 
C46 0.024(4) 0.037(4) 0.027(4) 0.003(3) 0.010(3) -0.002(3) 
C51 0.079(6) 0.016(4) 0.024(4) 0.002(3) 0.020(4) -0.012(4) 
C52 0.028(4) 0.030(4) 0.023(4) -0.004(3) -0.005(3) 0.013(3) 
C53 0.093(5) 0.032(3) 0.038(4) 0.002(3) 0.011(4) -0.019(3) 
C54 0.093(5) 0.032(3) 0.038(4) 0.002(3) 0.011(4) -0.019(3) 
C55 0.036(5) 0.044(5) 0.071(6) -0.018(5) 0.003(4) 0.023(4) 
C56 0.025(4) 0.057(6) 0.043(5) -0.012(4) 0.004(4) -0.002(4) 
 
_geom_special_details 
; 
 All esds (except the esd in the dihedral angle between two l.s. planes) 
 are estimated using the full covariance matrix.  The cell esds are taken 
 into account individually in the estimation of esds in distances, angles 
 and torsion angles; correlations between esds in cell parameters are only 
 used when they are defined by crystal symmetry.  An approximate (isotropic) 
 treatment of cell esds is used for estimating esds involving l.s. planes. 
; 
 
loop_ 
 _geom_bond_atom_site_label_1 
 _geom_bond_atom_site_label_2 
 _geom_bond_distance 
 _geom_bond_site_symmetry_2 
 _geom_bond_publ_flag 
Ir C32 2.097(6) . ? 
Ir P1 2.2339(16) . ? 
Ir P2 2.2770(15) . ? 
Ir N 2.293(5) . ? 
Ir H1 1.44(7) . ? 
Ir H2 1.65(9) . ? 
P1 C12 1.833(6) . ? 
P1 C52 1.841(7) . ? 
P1 C51 1.859(7) . ? 
P2 C22 1.823(6) . ? 
P2 C42 1.854(6) . ? 
P2 C41 1.856(6) . ? 
C11 C16 1.393(8) . ? 
C11 C12 1.401(8) . ? 
C11 N 1.472(7) . ? 
C12 C13 1.402(8) . ? 
C13 C14 1.390(9) . ? 
C13 H13 0.9500 . ? 
C14 C15 1.389(9) . ? 
C14 C17 1.500(8) . ? 
C15 C16 1.382(8) . ? 
C15 H15 0.9500 . ? 
C16 H16 0.9500 . ? 
C17 H17A 0.9800 . ? 
C17 H17B 0.9800 . ? 
C17 H17C 0.9800 . ? 
N C21 1.467(8) . ? 
N C31 1.523(8) . ? 
C27 C24 1.510(9) . ? 
C27 H27A 0.9800 . ? 
C27 H27B 0.9800 . ? 
C27 H27C 0.9800 . ? 
C26 C25 1.394(9) . ? 
C26 C21 1.399(9) . ? 
C26 H26 0.9500 . ? 
C25 C24 1.370(9) . ? 
C25 H25 0.9500 . ? 
C24 C23 1.395(9) . ? 
C23 C22 1.399(8) . ? 
C23 H23 0.9500 . ? 
C22 C21 1.414(8) . ? 
C34 C33 1.390(9) . ? 
C34 C35 1.393(9) . ? 
C34 H34 0.9500 . ? 
C33 C32 1.398(9) . ? 
C33 H33 0.9500 . ? 
C32 C31 1.403(8) . ? 
C31 C36 1.407(9) . ? 
C35 C36 1.392(9) . ? 
C35 H35 0.9500 . ? 
C37 C36 1.508(8) . ? 
C37 H37A 0.9800 . ? 
C37 H37B 0.9800 . ? 
C37 H37C 0.9800 . ? 
C41 C44 1.517(8) . ? 
C41 C43 1.542(8) . ? 
C41 H41 1.0000 . ? 
C42 C46 1.510(9) . ? 
C42 C45 1.528(10) . ? 
C42 H42 1.0000 . ? 
C43 H43A 0.9800 . ? 
C43 H43B 0.9800 . ? 
C43 H43C 0.9800 . ? 
C44 H44A 0.9800 . ? 
C44 H44B 0.9800 . ? 
C44 H44C 0.9800 . ? 
C45 H45A 0.9800 . ? 
C45 H45B 0.9800 . ? 
C45 H45C 0.9800 . ? 
C46 H46A 0.9800 . ? 
C46 H46B 0.9800 . ? 
C46 H46C 0.9800 . ? 
C51 C54 1.434(11) . ? 
C51 C53 1.539(10) . ? 
C51 H51 1.0000 . ? 
C52 C56 1.517(11) . ? 
C52 C55 1.525(10) . ? 
C52 H52 1.0000 . ? 
C53 H53A 0.9800 . ? 
C53 H53B 0.9800 . ? 
C53 H53C 0.9800 . ? 
C54 H54A 0.9800 . ? 
C54 H54B 0.9800 . ? 
C54 H54C 0.9800 . ? 
C55 H55A 0.9800 . ? 
C55 H55B 0.9800 . ? 
C55 H55C 0.9800 . ? 
C56 H56A 0.9800 . ? 
C56 H56B 0.9800 . ? 
C56 H56C 0.9800 . ? 
 
loop_ 
 _geom_angle_atom_site_label_1 
 _geom_angle_atom_site_label_2 
 _geom_angle_atom_site_label_3 
 _geom_angle 
 _geom_angle_site_symmetry_1 
 _geom_angle_site_symmetry_3 
 _geom_angle_publ_flag 
C32 Ir P1 93.67(17) . . ? 
C32 Ir P2 87.39(17) . . ? 
P1 Ir P2 166.22(6) . . ? 
C32 Ir N 65.0(2) . . ? 
P1 Ir N 85.35(13) . . ? 
P2 Ir N 82.66(13) . . ? 
C32 Ir H1 103(3) . . ? 
P1 Ir H1 103(3) . . ? 
P2 Ir H1 90(3) . . ? 
N Ir H1 166(3) . . ? 
C32 Ir H2 173(3) . . ? 
P1 Ir H2 94(3) . . ? 
P2 Ir H2 85(3) . . ? 
N Ir H2 114(3) . . ? 
H1 Ir H2 77(4) . . ? 
C12 P1 C52 104.6(3) . . ? 
C12 P1 C51 103.1(3) . . ? 
C52 P1 C51 105.6(4) . . ? 
C12 P1 Ir 101.7(2) . . ? 
C52 P1 Ir 122.2(2) . . ? 
C51 P1 Ir 117.1(3) . . ? 
C22 P2 C42 103.0(3) . . ? 
C22 P2 C41 105.4(3) . . ? 
C42 P2 C41 107.1(3) . . ? 
C22 P2 Ir 100.6(2) . . ? 
C42 P2 Ir 120.2(2) . . ? 
C41 P2 Ir 118.1(2) . . ? 
C16 C11 C12 118.6(5) . . ? 
C16 C11 N 121.3(5) . . ? 
C12 C11 N 119.9(5) . . ? 
C11 C12 C13 118.4(6) . . ? 
C11 C12 P1 120.0(5) . . ? 
C13 C12 P1 121.4(5) . . ? 
C14 C13 C12 123.1(6) . . ? 
C14 C13 H13 118.4 . . ? 
C12 C13 H13 118.4 . . ? 
C15 C14 C13 117.0(6) . . ? 
C15 C14 C17 121.6(6) . . ? 
C13 C14 C17 121.4(6) . . ? 
C16 C15 C14 121.3(6) . . ? 
C16 C15 H15 119.4 . . ? 
C14 C15 H15 119.4 . . ? 
C15 C16 C11 121.4(6) . . ? 
C15 C16 H16 119.3 . . ? 
C11 C16 H16 119.3 . . ? 
C14 C17 H17A 109.5 . . ? 
C14 C17 H17B 109.5 . . ? 
H17A C17 H17B 109.5 . . ? 
C14 C17 H17C 109.5 . . ? 
H17A C17 H17C 109.5 . . ? 
H17B C17 H17C 109.5 . . ? 
C21 N C11 119.8(5) . . ? 
C21 N C31 113.7(5) . . ? 
C11 N C31 109.9(4) . . ? 
C21 N Ir 109.5(3) . . ? 
C11 N Ir 112.0(3) . . ? 
C31 N Ir 87.4(3) . . ? 
C24 C27 H27A 109.5 . . ? 
C24 C27 H27B 109.5 . . ? 
H27A C27 H27B 109.5 . . ? 
C24 C27 H27C 109.5 . . ? 
H27A C27 H27C 109.5 . . ? 
H27B C27 H27C 109.5 . . ? 
C25 C26 C21 120.7(6) . . ? 
C25 C26 H26 119.7 . . ? 
C21 C26 H26 119.7 . . ? 
C24 C25 C26 121.2(6) . . ? 
C24 C25 H25 119.4 . . ? 
C26 C25 H25 119.4 . . ? 
C25 C24 C23 118.1(6) . . ? 
C25 C24 C27 121.3(6) . . ? 
C23 C24 C27 120.5(6) . . ? 
C24 C23 C22 122.5(6) . . ? 
C24 C23 H23 118.7 . . ? 
C22 C23 H23 118.7 . . ? 
C23 C22 C21 118.1(5) . . ? 
C23 C22 P2 121.8(5) . . ? 
C21 C22 P2 119.2(5) . . ? 
C26 C21 C22 118.8(6) . . ? 
C26 C21 N 123.9(5) . . ? 
C22 C21 N 117.3(5) . . ? 
C33 C34 C35 120.8(6) . . ? 
C33 C34 H34 119.6 . . ? 
C35 C34 H34 119.6 . . ? 
C34 C33 C32 120.2(6) . . ? 
C34 C33 H33 119.9 . . ? 
C32 C33 H33 119.9 . . ? 
C33 C32 C31 116.3(6) . . ? 
C33 C32 Ir 144.5(5) . . ? 
C31 C32 Ir 98.7(4) . . ? 
C32 C31 C36 125.6(6) . . ? 
C32 C31 N 107.7(5) . . ? 
C36 C31 N 126.6(5) . . ? 
C36 C35 C34 122.2(6) . . ? 
C36 C35 H35 118.9 . . ? 
C34 C35 H35 118.9 . . ? 
C36 C37 H37A 109.5 . . ? 
C36 C37 H37B 109.5 . . ? 
H37A C37 H37B 109.5 . . ? 
C36 C37 H37C 109.5 . . ? 
H37A C37 H37C 109.5 . . ? 
H37B C37 H37C 109.5 . . ? 
C35 C36 C31 114.6(6) . . ? 
C35 C36 C37 118.7(6) . . ? 
C31 C36 C37 126.7(6) . . ? 
C44 C41 C43 110.6(5) . . ? 
C44 C41 P2 111.3(4) . . ? 
C43 C41 P2 115.1(4) . . ? 
C44 C41 H41 106.4 . . ? 
C43 C41 H41 106.4 . . ? 
P2 C41 H41 106.4 . . ? 
C46 C42 C45 110.0(6) . . ? 
C46 C42 P2 112.0(4) . . ? 
C45 C42 P2 108.6(5) . . ? 
C46 C42 H42 108.7 . . ? 
C45 C42 H42 108.7 . . ? 
P2 C42 H42 108.7 . . ? 
C41 C43 H43A 109.5 . . ? 
C41 C43 H43B 109.5 . . ? 
H43A C43 H43B 109.5 . . ? 
C41 C43 H43C 109.5 . . ? 
H43A C43 H43C 109.5 . . ? 
H43B C43 H43C 109.5 . . ? 
C41 C44 H44A 109.5 . . ? 
C41 C44 H44B 109.5 . . ? 
H44A C44 H44B 109.5 . . ? 
C41 C44 H44C 109.5 . . ? 
H44A C44 H44C 109.5 . . ? 
H44B C44 H44C 109.5 . . ? 
C42 C45 H45A 109.5 . . ? 
C42 C45 H45B 109.5 . . ? 
H45A C45 H45B 109.5 . . ? 
C42 C45 H45C 109.5 . . ? 
H45A C45 H45C 109.5 . . ? 
H45B C45 H45C 109.5 . . ? 
C42 C46 H46A 109.5 . . ? 
C42 C46 H46B 109.5 . . ? 
H46A C46 H46B 109.5 . . ? 
C42 C46 H46C 109.5 . . ? 
H46A C46 H46C 109.5 . . ? 
H46B C46 H46C 109.5 . . ? 
C54 C51 C53 111.0(7) . . ? 
C54 C51 P1 122.3(6) . . ? 
C53 C51 P1 110.8(5) . . ? 
C54 C51 H51 103.4 . . ? 
C53 C51 H51 103.4 . . ? 
P1 C51 H51 103.4 . . ? 
C56 C52 C55 110.8(7) . . ? 
C56 C52 P1 112.1(5) . . ? 
C55 C52 P1 109.9(5) . . ? 
C56 C52 H52 108.0 . . ? 
C55 C52 H52 108.0 . . ? 
P1 C52 H52 108.0 . . ? 
C51 C53 H53A 109.5 . . ? 
C51 C53 H53B 109.5 . . ? 
H53A C53 H53B 109.5 . . ? 
C51 C53 H53C 109.5 . . ? 
H53A C53 H53C 109.5 . . ? 
H53B C53 H53C 109.5 . . ? 
C51 C54 H54A 109.5 . . ? 
C51 C54 H54B 109.5 . . ? 
H54A C54 H54B 109.5 . . ? 
C51 C54 H54C 109.5 . . ? 
H54A C54 H54C 109.5 . . ? 
H54B C54 H54C 109.5 . . ? 
C52 C55 H55A 109.5 . . ? 
C52 C55 H55B 109.5 . . ? 
H55A C55 H55B 109.5 . . ? 
C52 C55 H55C 109.5 . . ? 
H55A C55 H55C 109.5 . . ? 
H55B C55 H55C 109.5 . . ? 
C52 C56 H56A 109.5 . . ? 
C52 C56 H56B 109.5 . . ? 
H56A C56 H56B 109.5 . . ? 
C52 C56 H56C 109.5 . . ? 
H56A C56 H56C 109.5 . . ? 
H56B C56 H56C 109.5 . . ? 
 
_diffrn_measured_fraction_theta_max    0.995 
_diffrn_reflns_theta_full              25.00 
_diffrn_measured_fraction_theta_full   0.995 
_refine_diff_density_max    3.282 
_refine_diff_density_min   -0.909 
_refine_diff_density_rms    0.158 


# SQUEEZE RESULTS 
# Note: Data are Listed for all Voids in the P2(1)/n Unit Cell
# i.e. Centre of Gravity, Solvent Accessible Volume,
# Recovered number of Electrons in the Void and
# Details about the Squeezed Material
loop_
  _platon_squeeze_void_nr                          
  _platon_squeeze_void_average_x                   
  _platon_squeeze_void_average_y                   
  _platon_squeeze_void_average_z                   
  _platon_squeeze_void_volume                      
  _platon_squeeze_void_count_electrons             
  _platon_squeeze_void_content                     
   1 -0.000 -0.000 -0.000       177        41 ' '
   2 -0.000  0.500  0.500       177        41 ' '
   3  0.500  1.000  0.500       177        41 ' '
   4  0.500  0.500  1.000       177        41 ' '
_platon_squeeze_details                           ?


_iucr_refine_instructions_details
;
TITL Sv360 in P2(1)/n
CELL 0.71073  11.60480  10.32720  28.57100  90.0000 100.4921  90.0000
ZERR    4.00   0.00130   0.00110   0.00310   0.0000   0.0019   0.0000
LATT  1
SYMM 0.5-X, 0.5+Y, 0.5-Z
SFAC C H N P IR
UNIT 132 192 4 8 4
LIST 6 ! automatically inserted. Change 6 to 4 for CHECKCIF!!
TEMP -153.150
Size 0.027 0.025 0.022
Bond $H
 
L.S. 4
BOND
FMAP 2
PLAN 20
Omit 0 50
Omit -1 2 1
Omit 1 1 2
Acta 50
 
WGHT    0.053200    9.063207
FVAR       0.06620   1.02416
MOLE   1
IR    5    0.403070    0.961163    0.157044    11.00000    0.01614    0.01104 =
         0.01164   -0.00060    0.00233    0.00174
H1    2    0.396055    1.083270    0.180489    11.00000    0.02271
P1    4    0.308792    0.999291    0.082949    11.00000    0.02361    0.01088 =
         0.01315    0.00043    0.00127    0.00254
H2    2    0.280976    0.948188    0.178688    11.00000    0.05860
P2    4    0.491193    0.871725    0.227340    11.00000    0.01531    0.01161 =
         0.01192   -0.00041    0.00264    0.00124
C11   1    0.403476    0.750821    0.076961    11.00000    0.01576    0.01235 =
         0.01386    0.00053    0.00267   -0.00401
C12   1    0.326548    0.844626    0.053621    11.00000    0.01902    0.01426 =
         0.01844   -0.00133    0.00438   -0.00400
C13   1    0.271859    0.821065    0.006457    11.00000    0.02289    0.01375 =
         0.01597    0.00227   -0.00062    0.00027
AFIX  43
H13   2    0.218043    0.883505   -0.009110    11.00000   -1.20000
AFIX   0
C14   1    0.292616    0.710728   -0.018607    11.00000    0.02160    0.01683 =
         0.01393   -0.00219    0.00472   -0.00275
C15   1    0.374441    0.623330    0.004681    11.00000    0.02657    0.01424 =
         0.01855   -0.00681    0.00522    0.00091
AFIX  43
H15   2    0.392641    0.548040   -0.011640    11.00000   -1.20000
AFIX   0
C16   1    0.429899    0.643804    0.051150    11.00000    0.01935    0.01609 =
         0.01330   -0.00146   -0.00021    0.00066
AFIX  43
H16   2    0.487239    0.583648    0.065800    11.00000   -1.20000
AFIX   0
C17   1    0.230603    0.688124   -0.068748    11.00000    0.03439    0.01660 =
         0.02064   -0.00242   -0.00365    0.00160
AFIX 137
H17A  2    0.288446    0.672737   -0.089206    11.00000   -1.50000
H17B  2    0.183538    0.764431   -0.080131    11.00000   -1.50000
H17C  2    0.179303    0.612434   -0.069671    11.00000   -1.50000
AFIX   0
N     3    0.462005    0.771972    0.126572    11.00000    0.01398    0.01428 =
         0.01258    0.00139    0.00407   -0.00018
C27   1    0.505051    0.368652    0.269424    11.00000    0.02951    0.01508 =
         0.02365    0.00392   -0.00010   -0.00254
AFIX 137
H27A  2    0.469994    0.287565    0.255810    11.00000   -1.50000
H27B  2    0.467281    0.395146    0.295910    11.00000   -1.50000
H27C  2    0.589042    0.355701    0.281055    11.00000   -1.50000
AFIX   0
C26   1    0.434568    0.539167    0.149819    11.00000    0.01949    0.01978 =
         0.02019   -0.00600    0.00368   -0.00419
AFIX  43
H26   2    0.406076    0.516574    0.117555    11.00000   -1.20000
AFIX   0
C25   1    0.446501    0.443738    0.184856    11.00000    0.02176    0.01174 =
         0.02205   -0.00250    0.00764   -0.00059
AFIX  43
H25   2    0.425560    0.356970    0.176095    11.00000   -1.20000
AFIX   0
C24   1    0.487852    0.472689    0.231682    11.00000    0.01549    0.01690 =
         0.02479    0.00065    0.00448    0.00171
C23   1    0.508972    0.602371    0.244036    11.00000    0.01616    0.01743 =
         0.01534    0.00127    0.00212    0.00277
AFIX  43
H23   2    0.533683    0.623914    0.276646    11.00000   -1.20000
AFIX   0
C22   1    0.495166    0.701904    0.210259    11.00000    0.01099    0.01316 =
         0.01653   -0.00391    0.00189   -0.00138
C21   1    0.464110    0.667886    0.161665    11.00000    0.01609    0.01711 =
         0.01497    0.00200    0.00274    0.00048
C34   1    0.771813    0.989971    0.129607    11.00000    0.02097    0.02543 =
         0.02241    0.00075    0.00145   -0.01083
AFIX  43
H34   2    0.838204    1.043483    0.129188    11.00000   -1.20000
AFIX   0
C33   1    0.667591    1.045243    0.137254    11.00000    0.02747    0.01339 =
         0.01389   -0.00158    0.00245   -0.00308
AFIX  43
H33   2    0.663163    1.136048    0.141944    11.00000   -1.20000
AFIX   0
C32   1    0.569245    0.967592    0.138062    11.00000    0.01897    0.02080 =
         0.00857   -0.00245    0.00157    0.00021
C31   1    0.580638    0.835985    0.127607    11.00000    0.01872    0.01518 =
         0.01169    0.00317    0.00548   -0.00230
C35   1    0.780077    0.857105    0.122554    11.00000    0.01337    0.03022 =
         0.02286    0.00136    0.00661    0.00323
AFIX  43
H35   2    0.853483    0.821516    0.119005    11.00000   -1.20000
AFIX   0
C37   1    0.701124    0.632036    0.112671    11.00000    0.02008    0.01628 =
         0.02714   -0.00825    0.00435   -0.00057
AFIX 137
H37A  2    0.678981    0.612275    0.078671    11.00000   -1.50000
H37B  2    0.651769    0.582074    0.130511    11.00000   -1.50000
H37C  2    0.783523    0.609064    0.123724    11.00000   -1.50000
AFIX   0
C36   1    0.684345    0.774698    0.120531    11.00000    0.01964    0.02080 =
         0.01185   -0.00396    0.00279   -0.00340
C41   1    0.645771    0.916275    0.251079    11.00000    0.01388    0.01490 =
         0.01835   -0.00173   -0.00130    0.00177
AFIX  13
H41   2    0.691988    0.890595    0.226245    11.00000   -1.20000
AFIX   0
C42   1    0.413578    0.866948    0.278601    11.00000    0.02605    0.02067 =
         0.01257    0.00096    0.00735    0.00638
AFIX  13
H42   2    0.465587    0.824420    0.306054    11.00000   -1.20000
AFIX   0
C43   1    0.701897    0.845582    0.297161    11.00000    0.01869    0.02032 =
         0.02259   -0.00032   -0.00624   -0.00150
AFIX 137
H43A  2    0.694252    0.751817    0.292293    11.00000   -1.50000
H43B  2    0.662046    0.871406    0.323129    11.00000   -1.50000
H43C  2    0.785060    0.868602    0.305345    11.00000   -1.50000
AFIX   0
C44   1    0.659863    1.061710    0.257111    11.00000    0.02914    0.01624 =
         0.02690    0.00249   -0.00167   -0.00048
AFIX 137
H44A  2    0.621359    1.105135    0.227925    11.00000   -1.50000
H44B  2    0.743400    1.083741    0.263446    11.00000   -1.50000
H44C  2    0.623934    1.090192    0.283858    11.00000   -1.50000
AFIX   0
C45   1    0.389518    1.005807    0.292546    11.00000    0.05818    0.03370 =
         0.03770    0.00037    0.03337    0.00868
AFIX 137
H45A  2    0.356113    1.055065    0.263969    11.00000   -1.50000
H45B  2    0.462998    1.046360    0.308003    11.00000   -1.50000
H45C  2    0.334008    1.005076    0.314612    11.00000   -1.50000
AFIX   0
C46   1    0.300177    0.792091    0.267332    11.00000    0.02378    0.03708 =
         0.02715    0.00307    0.01002   -0.00208
AFIX 137
H46A  2    0.248314    0.833016    0.240503    11.00000   -1.50000
H46B  2    0.262017    0.791845    0.295238    11.00000   -1.50000
H46C  2    0.316580    0.702814    0.258939    11.00000   -1.50000
AFIX   0
C51   1    0.376516    1.117541    0.047009    11.00000    0.07857    0.01595 =
         0.02403    0.00204    0.01964   -0.01240
AFIX  13
H51   2    0.454136    1.077647    0.045261    11.00000   -1.20000
AFIX   0
C52   1    0.150273    1.031730    0.069157    11.00000    0.02783    0.02961 =
         0.02335   -0.00351   -0.00475    0.01258
AFIX  13
H52   2    0.128521    1.049846    0.034281    11.00000   -1.20000
AFIX   0
C53   1    0.409638    1.243208    0.075184    11.00000    0.09286    0.03182 =
         0.03836    0.00211    0.01133   -0.01863
AFIX 137
H53A  2    0.461800    1.294967    0.059231    11.00000   -1.50000
H53B  2    0.449720    1.221846    0.107486    11.00000   -1.50000
H53C  2    0.338489    1.292854    0.076783    11.00000   -1.50000
AFIX   0
C54   1    0.327776    1.144953   -0.001786    11.00000    0.09286    0.03182 =
         0.03836    0.00211    0.01133   -0.01863
AFIX 137
H54A  2    0.380053    1.203656   -0.014960    11.00000   -1.50000
H54B  2    0.250852    1.185840   -0.003700    11.00000   -1.50000
H54C  2    0.319114    1.064095   -0.020043    11.00000   -1.50000
AFIX   0
C55   1    0.121787    1.151894    0.095891    11.00000    0.03601    0.04412 =
         0.07052   -0.01750    0.00301    0.02299
AFIX 137
H55A  2    0.165088    1.226216    0.086612    11.00000   -1.50000
H55B  2    0.144492    1.137334    0.130229    11.00000   -1.50000
H55C  2    0.037472    1.169369    0.088014    11.00000   -1.50000
AFIX   0
C56   1    0.078743    0.916623    0.080371    11.00000    0.02455    0.05702 =
         0.04252   -0.01175    0.00365   -0.00225
AFIX 137
H56A  2   -0.004797    0.938432    0.073099    11.00000   -1.50000
H56B  2    0.100866    0.894797    0.114198    11.00000   -1.50000
H56C  2    0.093954    0.842285    0.061060    11.00000   -1.50000
MOLE   2
HKLF 4
 
REM  Sv360 in P2(1)/n
REM R1 =  0.0368 for   4814 Fo > 4sig(Fo)  and  0.0516 for all   5897 data
REM    348 parameters refined using      0 restraints
 
END  
     
WGHT      0.0532      9.0767 
REM Highest difference peak  3.282,  deepest hole -0.909,  1-sigma level  0.158
Q1    1   0.1230  0.5401  0.0671  11.00000  0.05    3.28
Q2    1   0.0238  0.4436 -0.0146  11.00000  0.05    2.07
Q3    1   0.0426  0.4607  0.0067  11.00000  0.05    1.58
Q4    1   0.4379  1.0819  0.0156  11.00000  0.05    1.57
Q5    1   0.5682  0.9610  0.1225  11.00000  0.05    0.76
Q6    1   0.4295  0.9573  0.1271  11.00000  0.05    0.61
Q7    1   0.4540  1.0338  0.1676  11.00000  0.05    0.57
Q8    1   0.3796  0.9637  0.1872  11.00000  0.05    0.57
Q9    1   0.3237  0.9542  0.1510  11.00000  0.05    0.52
Q10   1   0.2456  1.0289  0.2477  11.00000  0.05    0.51
Q11   1   0.7023  1.0591  0.2579  11.00000  0.05    0.47
Q12   1   0.0234  0.7595  0.0076  11.00000  0.05    0.47
Q13   1   0.3098  1.1158  0.0343  11.00000  0.05    0.47
Q14   1   0.4478  0.8874  0.2564  11.00000  0.05    0.45
Q15   1   0.4757  1.1447 -0.0104  11.00000  0.05    0.44
Q16   1   0.2611  0.8644 -0.0094  11.00000  0.05    0.44
Q17   1   0.3702  0.8799  0.1451  11.00000  0.05    0.44
Q18   1   0.3873  1.0330  0.1389  11.00000  0.05    0.43
Q19   1   0.9368  0.7430  0.0879  11.00000  0.05    0.43
Q20   1   0.5829  0.3804  0.2961  11.00000  0.05    0.41

;


 
data_sv487 
 
_audit_creation_method            SHELXL-97 
_chemical_name_systematic 
; 
 ? 
; 
_chemical_name_common             ? 
_chemical_melting_point           ? 
_chemical_formula_moiety          ? 
_chemical_formula_sum 
 'C33 H48 Ir N P2' 
_chemical_formula_weight          712.86 
 
loop_ 
 _atom_type_symbol 
 _atom_type_description 
 _atom_type_scat_dispersion_real 
 _atom_type_scat_dispersion_imag 
 _atom_type_scat_source 
 'C'  'C'   0.0033   0.0016 
 'International Tables Vol C Tables 4.2.6.8 and 6.1.1.4' 
 'H'  'H'   0.0000   0.0000 
 'International Tables Vol C Tables 4.2.6.8 and 6.1.1.4' 
 'N'  'N'   0.0061   0.0033 
 'International Tables Vol C Tables 4.2.6.8 and 6.1.1.4' 
 'P'  'P'   0.1023   0.0942 
 'International Tables Vol C Tables 4.2.6.8 and 6.1.1.4' 
 'Ir'  'Ir'  -1.4442   7.9887 
 'International Tables Vol C Tables 4.2.6.8 and 6.1.1.4' 
 
_symmetry_cell_setting            'monoclinic' 
_symmetry_space_group_name_H-M    'P2(1)/n' 
 
loop_ 
 _symmetry_equiv_pos_as_xyz 
 'x, y, z' 
 '-x+1/2, y+1/2, -z+1/2' 
 '-x, -y, -z' 
 'x-1/2, -y-1/2, z-1/2' 
 
_cell_length_a                    9.9207(8) 
_cell_length_b                    18.8543(15) 
_cell_length_c                    16.6440(14) 
_cell_angle_alpha                 90.00 
_cell_angle_beta                  94.9652(17) 
_cell_angle_gamma                 90.00 
_cell_volume                      3101.5(4) 
_cell_formula_units_Z             4 
_cell_measurement_temperature     120(2) 
_cell_measurement_reflns_used     9165 
_cell_measurement_theta_min       2.30 
_cell_measurement_theta_max       26.42 
 
_exptl_crystal_description        'block' 
_exptl_crystal_colour             ? 
_exptl_crystal_size_max           0.09 
_exptl_crystal_size_mid           0.09 
_exptl_crystal_size_min           0.08 
_exptl_crystal_density_meas       ? 
_exptl_crystal_density_diffrn     1.527 
_exptl_crystal_density_method     'not measured' 
_exptl_crystal_F_000              1440 
_exptl_absorpt_coefficient_mu     4.430 
_exptl_absorpt_correction_type    'multi-scan' 
_exptl_absorpt_correction_T_min   0.6217 
_exptl_absorpt_correction_T_max   0.7454 
_exptl_absorpt_process_details    'Bruker AXS area detector scaling and absorption correction' 
 
_exptl_special_details 
; 
 ? 
; 
 
_diffrn_ambient_temperature       120(2) 
_diffrn_radiation_wavelength      0.71073 
_diffrn_radiation_type            MoK\a 
_diffrn_radiation_source          'fine-focus sealed tube' 
_diffrn_radiation_monochromator   graphite 
_diffrn_measurement_device_type   'Bruker APEX-II' 
_diffrn_measurement_method        ? 
_diffrn_detector_area_resol_mean  ? 
_diffrn_standards_number          ? 
_diffrn_standards_interval_count  ? 
_diffrn_standards_interval_time   ? 
_diffrn_standards_decay_%         ? 
_diffrn_reflns_number             26785 
_diffrn_reflns_av_R_equivalents   0.0401 
_diffrn_reflns_av_sigmaI/netI     0.0306 
_diffrn_reflns_limit_h_min        -11 
_diffrn_reflns_limit_h_max        11 
_diffrn_reflns_limit_k_min        -21 
_diffrn_reflns_limit_k_max        22 
_diffrn_reflns_limit_l_min        -19 
_diffrn_reflns_limit_l_max        19 
_diffrn_reflns_theta_min          1.64 
_diffrn_reflns_theta_max          25.00 
_reflns_number_total              5462 
_reflns_number_gt                 4660 
_reflns_threshold_expression      >2sigma(I) 
 
_computing_data_collection        ? 
_computing_cell_refinement        ? 
_computing_data_reduction         ? 
_computing_structure_solution     'SHELXS-97 (Sheldrick, 1990)' 
_computing_structure_refinement   'SHELXL-97 (Sheldrick, 1997)' 
_computing_molecular_graphics     ? 
_computing_publication_material   ? 
 
_refine_special_details 
; 
 Refinement of F^2^ against ALL reflections.  The weighted R-factor wR and 
 goodness of fit S are based on F^2^, conventional R-factors R are based 
 on F, with F set to zero for negative F^2^. The threshold expression of 
 F^2^ > 2sigma(F^2^) is used only for calculating R-factors(gt) etc. and is 
 not relevant to the choice of reflections for refinement.  R-factors based 
 on F^2^ are statistically about twice as large as those based on F, and R- 
 factors based on ALL data will be even larger. 
; 
 
_refine_ls_structure_factor_coef  Fsqd  
_refine_ls_matrix_type            full 
_refine_ls_weighting_scheme       calc  
_refine_ls_weighting_details 
 'calc w=1/[\s^2^(Fo^2^)+(0.0204P)^2^+1.8656P] where P=(Fo^2^+2Fc^2^)/3' 
_atom_sites_solution_primary      direct 
_atom_sites_solution_secondary    difmap 
_atom_sites_solution_hydrogens    geom 
_refine_ls_hydrogen_treatment     mixed 
_refine_ls_extinction_method      none 
_refine_ls_extinction_coef        ? 
_refine_ls_number_reflns          5462 
_refine_ls_number_parameters      351 
_refine_ls_number_restraints      0 
_refine_ls_R_factor_all           0.0310 
_refine_ls_R_factor_gt            0.0224 
_refine_ls_wR_factor_ref          0.0470 
_refine_ls_wR_factor_gt           0.0453 
_refine_ls_goodness_of_fit_ref    1.033 
_refine_ls_restrained_S_all       1.033 
_refine_ls_shift/su_max           0.002 
_refine_ls_shift/su_mean          0.000 
 
loop_ 
 _atom_site_label 
 _atom_site_type_symbol 
 _atom_site_fract_x 
 _atom_site_fract_y 
 _atom_site_fract_z 
 _atom_site_U_iso_or_equiv 
 _atom_site_adp_type 
 _atom_site_occupancy 
 _atom_site_symmetry_multiplicity 
 _atom_site_calc_flag 
 _atom_site_refinement_flags 
 _atom_site_disorder_assembly 
 _atom_site_disorder_group 
Ir Ir 0.779693(13) 0.204398(7) 0.426995(7) 0.01343(5) Uani 1 1 d . . . 
P2 P 0.71144(9) 0.11001(5) 0.35411(5) 0.01409(19) Uani 1 1 d . . . 
H2 H 0.835(3) 0.1474(18) 0.491(2) 0.032(10) Uiso 1 1 d . . . 
P1 P 0.81675(9) 0.27276(5) 0.53856(5) 0.01524(19) Uani 1 1 d . . . 
H1 H 0.900(3) 0.2089(16) 0.4097(19) 0.018 Uiso 1 1 d . . . 
N N 0.5623(3) 0.21401(13) 0.45766(15) 0.0128(6) Uani 1 1 d . . . 
C11 C 0.4733(3) 0.16294(17) 0.41004(19) 0.0140(7) Uani 1 1 d . . . 
C12 C 0.5293(3) 0.10945(17) 0.36579(18) 0.0136(7) Uani 1 1 d . . . 
C13 C 0.4429(3) 0.05809(18) 0.32871(19) 0.0184(8) Uani 1 1 d . . . 
H13 H 0.4817 0.0198 0.3017 0.022 Uiso 1 1 calc R . . 
C14 C 0.3046(3) 0.06057(18) 0.32964(19) 0.0190(8) Uani 1 1 d . . . 
C15 C 0.2504(3) 0.11895(18) 0.36764(19) 0.0178(8) Uani 1 1 d . . . 
H15 H 0.1550 0.1244 0.3658 0.021 Uiso 1 1 calc R . . 
C16 C 0.3332(3) 0.16855(18) 0.40766(19) 0.0161(7) Uani 1 1 d . . . 
H16 H 0.2940 0.2071 0.4340 0.019 Uiso 1 1 calc R . . 
C17 C 0.2178(4) 0.00231(19) 0.2914(2) 0.0264(9) Uani 1 1 d . . . 
H17A H 0.1399 0.0231 0.2596 0.040 Uiso 1 1 calc R . . 
H17B H 0.1861 -0.0282 0.3336 0.040 Uiso 1 1 calc R . . 
H17C H 0.2710 -0.0260 0.2561 0.040 Uiso 1 1 calc R . . 
C21 C 0.5692(3) 0.20376(17) 0.54672(19) 0.0149(7) Uani 1 1 d . . . 
C22 C 0.6773(3) 0.23711(17) 0.5932(2) 0.0152(7) Uani 1 1 d . . . 
C23 C 0.6823(4) 0.23092(18) 0.6767(2) 0.0177(8) Uani 1 1 d . . . 
H23 H 0.7525 0.2546 0.7086 0.021 Uiso 1 1 calc R . . 
C24 C 0.5882(4) 0.19131(18) 0.7157(2) 0.0194(8) Uani 1 1 d . . . 
C3 C 0.6944(4) 0.27992(17) 0.3366(2) 0.0199(8) Uani 1 1 d . . . 
H3A H 0.7653 0.3129 0.3211 0.024 Uiso 1 1 calc R . . 
H3B H 0.6563 0.2545 0.2878 0.024 Uiso 1 1 calc R . . 
C25 C 0.4858(4) 0.15878(17) 0.6683(2) 0.0198(8) Uani 1 1 d . . . 
H25 H 0.4208 0.1314 0.6932 0.024 Uiso 1 1 calc R . . 
C26 C 0.4751(3) 0.16498(17) 0.5846(2) 0.0179(8) Uani 1 1 d . . . 
H26 H 0.4026 0.1424 0.5534 0.022 Uiso 1 1 calc R . . 
C27 C 0.6020(4) 0.1834(2) 0.8068(2) 0.0268(9) Uani 1 1 d . . . 
H27A H 0.5702 0.1363 0.8214 0.040 Uiso 1 1 calc R . . 
H27B H 0.5475 0.2198 0.8308 0.040 Uiso 1 1 calc R . . 
H27C H 0.6971 0.1890 0.8270 0.040 Uiso 1 1 calc R . . 
C32 C 0.5857(4) 0.31982(18) 0.3741(2) 0.0183(8) Uani 1 1 d . . . 
C31 C 0.5216(3) 0.28791(17) 0.4362(2) 0.0162(7) Uani 1 1 d . . . 
C33 C 0.5510(4) 0.39026(18) 0.3565(2) 0.0252(9) Uani 1 1 d . . . 
H33 H 0.5899 0.4134 0.3134 0.030 Uiso 1 1 calc R . . 
C34 C 0.4614(4) 0.42748(19) 0.4003(2) 0.0284(9) Uani 1 1 d . . . 
H34 H 0.4422 0.4758 0.3880 0.034 Uiso 1 1 calc R . . 
C36 C 0.4287(3) 0.32441(18) 0.4795(2) 0.0197(8) Uani 1 1 d . . . 
H36 H 0.3857 0.3011 0.5209 0.024 Uiso 1 1 calc R . . 
C42 C 0.9713(3) 0.25662(18) 0.6069(2) 0.0191(8) Uani 1 1 d . . . 
H42 H 0.9638 0.2846 0.6574 0.023 Uiso 1 1 calc R . . 
C43 C 0.8696(4) 0.40882(19) 0.4777(2) 0.0310(10) Uani 1 1 d . . . 
H43A H 0.8550 0.3842 0.4259 0.046 Uiso 1 1 calc R . . 
H43B H 0.9663 0.4087 0.4957 0.046 Uiso 1 1 calc R . . 
H43C H 0.8376 0.4579 0.4716 0.046 Uiso 1 1 calc R . . 
C44 C 0.8138(4) 0.40516(19) 0.6232(2) 0.0306(9) Uani 1 1 d . . . 
H44A H 0.7869 0.4551 0.6195 0.046 Uiso 1 1 calc R . . 
H44B H 0.9097 0.4018 0.6427 0.046 Uiso 1 1 calc R . . 
H44C H 0.7591 0.3805 0.6609 0.046 Uiso 1 1 calc R . . 
C45 C 1.0954(4) 0.2828(2) 0.5676(2) 0.0308(10) Uani 1 1 d . . . 
H45A H 1.0983 0.2603 0.5147 0.046 Uiso 1 1 calc R . . 
H45B H 1.1773 0.2705 0.6019 0.046 Uiso 1 1 calc R . . 
H45C H 1.0902 0.3344 0.5609 0.046 Uiso 1 1 calc R . . 
C46 C 0.9915(4) 0.17896(19) 0.6301(2) 0.0310(10) Uani 1 1 d . . . 
H46A H 1.0122 0.1516 0.5826 0.047 Uiso 1 1 calc R . . 
H46B H 0.9087 0.1605 0.6505 0.047 Uiso 1 1 calc R . . 
H46C H 1.0667 0.1748 0.6720 0.047 Uiso 1 1 calc R . . 
C51 C 0.7643(3) 0.02061(18) 0.3892(2) 0.0215(8) Uani 1 1 d . . . 
H51 H 0.7198 -0.0147 0.3508 0.026 Uiso 1 1 calc R . . 
C52 C 0.7242(3) 0.11060(18) 0.24297(19) 0.0186(8) Uani 1 1 d . . . 
H52 H 0.6516 0.1434 0.2199 0.022 Uiso 1 1 calc R . . 
C53 C 0.9169(4) 0.0129(2) 0.3875(3) 0.0340(10) Uani 1 1 d . . . 
H53A H 0.9413 0.0184 0.3320 0.051 Uiso 1 1 calc R . . 
H53B H 0.9450 -0.0342 0.4077 0.051 Uiso 1 1 calc R . . 
H53C H 0.9627 0.0494 0.4218 0.051 Uiso 1 1 calc R . . 
C54 C 0.7208(4) 0.0046(2) 0.4727(2) 0.0318(10) Uani 1 1 d . . . 
H54A H 0.6219 0.0024 0.4702 0.048 Uiso 1 1 calc R . . 
H54B H 0.7535 0.0422 0.5101 0.048 Uiso 1 1 calc R . . 
H54C H 0.7591 -0.0409 0.4915 0.048 Uiso 1 1 calc R . . 
C55 C 0.8584(4) 0.1441(2) 0.2238(2) 0.0270(9) Uani 1 1 d . . . 
H55A H 0.8609 0.1478 0.1652 0.041 Uiso 1 1 calc R . . 
H55B H 0.9337 0.1144 0.2461 0.041 Uiso 1 1 calc R . . 
H55C H 0.8666 0.1915 0.2479 0.041 Uiso 1 1 calc R . . 
C56 C 0.7011(4) 0.0402(2) 0.1979(2) 0.0325(10) Uani 1 1 d . . . 
H56A H 0.7063 0.0480 0.1400 0.049 Uiso 1 1 calc R . . 
H56B H 0.6116 0.0215 0.2071 0.049 Uiso 1 1 calc R . . 
H56C H 0.7707 0.0061 0.2177 0.049 Uiso 1 1 calc R . . 
C41 C 0.7914(4) 0.37089(17) 0.5403(2) 0.0206(8) Uani 1 1 d . . . 
H41 H 0.6936 0.3786 0.5225 0.025 Uiso 1 1 calc R . . 
C35 C 0.4002(4) 0.39470(19) 0.4615(2) 0.0265(9) Uani 1 1 d . . . 
H35 H 0.3385 0.4202 0.4912 0.032 Uiso 1 1 calc R . . 
 
loop_ 
 _atom_site_aniso_label 
 _atom_site_aniso_U_11 
 _atom_site_aniso_U_22 
 _atom_site_aniso_U_33 
 _atom_site_aniso_U_23 
 _atom_site_aniso_U_13 
 _atom_site_aniso_U_12 
Ir 0.01297(7) 0.01568(7) 0.01167(7) -0.00053(6) 0.00119(5) -0.00172(6) 
P2 0.0143(4) 0.0152(4) 0.0126(4) -0.0004(4) 0.0003(4) 0.0010(4) 
P1 0.0155(5) 0.0157(5) 0.0144(4) -0.0019(3) 0.0005(4) -0.0024(4) 
N 0.0126(14) 0.0135(15) 0.0124(14) -0.0001(11) 0.0011(12) -0.0006(12) 
C11 0.0150(18) 0.0153(18) 0.0112(17) 0.0034(14) -0.0018(15) -0.0013(14) 
C12 0.0110(16) 0.0194(18) 0.0100(16) 0.0023(14) -0.0018(14) -0.0006(14) 
C13 0.0215(19) 0.0179(19) 0.0157(18) -0.0035(14) 0.0000(16) 0.0001(15) 
C14 0.0205(19) 0.025(2) 0.0112(17) 0.0041(15) -0.0002(15) -0.0026(16) 
C15 0.0128(17) 0.0230(19) 0.0175(18) 0.0050(15) 0.0006(15) -0.0017(15) 
C16 0.0180(18) 0.0178(18) 0.0127(17) 0.0006(14) 0.0017(15) 0.0000(15) 
C17 0.022(2) 0.031(2) 0.026(2) -0.0066(17) 0.0004(17) -0.0060(17) 
C21 0.0176(17) 0.0140(16) 0.0130(16) -0.0008(15) 0.0015(14) 0.0047(15) 
C22 0.0159(18) 0.0145(17) 0.0159(18) 0.0003(14) 0.0047(15) 0.0047(14) 
C23 0.0211(19) 0.0202(18) 0.0119(17) -0.0052(14) 0.0017(16) -0.0027(15) 
C24 0.0200(19) 0.023(2) 0.0161(18) 0.0042(15) 0.0059(16) 0.0057(15) 
C3 0.023(2) 0.0180(19) 0.0185(18) 0.0008(14) 0.0024(16) -0.0016(15) 
C25 0.022(2) 0.0179(19) 0.0209(19) 0.0023(15) 0.0077(16) -0.0021(15) 
C26 0.0186(19) 0.0188(19) 0.0162(19) 0.0001(15) 0.0002(16) -0.0014(15) 
C27 0.034(2) 0.034(2) 0.0122(18) 0.0025(16) 0.0043(17) -0.0010(18) 
C32 0.0203(19) 0.0211(19) 0.0122(17) -0.0009(14) -0.0061(15) -0.0020(15) 
C31 0.0134(17) 0.0161(18) 0.0175(17) 0.0018(15) -0.0076(15) -0.0017(15) 
C33 0.030(2) 0.019(2) 0.024(2) 0.0058(16) -0.0067(17) -0.0009(17) 
C34 0.032(2) 0.018(2) 0.033(2) 0.0039(17) -0.0088(19) 0.0046(18) 
C36 0.0187(19) 0.0196(18) 0.0203(19) -0.0004(15) -0.0021(16) 0.0005(15) 
C42 0.0156(18) 0.024(2) 0.0172(19) -0.0056(15) -0.0034(16) -0.0027(15) 
C43 0.039(2) 0.020(2) 0.033(2) 0.0043(17) 0.001(2) -0.0068(18) 
C44 0.040(2) 0.023(2) 0.027(2) -0.0083(17) -0.0040(19) 0.0003(18) 
C45 0.0164(19) 0.045(3) 0.031(2) -0.0040(19) 0.0006(18) -0.0001(18) 
C46 0.029(2) 0.027(2) 0.034(2) -0.0042(18) -0.0155(19) 0.0078(18) 
C51 0.0182(19) 0.0160(18) 0.029(2) 0.0035(16) -0.0052(17) 0.0013(15) 
C52 0.0161(18) 0.027(2) 0.0124(17) -0.0004(15) -0.0006(15) 0.0055(16) 
C53 0.026(2) 0.026(2) 0.050(3) 0.0074(19) 0.000(2) 0.0065(18) 
C54 0.034(2) 0.025(2) 0.034(2) 0.0130(18) -0.005(2) -0.0062(18) 
C55 0.024(2) 0.041(2) 0.0169(19) 0.0009(17) 0.0053(17) 0.0037(18) 
C56 0.042(3) 0.034(2) 0.022(2) -0.0107(18) 0.0054(19) 0.0042(19) 
C41 0.022(2) 0.0163(19) 0.0226(19) -0.0003(15) -0.0025(17) -0.0007(15) 
C35 0.025(2) 0.026(2) 0.029(2) -0.0047(17) 0.0002(18) 0.0066(17) 
 
_geom_special_details 
; 
 All esds (except the esd in the dihedral angle between two l.s. planes) 
 are estimated using the full covariance matrix.  The cell esds are taken 
 into account individually in the estimation of esds in distances, angles 
 and torsion angles; correlations between esds in cell parameters are only 
 used when they are defined by crystal symmetry.  An approximate (isotropic) 
 treatment of cell esds is used for estimating esds involving l.s. planes. 
; 
 
loop_ 
 _geom_bond_atom_site_label_1 
 _geom_bond_atom_site_label_2 
 _geom_bond_distance 
 _geom_bond_site_symmetry_2 
 _geom_bond_publ_flag 
Ir C3 2.188(3) . ? 
Ir P2 2.2260(9) . ? 
Ir P1 2.2640(9) . ? 
Ir N 2.266(3) . ? 
Ir H2 1.58(3) . ? 
Ir H1 1.25(3) . ? 
P2 C12 1.834(3) . ? 
P2 C51 1.845(3) . ? 
P2 C52 1.865(3) . ? 
P1 C22 1.846(3) . ? 
P1 C42 1.854(3) . ? 
P1 C41 1.868(3) . ? 
N C31 1.486(4) . ? 
N C11 1.488(4) . ? 
N C21 1.490(4) . ? 
C11 C16 1.392(5) . ? 
C11 C12 1.393(4) . ? 
C12 C13 1.401(4) . ? 
C13 C14 1.374(5) . ? 
C13 H13 0.9500 . ? 
C14 C15 1.400(5) . ? 
C14 C17 1.502(5) . ? 
C15 C16 1.378(5) . ? 
C15 H15 0.9500 . ? 
C16 H16 0.9500 . ? 
C17 H17A 0.9800 . ? 
C17 H17B 0.9800 . ? 
C17 H17C 0.9800 . ? 
C21 C26 1.381(5) . ? 
C21 C22 1.414(5) . ? 
C22 C23 1.392(4) . ? 
C23 C24 1.398(5) . ? 
C23 H23 0.9500 . ? 
C24 C25 1.376(5) . ? 
C24 C27 1.518(5) . ? 
C3 C32 1.495(5) . ? 
C3 H3A 0.9900 . ? 
C3 H3B 0.9900 . ? 
C25 C26 1.392(5) . ? 
C25 H25 0.9500 . ? 
C26 H26 0.9500 . ? 
C27 H27A 0.9800 . ? 
C27 H27B 0.9800 . ? 
C27 H27C 0.9800 . ? 
C32 C31 1.395(5) . ? 
C32 C33 1.396(5) . ? 
C31 C36 1.399(5) . ? 
C33 C34 1.388(5) . ? 
C33 H33 0.9500 . ? 
C34 C35 1.376(5) . ? 
C34 H34 0.9500 . ? 
C36 C35 1.383(5) . ? 
C36 H36 0.9500 . ? 
C42 C46 1.523(5) . ? 
C42 C45 1.525(5) . ? 
C42 H42 1.0000 . ? 
C43 C41 1.528(5) . ? 
C43 H43A 0.9800 . ? 
C43 H43B 0.9800 . ? 
C43 H43C 0.9800 . ? 
C44 C41 1.523(5) . ? 
C44 H44A 0.9800 . ? 
C44 H44B 0.9800 . ? 
C44 H44C 0.9800 . ? 
C45 H45A 0.9800 . ? 
C45 H45B 0.9800 . ? 
C45 H45C 0.9800 . ? 
C46 H46A 0.9800 . ? 
C46 H46B 0.9800 . ? 
C46 H46C 0.9800 . ? 
C51 C54 1.519(5) . ? 
C51 C53 1.524(5) . ? 
C51 H51 1.0000 . ? 
C52 C56 1.532(5) . ? 
C52 C55 1.532(5) . ? 
C52 H52 1.0000 . ? 
C53 H53A 0.9800 . ? 
C53 H53B 0.9800 . ? 
C53 H53C 0.9800 . ? 
C54 H54A 0.9800 . ? 
C54 H54B 0.9800 . ? 
C54 H54C 0.9800 . ? 
C55 H55A 0.9800 . ? 
C55 H55B 0.9800 . ? 
C55 H55C 0.9800 . ? 
C56 H56A 0.9800 . ? 
C56 H56B 0.9800 . ? 
C56 H56C 0.9800 . ? 
C41 H41 1.0000 . ? 
C35 H35 0.9500 . ? 
 
loop_ 
 _geom_angle_atom_site_label_1 
 _geom_angle_atom_site_label_2 
 _geom_angle_atom_site_label_3 
 _geom_angle 
 _geom_angle_site_symmetry_1 
 _geom_angle_site_symmetry_3 
 _geom_angle_publ_flag 
C3 Ir P2 93.69(9) . . ? 
C3 Ir P1 102.66(9) . . ? 
P2 Ir P1 157.25(3) . . ? 
C3 Ir N 77.52(11) . . ? 
P2 Ir N 86.33(7) . . ? 
P1 Ir N 81.95(7) . . ? 
C3 Ir H2 177.1(12) . . ? 
P2 Ir H2 84.1(12) . . ? 
P1 Ir H2 79.0(12) . . ? 
N Ir H2 100.4(12) . . ? 
C3 Ir H1 96.7(14) . . ? 
P2 Ir H1 100.3(14) . . ? 
P1 Ir H1 93.5(14) . . ? 
N Ir H1 171.6(14) . . ? 
H2 Ir H1 85.6(19) . . ? 
C12 P2 C51 102.51(15) . . ? 
C12 P2 C52 104.89(15) . . ? 
C51 P2 C52 106.13(16) . . ? 
C12 P2 Ir 101.71(11) . . ? 
C51 P2 Ir 119.55(12) . . ? 
C52 P2 Ir 119.48(12) . . ? 
C22 P1 C42 104.67(15) . . ? 
C22 P1 C41 104.22(15) . . ? 
C42 P1 C41 104.98(16) . . ? 
C22 P1 Ir 96.96(11) . . ? 
C42 P1 Ir 118.48(11) . . ? 
C41 P1 Ir 124.33(11) . . ? 
C31 N C11 110.0(2) . . ? 
C31 N C21 110.4(2) . . ? 
C11 N C21 114.8(2) . . ? 
C31 N Ir 105.35(18) . . ? 
C11 N Ir 111.14(18) . . ? 
C21 N Ir 104.53(18) . . ? 
C16 C11 C12 118.9(3) . . ? 
C16 C11 N 120.7(3) . . ? 
C12 C11 N 120.3(3) . . ? 
C11 C12 C13 118.4(3) . . ? 
C11 C12 P2 119.6(2) . . ? 
C13 C12 P2 121.9(2) . . ? 
C14 C13 C12 123.0(3) . . ? 
C14 C13 H13 118.5 . . ? 
C12 C13 H13 118.5 . . ? 
C13 C14 C15 117.1(3) . . ? 
C13 C14 C17 120.4(3) . . ? 
C15 C14 C17 122.5(3) . . ? 
C16 C15 C14 121.1(3) . . ? 
C16 C15 H15 119.5 . . ? 
C14 C15 H15 119.5 . . ? 
C15 C16 C11 120.9(3) . . ? 
C15 C16 H16 119.5 . . ? 
C11 C16 H16 119.5 . . ? 
C14 C17 H17A 109.5 . . ? 
C14 C17 H17B 109.5 . . ? 
H17A C17 H17B 109.5 . . ? 
C14 C17 H17C 109.5 . . ? 
H17A C17 H17C 109.5 . . ? 
H17B C17 H17C 109.5 . . ? 
C26 C21 C22 119.8(3) . . ? 
C26 C21 N 123.2(3) . . ? 
C22 C21 N 117.0(3) . . ? 
C23 C22 C21 117.9(3) . . ? 
C23 C22 P1 124.0(3) . . ? 
C21 C22 P1 117.2(2) . . ? 
C22 C23 C24 122.7(3) . . ? 
C22 C23 H23 118.6 . . ? 
C24 C23 H23 118.6 . . ? 
C25 C24 C23 117.5(3) . . ? 
C25 C24 C27 121.8(3) . . ? 
C23 C24 C27 120.7(3) . . ? 
C32 C3 Ir 106.9(2) . . ? 
C32 C3 H3A 110.3 . . ? 
Ir C3 H3A 110.3 . . ? 
C32 C3 H3B 110.3 . . ? 
Ir C3 H3B 110.3 . . ? 
H3A C3 H3B 108.6 . . ? 
C24 C25 C26 121.7(3) . . ? 
C24 C25 H25 119.2 . . ? 
C26 C25 H25 119.2 . . ? 
C21 C26 C25 120.3(3) . . ? 
C21 C26 H26 119.8 . . ? 
C25 C26 H26 119.8 . . ? 
C24 C27 H27A 109.5 . . ? 
C24 C27 H27B 109.5 . . ? 
H27A C27 H27B 109.5 . . ? 
C24 C27 H27C 109.5 . . ? 
H27A C27 H27C 109.5 . . ? 
H27B C27 H27C 109.5 . . ? 
C31 C32 C33 116.5(3) . . ? 
C31 C32 C3 118.9(3) . . ? 
C33 C32 C3 124.4(3) . . ? 
C32 C31 C36 122.1(3) . . ? 
C32 C31 N 116.8(3) . . ? 
C36 C31 N 121.0(3) . . ? 
C34 C33 C32 121.9(3) . . ? 
C34 C33 H33 119.1 . . ? 
C32 C33 H33 119.1 . . ? 
C35 C34 C33 120.3(3) . . ? 
C35 C34 H34 119.8 . . ? 
C33 C34 H34 119.8 . . ? 
C35 C36 C31 119.4(3) . . ? 
C35 C36 H36 120.3 . . ? 
C31 C36 H36 120.3 . . ? 
C46 C42 C45 109.0(3) . . ? 
C46 C42 P1 113.4(2) . . ? 
C45 C42 P1 109.8(2) . . ? 
C46 C42 H42 108.2 . . ? 
C45 C42 H42 108.1 . . ? 
P1 C42 H42 108.2 . . ? 
C41 C43 H43A 109.5 . . ? 
C41 C43 H43B 109.5 . . ? 
H43A C43 H43B 109.5 . . ? 
C41 C43 H43C 109.5 . . ? 
H43A C43 H43C 109.5 . . ? 
H43B C43 H43C 109.5 . . ? 
C41 C44 H44A 109.5 . . ? 
C41 C44 H44B 109.5 . . ? 
H44A C44 H44B 109.5 . . ? 
C41 C44 H44C 109.5 . . ? 
H44A C44 H44C 109.5 . . ? 
H44B C44 H44C 109.5 . . ? 
C42 C45 H45A 109.5 . . ? 
C42 C45 H45B 109.5 . . ? 
H45A C45 H45B 109.5 . . ? 
C42 C45 H45C 109.5 . . ? 
H45A C45 H45C 109.5 . . ? 
H45B C45 H45C 109.5 . . ? 
C42 C46 H46A 109.5 . . ? 
C42 C46 H46B 109.5 . . ? 
H46A C46 H46B 109.5 . . ? 
C42 C46 H46C 109.5 . . ? 
H46A C46 H46C 109.5 . . ? 
H46B C46 H46C 109.5 . . ? 
C54 C51 C53 111.0(3) . . ? 
C54 C51 P2 112.0(3) . . ? 
C53 C51 P2 109.7(2) . . ? 
C54 C51 H51 108.0 . . ? 
C53 C51 H51 108.0 . . ? 
P2 C51 H51 108.0 . . ? 
C56 C52 C55 110.5(3) . . ? 
C56 C52 P2 117.4(2) . . ? 
C55 C52 P2 110.1(2) . . ? 
C56 C52 H52 106.0 . . ? 
C55 C52 H52 106.0 . . ? 
P2 C52 H52 106.0 . . ? 
C51 C53 H53A 109.5 . . ? 
C51 C53 H53B 109.5 . . ? 
H53A C53 H53B 109.5 . . ? 
C51 C53 H53C 109.5 . . ? 
H53A C53 H53C 109.5 . . ? 
H53B C53 H53C 109.5 . . ? 
C51 C54 H54A 109.5 . . ? 
C51 C54 H54B 109.5 . . ? 
H54A C54 H54B 109.5 . . ? 
C51 C54 H54C 109.5 . . ? 
H54A C54 H54C 109.5 . . ? 
H54B C54 H54C 109.5 . . ? 
C52 C55 H55A 109.5 . . ? 
C52 C55 H55B 109.5 . . ? 
H55A C55 H55B 109.5 . . ? 
C52 C55 H55C 109.5 . . ? 
H55A C55 H55C 109.5 . . ? 
H55B C55 H55C 109.5 . . ? 
C52 C56 H56A 109.5 . . ? 
C52 C56 H56B 109.5 . . ? 
H56A C56 H56B 109.5 . . ? 
C52 C56 H56C 109.5 . . ? 
H56A C56 H56C 109.5 . . ? 
H56B C56 H56C 109.5 . . ? 
C44 C41 C43 112.1(3) . . ? 
C44 C41 P1 115.1(2) . . ? 
C43 C41 P1 112.1(2) . . ? 
C44 C41 H41 105.5 . . ? 
C43 C41 H41 105.5 . . ? 
P1 C41 H41 105.5 . . ? 
C34 C35 C36 119.7(3) . . ? 
C34 C35 H35 120.1 . . ? 
C36 C35 H35 120.1 . . ? 
 
_diffrn_measured_fraction_theta_max    1.000 
_diffrn_reflns_theta_full              25.00 
_diffrn_measured_fraction_theta_full   1.000 
_refine_diff_density_max    1.256 
_refine_diff_density_min   -1.462 
_refine_diff_density_rms    0.093 
_iucr_refine_instructions_details
;
TITL SV487 in P2(1)/n
CELL 0.71073   9.92070  18.85430  16.64400  90.0000  94.9652  90.0000
ZERR    4.00   0.00080   0.00150   0.00140   0.0000   0.0017   0.0000
LATT  1
SYMM 0.5-X, 0.5+Y, 0.5-Z
SFAC C H N P IR
UNIT 132 192 4 8 4
LIST 6 ! automatically inserted. Change 6 to 4 for CHECKCIF!!
TEMP -153.160
Omit 0 50
Acta 50
 
L.S. 4
BOND $H
FMAP 2
PLAN 20
Size 0.091 0.087 0.080
 
WGHT      0.0204      1.8517 
FVAR       0.07870
MOLE   1
IR    5    0.779693    0.204398    0.426995    11.00000    0.01297    0.01568 =
         0.01167   -0.00053    0.00119   -0.00172
P2    4    0.711436    0.110006    0.354114    11.00000    0.01433    0.01523 =
         0.01257   -0.00042    0.00030    0.00101
H2    2    0.834660    0.147381    0.491384    11.00000    0.03178
P1    4    0.816746    0.272757    0.538555    11.00000    0.01552    0.01568 =
         0.01439   -0.00187    0.00053   -0.00235
H1    2    0.899593    0.208860    0.409698    11.00000   -1.20000
N     3    0.562273    0.214005    0.457664    11.00000    0.01255    0.01354 =
         0.01244   -0.00010    0.00106   -0.00062
C11   1    0.473304    0.162940    0.410040    11.00000    0.01499    0.01527 =
         0.01122    0.00340   -0.00181   -0.00135
C12   1    0.529337    0.109448    0.365788    11.00000    0.01097    0.01936 =
         0.00995    0.00228   -0.00184   -0.00064
C13   1    0.442882    0.058087    0.328715    11.00000    0.02146    0.01786 =
         0.01569   -0.00347   -0.00001    0.00008
AFIX  43
H13   2    0.481657    0.019761    0.301683    11.00000   -1.20000
AFIX   0
C14   1    0.304601    0.060573    0.329638    11.00000    0.02049    0.02493 =
         0.01124    0.00409   -0.00019   -0.00261
C15   1    0.250407    0.118946    0.367636    11.00000    0.01283    0.02302 =
         0.01748    0.00503    0.00061   -0.00173
AFIX  43
H15   2    0.155002    0.124445    0.365795    11.00000   -1.20000
AFIX   0
C16   1    0.333154    0.168554    0.407660    11.00000    0.01799    0.01783 =
         0.01268    0.00058    0.00174    0.00004
AFIX  43
H16   2    0.293975    0.207148    0.434014    11.00000   -1.20000
AFIX   0
C17   1    0.217837    0.002313    0.291427    11.00000    0.02202    0.03063 =
         0.02626   -0.00660    0.00044   -0.00598
AFIX 137
H17A  2    0.139898    0.023055    0.259607    11.00000   -1.50000
H17B  2    0.186061   -0.028152    0.333603    11.00000   -1.50000
H17C  2    0.270957   -0.025966    0.256145    11.00000   -1.50000
AFIX   0
C21   1    0.569194    0.203764    0.546717    11.00000    0.01763    0.01398 =
         0.01301   -0.00075    0.00148    0.00473
C22   1    0.677324    0.237108    0.593172    11.00000    0.01592    0.01448 =
         0.01589    0.00025    0.00470    0.00466
C23   1    0.682291    0.230924    0.676713    11.00000    0.02112    0.02022 =
         0.01194   -0.00524    0.00165   -0.00266
AFIX  43
H23   2    0.752536    0.254619    0.708576    11.00000   -1.20000
AFIX   0
C24   1    0.588244    0.191305    0.715687    11.00000    0.02005    0.02267 =
         0.01613    0.00418    0.00589    0.00566
C3    1    0.694429    0.279921    0.336608    11.00000    0.02345    0.01798 =
         0.01847    0.00084    0.00239   -0.00155
AFIX  23
H3A   2    0.765322    0.312911    0.321051    11.00000   -1.20000
H3B   2    0.656292    0.254535    0.287756    11.00000   -1.20000
AFIX   0
C25   1    0.485814    0.158775    0.668258    11.00000    0.02179    0.01788 =
         0.02085    0.00227    0.00765   -0.00215
AFIX  43
H25   2    0.420759    0.131383    0.693233    11.00000   -1.20000
AFIX   0
C26   1    0.475077    0.164981    0.584597    11.00000    0.01857    0.01880 =
         0.01624    0.00006    0.00024   -0.00145
AFIX  43
H26   2    0.402618    0.142413    0.553418    11.00000   -1.20000
AFIX   0
C27   1    0.601976    0.183397    0.806787    11.00000    0.03423    0.03426 =
         0.01221    0.00255    0.00430   -0.00101
AFIX 137
H27A  2    0.570219    0.136283    0.821362    11.00000   -1.50000
H27B  2    0.547464    0.219798    0.830784    11.00000   -1.50000
H27C  2    0.697110    0.189003    0.827030    11.00000   -1.50000
AFIX   0
C32   1    0.585667    0.319822    0.374093    11.00000    0.02032    0.02108 =
         0.01224   -0.00088   -0.00606   -0.00202
C31   1    0.521587    0.287910    0.436151    11.00000    0.01341    0.01611 =
         0.01748    0.00178   -0.00763   -0.00171
C33   1    0.551046    0.390255    0.356523    11.00000    0.03034    0.01931 =
         0.02433    0.00584   -0.00671   -0.00094
AFIX  43
H33   2    0.589941    0.413358    0.313368    11.00000   -1.20000
AFIX   0
C34   1    0.461401    0.427482    0.400324    11.00000    0.03224    0.01828 =
         0.03254    0.00392   -0.00878    0.00456
AFIX  43
H34   2    0.442231    0.475837    0.388030    11.00000   -1.20000
AFIX   0
C36   1    0.428735    0.324415    0.479474    11.00000    0.01866    0.01957 =
         0.02028   -0.00045   -0.00211    0.00048
AFIX  43
H36   2    0.385673    0.301109    0.520921    11.00000   -1.20000
AFIX   0
C42   1    0.971313    0.256623    0.606899    11.00000    0.01555    0.02375 =
         0.01716   -0.00562   -0.00337   -0.00275
AFIX  13
H42   2    0.963823    0.284568    0.657385    11.00000   -1.20000
AFIX   0
C43   1    0.869610    0.408817    0.477740    11.00000    0.03870    0.02048 =
         0.03332    0.00432    0.00098   -0.00675
AFIX 137
H43A  2    0.855032    0.384188    0.425865    11.00000   -1.50000
H43B  2    0.966345    0.408730    0.495662    11.00000   -1.50000
H43C  2    0.837594    0.457851    0.471599    11.00000   -1.50000
AFIX   0
C44   1    0.813761    0.405159    0.623231    11.00000    0.04003    0.02314 =
         0.02743   -0.00827   -0.00402    0.00027
AFIX 137
H44A  2    0.786869    0.455146    0.619523    11.00000   -1.50000
H44B  2    0.909655    0.401844    0.642679    11.00000   -1.50000
H44C  2    0.759138    0.380532    0.660867    11.00000   -1.50000
AFIX   0
C45   1    1.095371    0.282806    0.567570    11.00000    0.01636    0.04513 =
         0.03065   -0.00398    0.00055   -0.00007
AFIX 137
H45A  2    1.098286    0.260325    0.514661    11.00000   -1.50000
H45B  2    1.177347    0.270509    0.601853    11.00000   -1.50000
H45C  2    1.090189    0.334406    0.560927    11.00000   -1.50000
AFIX   0
C46   1    0.991529    0.178958    0.630069    11.00000    0.02864    0.02735 =
         0.03396   -0.00420   -0.01554    0.00777
AFIX 137
H46A  2    1.012155    0.151630    0.582569    11.00000   -1.50000
H46B  2    0.908708    0.160502    0.650517    11.00000   -1.50000
H46C  2    1.066730    0.174771    0.672031    11.00000   -1.50000
AFIX   0
C51   1    0.764257    0.020610    0.389220    11.00000    0.01819    0.01601 =
         0.02900    0.00351   -0.00516    0.00131
AFIX  13
H51   2    0.719759   -0.014744    0.350762    11.00000   -1.20000
AFIX   0
C52   1    0.724159    0.110599    0.242969    11.00000    0.01614    0.02691 =
         0.01239   -0.00037   -0.00062    0.00551
AFIX  13
H52   2    0.651556    0.143377    0.219929    11.00000   -1.20000
AFIX   0
C53   1    0.916937    0.012881    0.387517    11.00000    0.02609    0.02558 =
         0.04995    0.00744    0.00042    0.00654
AFIX 137
H53A  2    0.941254    0.018436    0.332038    11.00000   -1.50000
H53B  2    0.944986   -0.034163    0.407661    11.00000   -1.50000
H53C  2    0.962726    0.049399    0.421758    11.00000   -1.50000
AFIX   0
C54   1    0.720845    0.004645    0.472654    11.00000    0.03450    0.02530 =
         0.03425    0.01295   -0.00484   -0.00620
AFIX 137
H54A  2    0.621889    0.002356    0.470230    11.00000   -1.50000
H54B  2    0.753546    0.042228    0.510080    11.00000   -1.50000
H54C  2    0.759097   -0.040945    0.491471    11.00000   -1.50000
AFIX   0
C55   1    0.858420    0.144095    0.223823    11.00000    0.02396    0.04081 =
         0.01687    0.00090    0.00533    0.00371
AFIX 137
H55A  2    0.860868    0.147824    0.165239    11.00000   -1.50000
H55B  2    0.933675    0.114389    0.246074    11.00000   -1.50000
H55C  2    0.866583    0.191497    0.247910    11.00000   -1.50000
AFIX   0
C56   1    0.701119    0.040200    0.197909    11.00000    0.04153    0.03399 =
         0.02238   -0.01069    0.00537    0.00418
AFIX 137
H56A  2    0.706301    0.047971    0.140039    11.00000   -1.50000
H56B  2    0.611577    0.021525    0.207150    11.00000   -1.50000
H56C  2    0.770741    0.006069    0.217712    11.00000   -1.50000
AFIX   0
C41   1    0.791413    0.370893    0.540268    11.00000    0.02196    0.01629 =
         0.02264   -0.00027   -0.00251   -0.00068
AFIX  13
H41   2    0.693618    0.378589    0.522519    11.00000   -1.20000
AFIX   0
C35   1    0.400176    0.394696    0.461455    11.00000    0.02460    0.02589 =
         0.02865   -0.00471    0.00018    0.00659
AFIX  43
H35   2    0.338544    0.420244    0.491152    11.00000   -1.20000
MOLE   2
REM #####
HKLF 4
 
REM  SV487 in P2(1)/n
REM R1 =  0.0224 for   4660 Fo > 4sig(Fo)  and  0.0310 for all   5462 data
REM    351 parameters refined using      0 restraints
 
END  
     
WGHT      0.0204      1.8517 
REM Highest difference peak  1.256,  deepest hole -1.462,  1-sigma level  0.093
Q1    1   0.7571  0.2532  0.4203  11.00000  0.05    1.26
Q2    1   0.8231  0.2288  0.3754  11.00000  0.05    0.65
Q3    1   0.7353  0.1446  0.3991  11.00000  0.05    0.62
Q4    1   0.7763  0.1466  0.4247  11.00000  0.05    0.55
Q5    1   0.7502  0.1996  0.4782  11.00000  0.05    0.45
Q6    1   0.9094  0.1904  0.4335  11.00000  0.05    0.42
Q7    1   0.6731  0.2074  0.4158  11.00000  0.05    0.41
Q8    1   0.2626  0.0363  0.3133  11.00000  0.05    0.40
Q9    1   0.7373  0.0578  0.3710  11.00000  0.05    0.39
Q10   1   0.7844  0.3936  0.4856  11.00000  0.05    0.36
Q11   1   0.5187  0.1920  0.6998  11.00000  0.05    0.36
Q12   1   0.9786  0.2763  0.6419  11.00000  0.05    0.35
Q13   1   0.6516  0.2003  0.5762  11.00000  0.05    0.35
Q14   1   0.8232  0.3258  0.5412  11.00000  0.05    0.35
Q15   1   0.6009  0.1565  0.6987  11.00000  0.05    0.34
Q16   1   0.6021  0.1871  0.7587  11.00000  0.05    0.34
Q17   1   0.6520  0.3030  0.3640  11.00000  0.05    0.33
Q18   1   0.5038  0.1054  0.3246  11.00000  0.05    0.33
Q19   1   0.7121  0.3223  0.2991  11.00000  0.05    0.33
Q20   1   0.2866  0.0930  0.3349  11.00000  0.05    0.32

;


 
data_sv26 
 
_audit_creation_method            SHELXL-97 
_chemical_name_systematic 
; 
 ? 
; 
_chemical_name_common             ? 
_chemical_melting_point           ? 
_chemical_formula_moiety          ? 
_chemical_formula_sum 
 'C41 H60 Ir N P2' 
_chemical_formula_weight          821.04 
 
loop_ 
 _atom_type_symbol 
 _atom_type_description 
 _atom_type_scat_dispersion_real 
 _atom_type_scat_dispersion_imag 
 _atom_type_scat_source 
 'C'  'C'   0.0033   0.0016 
 'International Tables Vol C Tables 4.2.6.8 and 6.1.1.4' 
 'H'  'H'   0.0000   0.0000 
 'International Tables Vol C Tables 4.2.6.8 and 6.1.1.4' 
 'N'  'N'   0.0061   0.0033 
 'International Tables Vol C Tables 4.2.6.8 and 6.1.1.4' 
 'P'  'P'   0.1023   0.0942 
 'International Tables Vol C Tables 4.2.6.8 and 6.1.1.4' 
 'Ir'  'Ir'  -1.4442   7.9887 
 'International Tables Vol C Tables 4.2.6.8 and 6.1.1.4' 
 
_symmetry_cell_setting            'triclinic' 
_symmetry_space_group_name_H-M    'P -1' 
 
loop_ 
 _symmetry_equiv_pos_as_xyz 
 'x, y, z' 
 '-x, -y, -z' 
 
_cell_length_a                    10.4541(3) 
_cell_length_b                    11.9272(4) 
_cell_length_c                    17.0690(5) 
_cell_angle_alpha                 101.6180(10) 
_cell_angle_beta                  99.5930(10) 
_cell_angle_gamma                 103.6130(10) 
_cell_volume                      1974.25(10) 
_cell_formula_units_Z             2 
_cell_measurement_temperature     120(2) 
_cell_measurement_reflns_used     8864 
_cell_measurement_theta_min       4.668 
_cell_measurement_theta_max       51.839 
 
_exptl_crystal_description        'block' 
_exptl_crystal_colour             'yellow' 
_exptl_crystal_size_max           0.18 
_exptl_crystal_size_mid           0.15 
_exptl_crystal_size_min           0.11 
_exptl_crystal_density_meas       ? 
_exptl_crystal_density_diffrn     1.381 
_exptl_crystal_density_method     'not measured' 
_exptl_crystal_F_000              840 
_exptl_absorpt_coefficient_mu     3.490 
_exptl_absorpt_correction_type    'multi-scan' 
_exptl_absorpt_correction_T_min   0.6478 
_exptl_absorpt_correction_T_max   0.7454 
_exptl_absorpt_process_details    'Bruker AXS area detector scaling and absorption correction' 
 
_exptl_special_details 
; 
 ? 
; 
 
_diffrn_ambient_temperature       120(2) 
_diffrn_radiation_wavelength      0.71073 
_diffrn_radiation_type            MoK\a 
_diffrn_radiation_source          'fine-focus sealed tube' 
_diffrn_radiation_monochromator   graphite 
_diffrn_measurement_device_type   'Bruker APEX-II' 
_diffrn_measurement_method        ? 
_diffrn_detector_area_resol_mean  ? 
_diffrn_standards_number          ? 
_diffrn_standards_interval_count  ? 
_diffrn_standards_interval_time   ? 
_diffrn_standards_decay_%         ? 
_diffrn_reflns_number             27664 
_diffrn_reflns_av_R_equivalents   0.0388 
_diffrn_reflns_av_sigmaI/netI     0.0441 
_diffrn_reflns_limit_h_min        -13 
_diffrn_reflns_limit_h_max        13 
_diffrn_reflns_limit_k_min        -14 
_diffrn_reflns_limit_k_max        14 
_diffrn_reflns_limit_l_min        -21 
_diffrn_reflns_limit_l_max        21 
_diffrn_reflns_theta_min          1.25 
_diffrn_reflns_theta_max          26.53 
_reflns_number_total              8193 
_reflns_number_gt                 7225 
_reflns_threshold_expression      >2sigma(I) 
 
_computing_data_collection        ? 
_computing_cell_refinement        ? 
_computing_data_reduction         ? 
_computing_structure_solution     'SHELXS-97 (Sheldrick, 1990)' 
_computing_structure_refinement   'SHELXL-97 (Sheldrick, 1997)' 
_computing_molecular_graphics     ? 
_computing_publication_material   ? 
 
_refine_special_details 
; 
 Refinement of F^2^ against ALL reflections.  The weighted R-factor wR and 
 goodness of fit S are based on F^2^, conventional R-factors R are based 
 on F, with F set to zero for negative F^2^. The threshold expression of 
 F^2^ > 2sigma(F^2^) is used only for calculating R-factors(gt) etc. and is 
 not relevant to the choice of reflections for refinement.  R-factors based 
 on F^2^ are statistically about twice as large as those based on F, and R- 
 factors based on ALL data will be even larger. 
; 
 
_refine_ls_structure_factor_coef  Fsqd  
_refine_ls_matrix_type            full 
_refine_ls_weighting_scheme       calc  
_refine_ls_weighting_details 
 'calc w=1/[\s^2^(Fo^2^)+(0.0373P)^2^+0.0000P] where P=(Fo^2^+2Fc^2^)/3' 
_atom_sites_solution_primary      direct 
_atom_sites_solution_secondary    difmap 
_atom_sites_solution_hydrogens    geom 
_refine_ls_hydrogen_treatment     mixed 
_refine_ls_extinction_method      none 
_refine_ls_extinction_coef        ? 
_refine_ls_number_reflns          8193 
_refine_ls_number_parameters      421 
_refine_ls_number_restraints      0 
_refine_ls_R_factor_all           0.0363 
_refine_ls_R_factor_gt            0.0293 
_refine_ls_wR_factor_ref          0.0700 
_refine_ls_wR_factor_gt           0.0681 
_refine_ls_goodness_of_fit_ref    1.079 
_refine_ls_restrained_S_all       1.079 
_refine_ls_shift/su_max           0.003 
_refine_ls_shift/su_mean          0.000 
 
loop_ 
 _atom_site_label 
 _atom_site_type_symbol 
 _atom_site_fract_x 
 _atom_site_fract_y 
 _atom_site_fract_z 
 _atom_site_U_iso_or_equiv 
 _atom_site_adp_type 
 _atom_site_occupancy 
 _atom_site_symmetry_multiplicity 
 _atom_site_calc_flag 
 _atom_site_refinement_flags 
 _atom_site_disorder_assembly 
 _atom_site_disorder_group 
Ir Ir 0.778068(14) 0.903892(13) 0.668084(9) 0.01266(5) Uani 1 1 d . . . 
P2 P 0.73592(9) 0.75288(8) 0.73680(6) 0.0133(2) Uani 1 1 d . . . 
P1 P 0.70360(9) 1.04788(8) 0.74863(6) 0.0135(2) Uani 1 1 d . . . 
C43 C 0.9062(4) 1.1032(5) 0.8997(3) 0.0372(12) Uani 1 1 d . . . 
H43A H 0.9475 1.0635 0.8588 0.056 Uiso 1 1 calc R . . 
H43B H 0.9185 1.0725 0.9487 0.056 Uiso 1 1 calc R . . 
H43C H 0.9492 1.1892 0.9146 0.056 Uiso 1 1 calc R . . 
C46 C 0.7131(5) 1.2195(4) 0.6526(3) 0.0291(10) Uani 1 1 d . . . 
H46A H 0.7580 1.1822 0.6128 0.044 Uiso 1 1 calc R . . 
H46B H 0.7320 1.3048 0.6552 0.044 Uiso 1 1 calc R . . 
H46C H 0.6155 1.1822 0.6354 0.044 Uiso 1 1 calc R . . 
C51 C 0.8901(4) 0.7190(4) 0.7874(2) 0.0191(8) Uani 1 1 d . . . 
H51 H 0.8615 0.6634 0.8220 0.023 Uiso 1 1 calc R . . 
C52 C 0.9995(4) 0.8282(4) 0.8433(3) 0.0254(9) Uani 1 1 d . . . 
H52A H 1.0358 0.8807 0.8101 0.038 Uiso 1 1 calc R . . 
H52B H 1.0723 0.8023 0.8719 0.038 Uiso 1 1 calc R . . 
H52C H 0.9602 0.8715 0.8837 0.038 Uiso 1 1 calc R . . 
C53 C 0.9546(4) 0.6566(4) 0.7246(3) 0.0294(10) Uani 1 1 d . . . 
H53A H 0.8964 0.5756 0.6987 0.044 Uiso 1 1 calc R . . 
H53B H 1.0431 0.6529 0.7520 0.044 Uiso 1 1 calc R . . 
H53C H 0.9657 0.7011 0.6826 0.044 Uiso 1 1 calc R . . 
C54 C 0.6230(4) 0.5993(3) 0.6845(2) 0.0194(8) Uani 1 1 d . . . 
H54 H 0.5314 0.6101 0.6673 0.023 Uiso 1 1 calc R . . 
C55 C 0.6063(4) 0.5158(4) 0.7410(3) 0.0276(10) Uani 1 1 d . . . 
H55A H 0.5368 0.4414 0.7118 0.041 Uiso 1 1 calc R . . 
H55B H 0.5791 0.5538 0.7896 0.041 Uiso 1 1 calc R . . 
H55C H 0.6922 0.4983 0.7581 0.041 Uiso 1 1 calc R . . 
C56 C 0.6549(4) 0.5368(4) 0.6054(3) 0.0257(9) Uani 1 1 d . . . 
H56A H 0.5708 0.4858 0.5676 0.039 Uiso 1 1 calc R . . 
H56B H 0.7149 0.4880 0.6185 0.039 Uiso 1 1 calc R . . 
H56C H 0.6994 0.5967 0.5795 0.039 Uiso 1 1 calc R . . 
C61 C 0.6189(4) 0.8995(4) 0.5611(2) 0.0191(8) Uani 1 1 d . . . 
H61 H 0.5322 0.9085 0.5753 0.023 Uiso 1 1 calc R . . 
C62 C 0.6336(4) 0.7847(4) 0.5526(2) 0.0183(8) Uani 1 1 d . . . 
H62 H 0.5560 0.7249 0.5613 0.022 Uiso 1 1 calc R . . 
C63 C 0.7031(4) 0.7361(4) 0.4873(2) 0.0229(9) Uani 1 1 d . . . 
H63A H 0.6870 0.7724 0.4405 0.027 Uiso 1 1 calc R . . 
H63B H 0.6620 0.6490 0.4667 0.027 Uiso 1 1 calc R . . 
C64 C 0.8564(4) 0.7607(4) 0.5189(2) 0.0228(9) Uani 1 1 d . . . 
H64A H 0.8750 0.6889 0.5333 0.027 Uiso 1 1 calc R . . 
H64B H 0.9025 0.7765 0.4744 0.027 Uiso 1 1 calc R . . 
C65 C 0.9132(4) 0.8647(4) 0.5925(2) 0.0173(8) Uani 1 1 d . . . 
H65 H 1.0034 0.8663 0.6243 0.021 Uiso 1 1 calc R . . 
C66 C 0.8980(4) 0.9815(4) 0.5916(2) 0.0177(8) Uani 1 1 d . . . 
H66 H 0.9794 1.0482 0.6227 0.021 Uiso 1 1 calc R . . 
C67 C 0.8231(4) 1.0046(4) 0.5144(3) 0.0236(9) Uani 1 1 d . . . 
H67A H 0.8425 0.9564 0.4657 0.028 Uiso 1 1 calc R . . 
H67B H 0.8584 1.0896 0.5152 0.028 Uiso 1 1 calc R . . 
C68 C 0.6694(4) 0.9754(4) 0.5052(2) 0.0217(9) Uani 1 1 d . . . 
H68A H 0.6438 1.0507 0.5175 0.026 Uiso 1 1 calc R . . 
H68B H 0.6245 0.9327 0.4475 0.026 Uiso 1 1 calc R . . 
C45 C 0.9204(4) 1.2442(4) 0.7554(3) 0.0381(12) Uani 1 1 d . . . 
H45A H 0.9540 1.1840 0.7235 0.057 Uiso 1 1 calc R . . 
H45B H 0.9563 1.2552 0.8141 0.057 Uiso 1 1 calc R . . 
H45C H 0.9498 1.3198 0.7405 0.057 Uiso 1 1 calc R . . 
C44 C 0.7659(4) 1.2028(3) 0.7367(3) 0.0203(9) Uani 1 1 d . . . 
H44 H 0.7355 1.2571 0.7778 0.024 Uiso 1 1 calc R . . 
C11 C 0.3470(4) 0.7002(3) 0.7005(2) 0.0165(8) Uani 1 1 d . . . 
C12 C 0.2718(4) 0.6668(4) 0.6198(3) 0.0209(9) Uani 1 1 d . . . 
C13 C 0.1740(4) 0.5554(4) 0.5923(3) 0.0268(10) Uani 1 1 d . . . 
H13 H 0.1222 0.5319 0.5375 0.032 Uiso 1 1 calc R . . 
C14 C 0.1510(4) 0.4791(4) 0.6431(3) 0.0278(10) Uani 1 1 d . . . 
H14 H 0.0837 0.4047 0.6233 0.033 Uiso 1 1 calc R . . 
C15 C 0.2260(4) 0.5117(4) 0.7219(3) 0.0247(9) Uani 1 1 d . . . 
H15 H 0.2123 0.4592 0.7567 0.030 Uiso 1 1 calc R . . 
C16 C 0.3217(4) 0.6209(3) 0.7509(3) 0.0212(9) Uani 1 1 d . . . 
H16 H 0.3717 0.6432 0.8062 0.025 Uiso 1 1 calc R . . 
C21 C 0.4199(3) 0.9205(3) 0.7295(2) 0.0129(7) Uani 1 1 d . . . 
C22 C 0.5173(4) 1.0290(3) 0.7378(2) 0.0141(8) Uani 1 1 d . . . 
C23 C 0.4704(4) 1.1296(3) 0.7406(2) 0.0172(8) Uani 1 1 d . . . 
H23 H 0.5347 1.2038 0.7471 0.021 Uiso 1 1 calc R . . 
C24 C 0.3357(4) 1.1288(3) 0.7345(2) 0.0155(8) Uani 1 1 d . . . 
C25 C 0.2434(4) 1.0212(3) 0.7262(2) 0.0158(8) Uani 1 1 d . . . 
H25 H 0.1506 1.0172 0.7221 0.019 Uiso 1 1 calc R . . 
C26 C 0.2846(4) 0.9193(3) 0.7239(2) 0.0156(8) Uani 1 1 d . . . 
H26 H 0.2192 0.8460 0.7183 0.019 Uiso 1 1 calc R . . 
C1 C 0.2849(4) 0.7422(4) 0.5606(3) 0.0262(9) Uani 1 1 d . . . 
H1A H 0.2568 0.6913 0.5045 0.039 Uiso 1 1 calc R . . 
H1B H 0.3791 0.7894 0.5706 0.039 Uiso 1 1 calc R . . 
H1C H 0.2273 0.7959 0.5675 0.039 Uiso 1 1 calc R . . 
C27 C 0.2931(4) 1.2412(3) 0.7391(3) 0.0219(9) Uani 1 1 d . . . 
H27A H 0.2396 1.2382 0.6854 0.033 Uiso 1 1 calc R . . 
H27B H 0.3735 1.3098 0.7545 0.033 Uiso 1 1 calc R . . 
H27C H 0.2386 1.2490 0.7803 0.033 Uiso 1 1 calc R . . 
H H 0.911(5) 0.961(5) 0.742(3) 0.064(17) Uiso 1 1 d . . . 
C37 C 0.7343(4) 0.8313(5) 1.0567(3) 0.0341(11) Uani 1 1 d . . . 
H37A H 0.7921 0.7774 1.0537 0.051 Uiso 1 1 calc R . . 
H37B H 0.6666 0.8061 1.0878 0.051 Uiso 1 1 calc R . . 
H37C H 0.7897 0.9127 1.0843 0.051 Uiso 1 1 calc R . . 
C36 C 0.4848(4) 0.8603(3) 0.8811(2) 0.0179(8) Uani 1 1 d . . . 
H36 H 0.4048 0.8852 0.8732 0.021 Uiso 1 1 calc R . . 
C35 C 0.5492(4) 0.8656(4) 0.9590(2) 0.0202(8) Uani 1 1 d . . . 
H35 H 0.5147 0.8955 1.0045 0.024 Uiso 1 1 calc R . . 
C34 C 0.6645(4) 0.8276(4) 0.9717(2) 0.0212(9) Uani 1 1 d . . . 
C33 C 0.7130(4) 0.7873(3) 0.9040(2) 0.0176(8) Uani 1 1 d . . . 
H33 H 0.7914 0.7601 0.9124 0.021 Uiso 1 1 calc R . . 
C32 C 0.6527(4) 0.7844(3) 0.8239(2) 0.0143(8) Uani 1 1 d . . . 
C31 C 0.5333(3) 0.8197(3) 0.8136(2) 0.0129(7) Uani 1 1 d . . . 
C41 C 0.7562(4) 1.0788(4) 0.8639(2) 0.0191(8) Uani 1 1 d . . . 
H41 H 0.7122 1.0031 0.8773 0.023 Uiso 1 1 calc R . . 
C42 C 0.7038(4) 1.1738(4) 0.9119(3) 0.0303(10) Uani 1 1 d . . . 
H42A H 0.7491 1.2521 0.9053 0.045 Uiso 1 1 calc R . . 
H42B H 0.7226 1.1743 0.9702 0.045 Uiso 1 1 calc R . . 
H42C H 0.6062 1.1562 0.8911 0.045 Uiso 1 1 calc R . . 
N N 0.4547(3) 0.8111(3) 0.73300(18) 0.0133(6) Uani 1 1 d . . . 

 
loop_ 
 _atom_site_aniso_label 
 _atom_site_aniso_U_11 
 _atom_site_aniso_U_22 
 _atom_site_aniso_U_33 
 _atom_site_aniso_U_23 
 _atom_site_aniso_U_13 
 _atom_site_aniso_U_12 
Ir 0.01043(8) 0.01320(8) 0.01486(8) 0.00375(5) 0.00372(5) 0.00344(5) 
P2 0.0111(5) 0.0135(5) 0.0171(5) 0.0047(4) 0.0041(4) 0.0055(4) 
P1 0.0103(5) 0.0119(5) 0.0185(5) 0.0042(4) 0.0048(4) 0.0023(4) 
C43 0.027(2) 0.049(3) 0.025(2) -0.012(2) -0.0064(19) 0.017(2) 
C46 0.041(3) 0.020(2) 0.036(3) 0.015(2) 0.018(2) 0.013(2) 
C51 0.0136(19) 0.022(2) 0.026(2) 0.0114(17) 0.0048(16) 0.0097(16) 
C52 0.018(2) 0.033(3) 0.027(2) 0.0120(19) 0.0026(17) 0.0094(19) 
C53 0.021(2) 0.031(3) 0.040(3) 0.008(2) 0.008(2) 0.0147(19) 
C54 0.0142(19) 0.015(2) 0.029(2) 0.0030(17) 0.0065(17) 0.0038(16) 
C55 0.029(2) 0.017(2) 0.041(3) 0.0101(19) 0.017(2) 0.0048(18) 
C56 0.027(2) 0.019(2) 0.028(2) 0.0008(18) 0.0075(19) 0.0048(18) 
C61 0.0081(18) 0.028(2) 0.0162(19) 0.0041(17) -0.0017(15) 0.0009(16) 
C62 0.0121(19) 0.021(2) 0.0161(19) 0.0016(16) -0.0007(15) 0.0002(16) 
C63 0.024(2) 0.024(2) 0.018(2) 0.0023(17) 0.0044(17) 0.0035(18) 
C64 0.021(2) 0.025(2) 0.023(2) 0.0017(18) 0.0109(17) 0.0061(18) 
C65 0.0083(18) 0.026(2) 0.0171(19) 0.0043(17) 0.0045(15) 0.0040(16) 
C66 0.0121(19) 0.022(2) 0.020(2) 0.0086(17) 0.0076(16) 0.0021(16) 
C67 0.021(2) 0.029(2) 0.027(2) 0.0154(19) 0.0124(18) 0.0086(18) 
C68 0.020(2) 0.029(2) 0.018(2) 0.0109(18) 0.0023(16) 0.0084(18) 
C45 0.027(3) 0.019(2) 0.068(4) 0.011(2) 0.018(2) 0.000(2) 
C44 0.018(2) 0.0124(19) 0.033(2) 0.0061(17) 0.0128(18) 0.0032(16) 
C11 0.0100(18) 0.0128(19) 0.026(2) 0.0028(16) 0.0040(16) 0.0045(15) 
C12 0.015(2) 0.020(2) 0.028(2) 0.0036(18) 0.0055(17) 0.0073(17) 
C13 0.019(2) 0.025(2) 0.033(2) 0.0002(19) 0.0115(19) 0.0045(18) 
C14 0.021(2) 0.016(2) 0.039(3) -0.0035(19) 0.0086(19) 0.0000(17) 
C15 0.025(2) 0.015(2) 0.042(3) 0.0129(19) 0.014(2) 0.0098(18) 
C16 0.0121(19) 0.017(2) 0.035(2) 0.0060(18) 0.0051(17) 0.0061(16) 
C21 0.0117(18) 0.0143(19) 0.0150(18) 0.0048(15) 0.0038(14) 0.0064(15) 
C22 0.0135(19) 0.0162(19) 0.0138(18) 0.0038(15) 0.0041(15) 0.0056(15) 
C23 0.016(2) 0.0143(19) 0.023(2) 0.0070(16) 0.0065(16) 0.0029(16) 
C24 0.017(2) 0.017(2) 0.0155(18) 0.0046(15) 0.0052(15) 0.0082(16) 
C25 0.0100(18) 0.022(2) 0.0173(19) 0.0065(16) 0.0029(15) 0.0066(16) 
C26 0.0129(19) 0.0148(19) 0.0177(19) 0.0032(15) 0.0030(15) 0.0020(15) 
C1 0.021(2) 0.027(2) 0.025(2) 0.0033(19) 0.0032(18) -0.0003(18) 
C27 0.018(2) 0.018(2) 0.036(2) 0.0117(18) 0.0113(18) 0.0080(17) 
C37 0.028(2) 0.055(3) 0.021(2) 0.012(2) 0.0052(19) 0.014(2) 
C36 0.0106(19) 0.019(2) 0.028(2) 0.0099(17) 0.0070(16) 0.0061(16) 
C35 0.019(2) 0.021(2) 0.023(2) 0.0071(17) 0.0110(17) 0.0043(17) 
C34 0.018(2) 0.026(2) 0.018(2) 0.0090(17) 0.0045(16) 0.0018(17) 
C33 0.0128(19) 0.022(2) 0.021(2) 0.0113(17) 0.0048(16) 0.0055(16) 
C32 0.0128(19) 0.0122(18) 0.0182(19) 0.0059(15) 0.0043(15) 0.0019(15) 
C31 0.0102(18) 0.0105(18) 0.0174(18) 0.0039(15) 0.0030(14) 0.0017(14) 
C41 0.019(2) 0.018(2) 0.020(2) 0.0061(17) 0.0052(16) 0.0018(16) 
C42 0.029(2) 0.041(3) 0.020(2) 0.000(2) 0.0071(18) 0.012(2) 
N 0.0079(15) 0.0132(16) 0.0189(16) 0.0064(13) 0.0016(12) 0.0022(12) 
 
_geom_special_details 
; 
 All esds (except the esd in the dihedral angle between two l.s. planes) 
 are estimated using the full covariance matrix.  The cell esds are taken 
 into account individually in the estimation of esds in distances, angles 
 and torsion angles; correlations between esds in cell parameters are only 
 used when they are defined by crystal symmetry.  An approximate (isotropic) 
 treatment of cell esds is used for estimating esds involving l.s. planes. 
; 
 
loop_ 
 _geom_bond_atom_site_label_1 
 _geom_bond_atom_site_label_2 
 _geom_bond_distance 
 _geom_bond_site_symmetry_2 
 _geom_bond_publ_flag 
Ir C65 2.134(4) . ? 
Ir C66 2.150(4) . ? 
Ir C61 2.240(4) . ? 
Ir C62 2.249(4) . ? 
Ir P2 2.3374(9) . ? 
Ir P1 2.3410(10) . ? 
Ir H 1.61(5) . ? 
P2 C32 1.863(4) . ? 
P2 C51 1.868(4) . ? 
P2 C54 1.875(4) . ? 
P1 C44 1.874(4) . ? 
P1 C22 1.880(4) . ? 
P1 C41 1.888(4) . ? 
C43 C41 1.520(5) . ? 
C43 H43A 0.9800 . ? 
C43 H43B 0.9800 . ? 
C43 H43C 0.9800 . ? 
C46 C44 1.519(6) . ? 
C46 H46A 0.9800 . ? 
C46 H46B 0.9800 . ? 
C46 H46C 0.9800 . ? 
C51 C53 1.522(6) . ? 
C51 C52 1.532(6) . ? 
C51 H51 1.0000 . ? 
C52 H52A 0.9800 . ? 
C52 H52B 0.9800 . ? 
C52 H52C 0.9800 . ? 
C53 H53A 0.9800 . ? 
C53 H53B 0.9800 . ? 
C53 H53C 0.9800 . ? 
C54 C55 1.522(6) . ? 
C54 C56 1.534(5) . ? 
C54 H54 1.0000 . ? 
C55 H55A 0.9800 . ? 
C55 H55B 0.9800 . ? 
C55 H55C 0.9800 . ? 
C56 H56A 0.9800 . ? 
C56 H56B 0.9800 . ? 
C56 H56C 0.9800 . ? 
C61 C62 1.396(6) . ? 
C61 C68 1.517(5) . ? 
C61 H61 1.0000 . ? 
C62 C63 1.521(5) . ? 
C62 H62 1.0000 . ? 
C63 C64 1.540(5) . ? 
C63 H63A 0.9900 . ? 
C63 H63B 0.9900 . ? 
C64 C65 1.499(5) . ? 
C64 H64A 0.9900 . ? 
C64 H64B 0.9900 . ? 
C65 C66 1.442(5) . ? 
C65 H65 1.0000 . ? 
C66 C67 1.526(5) . ? 
C66 H66 1.0000 . ? 
C67 C68 1.535(5) . ? 
C67 H67A 0.9900 . ? 
C67 H67B 0.9900 . ? 
C68 H68A 0.9900 . ? 
C68 H68B 0.9900 . ? 
C45 C44 1.532(6) . ? 
C45 H45A 0.9800 . ? 
C45 H45B 0.9800 . ? 
C45 H45C 0.9800 . ? 
C44 H44 1.0000 . ? 
C11 C12 1.395(5) . ? 
C11 C16 1.411(5) . ? 
C11 N 1.456(5) . ? 
C12 C13 1.407(6) . ? 
C12 C1 1.485(6) . ? 
C13 C14 1.386(6) . ? 
C13 H13 0.9500 . ? 
C14 C15 1.368(6) . ? 
C14 H14 0.9500 . ? 
C15 C16 1.379(5) . ? 
C15 H15 0.9500 . ? 
C16 H16 0.9500 . ? 
C21 C26 1.397(5) . ? 
C21 C22 1.411(5) . ? 
C21 N 1.444(4) . ? 
C22 C23 1.395(5) . ? 
C23 C24 1.392(5) . ? 
C23 H23 0.9500 . ? 
C24 C25 1.377(5) . ? 
C24 C27 1.500(5) . ? 
C25 C26 1.378(5) . ? 
C25 H25 0.9500 . ? 
C26 H26 0.9500 . ? 
C1 H1A 0.9800 . ? 
C1 H1B 0.9800 . ? 
C1 H1C 0.9800 . ? 
C27 H27A 0.9800 . ? 
C27 H27B 0.9800 . ? 
C27 H27C 0.9800 . ? 
C37 C34 1.499(5) . ? 
C37 H37A 0.9800 . ? 
C37 H37B 0.9800 . ? 
C37 H37C 0.9800 . ? 
C36 C35 1.369(5) . ? 
C36 C31 1.380(5) . ? 
C36 H36 0.9500 . ? 
C35 C34 1.384(5) . ? 
C35 H35 0.9500 . ? 
C34 C33 1.381(5) . ? 
C33 C32 1.397(5) . ? 
C33 H33 0.9500 . ? 
C32 C31 1.403(5) . ? 
C31 N 1.451(4) . ? 
C41 C42 1.525(6) . ? 
C41 H41 1.0000 . ? 
C42 H42A 0.9800 . ? 
C42 H42B 0.9800 . ? 
C42 H42C 0.9800 . ? 
 
loop_ 
 _geom_angle_atom_site_label_1 
 _geom_angle_atom_site_label_2 
 _geom_angle_atom_site_label_3 
 _geom_angle 
 _geom_angle_site_symmetry_1 
 _geom_angle_site_symmetry_3 
 _geom_angle_publ_flag 
C65 Ir C66 39.34(14) . . ? 
C65 Ir C61 93.00(14) . . ? 
C66 Ir C61 78.32(14) . . ? 
C65 Ir C62 78.38(14) . . ? 
C66 Ir C62 87.73(15) . . ? 
C61 Ir C62 36.24(14) . . ? 
C65 Ir P2 107.15(11) . . ? 
C66 Ir P2 145.83(10) . . ? 
C61 Ir P2 118.34(10) . . ? 
C62 Ir P2 91.12(10) . . ? 
C65 Ir P1 148.26(11) . . ? 
C66 Ir P1 110.73(11) . . ? 
C61 Ir P1 88.37(11) . . ? 
C62 Ir P1 117.88(10) . . ? 
P2 Ir P1 99.93(3) . . ? 
C65 Ir H 85.9(19) . . ? 
C66 Ir H 86.5(19) . . ? 
C61 Ir H 156.9(19) . . ? 
C62 Ir H 161.3(19) . . ? 
P2 Ir H 83.8(19) . . ? 
P1 Ir H 80.8(19) . . ? 
C32 P2 C51 101.81(17) . . ? 
C32 P2 C54 97.92(17) . . ? 
C51 P2 C54 101.46(18) . . ? 
C32 P2 Ir 115.15(12) . . ? 
C51 P2 Ir 114.77(13) . . ? 
C54 P2 Ir 122.49(13) . . ? 
C44 P1 C22 102.31(17) . . ? 
C44 P1 C41 99.29(18) . . ? 
C22 P1 C41 99.11(16) . . ? 
C44 P1 Ir 114.88(13) . . ? 
C22 P1 Ir 119.52(12) . . ? 
C41 P1 Ir 118.41(13) . . ? 
C41 C43 H43A 109.5 . . ? 
C41 C43 H43B 109.5 . . ? 
H43A C43 H43B 109.5 . . ? 
C41 C43 H43C 109.5 . . ? 
H43A C43 H43C 109.5 . . ? 
H43B C43 H43C 109.5 . . ? 
C44 C46 H46A 109.5 . . ? 
C44 C46 H46B 109.5 . . ? 
H46A C46 H46B 109.5 . . ? 
C44 C46 H46C 109.5 . . ? 
H46A C46 H46C 109.5 . . ? 
H46B C46 H46C 109.5 . . ? 
C53 C51 C52 107.7(3) . . ? 
C53 C51 P2 111.5(3) . . ? 
C52 C51 P2 114.5(3) . . ? 
C53 C51 H51 107.7 . . ? 
C52 C51 H51 107.7 . . ? 
P2 C51 H51 107.7 . . ? 
C51 C52 H52A 109.5 . . ? 
C51 C52 H52B 109.5 . . ? 
H52A C52 H52B 109.5 . . ? 
C51 C52 H52C 109.5 . . ? 
H52A C52 H52C 109.5 . . ? 
H52B C52 H52C 109.5 . . ? 
C51 C53 H53A 109.5 . . ? 
C51 C53 H53B 109.5 . . ? 
H53A C53 H53B 109.5 . . ? 
C51 C53 H53C 109.5 . . ? 
H53A C53 H53C 109.5 . . ? 
H53B C53 H53C 109.5 . . ? 
C55 C54 C56 109.8(3) . . ? 
C55 C54 P2 113.9(3) . . ? 
C56 C54 P2 116.1(3) . . ? 
C55 C54 H54 105.3 . . ? 
C56 C54 H54 105.3 . . ? 
P2 C54 H54 105.3 . . ? 
C54 C55 H55A 109.5 . . ? 
C54 C55 H55B 109.5 . . ? 
H55A C55 H55B 109.5 . . ? 
C54 C55 H55C 109.5 . . ? 
H55A C55 H55C 109.5 . . ? 
H55B C55 H55C 109.5 . . ? 
C54 C56 H56A 109.5 . . ? 
C54 C56 H56B 109.5 . . ? 
H56A C56 H56B 109.5 . . ? 
C54 C56 H56C 109.5 . . ? 
H56A C56 H56C 109.5 . . ? 
H56B C56 H56C 109.5 . . ? 
C62 C61 C68 120.7(4) . . ? 
C62 C61 Ir 72.2(2) . . ? 
C68 C61 Ir 114.3(2) . . ? 
C62 C61 H61 114.3 . . ? 
C68 C61 H61 114.3 . . ? 
Ir C61 H61 114.3 . . ? 
C61 C62 C63 119.5(4) . . ? 
C61 C62 Ir 71.5(2) . . ? 
C63 C62 Ir 113.6(2) . . ? 
C61 C62 H62 115.0 . . ? 
C63 C62 H62 115.0 . . ? 
Ir C62 H62 115.0 . . ? 
C62 C63 C64 113.2(3) . . ? 
C62 C63 H63A 108.9 . . ? 
C64 C63 H63A 108.9 . . ? 
C62 C63 H63B 108.9 . . ? 
C64 C63 H63B 108.9 . . ? 
H63A C63 H63B 107.8 . . ? 
C65 C64 C63 112.6(3) . . ? 
C65 C64 H64A 109.1 . . ? 
C63 C64 H64A 109.1 . . ? 
C65 C64 H64B 109.1 . . ? 
C63 C64 H64B 109.1 . . ? 
H64A C64 H64B 107.8 . . ? 
C66 C65 C64 122.2(3) . . ? 
C66 C65 Ir 70.9(2) . . ? 
C64 C65 Ir 116.7(2) . . ? 
C66 C65 H65 113.5 . . ? 
C64 C65 H65 113.5 . . ? 
Ir C65 H65 113.5 . . ? 
C65 C66 C67 120.9(4) . . ? 
C65 C66 Ir 69.8(2) . . ? 
C67 C66 Ir 117.3(2) . . ? 
C65 C66 H66 113.9 . . ? 
C67 C66 H66 113.9 . . ? 
Ir C66 H66 113.9 . . ? 
C66 C67 C68 114.0(3) . . ? 
C66 C67 H67A 108.8 . . ? 
C68 C67 H67A 108.8 . . ? 
C66 C67 H67B 108.8 . . ? 
C68 C67 H67B 108.8 . . ? 
H67A C67 H67B 107.7 . . ? 
C61 C68 C67 113.0(3) . . ? 
C61 C68 H68A 109.0 . . ? 
C67 C68 H68A 109.0 . . ? 
C61 C68 H68B 109.0 . . ? 
C67 C68 H68B 109.0 . . ? 
H68A C68 H68B 107.8 . . ? 
C44 C45 H45A 109.5 . . ? 
C44 C45 H45B 109.5 . . ? 
H45A C45 H45B 109.5 . . ? 
C44 C45 H45C 109.5 . . ? 
H45A C45 H45C 109.5 . . ? 
H45B C45 H45C 109.5 . . ? 
C46 C44 C45 107.9(4) . . ? 
C46 C44 P1 114.7(3) . . ? 
C45 C44 P1 111.3(3) . . ? 
C46 C44 H44 107.5 . . ? 
C45 C44 H44 107.5 . . ? 
P1 C44 H44 107.5 . . ? 
C12 C11 C16 118.6(4) . . ? 
C12 C11 N 122.2(3) . . ? 
C16 C11 N 119.1(3) . . ? 
C11 C12 C13 118.4(4) . . ? 
C11 C12 C1 124.5(4) . . ? 
C13 C12 C1 117.0(4) . . ? 
C14 C13 C12 121.9(4) . . ? 
C14 C13 H13 119.1 . . ? 
C12 C13 H13 119.1 . . ? 
C15 C14 C13 119.5(4) . . ? 
C15 C14 H14 120.3 . . ? 
C13 C14 H14 120.3 . . ? 
C14 C15 C16 120.1(4) . . ? 
C14 C15 H15 120.0 . . ? 
C16 C15 H15 120.0 . . ? 
C15 C16 C11 121.6(4) . . ? 
C15 C16 H16 119.2 . . ? 
C11 C16 H16 119.2 . . ? 
C26 C21 C22 119.3(3) . . ? 
C26 C21 N 117.7(3) . . ? 
C22 C21 N 122.8(3) . . ? 
C23 C22 C21 116.5(3) . . ? 
C23 C22 P1 118.4(3) . . ? 
C21 C22 P1 125.0(3) . . ? 
C24 C23 C22 124.4(4) . . ? 
C24 C23 H23 117.8 . . ? 
C22 C23 H23 117.8 . . ? 
C25 C24 C23 117.4(3) . . ? 
C25 C24 C27 121.3(3) . . ? 
C23 C24 C27 121.4(3) . . ? 
C24 C25 C26 120.5(3) . . ? 
C24 C25 H25 119.7 . . ? 
C26 C25 H25 119.7 . . ? 
C25 C26 C21 121.9(3) . . ? 
C25 C26 H26 119.1 . . ? 
C21 C26 H26 119.1 . . ? 
C12 C1 H1A 109.5 . . ? 
C12 C1 H1B 109.5 . . ? 
H1A C1 H1B 109.5 . . ? 
C12 C1 H1C 109.5 . . ? 
H1A C1 H1C 109.5 . . ? 
H1B C1 H1C 109.5 . . ? 
C24 C27 H27A 109.5 . . ? 
C24 C27 H27B 109.5 . . ? 
H27A C27 H27B 109.5 . . ? 
C24 C27 H27C 109.5 . . ? 
H27A C27 H27C 109.5 . . ? 
H27B C27 H27C 109.5 . . ? 
C34 C37 H37A 109.5 . . ? 
C34 C37 H37B 109.5 . . ? 
H37A C37 H37B 109.5 . . ? 
C34 C37 H37C 109.5 . . ? 
H37A C37 H37C 109.5 . . ? 
H37B C37 H37C 109.5 . . ? 
C35 C36 C31 121.6(3) . . ? 
C35 C36 H36 119.2 . . ? 
C31 C36 H36 119.2 . . ? 
C36 C35 C34 120.2(4) . . ? 
C36 C35 H35 119.9 . . ? 
C34 C35 H35 119.9 . . ? 
C33 C34 C35 118.0(4) . . ? 
C33 C34 C37 121.5(4) . . ? 
C35 C34 C37 120.5(4) . . ? 
C34 C33 C32 123.4(4) . . ? 
C34 C33 H33 118.3 . . ? 
C32 C33 H33 118.3 . . ? 
C33 C32 C31 116.6(3) . . ? 
C33 C32 P2 122.0(3) . . ? 
C31 C32 P2 121.1(3) . . ? 
C36 C31 C32 120.1(3) . . ? 
C36 C31 N 117.8(3) . . ? 
C32 C31 N 122.1(3) . . ? 
C43 C41 C42 109.0(3) . . ? 
C43 C41 P1 116.2(3) . . ? 
C42 C41 P1 115.2(3) . . ? 
C43 C41 H41 105.1 . . ? 
C42 C41 H41 105.1 . . ? 
P1 C41 H41 105.1 . . ? 
C41 C42 H42A 109.5 . . ? 
C41 C42 H42B 109.5 . . ? 
H42A C42 H42B 109.5 . . ? 
C41 C42 H42C 109.5 . . ? 
H42A C42 H42C 109.5 . . ? 
H42B C42 H42C 109.5 . . ? 
C21 N C31 111.3(3) . . ? 
C21 N C11 117.3(3) . . ? 
C31 N C11 113.1(3) . . ? 
 
_diffrn_measured_fraction_theta_max    0.998 
_diffrn_reflns_theta_full              25.00 
_diffrn_measured_fraction_theta_full   1.000 
_refine_diff_density_max    3.437 
_refine_diff_density_min   -0.965 
_refine_diff_density_rms    0.132
_iucr_refine_instructions_details
;
TITL SV26 in P-1
CELL 0.71073  10.4541  11.9272  17.0690 101.618  99.593 103.613
ZERR    2.00   0.0003   0.0004   0.0005   0.001   0.001   0.001
LATT 1
SFAC C H N P IR
UNIT 82 120 2 4 2
LIST 6 ! automatically inserted. Change 6 to 4 for CHECKCIF!!
TEMP -153.150
Bond $H
Acta 50
 
L.S. 4
BOND
FMAP 2
PLAN 20
 
WGHT    0.037300
FVAR       1.23916
IR    5    0.778068    0.903892    0.668084    11.00000    0.01043    0.01320 =
         0.01486    0.00375    0.00372    0.00344
P2    4    0.735923    0.752883    0.736803    11.00000    0.01115    0.01345 =
         0.01707    0.00469    0.00411    0.00547
P1    4    0.703603    1.047877    0.748630    11.00000    0.01028    0.01194 =
         0.01848    0.00423    0.00480    0.00226
C43   1    0.906184    1.103173    0.899676    11.00000    0.02715    0.04883 =
         0.02524   -0.01164   -0.00642    0.01716
AFIX 137
H43A  2    0.947506    1.063537    0.858810    11.00000   -1.50000
H43B  2    0.918532    1.072470    0.948691    11.00000   -1.50000
H43C  2    0.949223    1.189249    0.914563    11.00000   -1.50000
AFIX   0
C46   1    0.713148    1.219490    0.652558    11.00000    0.04086    0.01974 =
         0.03641    0.01506    0.01837    0.01348
AFIX 137
H46A  2    0.757977    1.182186    0.612812    11.00000   -1.50000
H46B  2    0.732005    1.304789    0.655155    11.00000   -1.50000
H46C  2    0.615458    1.182241    0.635436    11.00000   -1.50000
AFIX   0
C51   1    0.890086    0.719048    0.787436    11.00000    0.01357    0.02239 =
         0.02636    0.01142    0.00478    0.00969
AFIX  13
H51   2    0.861501    0.663447    0.821992    11.00000   -1.20000
AFIX   0
C52   1    0.999455    0.828232    0.843299    11.00000    0.01759    0.03343 =
         0.02742    0.01199    0.00262    0.00944
AFIX 137
H52A  2    1.035838    0.880713    0.810093    11.00000   -1.50000
H52B  2    1.072295    0.802340    0.871855    11.00000   -1.50000
H52C  2    0.960180    0.871472    0.883677    11.00000   -1.50000
AFIX   0
C53   1    0.954557    0.656576    0.724572    11.00000    0.02119    0.03118 =
         0.04013    0.00840    0.00822    0.01471
AFIX 137
H53A  2    0.896392    0.575581    0.698651    11.00000   -1.50000
H53B  2    1.043062    0.652865    0.751995    11.00000   -1.50000
H53C  2    0.965731    0.701055    0.682591    11.00000   -1.50000
AFIX   0
C54   1    0.623029    0.599342    0.684485    11.00000    0.01418    0.01470 =
         0.02875    0.00302    0.00645    0.00380
AFIX  13
H54   2    0.531381    0.610102    0.667267    11.00000   -1.20000
AFIX   0
C55   1    0.606301    0.515755    0.741025    11.00000    0.02906    0.01682 =
         0.04092    0.01013    0.01741    0.00478
AFIX 137
H55A  2    0.536789    0.441433    0.711821    11.00000   -1.50000
H55B  2    0.579141    0.553770    0.789567    11.00000   -1.50000
H55C  2    0.692203    0.498252    0.758084    11.00000   -1.50000
AFIX   0
C56   1    0.654934    0.536819    0.605352    11.00000    0.02680    0.01948 =
         0.02824    0.00077    0.00751    0.00480
AFIX 137
H56A  2    0.570844    0.485802    0.567550    11.00000   -1.50000
H56B  2    0.714941    0.487992    0.618458    11.00000   -1.50000
H56C  2    0.699400    0.596723    0.579495    11.00000   -1.50000
AFIX   0
C61   1    0.618862    0.899544    0.561085    11.00000    0.00811    0.02844 =
         0.01620    0.00411   -0.00172    0.00086
AFIX  13
H61   2    0.532178    0.908462    0.575329    11.00000   -1.20000
AFIX   0
C62   1    0.633619    0.784674    0.552558    11.00000    0.01215    0.02142 =
         0.01615    0.00164   -0.00071    0.00017
AFIX  13
H62   2    0.555956    0.724926    0.561290    11.00000   -1.20000
AFIX   0
C63   1    0.703056    0.736089    0.487257    11.00000    0.02423    0.02360 =
         0.01775    0.00226    0.00443    0.00353
AFIX  23
H63A  2    0.687042    0.772409    0.440548    11.00000   -1.20000
H63B  2    0.661982    0.648969    0.466711    11.00000   -1.20000
AFIX   0
C64   1    0.856385    0.760722    0.518879    11.00000    0.02062    0.02502 =
         0.02299    0.00170    0.01089    0.00610
AFIX  23
H64A  2    0.875014    0.688866    0.533262    11.00000   -1.20000
H64B  2    0.902518    0.776477    0.474435    11.00000   -1.20000
AFIX   0
C65   1    0.913220    0.864657    0.592492    11.00000    0.00833    0.02618 =
         0.01709    0.00431    0.00447    0.00400
AFIX  13
H65   2    1.003392    0.866317    0.624294    11.00000   -1.20000
AFIX   0
C66   1    0.898013    0.981480    0.591559    11.00000    0.01213    0.02223 =
         0.02026    0.00855    0.00758    0.00213
AFIX  13
H66   2    0.979412    1.048168    0.622744    11.00000   -1.20000
AFIX   0
C67   1    0.823103    1.004633    0.514364    11.00000    0.02149    0.02924 =
         0.02730    0.01542    0.01241    0.00858
AFIX  23
H67A  2    0.842501    0.956356    0.465740    11.00000   -1.20000
H67B  2    0.858413    1.089611    0.515194    11.00000   -1.20000
AFIX   0
C68   1    0.669425    0.975372    0.505153    11.00000    0.01987    0.02928 =
         0.01816    0.01094    0.00228    0.00842
AFIX  23
H68A  2    0.643775    1.050727    0.517498    11.00000   -1.20000
H68B  2    0.624517    0.932726    0.447480    11.00000   -1.20000
AFIX   0
C45   1    0.920418    1.244195    0.755389    11.00000    0.02681    0.01948 =
         0.06780    0.01140    0.01789    0.00038
AFIX 137
H45A  2    0.954045    1.183979    0.723528    11.00000   -1.50000
H45B  2    0.956340    1.255231    0.814087    11.00000   -1.50000
H45C  2    0.949772    1.319841    0.740525    11.00000   -1.50000
AFIX   0
C44   1    0.765853    1.202833    0.736676    11.00000    0.01783    0.01237 =
         0.03299    0.00609    0.01285    0.00317
AFIX  13
H44   2    0.735533    1.257127    0.777789    11.00000   -1.20000
AFIX   0
C11   1    0.346976    0.700183    0.700502    11.00000    0.01004    0.01278 =
         0.02630    0.00277    0.00398    0.00445
C12   1    0.271821    0.666762    0.619770    11.00000    0.01510    0.02029 =
         0.02766    0.00363    0.00552    0.00728
C13   1    0.173965    0.555428    0.592335    11.00000    0.01932    0.02549 =
         0.03347    0.00020    0.01154    0.00450
AFIX  43
H13   2    0.122165    0.531907    0.537474    11.00000   -1.20000
AFIX   0
C14   1    0.151002    0.479090    0.643093    11.00000    0.02085    0.01641 =
         0.03937   -0.00355    0.00858   -0.00003
AFIX  43
H14   2    0.083699    0.404707    0.623295    11.00000   -1.20000
AFIX   0
C15   1    0.226049    0.511747    0.721919    11.00000    0.02456    0.01499 =
         0.04173    0.01288    0.01355    0.00977
AFIX  43
H15   2    0.212273    0.459191    0.756719    11.00000   -1.20000
AFIX   0
C16   1    0.321674    0.620856    0.750935    11.00000    0.01209    0.01736 =
         0.03499    0.00600    0.00510    0.00615
AFIX  43
H16   2    0.371712    0.643168    0.806174    11.00000   -1.20000
AFIX   0
C21   1    0.419857    0.920475    0.729471    11.00000    0.01169    0.01426 =
         0.01502    0.00479    0.00378    0.00643
C22   1    0.517291    1.028978    0.737759    11.00000    0.01345    0.01622 =
         0.01377    0.00378    0.00405    0.00562
C23   1    0.470385    1.129646    0.740579    11.00000    0.01596    0.01428 =
         0.02268    0.00698    0.00651    0.00295
AFIX  43
H23   2    0.534733    1.203799    0.747096    11.00000   -1.20000
AFIX   0
C24   1    0.335686    1.128823    0.734490    11.00000    0.01716    0.01660 =
         0.01552    0.00465    0.00524    0.00823
C25   1    0.243426    1.021210    0.726237    11.00000    0.00996    0.02198 =
         0.01726    0.00647    0.00287    0.00659
AFIX  43
H25   2    0.150637    1.017241    0.722138    11.00000   -1.20000
AFIX   0
C26   1    0.284631    0.919251    0.723879    11.00000    0.01288    0.01477 =
         0.01769    0.00315    0.00301    0.00200
AFIX  43
H26   2    0.219246    0.846045    0.718292    11.00000   -1.20000
AFIX   0
C1    1    0.284867    0.742242    0.560564    11.00000    0.02082    0.02676 =
         0.02517    0.00327    0.00319   -0.00025
AFIX 137
H1A   2    0.256806    0.691317    0.504455    11.00000   -1.50000
H1B   2    0.379132    0.789351    0.570627    11.00000   -1.50000
H1C   2    0.227271    0.795874    0.567535    11.00000   -1.50000
AFIX   0
C27   1    0.293147    1.241193    0.739057    11.00000    0.01751    0.01830 =
         0.03560    0.01173    0.01125    0.00799
AFIX 137
H27A  2    0.239564    1.238201    0.685396    11.00000   -1.50000
H27B  2    0.373454    1.309837    0.754490    11.00000   -1.50000
H27C  2    0.238631    1.248954    0.780268    11.00000   -1.50000
AFIX   0
H     2    0.910501    0.960981    0.741529    11.00000    0.06404
C37   1    0.734268    0.831281    1.056729    11.00000    0.02794    0.05540 =
         0.02117    0.01175    0.00523    0.01401
AFIX 137
H37A  2    0.792107    0.777445    1.053702    11.00000   -1.50000
H37B  2    0.666646    0.806097    1.087800    11.00000   -1.50000
H37C  2    0.789650    0.912719    1.084283    11.00000   -1.50000
AFIX   0
C36   1    0.484827    0.860303    0.881053    11.00000    0.01059    0.01852 =
         0.02847    0.00993    0.00696    0.00610
AFIX  43
H36   2    0.404767    0.885223    0.873234    11.00000   -1.20000
AFIX   0
C35   1    0.549221    0.865602    0.959000    11.00000    0.01919    0.02107 =
         0.02264    0.00711    0.01100    0.00432
AFIX  43
H35   2    0.514657    0.895451    1.004474    11.00000   -1.20000
AFIX   0
C34   1    0.664539    0.827584    0.971713    11.00000    0.01839    0.02643 =
         0.01813    0.00903    0.00452    0.00176
C33   1    0.712992    0.787281    0.904030    11.00000    0.01284    0.02189 =
         0.02146    0.01128    0.00479    0.00551
AFIX  43
H33   2    0.791411    0.760086    0.912398    11.00000   -1.20000
AFIX   0
C32   1    0.652728    0.784414    0.823924    11.00000    0.01282    0.01223 =
         0.01822    0.00591    0.00428    0.00193
C31   1    0.533344    0.819657    0.813560    11.00000    0.01024    0.01052 =
         0.01736    0.00388    0.00299    0.00165
C41   1    0.756191    1.078764    0.863946    11.00000    0.01867    0.01790 =
         0.02001    0.00614    0.00515    0.00183
AFIX  13
H41   2    0.712191    1.003140    0.877326    11.00000   -1.20000
AFIX   0
C42   1    0.703820    1.173828    0.911946    11.00000    0.02877    0.04128 =
         0.01951    0.00021    0.00709    0.01234
AFIX 137
H42A  2    0.749061    1.252100    0.905330    11.00000   -1.50000
H42B  2    0.722554    1.174258    0.970223    11.00000   -1.50000
H42C  2    0.606180    1.156235    0.891141    11.00000   -1.50000
AFIX   0
N     3    0.454657    0.811083    0.733005    11.00000    0.00793    0.01323 =
         0.01889    0.00637    0.00165    0.00224
HKLF 4
 
REM  SV26 in P-1
REM R1 =  0.0293 for   7225 Fo > 4sig(Fo)  and  0.0363 for all   8193 data
REM    421 parameters refined using      0 restraints
 
END  
     
WGHT      0.0373      0.0000 
REM Highest difference peak  3.437,  deepest hole -0.965,  1-sigma level  0.132
Q1    1   0.6940  0.8641  0.6509  11.00000  0.05    3.44
Q2    1   0.7772  0.9026  0.7158  11.00000  0.05    1.92
Q3    1   0.8858  0.9687  0.6922  11.00000  0.05    0.61
Q4    1   0.7047  1.0588  0.7964  11.00000  0.05    0.55
Q5    1   0.9158  0.7773  0.8122  11.00000  0.05    0.55
Q6    1   0.6975  0.8786  1.0978  11.00000  0.05    0.55
Q7    1   0.7376  0.7601  0.7874  11.00000  0.05    0.52
Q8    1   0.7359  1.1266  0.7492  11.00000  0.05    0.51
Q9    1   0.6066  0.8184  0.8175  11.00000  0.05    0.51
Q10   1   0.5882  0.8158  0.9725  11.00000  0.05    0.50
Q11   1   0.8869  0.9098  0.6829  11.00000  0.05    0.50
Q12   1   0.6262  0.8746  0.9748  11.00000  0.05    0.49
Q13   1   0.6633  0.8220  0.8077  11.00000  0.05    0.48
Q14   1   0.8748  0.8791  0.6269  11.00000  0.05    0.47
Q15   1   0.3026  1.1655  0.7267  11.00000  0.05    0.47
Q16   1   0.7415  1.2580  0.9717  11.00000  0.05    0.47
Q17   1   0.6095  1.0361  0.7474  11.00000  0.05    0.47
Q18   1   0.3657  0.9328  0.7524  11.00000  0.05    0.47
Q19   1   0.6932  0.8573  0.9779  11.00000  0.05    0.46
Q20   1   0.3041  1.0789  0.7499  11.00000  0.05    0.45

; 
# SQUEEZE RESULTS (APPEND TO CIF)
# Note: Data are Listed for all Voids in the P1 Unit Cell
# i.e. Centre of Gravity, Solvent Accessible Volume,
# Recovered number of Electrons in the Void and
# Details about the Squeezed Material
loop_
  _platon_squeeze_void_nr                      
  _platon_squeeze_void_average_x               
  _platon_squeeze_void_average_y               
  _platon_squeeze_void_average_z               
  _platon_squeeze_void_volume                  
  _platon_squeeze_void_count_electrons         
  _platon_squeeze_void_content                 
   1 -0.001  0.500 -0.000       282        85 ' '
_platon_squeeze_details                      
;
a highly disordered molecule of n-hexane was removed
;


 
data_sv842 
 
_audit_creation_method            SHELXL-97 
_chemical_name_systematic 
; 
 ? 
; 
_chemical_name_common             ? 
_chemical_melting_point           ? 
_chemical_formula_moiety          ? 
_chemical_formula_sum 
 'C69 H69 B F24 Ir N O P2' 
_chemical_formula_weight          1649.20 
 
loop_ 
 _atom_type_symbol 
 _atom_type_description 
 _atom_type_scat_dispersion_real 
 _atom_type_scat_dispersion_imag 
 _atom_type_scat_source 
 'C'  'C'   0.0033   0.0016 
 'International Tables Vol C Tables 4.2.6.8 and 6.1.1.4' 
 'H'  'H'   0.0000   0.0000 
 'International Tables Vol C Tables 4.2.6.8 and 6.1.1.4' 
 'B'  'B'   0.0013   0.0007 
 'International Tables Vol C Tables 4.2.6.8 and 6.1.1.4' 
 'N'  'N'   0.0061   0.0033 
 'International Tables Vol C Tables 4.2.6.8 and 6.1.1.4' 
 'F'  'F'   0.0171   0.0103 
 'International Tables Vol C Tables 4.2.6.8 and 6.1.1.4' 
 'P'  'P'   0.1023   0.0942 
 'International Tables Vol C Tables 4.2.6.8 and 6.1.1.4' 
 'Ir'  'Ir'  -1.4442   7.9887 
 'International Tables Vol C Tables 4.2.6.8 and 6.1.1.4' 
 'O'  'O'   0.0106   0.0060 
 'International Tables Vol C Tables 4.2.6.8 and 6.1.1.4' 
 
_symmetry_cell_setting            'triclinic' 
_symmetry_space_group_name_H-M    'P-1' 
 
loop_ 
 _symmetry_equiv_pos_as_xyz 
 'x, y, z' 
 '-x, -y, -z' 
 
_cell_length_a                    13.2891(17) 
_cell_length_b                    14.6174(18) 
_cell_length_c                    19.173(2) 
_cell_angle_alpha                 103.635(4) 
_cell_angle_beta                  96.295(5) 
_cell_angle_gamma                 104.069(5) 
_cell_volume                      3455.4(7) 
_cell_formula_units_Z             2 
_cell_measurement_temperature     120(2) 
_cell_measurement_reflns_used     9975 
_cell_measurement_theta_min       2.22 
_cell_measurement_theta_max       22.38 
 
_exptl_crystal_description        'block' 
_exptl_crystal_colour             ? 
_exptl_crystal_size_max           0.12 
_exptl_crystal_size_mid           0.10 
_exptl_crystal_size_min           0.08 
_exptl_crystal_density_meas       ? 
_exptl_crystal_density_diffrn     1.585 
_exptl_crystal_density_method     'not measured' 
_exptl_crystal_F_000              1652 
_exptl_absorpt_coefficient_mu     2.087 
_exptl_absorpt_correction_type    'multi-scan' 
_exptl_absorpt_correction_T_min   0.6960 
_exptl_absorpt_correction_T_max   0.7454 
_exptl_absorpt_process_details    'Bruker AXS area detector scaling and absorption correction' 
 
_exptl_special_details 
; 
 ? 
; 
 
_diffrn_ambient_temperature       120(2) 
_diffrn_radiation_wavelength      0.71073 
_diffrn_radiation_type            MoK\a 
_diffrn_radiation_source          'fine-focus sealed tube' 
_diffrn_radiation_monochromator   graphite 
_diffrn_measurement_device_type   'Bruker APEX-II' 
_diffrn_measurement_method        ? 
_diffrn_detector_area_resol_mean  ? 
_diffrn_standards_number          ? 
_diffrn_standards_interval_count  ? 
_diffrn_standards_interval_time   ? 
_diffrn_standards_decay_%         ? 
_diffrn_reflns_number             69733 
_diffrn_reflns_av_R_equivalents   0.0673 
_diffrn_reflns_av_sigmaI/netI     0.0505 
_diffrn_reflns_limit_h_min        -15 
_diffrn_reflns_limit_h_max        15 
_diffrn_reflns_limit_k_min        -17 
_diffrn_reflns_limit_k_max        17 
_diffrn_reflns_limit_l_min        -22 
_diffrn_reflns_limit_l_max        22 
_diffrn_reflns_theta_min          1.11 
_diffrn_reflns_theta_max          25.00 
_reflns_number_total              12181
[truncated: 115,905 more chars]
